# Supplementary material
Source: PubMed Central journal article supplement (PMC9933208)
Supplement: NIHMS1861577-supplement-SI.pdf [file NIHMS1861577-supplement-SI.pdf]

## Supplementary Materials for

### Directed evolution of nonheme iron enzymes to access abiological radical-relay C(sp<sup>3</sup>)-H azidation

Jinyan Rui,<sup>1,\*</sup> Qun Zhao,<sup>1,\*</sup> Anthony J. Huls,<sup>1,\*</sup> Jordi Soler,<sup>2</sup> Jared C. Paris,<sup>3</sup> Zhenhong Chen,<sup>1</sup> Viktor Reshetnikov,<sup>1</sup> Yunfang Yang,<sup>4</sup> Yisong Guo,<sup>3,†</sup> Marc Garcia-Borràs,<sup>2,†</sup> Xiongyi Huang<sup>1,†</sup>

<sup>1</sup>*Department of Chemistry, Johns Hopkins University, Baltimore, MD 21218, USA.*

<sup>2</sup>*Institut de Química Computacional i Catàlisi (IQCC) and Departament de Química, Universitat de Girona, Campus Montilivi, Girona E-17071, Catalonia, Spain*

<sup>3</sup>*Department of Chemistry, Carnegie Mellon University, Pittsburgh, PA 15213, USA*

<sup>4</sup>*College of Chemical Engineering, Zhejiang University of Technology, Hangzhou, Zhejiang 310014, China*

†Corresponding author. E-mail: [xiongyi@jhu.edu](mailto:xiongyi@jhu.edu) (X.H.); [marc.garcia@udg.edu](mailto:marc.garcia@udg.edu) (M.G.B.); [ysguo@andrew.cmu.edu](mailto:ysguo@andrew.cmu.edu) (Y.G.)

\*These authors contributed equally to this work.

## Table of Contents

- I. Materials and Methods
- II. General Procedures
- III. Supporting Tables and Schemes
- IV. Sequence Information for Final Variants
- V. Substrate Synthesis and Characterization
- VI. Synthesis and Characterization of Authentic Azidation Products
- VII. GC-MS Standard Curves for Azidation Products
- VIII. Determination of Enantioselectivity
- IX. Preparative Scale Enzymatic Reactions
- X. Spectroscopic Studies
- XI. Computational Modelling
- XII. X-ray Crystallography and the Assignments of Absolute Configuration
- XIII. NMR Spectra

## I. Materials and Methods

Unless otherwise noted, all chemicals and reagents were obtained from commercial suppliers (Sigma-Aldrich, Alfa Aesar, Acros, AA Blocks, Combi-Blocks) and used without further purification. Silica gel chromatography was carried out using SiliaFlash Irregular Silica Gels F60, 40 - 63  $\mu\text{m}$ , 60  $\text{\AA}$ .  $^1\text{H}$  and  $^{13}\text{C}$  NMR were recorded on either a Bruker Avance 300, 400 or III HD 400 MHz spectrometer. Chemical shifts ( $\delta$ ) are reported in ppm downfield from tetramethylsilane, using the solvent resonance as the internal standard ( $^1\text{H}$  NMR:  $\delta = 7.26$ ,  $^{13}\text{C}$  NMR:  $\delta = 77.4$  for  $\text{CDCl}_3$ ). Sonication was performed using a Fisherbrand Model 120 Sonic Dismembrator. Chemical reactions were monitored using thin layer chromatography (Merck 60 gel plates) using a UV-lamp for visualization. Gas chromatography-mass spectrometry (GC-MS) analyses were carried out using an Agilent 5977B GC/MSD system and HP-5MS UI column (30.0 m  $\times$  0.25 mm) with the following oven temperature setting (helium flow 1 ml/min): Initial: 110  $^\circ\text{C}$  (hold 0 min); Ramp 1: 110-160  $^\circ\text{C}$  (20  $^\circ\text{C}/\text{min}$ , hold 0 min); Ramp 2: 160-225  $^\circ\text{C}$  (15  $^\circ\text{C}/\text{min}$ , hold 0 min); Ramp 3: 225-270  $^\circ\text{C}$  (30  $^\circ\text{C}/\text{min}$ , hold 4 min). Analytical chiral normal-phase HPLC analyses were performed using an Agilent 1260 series instrument with *i*-PrOH and hexanes as the mobile phase. Reverse-phase high-performance liquid chromatography-mass spectrometry (LC-MS) analysis was carried out using Agilent 1260 series instruments and Agilent 1260 LC/MSD iQ series instruments. Semi-preparative HPLC was performed using an Agilent XDB-C18 column (9.4 x 250 mm). Column chromatography was performed on a Biotage Isolera One system using Sfär Silica HC-High Capacity 20  $\mu\text{m}$  columns. Plasmid pET22b(+) was used as a cloning vector, and cloning was performed using Gibson assembly (1). Cells were grown using Luria-Bertani (LB) medium or terrific broth (TB) medium (RPI Research). Primer sequences are available upon request. T5 exonuclease, Phusion polymerase, and *Taq* ligase were purchased from New England Biolabs (NEB, Ipswich, MA). Potassium phosphate buffer (pH 7.4) was used as a buffering system for whole cells, lysates, and purified proteins, unless otherwise specified.

## II. General Procedures

**(A) Generation of enzyme variants.** All protein variants described in this paper were cloned and expressed using the pET-22b(+) vector or pET-28a(+) vector. The genes encoding non-heme iron proteins used in this work were obtained as a single gBlock (Twist Bioscience), codon-optimized for *E. coli*, and cloned using Gibson assembly into pET-22b(+) between restriction sites *NdeI* and *XhoI* in frame with a C-terminal 6xHis-tag or into pET-28a(+) between restriction sites *NdeI* and *BamHI* in frame with an N-terminal 6xHis-tag. This plasmid was transformed into *E. coli*<sup>®</sup> EXPRESS BL21(DE3) cells (Lucigen).

**(B) Enzyme expression.** 200 mL TB<sub>amp</sub> in a 1L flask was inoculated with an overnight culture (2 mL in LB<sub>amp</sub>) of recombinant *E. coli*<sup>®</sup> EXPRESS BL21(DE3) cells containing a pET-22b(+) plasmid encoding the non-heme iron enzyme variant. The culture was shaken at 37 °C and 240 rpm until the OD<sub>600</sub> was 0.7 (approximately 2 hours). The culture was placed on ice for 20 minutes, and isopropyl  $\beta$ -D-1-thiogalactopyranoside (IPTG) was added to final concentrations of 1 mM. The incubator temperature was reduced to 20.5 °C, and the culture was allowed to shake for 24 hours at 180 rpm. Cells were harvested by centrifugation (4 °C, 15 min, 4,000xg) and the cell pellet was resuspended in potassium phosphate buffer (pH 7.4),

**(C) Library construction.** Site-saturation mutagenesis libraries were generated using a modified QuikChange mutagenesis protocol using Phusion<sup>®</sup> High-Fidelity DNA Polymerase (New England Biolabs). The PCR products were digested with DpnI, gel purified, and the gaps were repaired using Gibson Mix<sup>™</sup> (I). Without further purification, 1  $\mu$ L of the Gibson product was used to transform 50  $\mu$ L of electrocompetent *Escherichia coli* BL21 *E. coli* (Lucigen) cells. Random mutagenesis was achieved with error-prone PCR using *Taq* polymerase (New England Biolabs) with a MnCl<sub>2</sub> concentration of 300  $\mu$ M.

**(D) Library screening.** Single colonies were picked with toothpicks off of LB<sub>amp</sub> agar plates and grown in deep-well (2 mL) 96-well plates containing LB<sub>amp</sub> (400  $\mu$ L) at 37 °C, 240 rpm shaking. After 16 hours, 50  $\mu$ L aliquots of these overnight cultures were transferred to deep-well 96-well plates containing TB<sub>amp</sub> (1 mL) using a 12-channel Eppendorf Xplorer<sup>®</sup> plus electronic pipettor. Glycerol stocks of the libraries were prepared by mixing cells in LB<sub>amp</sub> (100  $\mu$ L) with 50% v/v glycerol (100  $\mu$ L). Glycerol stocks were stored at -80 °C in 96-well microplates. Growth plates were allowed to shake for 3 hours at 37 °C, 240 rpm shaking. The plates were then placed on ice for 30 min. Cultures were induced by adding 10  $\mu$ L of a solution containing 100 mM isopropyl  $\beta$ -D-1-thiogalactopyranoside (IPTG). The incubator temperature was reduced to 20.5 °C, and the induced cultures were allowed to shake for 24 hours (230 rpm). Cells were pelleted (4,500xg, 5 min, 4 °C), resuspended in 400  $\mu$ L potassium phosphate buffer (pH 7.4), and the plates containing the cell suspensions were transferred to an anaerobic chamber. To deep-well plates of cell suspensions were added sodium azide (10  $\mu$ L per well, 1.0 M in water), ferrous ammonium sulfate (10  $\mu$ L per well, 100 mM in water), and the *N*-fluoroamide model substrate (10  $\mu$ L per well, 400 mM in dimethoxyethane (DME)). The plates were sealed with aluminum sealing tape and shaken at 680 rpm overnight in the chamber. The plates were then removed from the chamber and analyzed via the high-throughput (HTS) screening assay described in section (E). Hits from library screening were confirmed by small-scale biocatalytic reactions, as described in section (H).

**(E) High-throughput (HTS) fluorescent detection of azidation product in 96-well plate.** The reaction was performed following the procedure in section D. After the reaction, 400  $\mu$ L of *N,N*-dimethylformamide (DMF) was added to each well and the plate was incubated for 1

hour. The plate was then centrifuged to remove the insolubles. From each well, 5  $\mu$ L of the supernatant was transferred to a 96-well black fluorescence plate (Caplugs Evergreen) containing 195  $\mu$ L of 25% aqueous solution of DMF with 77  $\mu$ M CuSO<sub>4</sub>, 154  $\mu$ M BTAA ligand (Click Chemistry Tools), 5.1 mM ascorbic acid, 25.6 mM KPi (pH 7.4), and 103  $\mu$ M of fluorogenic alkyne probe 4-ethynyl-*N*-ethyl-1,8-naphthalimide (2). The fluorescence plate was incubated and the formation of the fluorescent triazole product was monitored by a TECAN Spark plate reader outfitted with a plate stacker (excitation wavelength, 357 nm; emission wavelength 462 nm; bandwidth, 20 nm). Validation of hit wells was further investigated by GC-MS. Hits from library screening were confirmed by small-scale biocatalytic reactions, as described in section (H).

**(F) Cell lysate preparation.** Cell lysates were prepared as follow: *E. coli* cells expressing non-heme iron enzyme variants were pelleted (4,000xg, 5 min, 4 °C), resuspended in potassium phosphate buffer and adjusted to the appropriate OD<sub>600</sub>. Cells were lysed by sonication (5 minutes, 5 seconds on, 5 seconds off, 40% duty cycle) for two times, aliquoted into 2 mL microcentrifuge tubes, and the cell debris was removed by centrifugation for 10 min (14,000xg, 4 °C). The supernatant was sterile filtered through a 0.45  $\mu$ m cellulose acetate filter, and the concentration of protein lysate was determined using the described in section (G). Using this protocol, the protein concentrations we typically observed for OD<sub>600</sub> = 10 lysates are in the 5 - 10  $\mu$ M range for *sav* HppD and its variants.

**(G) Protein concentration determination in cell lysates.** The quantity of His-tagged non-heme iron enzymes in cell lysates was determined using the His-tag protein ELISA kit according to the manufacturer's instructions (AKR-130 Cell Biolabs, San Diego, CA). Using this protocol, the protein concentrations we typically observed for OD<sub>600</sub> = 10 lysates were in the 5 - 10  $\mu$ M range for wild-type *Sav* HppD and its variants.

**(H) Small-scale biotransformations using whole *E. coli* cells.** In a typical experiment, ferrous ammonium sulfate (20  $\mu$ L, 100 mM in water), sodium azide (20  $\mu$ L, 1 M in water), and *N*-fluoroamide substrate (20  $\mu$ L, 1.5 M in DME) were added to *E. coli* harboring non-heme iron enzyme variant (400  $\mu$ L, adjusted to the appropriate OD<sub>600</sub>) in a 2 mL screw top GC vial in an anaerobic chamber. The vial was capped and shaken at 680 rpm at room temperature for 24 hours. At the end of the reaction, the vial was opened and the reaction was quenched with 6 mL of a hexanes/ethylacetate solution (4:6 v/v) of internal standard 1,2,3-trimethoxybenzene (0.5 mM final concentration). The reaction mixture was transferred to a 15 mL centrifuge tube, vortexed (10 seconds, 3 times), then centrifuged (10,500xg, 5 min) to completely separate the organic and aqueous layers. An aliquot (200 - 300  $\mu$ L) of the organic layer was used for product quantification via GCMS and enantioselectivity via chiral HPLC or chiral GC. The total turnover numbers (TTNs) reported are calculated with respect to non-heme iron enzymes expressed in *E. coli* and represent the total number of turnovers obtained from the catalyst under the stated reaction conditions.

**(I) Protein purification** Protein expression was conducted following the protocols detailed in section (B). *E. coli* cells expressing non-heme iron enzyme variants were pelleted (4,000xg, 5 min, 4 °C) and stored at -20 °C for at least 24 hours. The cell pellet was then resuspended in 50 mM KPi buffer containing 100 mM NaCl and 20 mM imidazole (pH 7.5 at 25 °C) (10 mL buffer per gram of cell pellet). Cells were lysed by sonication (5 minutes, 5 seconds on, 5 seconds off, 40% duty cycle) for two times and the cell debris was removed by centrifugation for 10 min (10,300xg, 4 °C). The supernatant was sterile filtered through a 0.45  $\mu$ m cellulose acetate filter and purified using a 5 mL Ni-NTA column (HisTrap HP, Cytiva) using an ÄKTA

start protein purification system (Cytiva). The proteins were eluted from the column by running a gradient from 20 to 500 mM imidazole over 10 column volumes. Fractions containing purified proteins were detected by SDS-PAGE, pooled and concentrated using Millipore® centrifugal filter. The protein solution was dialyzed first against 1 L of buffer with 10 mM EDTA in 50 mM KPi (pH 7.5 at 25 °C), and then two times against 1 L of 50 mM KPi. Final concentration was measured by absorbance at 280 nm using a NanoDrop spectrophotometer. The theoretical extinction coefficients ( $M^{-1} \text{ cm}^{-1}$ ) used for *Sav* HppD and its variants were calculated using ExPASy Bioinformatics Resources Portal, <http://www.expasy.org>.

### III. Supporting Tables, Figures and Schemes

**Table S1.** Preliminary screening experiments with non-heme iron proteins.<sup>a</sup>

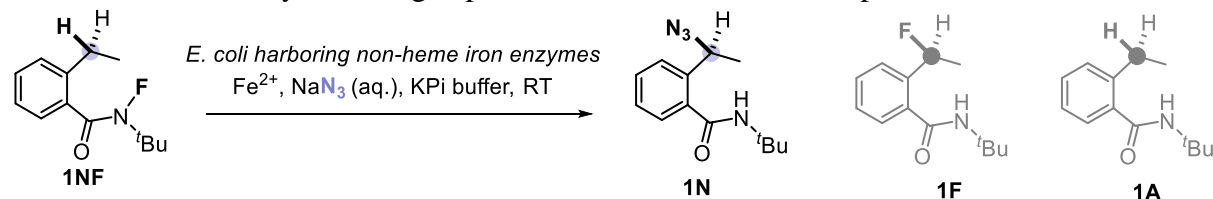

| Entry     | Enzyme                                                                  | Organism                             | Uniprot No. | 1N%        | e.r. <sup>d</sup> | 1F%  | 1A%  |
|-----------|-------------------------------------------------------------------------|--------------------------------------|-------------|------------|-------------------|------|------|
| <b>1</b>  | <b>4-hydroxyphenylpyruvate dioxygenase (HppD)<sup>a</sup></b>           | <i>Streptomyces avermitilis</i>      | Q53586      | 33.0 ± 2.0 | 63:37             | 3.7  | 10.0 |
| <b>2</b>  | Proline <i>cis</i> -4-hydroxylase (P4H) <sup>b</sup>                    | <i>Mesorhizobium japonicum</i>       | Q989T9      | 0.5        | n.d.              | 0.4  | 5.0  |
| <b>3</b>  | Iron/2-oxoglutarate-dependent halogenase WelO5 <sup>b</sup>             | <i>Hapalosiphon welwitschii</i>      | A0A067YX61  | 0.1        | n.d.              | 0.3  | 2.5  |
| <b>4</b>  | polyoxin hydroxylase PolL <sup>c</sup>                                  | <i>Streptomyces aureochromogenes</i> | J7FW05      | 0.6        | n.d.              | 0.4  | 8.6  |
| <b>5</b>  | Prolyl 4-hydroxylase <sup>c</sup>                                       | <i>Bacillus anthracis</i>            | A0A4Y1WAP5  | n.d.       | n.d.              | n.d. | n.d. |
| <b>6</b>  | Prolyl 4-hydroxylase <sup>bc</sup>                                      | <i>Paramecium bursaria</i>           | Q84406      | 0.2        | n.d.              | 0.7  | 6.7  |
| <b>7</b>  | Iron/2-oxoglutarate-dependent halogenase AsqJ <sup>c</sup>              | <i>Emericella nidulans</i>           | Q5AR53      | 0.1        | n.d.              | 0.5  | 5.0  |
| <b>8</b>  | Isopenicillin N synthase (IPNS) <sup>b</sup>                            | <i>Emericella nidulans</i>           | P05326      | 4.0 ± 0.1  | 44:56             | 1.5  | 8.0  |
| <b>9</b>  | ( <i>S</i> )-2-hydroxypropylphosphonic acid epoxidase Psf4 <sup>b</sup> | <i>Pseudomonas syringae</i>          | Q9JN69      | 0.1        | n.d.              | 0.3  | 3.3  |
| <b>10</b> | KPi buffer without whole-cell catalyst                                  |                                      |             | 0.1        | n.d.              | 0.3  | 0.5  |
| <b>11</b> | <i>Sav</i> HppD H187A H270A as the catalyst                             |                                      |             | 0.2        | n.d.              | 0.2  | 7.5  |
| <b>12</b> | wt <i>Sav</i> HppD, no azide addition                                   |                                      |             | n.d.       | n.d.              | 2.2  | 6.5  |

<sup>a</sup>1N%, 1F%, and 1A% refer to the yield of 1N, 1F, and 1A, respectively. <sup>b</sup>pET-22b(+) was used as the cloning vector. <sup>c</sup>pET-28a(+) was used as the cloning vector. <sup>d</sup>not determined (n.d.)

**Procedures:** In an anaerobic chamber, ferrous ammonium sulfate (10  $\mu\text{L}$ , 100 mM in water), sodium azide (10  $\mu\text{L}$ , 1 M in water), and *N*-fluoroamide substrate **1NF** (10  $\mu\text{L}$ , 400 mM in DME) were added to *E. coli* harboring non-heme iron enzymes (400  $\mu\text{L}$ , adjusted to  $\text{OD}_{600} = 40$ ) in a 2 mL screw top GC vial. The vial was capped and shaken at 680 rpm at room temperature for 24 hours. At the end of the reaction, the vial was opened and the reaction was quenched with 0.8 mL of a hexanes/ethylacetate solution (4:6 v/v) of internal standard 1,2,3-trimethoxybenzene (0.5 mM final concentration). The reaction mixture was transferred to a 2 mL microcentrifuge tube, vortexed (10 seconds, 3 times), then centrifuged (14,000xg, 5 min) to completely separate the organic and aqueous layers. An aliquot (200 - 300  $\mu\text{L}$ ) of the organic layer was used for product quantification via GCMS and enantioselectivity via chiral HPLC or chiral GC.

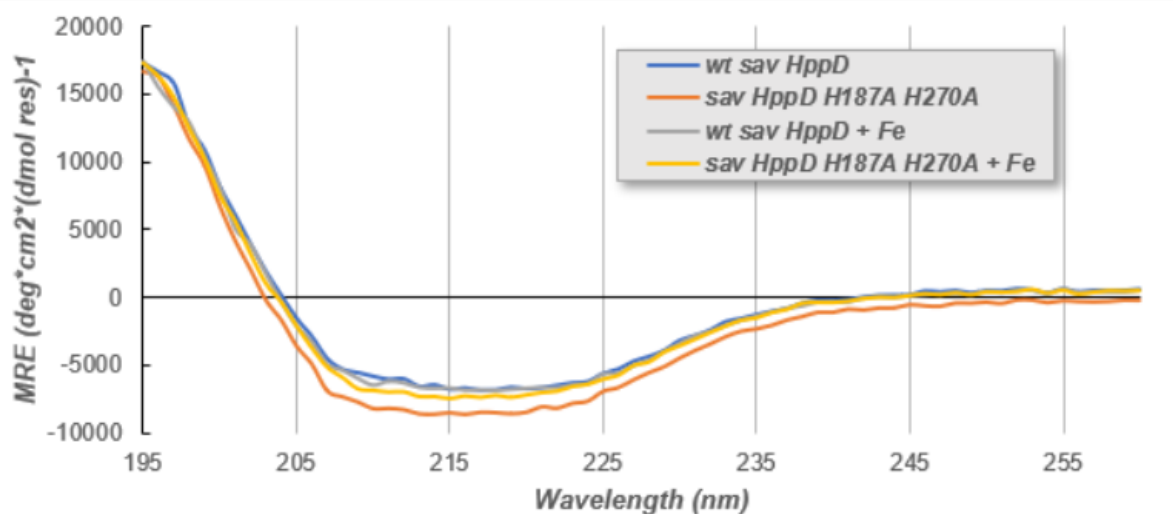

**Figure S1.** Comparison of the circular dichroism spectra obtained from wt *Sav HppD* and wt *Sav HppD H187A H270A* variant with and without addition of Fe<sup>2+</sup> salt. Purified protein samples prepared according to general procedure (I) in section 2 were diluted and normalized to 0.2 mg/mL protein. To an aliquot of each sample, a concentrated stock solution of Mohr's salt was added to a final concentration of 10  $\mu\text{M}$ , or water was added to keep a uniform concentration. Spectra were taken between 195 – 260 nm. Molar residue ellipticity (MRE) is reported.



**Scheme S1.** Determination of coefficient of variation (CV) for the HTS platform.

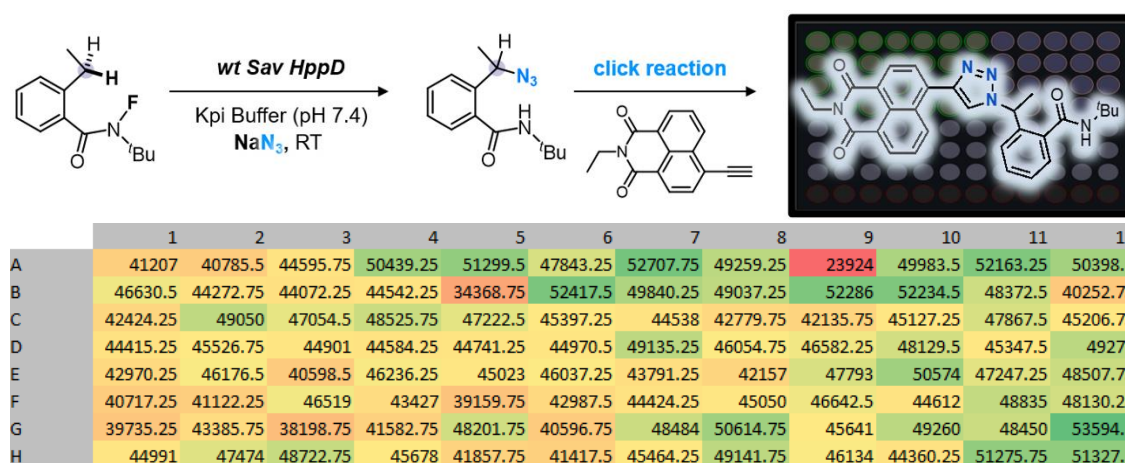

**Experimental details:** A 96-well plate for CV test was prepared according to the procedures described in section D. The protein expression and azidation reaction were performed following the protocols detailed in section D. Each well contained the same biocatalyst (wild-type *Sav HppD*). After the reaction, the azidation products formed in each well were quantified via the protocol described in section E. The CV was determined to be ~9% by dividing the standard deviation by the mean across the whole data set of the 96-well-plate reaction. The 1,8-naphthalimide-based fluorogenic probe was synthesized following the known literature procedure (2).

### Detection limit

The detection limit of the HTS assay was determined by measuring the fluorescence intensity of samples with varying amount of organic azide product (0 – 260  $\mu\text{M}$ ) in a buffer medium containing 15 mM  $\text{NaN}_3$ . The presence of  $\text{NaN}_3$  is to mimic the reaction conditions. Before measurement, samples were treated with 4-ethynyl-*N*-ethyl-1,8-naphthalimide probe and incubated for 1.5 hours following the protocol described in section (E). Reactions containing organic azide were measured in triplicate, and the blank was measured 9 times to determine the standard deviation. Detection limit was calculated from the best-fit equation using the definition of instrument detection limit:

$$S(\text{LOD}) = \mu_b + [3.3 \times \sigma_b]$$

Where the signal corresponding to the limit of detection (denoted as  $S(\text{LOD})$ ) is defined as the signal given from the average signal of the blank measurement,  $\mu_b$ , plus 3.3 times the standard deviation of the blank,  $\sigma_b$ . With this equation, the detection limit was calculated to be *ca.* 4  $\mu\text{M}$ . There was good linearity between fluorescence intensity and organic azide concentration in the range of 25 – 260  $\mu\text{M}$  of organic azide.

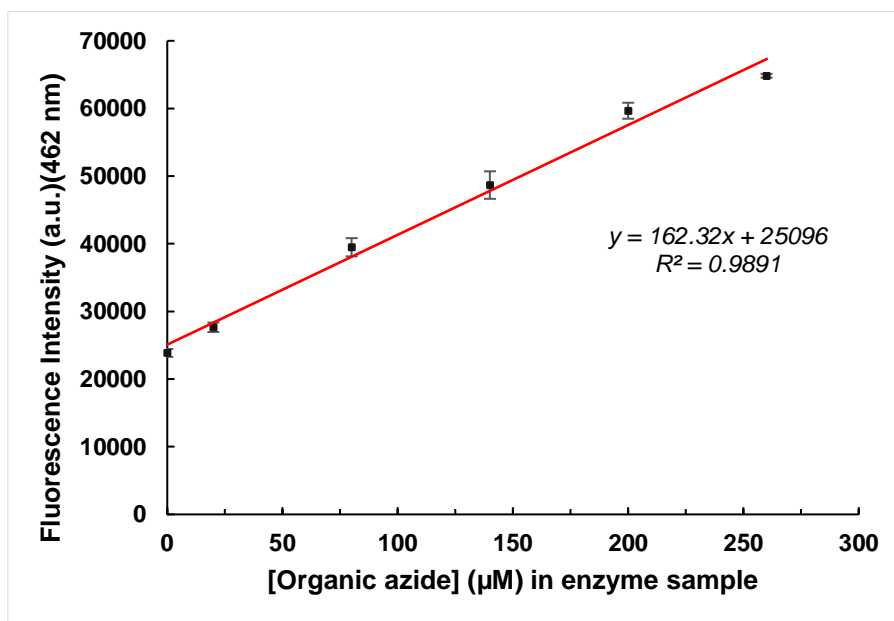

**Figure S2.** Fluorescence signal of alkyne probe in  $\text{H}_2\text{O}/\text{DMF}$  solution ( $V_{\text{H}_2\text{O}}:V_{\text{DMF}} = 7:1$ , 25 mM  $\text{KP}_i$ , pH 7.0) in the presence of increasing amount of organic azide.

**Table S2.** Representative variants of *Sav* HppD identified during the course of evolution.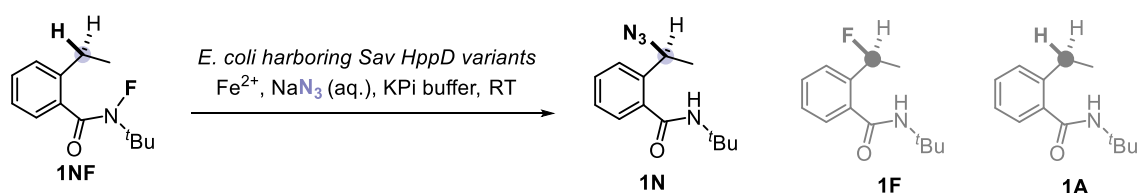

| Entry | Acronym            | Mutations from wt <i>Sav</i> HppD            | TTN       | e.r.  | 1N/1F | 1N/1A |
|-------|--------------------|----------------------------------------------|-----------|-------|-------|-------|
| 1     | wt <i>Sav</i> HppD | None                                         | 250 ± 10  | 63:37 | 9.0   | 3.0   |
| 2     | HppD AQ            | V189A N245Q                                  | 320 ± 20  | 76:24 | 18.8  | 7.8   |
| 3     | HppD AQI           | V189A N245Q L367I                            | 410 ± 10  | 79:21 | 27.6  | 9.8   |
| 4     | HppD AQAI          | V189A N245Q Q255A L367I                      | 760 ± 20  | 87:13 | 35.5  | 9.3   |
| 5     | HppD Az1           | V189A F216A N245Q Q255A<br>P243A L367I       | 1340 ± 40 | 86:14 | 53.8  | 15.5  |
| 6     | HppD ALGFPI        | V189A S230L P243G N245F<br>Q255P L367I       | 430 ± 30  | 94:6  | 33.2  | 13.4  |
| 7     | HppD Az2           | V189A N191A S230L P243G<br>N245F Q255P L367I | 490 ± 20  | 96:4  | 30.6  | 19.3  |

**Procedures:** In an anaerobic chamber, ferrous ammonium sulfate (10  $\mu$ L, 100 mM in water), sodium azide (10  $\mu$ L, 1 M in water), and *N*-fluoroamide substrate **1NF** (10  $\mu$ L, 400 mM in DME) were added to *E. coli* harboring non-heme iron enzymes (400  $\mu$ L, adjusted to OD<sub>600</sub> = 10) in a 2 mL screw top GC vial. The vial was capped and shaken at 680 rpm at room temperature for 24 hours. At the end of the reaction, the vial was opened and the reaction was quenched with 0.8 mL of a hexanes/ethylacetate solution (4:6 v/v) of internal standard 1,2,3-trimethoxybenzene (0.5 mM final concentration). The reaction mixture was transferred to a 2 mL microcentrifuge tube, vortexed (10 seconds, 3 times), then centrifuged (14,000xg, 5 min) to completely separate the organic and aqueous layers. An aliquot (200 - 300  $\mu$ L) of the organic layer was used for product quantification via GCMS and enantioselectivity via chiral HPLC or chiral GC. Protein concentrations in whole cell solutions were determined using cell lysis and protein concentration measurement protocols described in sections F and G.

## Michaelis–Menten Kinetic Analyses

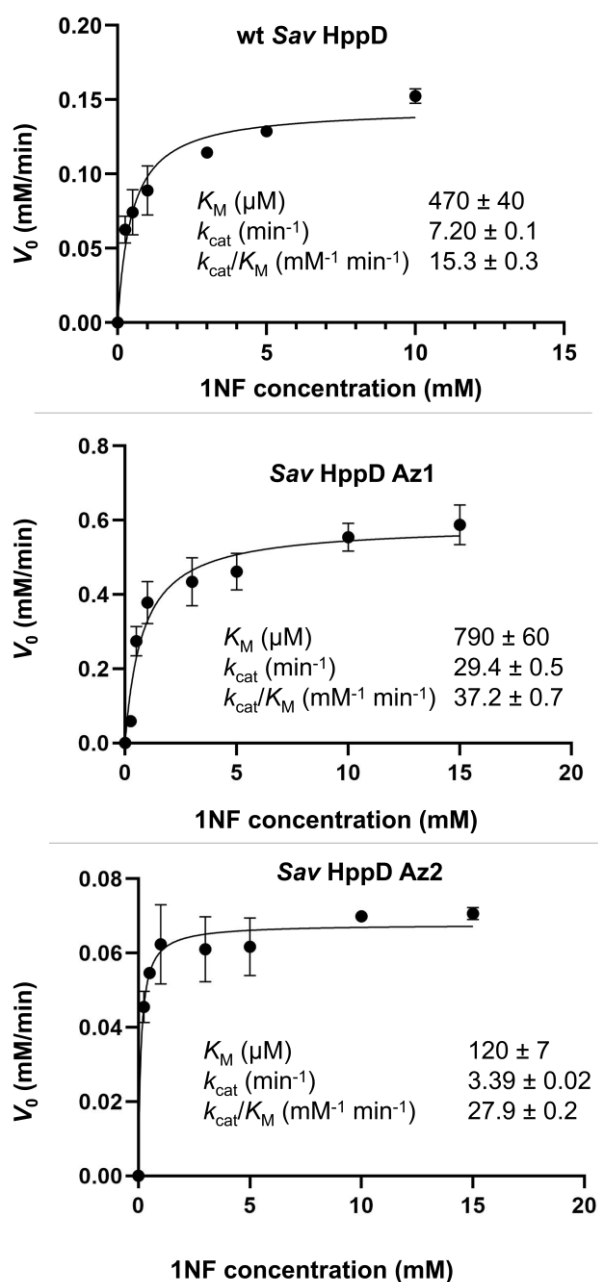

**Figure S3.** Michaelis-Menten parameters for the C–H azidation catalyzed by wt *Sav* HppD, *Sav* HppD Az1, and *Sav* HppD Az2 variants. **Experimental details:** In an anaerobic chamber, ferrous ammonium sulfate (10  $\mu\text{L}$ , 100 mM in water) and sodium azide (10  $\mu\text{L}$ , 1 M in water) were added to a buffer solution containing purified *Sav* HppD protein variant (20  $\mu\text{M}$ , 2.4 mL) and the solution was shaken at 600 rpm for 5 minutes. A 1,2-dimethoxyethane solution of *N*-fluoroamide substrate **1NF** was added to the solution (final concentration ranging from 0.25 mM to 15 mM in reaction solution). An aliquot of 100  $\mu\text{L}$  of the reaction mixture was removed at 3, 6, 9, 12, and 15 minutes and quenched by vortexing with 300  $\mu\text{L}$  6:4 EtOAc/hexanes solution containing 0.5 mM (final concentration) internal standard 1,2,3-trimethoxybenzene. After centrifugation at 12,000 rpm for 10 mins, an aliquot (200  $\mu\text{L}$ ) of the organic layer was taken for GCMS analysis for product quantification. Experiments were performed in triplicates.

**Table S3.** Reaction optimization for the biocatalytic azidation reaction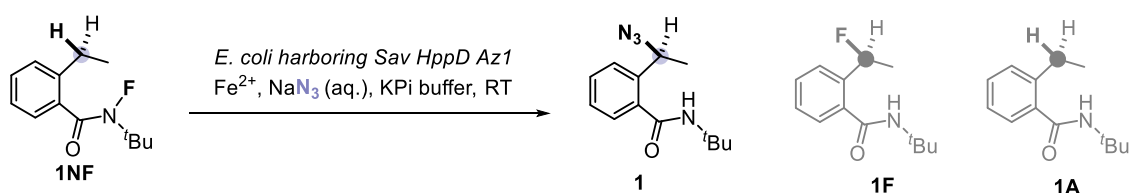

| Entry          | Variations from initial conditions                                                                                                                                           | TTN       | e.r.  | 1/1F | 1/1A |
|----------------|------------------------------------------------------------------------------------------------------------------------------------------------------------------------------|-----------|-------|------|------|
| 1              | None                                                                                                                                                                         | 1340 ± 40 | 87:13 | 54.0 | 15.5 |
| 2              | $\text{NaN}_3$ (20 $\mu\text{L}$ , 1 M)                                                                                                                                      | 1550 ± 40 | 87:13 | 52.0 | 14.0 |
| 3              | $\text{OD}_{600} = 10$                                                                                                                                                       | 1940 ± 20 | 87:13 | 48.0 | 16.4 |
| 4              | <b>1NF</b> (10 $\mu\text{L}$ , 800 mM), $\text{OD}_{600} = 10$                                                                                                               | 2480 ± 30 | 87:13 | 52.0 | 18.0 |
| 5              | <b>1NF</b> (10 $\mu\text{L}$ , 1.5 M), $\text{Fe}^{2+}$ (20 $\mu\text{L}$ , 100 mM)<br>$\text{NaN}_3$ (40 $\mu\text{L}$ , 1 M), $\text{OD}_{600} = 10$                       | 3100 ± 60 | 87:13 | 47.0 | 19.5 |
| 6 <sup>a</sup> | <b>1NF</b> (20 $\mu\text{L}$ , 1.5 M), $\text{Fe}^{2+}$ (20 $\mu\text{L}$ , 100 mM)<br>$\text{NaN}_3$ (40 $\mu\text{L}$ , 1 M), $\text{OD}_{600} = 10$                       | 4290 ± 50 | 87:13 | 55.0 | 20.0 |
| 7              | <b>1NF</b> (20 $\mu\text{L}$ , 1.5 M), $\text{Fe}^{2+}$ (20 $\mu\text{L}$ , 100 mM)<br>$\text{NaN}_3$ (40 $\mu\text{L}$ , 1 M), $\text{OD}_{600} = 10$ , <b>Az2 variant</b>  | 260 ± 30  | 96:4  | 18.0 | 7.0  |
| 8              | <b>1NF</b> (10 $\mu\text{L}$ , 400 mM), $\text{Fe}^{2+}$ (10 $\mu\text{L}$ , 100 mM)<br>$\text{NaN}_3$ (10 $\mu\text{L}$ , 1 M), $\text{OD}_{600} = 10$ , <b>Az2 variant</b> | 490 ± 20  | 96:4  | 30.6 | 19.3 |
| 9              | <b>1NF</b> (20 $\mu\text{L}$ , 1.5 M), $\text{Fe}^{2+}$ (20 $\mu\text{L}$ , 100 mM)<br>$\text{NaN}_3$ (40 $\mu\text{L}$ , 1 M), $\text{OD}_{600} = 40$ , <b>Az2 variant</b>  | 1820 ± 50 | 96:4  | 34.0 | 21.0 |

<sup>a</sup>Extraction was performed with 6 mL of internal standard solution.

**Initial conditions:** In an anaerobic chamber, ferrous ammonium sulfate (10  $\mu\text{L}$ , 100 mM in water), sodium azide (10  $\mu\text{L}$ , 1 M in water), and *N*-fluoroamide substrate **1NF** (10  $\mu\text{L}$ , 400 mM in DME) were added to *E. coli* harboring *Sav HppD Az1* (400  $\mu\text{L}$ , adjusted to  $\text{OD}_{600} = 20$ ) in a 2 mL screw top GC vial. The vial was capped and shaken at 680 rpm at room temperature for 24 hours. At the end of the reaction, the vial was opened and the reaction was quenched with 0.8 mL of a hexanes/ethylacetate solution (4:6 v/v) of internal standard 1,2,3-trimethoxybenzene (0.5 mM final concentration). The reaction mixture was transferred to a 2 mL microcentrifuge tube, vortexed (10 seconds, 3 times), then centrifuged (14,000 $\times$ g, 5 min) to completely separate the organic and aqueous layers. An aliquot (200 - 300  $\mu\text{L}$ ) of the organic layer was used for product quantification via GCMS and enantioselectivity via chiral HPLC or chiral GC. Protein concentrations in whole cell solutions were determined using cell lysis and protein concentration measurement protocols described in sections F and G. The conditions in entry 6 (highlighted in blue) were used for substrate scope investigation with *Az1* variant, whereas the conditions in entry 9 (highlighted in green) were used for substrate scope investigation with *Az2* variant.

**Scheme S2.** Substrates that are not active for this biocatalytic azidation reaction.

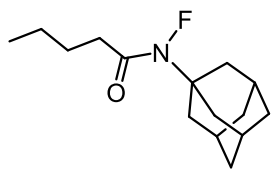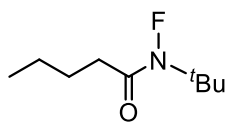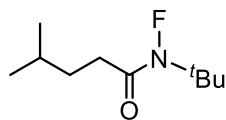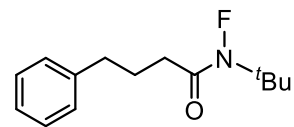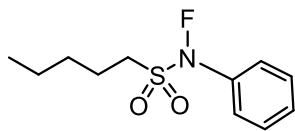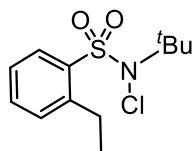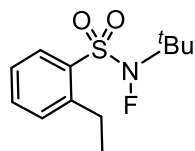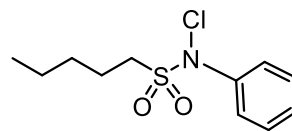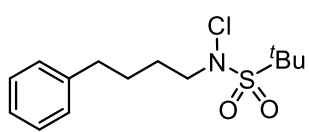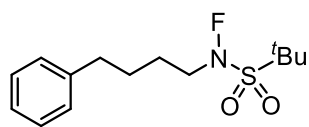

**Table S4. Scope of nucleophilic anions for the developed enzymatic radical relay reaction**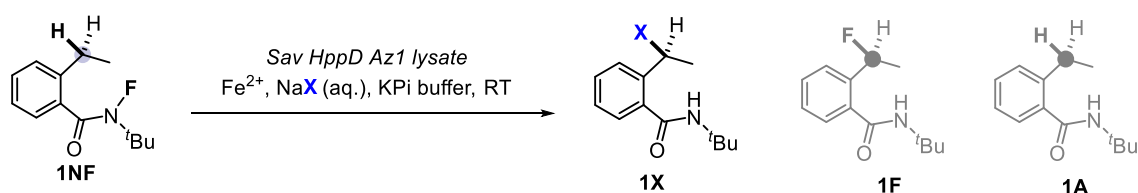

| Entry | NaX               | 1X/internal | e.r. | 1F/internal | 1A/internal |
|-------|-------------------|-------------|------|-------------|-------------|
| 1     | NaF               | n.d.        | n.d. | 0.04        | 2.5         |
| 2     | NaBr              | n.d.        | n.d. | 0.04        | 2.4         |
| 3     | NaOCN             | n.d.        | n.d. | 0.03        | 2.1         |
| 4     | NaSCN             | n.d.        | n.d. | 0.05        | 2.7         |
| 5     | NaNO <sub>2</sub> | n.d.        | n.d. | 0.03        | 1.9         |
| 6     | NaCl              | n.d.        | n.d. | 0.04        | 2.3         |
| 7     | NaCN              | n.d.        | n.d. | 0.04        | 2.4         |

**Procedures:** In an anaerobic chamber, ferrous ammonium sulfate (10  $\mu\text{L}$ , 100 mM in water), sodium halide or pseudohalide solution (10  $\mu\text{L}$ , 1 M in water), and *N*-fluoroamide substrate **1NF** (10  $\mu\text{L}$ , 400 mM in DME) were added to a 2 mL vial containing *Sav HppD Az1* cell lysate (400  $\mu\text{L}$ , obtained from  $\text{OD}_{600} = 20$  cell suspension following the general procedure F). The vial was capped and shaken at 680 rpm at room temperature for 24 hours. At the end of the reaction, the vial was opened and the reaction was quenched with 0.8 mL of a hexanes/ethylacetate solution (4:6 v/v) of internal standard 1,2,3-trimethoxybenzene (0.5 mM final concentration). The reaction mixture was transferred to a 2 mL microcentrifuge tube, vortexed (10 seconds, 3 times), then centrifuged (14,000 $\times$ g, 5 min) to completely separate the organic and aqueous layers. An aliquot (200 - 300  $\mu\text{L}$ ) of the organic layer was used for product quantification via GCMS. **1X**/internal refers to the ratio of peak area of **1X** over that of the internal standard as determined by GCMS total ion chromatogram. **1F**/internal and **1A**/internal were defined and calculated accordingly.

## Kinetic Isotope Effect

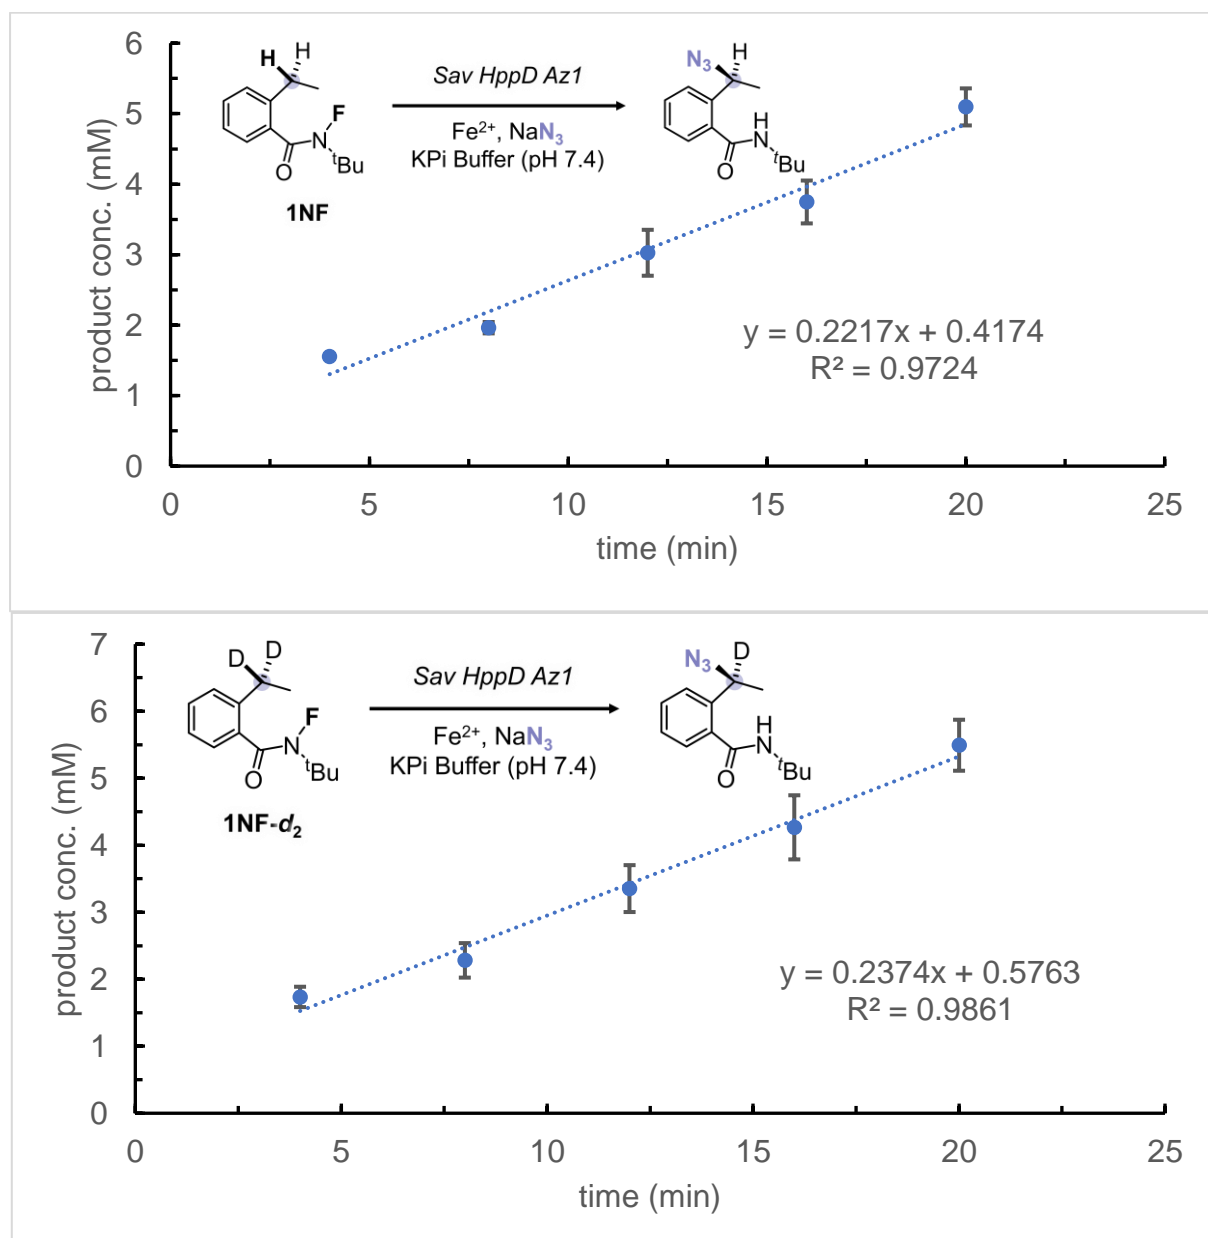

**Figure S4.** Kinetic isotope effect of C–H azidation catalyzed by *Sav HppD Az1*. Determination of initial rates: Initial rates were measured from independent reactions set up in parallel using purified *Sav HppD Az1* (protein concentration = 10  $\mu\text{M}$ ). Experimental details: In an anaerobic chamber, ferrous ammonium sulfate (10  $\mu\text{L}$ , 100 mM in water) and sodium azide (10  $\mu\text{L}$ , 1 M in water) were added to a buffer solution containing purified *Sav HppD Az1* (10  $\mu\text{M}$ , 2.4 mL) and the solution was shaken at 600 rpm for 5 minutes. A 1,2-dimethoxyethane solution of *N*-fluoroamide substrate **1NF** was added to the solution (final concentration 10 mM in reaction solution). An aliquot of 100  $\mu\text{L}$  of the reaction mixture was removed at 4, 8, 12, 16, and 20 minutes and quenched by vortexing with 300  $\mu\text{L}$  6:4 EtOAc/hexanes solution containing 0.5 mM (final concentration) internal standard 1,2,3-trimethoxybenzene. After centrifugation at 12,000 rpm for 10 mins, an aliquot (200  $\mu\text{L}$ ) of the organic layer was taken for GCMS analysis for product quantification.



## Multivariate analysis of substituent effect

**Scheme S3.** Multivariate analysis was carried out following the method developed by Fujita and Nishioka using the equation  $\log(k_X/k_H) = \rho\sigma + fF + \delta E_s + c$  (3). In this equation,  $\sigma$  is the substituent constant for ordinary polar effect,  $F$  is the Swain-Lupton  $F$  constant for the consideration of proximal polar effect, and  $E_s$  is the substituent constant for steric effect of a substituent,  $c$  is the intercept, and  $\rho$ ,  $f$ , and  $\delta$  are susceptibility constants. **(A)** Multivariate analysis of substituent effect assuming that N–F activation is the rate-determining step. **(B)** Multivariate analysis of substituent effect assuming that 1,5-hydrogen atom transfer is the rate-determining step. For both mechanistic scenarios, low  $R^2$  values were obtained for multivariate analysis. Nonetheless, the negative  $\rho$  and  $f$  values in both cases suggests the accumulation of partial negative charge in the transition state of the rate-determining step, whereas the positive  $\delta$  value indicates the steric properties of the substituent could negatively impact the reactivity.

|                                                                           |                                                                                     |          |          |          |                                   |                            |                       |                         |
|---------------------------------------------------------------------------|-------------------------------------------------------------------------------------|----------|----------|----------|-----------------------------------|----------------------------|-----------------------|-------------------------|
| <b>(A)</b>                                                                | 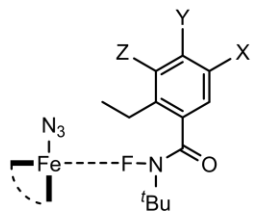   | <b>X</b> | <b>Y</b> | <b>Z</b> | <b><math>\log(k_X/k_H)</math></b> | <b><math>\sigma</math></b> | <b><math>F</math></b> | <b><math>E_s</math></b> |
|                                                                           |                                                                                     | H        | H        | Me       | -0.076                            | -0.17                      | -0.04                 | -1.24                   |
|                                                                           |                                                                                     | H        | H        | OMe      | -0.061                            | -0.27                      | 0.26                  | -0.55                   |
|                                                                           |                                                                                     | H        | H        | H        | 0.000                             | 0                          | 0                     | 0                       |
|                                                                           |                                                                                     | F        | H        | H        | -0.466                            | 0.06                       | 0.43                  | -0.46                   |
|                                                                           |                                                                                     | Me       | H        | H        | -0.375                            | -0.17                      | -0.04                 | -1.24                   |
|                                                                           |                                                                                     | H        | F        | H        | -0.236                            | 0.34                       | 0.43                  | -0.46                   |
| $\log(k_X/k_H) = -0.78\sigma - 0.14F + 0.24E_s + 0.028$<br>$(R^2 = 0.54)$ |                                                                                     |          |          |          |                                   |                            |                       |                         |
| <b>(B)</b>                                                                |  | <b>X</b> | <b>Y</b> | <b>Z</b> | <b><math>\log(k_X/k_H)</math></b> | <b><math>\sigma</math></b> | <b><math>F</math></b> | <b><math>E_s</math></b> |
|                                                                           |                                                                                     | H        | H        | Me       | -0.076                            | -0.07                      | -0.04                 | -1.24                   |
|                                                                           |                                                                                     | H        | H        | OMe      | -0.061                            | 0.12                       | 0.26                  | -0.55                   |
|                                                                           |                                                                                     | H        | H        | H        | 0.000                             | 0                          | 0                     | 0                       |
|                                                                           |                                                                                     | F        | H        | H        | -0.466                            | 0.34                       | 0.43                  | -0.46                   |
|                                                                           |                                                                                     | Me       | H        | H        | -0.375                            | -0.07                      | -0.04                 | -1.24                   |
|                                                                           |                                                                                     | H        | F        | H        | -0.236                            | 0.06                       | 0.43                  | -0.46                   |
| $\log(k_X/k_H) = -0.19\sigma - 0.44F + 0.23E_s + 0.018$<br>$(R^2 = 0.44)$ |                                                                                     |          |          |          |                                   |                            |                       |                         |

**Scheme S4.** Summary of known catalytic systems for C–N<sub>3</sub> bond formation via metal-catalyzed radical relay mechanisms (4-7).

Bao et al. *Nat. Commun.*, **2019**, *10*, 769.

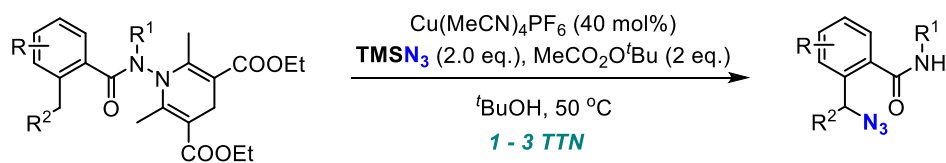

Torres-Ochoa et al. *Chem. Eur. J.*, **2019**, *25*, 9477.

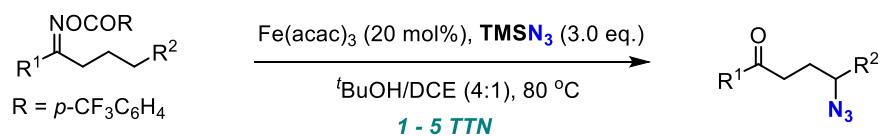

Bian et al. *Org. Biomol. Chem.*, **2020**, *18*, 5354.

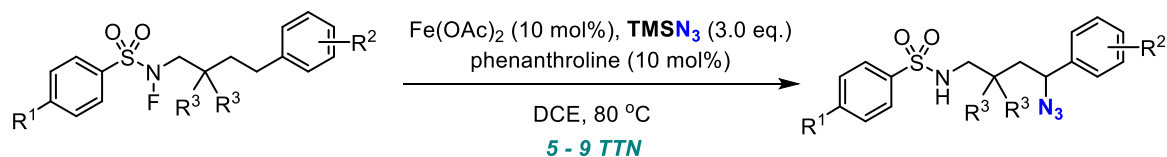

Min et al. *Org. Chem. Front.*, **2021**, *8*, 249

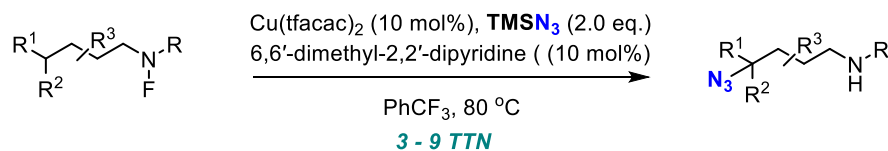

#### IV. Sequence information for final variants

The DNA sequences encoding 4-hydroxyphenylpyruvate dioxygenase (HppD) from *Streptomyces avermitilis* (Uniprot number Q53586) were codon-optimized for over-expression in *E. coli*, synthesized, and inserted into the NdeI and XhoI restriction sites of expression vector pET-22b(+). The gene sequences of wild-type *Sav* HppD and the final variants *Sav* HppD Az1 and *Sav* HppD Az2 are shown below (mutations highlighted in blue).

##### wt *Sav* HppD

```
ATGACGCAGACTACACATCACACGCCCGACACGGCACGTCAGGCAGATCCATTT
CCAGTGAAGGGTATGGATGCTGTTGTGTTTCGCTGTAGGTAATGCAAAACAGGCG
GCGCACTATTACAGCACAGCCTTTGGGATGCAGTTGGTGGCCTACAGTGGTCCCG
AAAATGGGAGCCGTGAGACCGCCTCGTATGTCTTGACCAACGGATCAGCGCGTT
TCGTCCTGACAAGCGTTATTAAGCCGGCCACGCCATGGGGACATTTCCCTTGCAGA
TCACGTTGCAGAGCACGGAGATGGAGTTGTAGACCTGGCTATTGAAGTCCCCGA
CGCCCGTGCCGCTCACGCCTACGCTATCGAACACGGTGCCCGCTCCGTGGCGGAA
CCGTACGAATTAAGGACGAGCACGGCACGGTCGTTTTGGCTGCCATCGCCACCT
ACGGCAAAACGCGCCACACACTGGTAGACCGTACGGGCTACGACGGGCCATACT
TGCCGGGGTACGTAGCTGCCGCCCTATTGTCGAGCCCCCTGCGCACCGCACCTT
CCAAGCTATTGACCACTGTGTAGGTAATGTGGAATTAGGACGCATGAACGAATG
GGTGGGCTTCTATAATAAGGTTATGGGGTTCACCAACATGAAAGAGTTTGTAGGG
GATGACATTGCAACAGAATATTCGGCCCTGATGTCAAAGTGGTTCGCTGATGGG
ACCCTTAAAGTAAAATTTCCATTAACGAACCCGCTTTAGCAAAGAAGAAATCTC
AAATTGATGAATACTTAGAATTTTACGGAGGAGCGGGAGTCCAACATATCGCTTT
AAACACGGGCGACATCGTGGAGACGGTCCGTACCATGCGTGCAGCTGGGGTACA
ATTCCTGGACACTCCCGATTACTACTATGACACGCTTGGTGGTGGGTTGGCGAT
ACTCGTGTTCGGTTCGACACTCTTCGTGAGCTGAAAATCTTGGCGGATCGCGACG
AGGATGGATACTTATTACAAATTTTACTAAACCAGTGCAGGACCGTCCTACCGT
TTTCTTCGAAATTATTGAGCGTCATGGGAGCATGGGGTTTGGTAAGGGGAATTC
AAGGCCCTTTTGAGGCAATCGAGCGTGAGCAAGAGAAACGCGGGAATTTA
```

##### *Sav* HppD Az1 (V189A F216A N245Q Q255A P243A L367I)

```
ATGACGCAGACTACACATCACACGCCCGACACGGCACGTCAGGCAGATCCATTT
CCAGTGAAGGGTATGGATGCTGTTGTGTTTCGCTGTAGGTAATGCAAAACAGGCG
GCGCACTATTACAGCACAGCCTTTGGGATGCAGTTGGTGGCCTACAGTGGTCCCG
AAAATGGGAGCCGTGAGACCGCCTCGTATGTCTTGACCAACGGATCAGCGCGTT
TCGTCCTGACAAGCGTTATTAAGCCGGCCACGCCATGGGGACATTTCCCTTGCAGA
TCACGTTGCAGAGCACGGAGATGGAGTTGTAGACCTGGCTATTGAAGTCCCCGA
CGCCCGTGCCGCTCACGCCTACGCTATCGAACACGGTGCCCGCTCCGTGGCGGAA
CCGTACGAATTAAGGACGAGCACGGCACGGTCGTTTTGGCTGCCATCGCCACCT
ACGGCAAAACGCGCCACACACTGGTAGACCGTACGGGCTACGACGGGCCATACT
TGCCGGGGTACGTAGCTGCCGCCCTATTGTCGAGCCCCCTGCGCACCGCACCTT
CCAAGCTATTGACCACTGTGCTGGTAATGTGGAATTAGGACGCATGAACGAATG
GGTGGGCTTCTATAATAAGGTTATGGGGTTCACCAACATGAAAGAGGCTGTAGG
GGATGACATTGCAACAGAATATTCGGCCCTGATGTCAAAGTGGTTCGCTGATGG
GACCCTTAAAGTAAAATTTGCTATTCAGGAACCCGCTTTAGCAAAGAAGAAATCT
GCTATTGATGAATACTTAGAATTTTACGGAGGAGCGGGAGTCCAACATATCGCTT
TAAACACGGGCGACATCGTGGAGACGGTCCGTACCATGCGTGCAGCTGGGGTAC
```

AATTCCTGGACACTCCCGATTTCATACTATGACACGCTTGGTGAGTGGGTGGCGA  
TACTCGTGTTCCGGTCGACACTCTTCGTGAGCTGAAAATCTTGGCGGATCGCGAC  
GAGGATGGATACTTATTACAAATTTTTACTAAACCAGTGCAGGACCGTCCTACCG  
TTTTCTTCGAAATTATTGAGCGTCATGGGAGCATGGGGTTTGGTAAGGGGAATTT  
CAAGGCC**ATT**TTTGAGGCAATCGAGCGTGAGCAAGAGAAACGCGGGAATTTA

**Sav HppD Az2 (V189A N191A S230L P243G N245F Q255P L367I)**

ATGACGCAGACTACACATCACACGCCCGACACGGCACGTCAGGCAGATCCATTT  
CCAGTGAAGGGTATGGATGCTGTTGTGTTTCGCTGTAGGTAATGCAAAACAGGCG  
GCGCACTATTACAGCACAGCCTTTGGGATGCAGTTGGTGGCCTACAGTGGTCCCG  
AAAATGGGAGCCGTGAGACCGCCTCGTATGTCTTGACCAACGGATCAGCGCGTT  
TCGTCCTGACAAGCGTTATTAAGCCGGCCACGCCATGGGGACATTTCCCTTGCAGA  
TCACGTTGCAGAGCACGGAGATGGAGTTGTAGACCTGGCTATTGAAGTCCCCGA  
CGCCCGTGCCGCTCACGCCTACGCTATCGAACACGGTGCCCGCTCCGTGGCGGAA  
CCGTACGAATTAAGGACGAGCACGGCACGGTCGTTTTGGCTGCCATCGCCACCT  
ACGGCAAAACGCGCCACACACTGGTAGACCGTACGGGCTACGACGGGCCATACT  
TGCCGGGGTACGTAGCTGCCGCCCTATTGTCGAGCCCCCTGCGCACCGCACCTT  
CCAAGCTATTGACCACTGT**GCTGGT****GCG**GTGGAATTAGGACGCATGAACGAATG  
GGTGGGCTTCTATAATAAGGTTATGGGGTTCACCAACATGAAAGAGTTTGTAGGG  
GATGACATTGCAACAGAATATTCGGCCCTGATG**CTT**AAAGTGGTCGCTGATGGG  
ACCCTTAAAGTAAAATTT**GGT**ATT**TTT**GAACCCGCTTTAGCAAAGAAGAAATCT**C**  
**CG**ATTGATGAATACTTAGAATTTTACGGAGGAGCGGGAGTCCAACATATCGCTTT  
AAACACGGGCGACATCGTGGAGACGGTCCGTACCATGCGTGCAGCTGGGGTACA  
ATTCCTGGACACTCCCGATTTCATACTATGACACGCTTGGTGAGTGGGTGGCGAT  
ACTCGTGTTCCGGTCGACACTCTTCGTGAGCTGAAAATCTTGGCGGATCGCGACG  
AGGATGGATACTTATTACAAATTTTTACTAAACCAGTGCAGGACCGTCCTACCGT  
TTTCTTCGAAATTATTGAGCGTCATGGGAGCATGGGGTTTGGTAAGGGGAATTT  
AAGGCC**ATT**TTTGAGGCAATCGAGCGTGAGCAAGAGAAACGCGGGAATTTA

## V. Substrate Synthesis and Characterization

### General Procedure for the synthesis of amide precursors

#### Synthetic procedure A

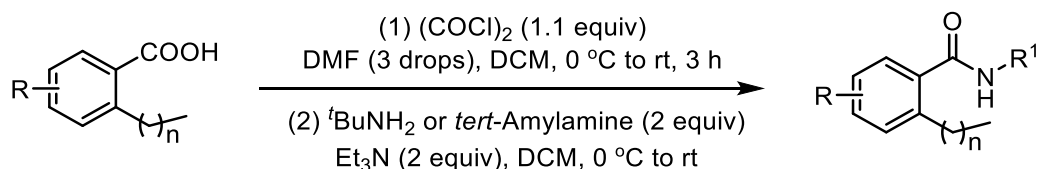

The carboxylic acid starting materials were commercially available or synthesized following a known literature procedure (8). To prepare the desired amide, oxalyl chloride (11 mmol, 1.1 equiv) was slowly added at 0 °C to a solution of the acid (10 mmol, 1.0 equiv) and DMF (3 drops) in dry DCM (15 mL). After stirring at room temperature for 3 h, the solvent was removed under vacuum and the residue was dissolved in dry DCM.  $t\text{BuNH}_2$  or *tert*-Amylamine (20 mmol, 2.0 equiv) and  $\text{Et}_3\text{N}$  (20 mmol, 2.0 equiv) were added and the reaction was followed by TLC until it completed. Water (100 mL) was added and the resulting mixture was extracted with DCM (3 × 150 mL). Removal of the solvent under vacuum and the crude amide was directly used in the next step.

#### Synthetic procedure B

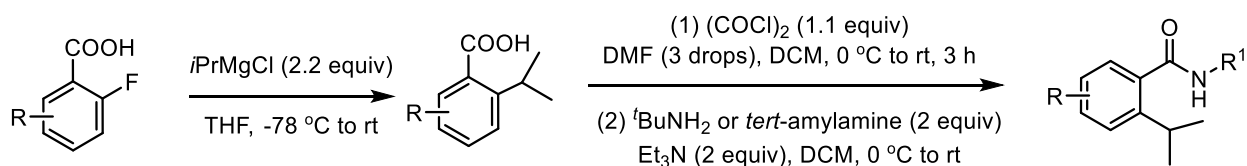

2-fluorobenzoic acid derivative (10 mmol, 1.0 equiv) was dissolved in dry THF and stirred at -78 °C under  $\text{N}_2$ .  $i\text{PrMgCl}$  (22 mmol, 2.2 equiv) was added to the solution at -78 °C. After stirring at room temperature for 48 h, the reaction was quenched with HCl (2.0 M). Then, water (100 mL) was added and the resulting mixture was extracted with DCM (3 × 150 mL). Removal of the solvent under vacuum and the crude amide was directly used in the next step. Oxalyl chloride (11 mmol, 1.1 equiv) was slowly added at 0 °C to a solution of the acid (10 mmol, 1.0 equiv) and DMF (3 drops) in dry DCM (15 mL). After stirring at room temperature for 3 h, the solvent was removed under vacuum and the residue was dissolved in dry DCM.  $t\text{BuNH}_2$  or *tert*-Amylamine (20 mmol, 2.0 equiv) and  $\text{Et}_3\text{N}$  (20 mmol, 2.0 equiv) were added and the reaction was followed by TLC until it completed. Water (100 mL) was added and the resulting mixture was extracted with DCM (3 × 150 mL). Removal of the solvent under vacuum and the crude amide was directly used in the next step.

### General Procedure for the synthesis of *N*-fluoro-2-alkylbenzamides

This synthesis protocol was following the known literature procedure (9). Namely, amide derivative (10 mmol, 1.0 equiv) was dissolved in dry THF and stirred at 0 °C under  $\text{N}_2$ .  $n\text{BuLi}$  (12 mmol, 1.2 equiv) was added dropwise. The reaction was maintained at 0 °C for 1.5 h. NFSI (1.5 equiv, 0.5 M in THF) was added. The reaction was left overnight in the ice bath and allowed to warm to room temperature. After 16 h, the reaction was quenched with 1 M aqueous HCl. Then, Water (100 mL) was added and the resulting mixture was extracted with DCM (3

150 mL). Removal of the solvent under vacuum and the crude was purified by Biotage flash chromatography to afford *N*-fluoroamides as yellow to red liquid.

#### *N*-(*tert*-butyl)-2-ethyl-*N*-fluorobenzamide (1NF)

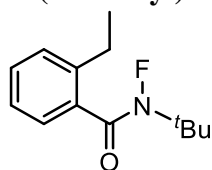

**<sup>1</sup>H NMR (300.1 MHz, CDCl<sub>3</sub>):** δ 7.38-7.18 (m, 4H), 2.74 (q, *J* = 7.6 Hz, 2H), 1.56 (d, *J* = 2.0 Hz, 9H), 1.25 (t, *J* = 7.6 Hz, 3H); **<sup>13</sup>C NMR (75 MHz, CDCl<sub>3</sub>):** δ 175.0 (d, *J* = 11.0 Hz), 141.6 (d, *J* = 2.2 Hz), 134.6 (d, *J* = 1.1 Hz), 130.0 (d, *J* = 1.1 Hz), 128.9 (d, *J* = 1.1 Hz), 127.1 (d, *J* = 4.4 Hz), 125.3 (d, *J* = 1.1 Hz), 64.2 (d, *J* = 10.3 Hz), 27.14 (d, *J* = 5.5 Hz), 26.1, 15.6; **<sup>19</sup>F NMR (282.4 MHz, CDCl<sub>3</sub>):** δ -62.8 (s). HRMS calcd for C<sub>26</sub>H<sub>36</sub>F<sub>2</sub>KN<sub>2</sub>O<sub>2</sub> (2M + K) 485.2382, found 485.2395. HRMS calcd for C<sub>26</sub>H<sub>36</sub>F<sub>2</sub>KN<sub>2</sub>O<sub>2</sub> (2M + K) 485.2382, found 485.2395.

#### *N*-(*tert*-butyl)-2-ethyl-*N*-fluoro-5-methylbenzamide (2NF)

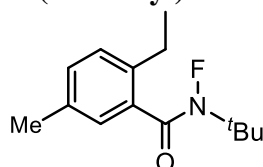

**<sup>1</sup>H NMR (300.1 MHz, CDCl<sub>3</sub>):** δ 7.16-7.15 (m, 2H), 7.12-7.11 (m, 1H), 2.69 (q, *J* = 7.6 Hz, 2H), 2.33 (s, 3H), 1.55 (d, *J* = 2.0 Hz, 9H), 1.22 (t, *J* = 7.6 Hz, 3H); **<sup>13</sup>C NMR (75 MHz, CDCl<sub>3</sub>):** δ 175.2 (d, *J* = 11.0 Hz), 138.5 (d, *J* = 2.2 Hz), 134.9 (d, *J* = 1.1 Hz), 134.5 (d, *J* = 1.1 Hz), 130.8 (d, *J* = 1.1 Hz), 128.8 (d, *J* = 1.1 Hz), 127.5 (d, *J* = 4.2 Hz), 64.3 (d, *J* = 10.5 Hz), 27.2 (d, *J* = 6.0 Hz), 25.7, 20.8, 15.7; **<sup>19</sup>F NMR (282.4 MHz, CDCl<sub>3</sub>):** δ -62.9 (s). HRMS calcd for C<sub>28</sub>H<sub>40</sub>F<sub>2</sub>KN<sub>2</sub>O<sub>2</sub> (2M + K) 513.2695, found 513.2689.

#### *N*-(*tert*-butyl)-2-ethyl-*N*,5-difluorobenzamide (3NF)

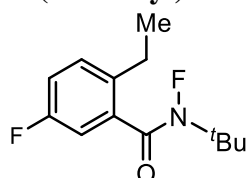

**<sup>1</sup>H NMR (300.1 MHz, CDCl<sub>3</sub>):** δ 7.24-7.19 (m, 1H), 7.09-6.99 (m, 2H), 2.69 (q, *J* = 7.6 Hz, 2H), 1.55 (d, *J* = 2.0 Hz, 9H), 1.22 (t, *J* = 7.6 Hz, 3H); **<sup>13</sup>C NMR (75 MHz, CDCl<sub>3</sub>):** δ 173.3 (dd, *J* = 11.0 Hz, 2.2 Hz), 160.3 (dd, *J* = 245.3 Hz, 1.4 Hz), 137.3 (dd, *J* = 3.8 Hz, 2.2 Hz), 135.9 (dd, *J* = 7.0 Hz, 0.8 Hz), 130.5 (dd, *J* = 7.0 Hz, 1.4 Hz), 116.9 (dd, *J* = 21.0 Hz, 1.4 Hz), 114.5 (dd, *J* = 23.1 Hz, 4.4 Hz), 64.5 (d, *J* = 10.3 Hz), 27.1 (d, *J* = 5.5 Hz), 25.4, 15.7; **<sup>19</sup>F NMR (282.4 MHz, CDCl<sub>3</sub>):** δ -63.2 (s), -116.9 – -117.0 (m). HRMS calcd for C<sub>26</sub>H<sub>34</sub>F<sub>4</sub>KN<sub>2</sub>O<sub>2</sub> (2M + K) 521.2193, found 521.2188.

#### *N*-(*tert*-butyl)-2-ethyl-*N*,4-difluorobenzamide (4NF)

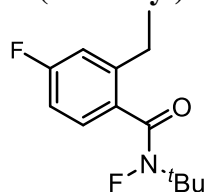

**<sup>1</sup>H NMR (300.1 MHz, CDCl<sub>3</sub>)** δ 7.33-7.26 (m, 1H), 6.98-6.87 (m, 2H), 2.74 (q, *J* = 7.6 Hz, 2H), 1.54 (d, *J* = 2.1 Hz, 9H), 1.24 (t, *J* = 7.6 Hz, 3H); **<sup>13</sup>C NMR (75 MHz, CDCl<sub>3</sub>)** δ 174.1 (d, *J* = 10.6 Hz), 163.6 (dd, *J* = 246.2 Hz, 1.4 Hz), 145.1 (dd, *J* = 7.6 Hz, 1.8 Hz), 130.6 (dd, *J* = 3.4 Hz, 0.8 Hz), 129.5 (dd, *J* = 8.1 Hz, 4.2 Hz), 115.7 (dd, *J* = 21.0 Hz, 1.3 Hz), 112.4 (dd, *J* = 21.0 Hz, 1.3 Hz), 64.4 (d, *J* = 10.5 Hz), 27.1 (d, *J* = 5.6 Hz), 26.0 (d, *J* = 1.8 Hz), 15.2; **<sup>19</sup>F NMR (282.4 MHz, CDCl<sub>3</sub>)** δ -63.2 (s), -116.9 – -117.0 (m). HRMS calcd for C<sub>26</sub>H<sub>34</sub>F<sub>4</sub>KN<sub>2</sub>O<sub>2</sub> (2M + K) 521.2193, found 521.2188.

***N*-(*tert*-butyl)-2-ethyl-*N*-fluoro-3-methylbenzamide (5NF)**

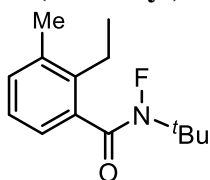

**<sup>1</sup>H NMR (300.1 MHz, CDCl<sub>3</sub>)** δ 7.34-7.14 (m, 3H), 2.73 (q, *J* = 7.6 Hz, 2H), 2.38 (s, 3H), 1.59 (d, *J* = 2.0 Hz, 9H), 1.21 (t, *J* = 7.6 Hz, 3H); **<sup>13</sup>C NMR (75 MHz, CDCl<sub>3</sub>)** δ 175.5 (d, *J* = 11.0 Hz), 139.4 (d, *J* = 2.2 Hz), 136.7 (d, *J* = 1.4 Hz), 135.4 (d, *J* = 1.1 Hz), 131.8, 125.3, 124.6 (d, *J* = 5.8 Hz), 64.2 (d, *J* = 10.2 Hz), 27.2 (d, *J* = 4.8 Hz), 23.4, 19.2 (d, *J* = 1.4 Hz), 14.5; **<sup>19</sup>F NMR (282.4 MHz, CDCl<sub>3</sub>)** δ -62.0 (s). HRMS calcd for C<sub>28</sub>H<sub>40</sub>F<sub>2</sub>KN<sub>2</sub>O<sub>2</sub> (2M + K) 513.2695, found 513.2689.

**2-ethyl-*N*-fluoro-*N*-(*tert*-pentyl)benzamide (6NF)**

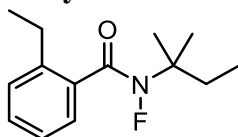

**<sup>1</sup>H NMR (300.1 MHz, CDCl<sub>3</sub>)** δ 7.35-7.21 (m, 4H), 2.74 (q, *J* = 7.6 Hz, 2H), 1.92 (q, *J* = 7.6 Hz, 2H), 1.53 (d, *J* = 1.9 Hz, 6H), 1.25 (t, *J* = 7.6 Hz, 3H), 1.03 (t, *J* = 7.6 Hz, 3H); **<sup>13</sup>C NMR (75 MHz, CDCl<sub>3</sub>)** δ 174.2 (d, *J* = 11.1 Hz), 141.4 (d, *J* = 2.2 Hz), 134.8 (d, *J* = 0.8 Hz), 129.9 (d, *J* = 1.4 Hz), 128.8 (d, *J* = 1.1 Hz), 127.0 (d, *J* = 4.2 Hz), 125.3 (d, *J* = 1.4 Hz), 67.3 (d, *J* = 9.8 Hz), 32.9 (d, *J* = 5.2 Hz), 26.1, 24.9 (d, *J* = 5.5 Hz), 15.6, 8.6; **<sup>19</sup>F NMR (282.4 MHz, CDCl<sub>3</sub>)** δ -64.7 (s). HRMS calcd for C<sub>28</sub>H<sub>40</sub>F<sub>2</sub>KN<sub>2</sub>O<sub>2</sub> (2M + K) 513.2695, found 513.2689.

***N*-(*tert*-butyl)-2-ethyl-*N*-fluoro-3-methoxybenzamide (7NF)**

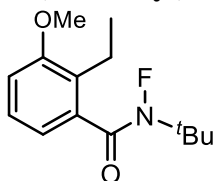

**<sup>1</sup>H NMR (300.1 MHz, CDCl<sub>3</sub>)** δ 7.21-7.12 (m, 1H), 6.90-6.87 (m, 2H), 3.84 (s, 3H), 2.69 (q, *J* = 7.6 Hz, 2H), 2.69 (d, *J* = 2.6 Hz, 9H), 1.21 (t, *J* = 7.6 Hz, 3H); **<sup>13</sup>C NMR (75 MHz, CDCl<sub>3</sub>)** δ 174.6 (d, *J* = 11.0 Hz), 157.5, 136.1, 130.1 (d, *J* = 2.2 Hz), 126.4 (d, *J* = 1.2 Hz), 118.7 (d, *J* = 3.8 Hz), 111.5 (d, *J* = 1.5 Hz), 64.3 (d, *J* = 11 Hz), 55.5, 27.2 (d, *J* = 5.4 Hz), 20.7, 14.4; **<sup>19</sup>F NMR (282.4 MHz, CDCl<sub>3</sub>)** δ -62.6 (s). HRMS calcd for C<sub>28</sub>H<sub>40</sub>F<sub>2</sub>KN<sub>2</sub>O<sub>4</sub> (2M + K) 545.2593, found 545.2602.

***N*-(*tert*-butyl)-*N*-fluoro-2-propylbenzamide (8NF)**

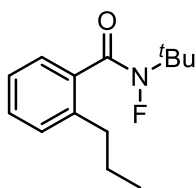

**<sup>1</sup>H NMR (300.1 MHz, CDCl<sub>3</sub>)** δ 7.36-7.30 (m, 2H), 7.25-7.18 (m, 2H), 2.68 (q, *J* = 7.6 Hz, 2H), 1.68-1.60 (m, 2H), 1.55 (d, *J* = 2.0 Hz, 9H), 0.95 (t, *J* = 7.6 Hz, 3H); **<sup>13</sup>C NMR (75 MHz, CDCl<sub>3</sub>)** δ 174.9 (d, *J* = 11.1 Hz), 140.1 (d, *J* = 2.2 Hz), 134.9 (d, *J* = 0.8 Hz), 129.8 (d, *J* = 1.4 Hz), 129.6 (d, *J* = 1.1 Hz), 127.2 (d, *J* = 4.4 Hz), 125.3 (d, *J* = 1.4 Hz), 64.2 (d, *J* = 9.6 Hz), 35.1, 27.1 (d, *J* = 5.3 Hz), 24.6, 14.0; **<sup>19</sup>F NMR (282.4 MHz, CDCl<sub>3</sub>)** δ -62.8 (s). RMS calcd for C<sub>28</sub>H<sub>40</sub>F<sub>2</sub>KN<sub>2</sub>O<sub>2</sub> (2M + K) 513.2695, found 513.2689.

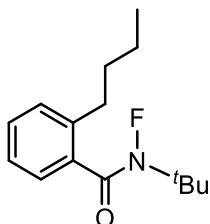

***N*-(*tert*-butyl)-2-butyl-*N*-fluorobenzamide (9NF)**

**<sup>1</sup>H NMR (300.1 MHz, CDCl<sub>3</sub>)** δ 7.34-7.30 (m, 2H), 7.25-7.21 (m, 2H), 2.71 (q, *J* = 7.6 Hz, 2H), 1.85-1.60 (m, 2H), 1.56 (d, *J* = 2.0 Hz, 9H), 1.43-1.31 (m, 2H), 0.95 (t, *J* = 7.6 Hz, 3H); **<sup>13</sup>C NMR (75 MHz, CDCl<sub>3</sub>)** δ 174.9 (d, *J* = 11.1 Hz), 140.3 (d, *J* = 2.2 Hz), 134.8 (d, *J* = 0.8 Hz), 129.8 (d, *J* = 1.4 Hz), 129.6 (d, *J* = 1.1 Hz), 127.2 (d, *J* = 4.4 Hz), 125.3 (d, *J* = 1.4 Hz), 64.3 (d, *J* = 9.6 Hz), 33.6, 32.8, 27.1 (d, *J* = 5.3 Hz), 22.7, 13.9; **<sup>19</sup>F NMR (282.4 MHz, CDCl<sub>3</sub>)** δ -62.8 (s). HRMS calcd for C<sub>30</sub>H<sub>44</sub>F<sub>2</sub>KN<sub>2</sub>O<sub>2</sub> (2M + K) 541.3008, found 541.3002.

**2-(but-3-en-1-yl)-*N*-(*tert*-butyl)-*N*-fluorobenzamide (10NF)**

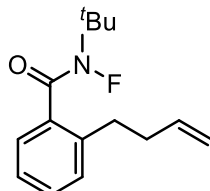

**<sup>1</sup>H NMR (300.1 MHz, CDCl<sub>3</sub>)** δ 7.38-7.24 (m, 4H), 5.93-5.84 (m, 1H), 5.10-4.99 (m, 2H), 2.87-2.82 (m, 2H), 2.44-2.39 (m, 2H), 1.57 (d, *J* = 2.0 Hz, 9H); **<sup>13</sup>C NMR (75 MHz, CDCl<sub>3</sub>)** δ 174.8 (d, *J* = 10.8 Hz), 139.3 (d, *J* = 2.2 Hz), 137.8, 134.9, 129.9, 129.7, 127.32 (d, *J* = 4.3 Hz), 125.6, 115.0, 64.2 (d, *J* = 10.2 Hz), 35.5, 32.6, 27.1 (d, *J* = 5.5 Hz); **<sup>19</sup>F NMR (282.4 MHz, CDCl<sub>3</sub>)** δ -62.8 (s). HRMS calcd for C<sub>30</sub>H<sub>40</sub>F<sub>2</sub>KN<sub>2</sub>O<sub>2</sub> (2M + K) 537.2695, found 537.2689.

***N*-(*tert*-butyl)-*N*-fluoro-2-methylbenzamide (11NF)**

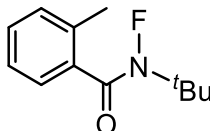

**<sup>1</sup>H NMR (300 MHz, CDCl<sub>3</sub>)** δ 7.36-7.31 (m, 2H), 7.28-7.23 (m, 2H), 2.43 (s, 3H), 1.57 (d, *J* = 2.2 Hz, 9H); **<sup>13</sup>C NMR (75 MHz, CDCl<sub>3</sub>)** δ 175.0 (d, *J* = 11.4 Hz), 135.4 (d, *J* = 2.4 Hz), 135.1 (d, *J* = 1.1 Hz), 130.4 (d, *J* = 1.1 Hz), 129.9 (d, *J* = 1.4 Hz), 127.2 (d, *J* = 4.5 Hz), 125.3 (d, *J* = 1.1 Hz), 64.4 (d, *J* = 10.4 Hz), 27.2 (d, *J* = 5.5 Hz), 19.3; **<sup>19</sup>F NMR (282 MHz, CDCl<sub>3</sub>)** δ -64.1 (s). HRMS calcd for C<sub>24</sub>H<sub>32</sub>F<sub>2</sub>KN<sub>2</sub>O<sub>2</sub> (2M + K) 457.2069, found 457.2076.

**4-bromo-*N*-(*tert*-butyl)-*N*-fluoro-2-methylbenzamide (12NF)**



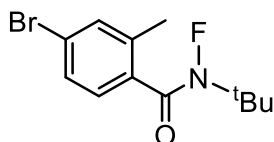

**<sup>1</sup>H NMR (300 MHz, CDCl<sub>3</sub>)** δ 7.40-7.36 (m, 2H), 7.28-7.23 (d, *J* = 8.2 Hz, 1H), 2.40 (s, 3H), 1.56 (d, *J* = 2.0 Hz, 9H); **<sup>13</sup>C NMR (75 MHz, CDCl<sub>3</sub>)** δ 173.9 (d, *J* = 11.2 Hz), 137.8 (d, *J* = 2.3 Hz), 133.9 (d, *J* = 1.0 Hz), 133.4, 128.8 (d, *J* = 4.5 Hz), 128.6 (d, *J* = 1.0 Hz), 124.1 (d, *J* = 1.1 Hz), 64.6 (d, *J* = 10.1 Hz), 27.1 (d, *J* = 5.2 Hz), 19.2; **<sup>19</sup>F NMR (282 MHz, CDCl<sub>3</sub>)** δ -63.9 (s). HRMS calcd for C<sub>24</sub>H<sub>30</sub>Br<sub>2</sub>F<sub>2</sub>KN<sub>2</sub>O<sub>2</sub> (2M + K) 615.0259, found 615.0266.

***N*-(*tert*-butyl)-*N*-fluoro-5-methoxy-2-methylbenzamide (13NF)**

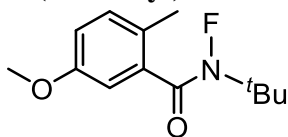

**<sup>1</sup>H NMR (300 MHz, CDCl<sub>3</sub>)** δ 7.14-7.11 (m, 1H), 6.90-6.86 (m, 2H), 3.81 (s, 3H), 2.34 (s, 3H), 1.57 (d, *J* = 2.1 Hz, 9H); **<sup>13</sup>C NMR (75 MHz, CDCl<sub>3</sub>)** δ 174.6 (d, *J* = 11.0 Hz), 157.2 (d, *J* = 1.0 Hz), 135.8 (d, *J* = 1.0 Hz), 131.4 (d, *J* = 1.0 Hz), 127.1 (d, *J* = 2.6 Hz), 115.9 (d, *J* = 1.5 Hz), 112.3 (d, *J* = 4.6 Hz), 64.4 (d, *J* = 10.1 Hz), 55.4, 27.2 (d, *J* = 5.4 Hz), 18.3; **<sup>19</sup>F NMR (282 MHz, CDCl<sub>3</sub>)** δ -64.5 (s). HRMS calcd for C<sub>26</sub>H<sub>36</sub>F<sub>2</sub>KN<sub>2</sub>O<sub>4</sub> (2M + K) 517.2280, found 517.2289.

***N*-(*tert*-butyl)-*N*,5-difluoro-2-methylbenzamide (14NF)**

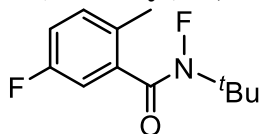

**<sup>1</sup>H NMR (300 MHz, CDCl<sub>3</sub>)** δ 7.28-7.16 (m, 1H), 7.07-6.99 (m, 2H), 2.37 (s, 3H), 1.57 (d, *J* = 2.0 Hz, 9H); **<sup>13</sup>C NMR (75 MHz, CDCl<sub>3</sub>)** δ 173.4 (dd, *J* = 11.0 Hz, *J* = 2.4 Hz), 159.4 (dd, *J* = 245.0 Hz, *J* = 1.5 Hz), 136.3 (d, *J* = 7.6 Hz), 131.9 (dd, *J* = 7.6 Hz, *J* = 1.0 Hz), 130.9 (dd, *J* = 3.6 Hz, *J* = 2.5 Hz), 116.7 (dd, *J* = 21.0 Hz, *J* = 1.2 Hz), 114.1 (dd, *J* = 23.2 Hz, *J* = 4.5 Hz), 64.5 (d, *J* = 10.4 Hz), 27.1 (d, *J* = 5.2 Hz), 18.5; **<sup>19</sup>F NMR (282 MHz, CDCl<sub>3</sub>)** δ -64.6 (s), -116.9 – -117.0 (m). HRMS calcd for C<sub>24</sub>H<sub>30</sub>F<sub>4</sub>KN<sub>2</sub>O<sub>2</sub> (2M + K) 493.1880, found 493.1890.

***N*-(*tert*-butyl)-*N*-fluoro-2-isopropylbenzamide (15NF)**

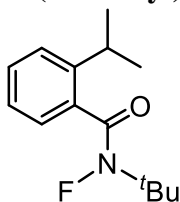

**<sup>1</sup>H NMR (300 MHz, CDCl<sub>3</sub>)** δ 7.44-7.37 (m, 2H), 7.30-7.20 (m, 2H), 3.26-3.12 (m, 1H), 1.59 (d, *J* = 2.0 Hz, 9H), 1.29 (d, *J* = 7.0 Hz, 6H); **<sup>13</sup>C NMR (75 MHz, CDCl<sub>3</sub>)** δ 175.1 (d, *J* = 11.4 Hz), 145.9 (d, *J* = 2.5 Hz), 134.4, 129.9 (d, *J* = 1.2 Hz), 126.6 (d, *J* = 4.0 Hz), 125.6 (d, *J* = 1.2 Hz), 125.3 (d, *J* = 1.2 Hz), 64.4 (d, *J* = 10.6 Hz), 30.3, 27.2 (d, *J* = 6.0 Hz), 23.9; **<sup>19</sup>F NMR (282 MHz, CDCl<sub>3</sub>)** δ -62.2 (s). HRMS calcd for C<sub>28</sub>H<sub>40</sub>F<sub>2</sub>KN<sub>2</sub>O<sub>2</sub> (2M + K) 513.2695, found 513.2689.

***N*-(*tert*-butyl)-*N*,5-difluoro-2-isopropylbenzamide (16NF)**

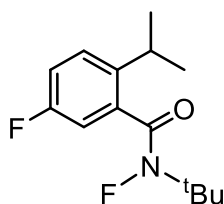

**<sup>1</sup>H NMR (300 MHz, CDCl<sub>3</sub>)** δ 7.33-7.26 (m, 1H), 7.10-7.04 (m, 1H), 6.97-6.93 (m, 1H), 3.18-3.04 (m, 1H), 1.56 (d, *J* = 2.0 Hz, 9H), 1.23 (d, *J* = 7.2 Hz, 6H); **<sup>13</sup>C NMR (75 MHz, CDCl<sub>3</sub>)** δ 173.4 (dd, *J* = 11.4 Hz, *J* = 2.4 Hz), 160.2 (dd, *J* = 246.0 Hz, *J* = 1.5 Hz), 141.6 (dd, *J* = 3.4 Hz, *J* = 2.4 Hz), 135.6 (dd, *J* = 6.8 Hz, *J* = 1.2 Hz), 127.4 (dd, *J* = 7.6 Hz, *J* = 1.2 Hz), 116.9 (dd, *J* = 20.8 Hz, *J* = 1.2 Hz), 113.4 (dd, *J* = 23.4 Hz, *J* = 4.5 Hz), 64.6 (d, *J* = 10.1 Hz), 29.9, 27.1 (d, *J* = 5.0 Hz), 24.1; **<sup>19</sup>F NMR (282 MHz, CDCl<sub>3</sub>)** δ -62.6 (s), -116.8 – -116.9 (m). HRMS calcd for C<sub>28</sub>H<sub>38</sub>F<sub>4</sub>KN<sub>2</sub>O<sub>2</sub> (2M + K) 549.2506, found 549.2514.

### ***N*-fluoro-2-isopropyl-*N*-(*tert*-pentyl)benzamide (17NF)**

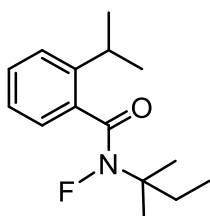

**<sup>1</sup>H NMR (300 MHz, CDCl<sub>3</sub>)** δ 7.41-7.34 (m, 2H), 7.26-7.19 (m, 2H), 3.21-3.12 (m, 1H), 1.96-1.88 (m, 2H), 1.53 (d, *J* = 2.2 Hz, 6H), 1.26 (d, *J* = 6.4 Hz, 6H), 1.29 (t, *J* = 7.5 Hz, 3H); **<sup>13</sup>C NMR (75 MHz, CDCl<sub>3</sub>)** δ 174.3 (d, *J* = 11.2 Hz), 145.8 (d, *J* = 2.4 Hz), 134.5, 129.9 (d, *J* = 1.2 Hz), 126.5 (d, *J* = 4.0 Hz), 125.6 (d, *J* = 1.2 Hz), 125.3 (d, *J* = 1.2 Hz), 67.4 (d, *J* = 10.6 Hz), 32.9 (d, *J* = 4.6 Hz), 30.4, 24.9 (d, *J* = 6.0 Hz), 24.0, 8.6; **<sup>19</sup>F NMR (282 MHz, CDCl<sub>3</sub>)** δ -64.0 (s). HRMS calcd for C<sub>30</sub>H<sub>44</sub>F<sub>2</sub>KN<sub>2</sub>O<sub>2</sub> (2M + K) 541.3008, found 541.3016.

## **VI. Synthesis and Characterization of Authentic Azidation Products**

Racemic standard references of azidation products were prepared *via* an iron-catalyzed C–H azidation reaction reported previously (5). Namely, a 40 mL vial with screw cap and PTFE septum was charged with a stir bar, Fe(OAc)<sub>2</sub> (17 mg, 0.1 mmol), and 1,10-phenanthroline (18 mg, 0.1 mmol). The vial was evacuated and backfilled with Ar for three times. *N*-fluoroamide substrate (1 mmol) and trimethylsilyl azide (TMSN<sub>3</sub>) were dissolved in 10 mL dichloroethane and the resulting solution was added to the 40 mL vial containing the catalyst and the ligand. The vial was capped and the reaction mixture was stirred under 80 °C for 24 hours. The crude reaction mixture was purified by semi-prep HPLC with water and acetonitrile as the mobile phases.

### **2-(1-azidoethyl)-*N*-(*tert*-butyl)benzamide (1N)**

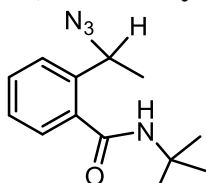

**<sup>1</sup>H NMR (300 MHz, CDCl<sub>3</sub>)** δ 7.53-7.30 (m, 4H), 5.78 (brs, 1H), 5.17 (q, *J* = 6.8 Hz, 1H), 1.60 (d, *J* = 6.8 Hz, 3H), 1.49 (s, 9H); **<sup>13</sup>C NMR (75 MHz, CDCl<sub>3</sub>)** δ 168.8, 139.1, 136.8,

130.2, 127.8, 126.8, 126.6, 57.4, 52.1, 28.8, 21.4. HRMS calcd for C<sub>26</sub>H<sub>36</sub>KN<sub>8</sub>O<sub>2</sub> (2M + K) 531.2598, found 531.2593.

### 2-(1-azidoethyl)-*N*-(*tert*-butyl)-5-methylbenzamide (2N)

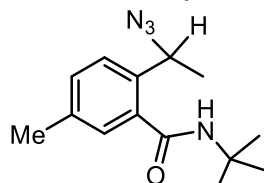

<sup>1</sup>H NMR (300 MHz, CDCl<sub>3</sub>) δ 7.39 (d, *J* = 8.2 Hz, 1H), 7.26 (dd, *J* = 8.2 Hz, *J* = 1.8 Hz, 1H), 7.19 (d, *J* = 1.8 Hz, 1H), 5.79 (brs, 1H), 5.10 (q, *J* = 6.8 Hz, 1H), 2.37 (s, 3H), 1.57 (d, *J* = 6.8 Hz, 3H), 1.49 (s, 9H); <sup>13</sup>C NMR (75 MHz, CDCl<sub>3</sub>) δ 168.8, 139.1, 136.8, 130.2, 127.8, 126.8, 126.6, 57.4, 52.1, 28.8, 21.4. HRMS calcd for C<sub>28</sub>H<sub>40</sub>KN<sub>8</sub>O<sub>2</sub> (2M + K) 559.2911, found 559.2906.

### 2-(1-azidoethyl)-*N*-(*tert*-butyl)-5-fluorobenzamide (3N)

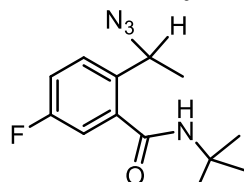

<sup>1</sup>H NMR (300 MHz, CDCl<sub>3</sub>) δ 7.51-7.47 (m, 1H), 7.18-7.08 (m, 2H), 5.78 (brs, 1H), 5.10 (q, *J* = 6.4 Hz, 1H), 1.58 (d, *J* = 6.4 Hz, 3H), 1.49 (s, 9H); <sup>13</sup>C NMR (75 MHz, CDCl<sub>3</sub>) δ 167.3, 161.7 (d, *J* = 247.2 Hz), 138.6 (d, *J* = 6.8 Hz), 134.8 (d, *J* = 4.5 Hz), 128.7 (d, *J* = 8.2 Hz), 117.1 (d, *J* = 21.6 Hz), 114.0 (d, *J* = 23.0 Hz), 56.9, 52.3, 28.7, 21.3; <sup>19</sup>F NMR (282.4 MHz, CDCl<sub>3</sub>) δ -112.5 – -112.6 (m). HRMS calcd for C<sub>26</sub>H<sub>34</sub>F<sub>2</sub>KN<sub>8</sub>O<sub>2</sub> (2M + K) 567.2410, found 567.2404.

### 2-(1-azidoethyl)-*N*-(*tert*-butyl)-4-fluorobenzamide (4N)

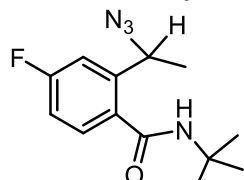

<sup>1</sup>H NMR (300 MHz, CDCl<sub>3</sub>) δ 7.41-7.36 (m, 1H), 7.24-7.20 (m, 1H), 7.04-6.98 (m, 1H), 5.74 (brs, 1H), 5.20 (q, *J* = 6.3 Hz, 1H), 1.58 (d, *J* = 6.3 Hz, 3H), 1.49 (s, 9H). <sup>13</sup>C NMR (75 MHz, CDCl<sub>3</sub>) δ 167.9, 163.6 (d, *J* = 247.5 Hz), 142.5 (d, *J* = 6.8 Hz), 132.8 (d, *J* = 4.4 Hz), 129.0 (d, *J* = 8.7 Hz), 114.7 (d, *J* = 21.5 Hz), 113.9 (d, *J* = 23.0 Hz), 57.0, 52.2, 28.8, 21.4; <sup>19</sup>F NMR (282.4 MHz, CDCl<sub>3</sub>) δ -108.5 – -108.6 (m). HRMS calcd for C<sub>26</sub>H<sub>34</sub>F<sub>2</sub>KN<sub>8</sub>O<sub>2</sub> (2M + K) 567.2410, found 567.2404.

### 2-(1-azidoethyl)-*N*-(*tert*-butyl)-3-methylbenzamide (5N)

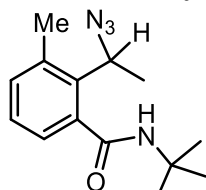

<sup>1</sup>H NMR (300 MHz, CDCl<sub>3</sub>) δ 7.28-7.18 (m, 3H), 5.67 (brs, 1H), 5.18 (q, *J* = 6.8 Hz, 1H), 2.48 (s, 2H), 1.65 (d, *J* = 6.8 Hz, 3H), 1.49 (s, 9H); <sup>13</sup>C NMR (75 MHz, CDCl<sub>3</sub>) δ 170.1, 138.5,

136.9, 135.9, 132.8, 127.5, 125.0, 58.2, 51.9, 28.8, 20.2, 19.8. HRMS calcd for C<sub>28</sub>H<sub>40</sub>KN<sub>8</sub>O<sub>2</sub> (2M + K) 559.2911, found 559.2906.

### 2-(1-azidoethyl)-*N*-(*tert*-pentyl)benzamide (6N)

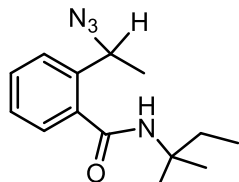

<sup>1</sup>H NMR (300 MHz, CDCl<sub>3</sub>) δ 7.44-7.28 (m, 4H), 5.53 (brs, 1H), 1.87 (q, *J* = 8.4 Hz, 2H), 1.80 (s, 6H), 0.99 (t, *J* = 8.4 Hz, 3H); <sup>13</sup>C NMR (75 MHz, CDCl<sub>3</sub>) δ 170.8, 141.9, 137.6, 129.2, 128.7, 127.4, 126.1, 64.3, 54.6, 33.1, 28.6, 26.1, 8.4. HRMS calcd for C<sub>28</sub>H<sub>40</sub>KN<sub>8</sub>O<sub>2</sub> (2M + K) 559.2911, found 559.2906.

### 2-(1-azidoethyl)-*N*-(*tert*-butyl)-3-methoxybenzamide (7N)

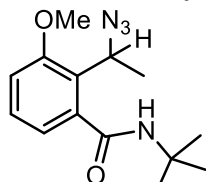

<sup>1</sup>H NMR (300 MHz, CDCl<sub>3</sub>) δ 7.30-7.25 (m, 1H), 6.98-6.90 (m, 2H), 5.69 (brs, 1H), 5.07 (q, *J* = 6.8 Hz, 1H), 3.90 (s, 3H), 1.70 (d, *J* = 6.8 Hz, 3H), 1.48 (s, 9H); <sup>13</sup>C NMR (75 MHz, CDCl<sub>3</sub>) δ 169.0, 158.0, 139.3, 128.9, 126.3, 119.3, 122.3, 55.7, 55.5, 52.0, 28.7, 18.9. HRMS calcd for C<sub>28</sub>H<sub>40</sub>KN<sub>8</sub>O<sub>4</sub> (2M + K) 591.2810, found 591.2819.

### 2-(1-azidopropyl)-*N*-(*tert*-butyl)benzamide (8N)

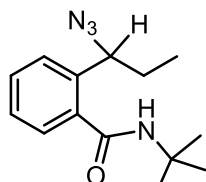

<sup>1</sup>H NMR (300 MHz, CDCl<sub>3</sub>) δ 7.48-7.30 (m, 4H), 5.74 (brs, 1H), 4.93 (t, *J* = 7.2 Hz, 1H), 1.94-1.84 (m, 2H), 1.50 (s, 9H), 0.99 (d, *J* = 7.0 Hz, 3H); <sup>13</sup>C NMR (75 MHz, CDCl<sub>3</sub>) δ 168.8, 137.9, 137.4, 130.1, 127.8, 126.9, 126.8, 63.7, 52.1, 29.1, 28.8, 10.9. HRMS calcd for C<sub>28</sub>H<sub>40</sub>KN<sub>8</sub>O<sub>2</sub> (2M + K) 559.2911, found 559.2906.

### 2-(1-azidobutyl)-*N*-(*tert*-butyl)benzamide (9N)

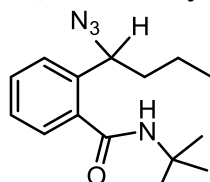

<sup>1</sup>H NMR (300 MHz, CDCl<sub>3</sub>) δ 7.48-7.33 (m, 4H), 5.76 (brs, 1H), 5.03-4.98 (m, 1H), 1.87-1.79 (m, 2H), 1.51 (s, 9H), 1.54-1.27 (m, 2H), 0.95 (t, *J* = 7.2 Hz, 3H); <sup>13</sup>C NMR (75 MHz, CDCl<sub>3</sub>) δ 168.8, 138.1, 137.3, 130.1, 127.8, 126.9, 126.8, 61.9, 52.1, 37.9, 28.8, 19.6, 13.7. HRMS calcd for C<sub>30</sub>H<sub>44</sub>KN<sub>8</sub>O<sub>2</sub> (2M + K) 587.3224, found 587.3219.

### 2-(1-azidobut-3-en-1-yl)-*N*-(*tert*-butyl)benzamide (10N)

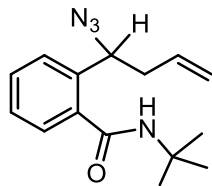

$^1\text{H NMR}$  (300 MHz,  $\text{CDCl}_3$ )  $\delta$  7.52-7.28 (m, 4H), 5.86-5.74 (m, 1H), 5.19-5.10 (m, 3H), 2.65-2.60 (m, 2H), 1.49 (s, 9H);  $^{13}\text{C NMR}$  (75 MHz,  $\text{CDCl}_3$ )  $\delta$  168.7, 137.5, 137.1, 133.8, 130.2, 127.9, 127.1, 126.8, 118.3, 61.6, 52.1, 40.3, 28.8. HRMS calcd for  $\text{C}_{30}\text{H}_{40}\text{KN}_8\text{O}_2$  (2M + K) 583.2911, found 583.2920.

### 2-(azidomethyl)-*N*-(*tert*-butyl)benzamide (11N)

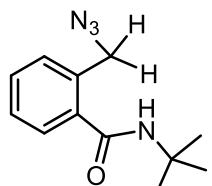

$^1\text{H NMR}$  (300 MHz,  $\text{CDCl}_3$ )  $\delta$  7.51-7.35 (m, 4H), 5.92 (brs, 1H), 4.59 (s, 2H), 1.50 (s, 9H);  $^{13}\text{C NMR}$  (75 MHz,  $\text{CDCl}_3$ )  $\delta$  168.3, 137.4, 133.3, 130.2, 130.0, 128.5, 127.5, 52.7, 52.1, 28.8. HRMS calcd for  $\text{C}_{24}\text{H}_{32}\text{KN}_8\text{O}_2$  (2M + K) 503.2285, found 503.2292.

### 2-(azidomethyl)-4-bromo-*N*-(*tert*-butyl)benzamide (12N)

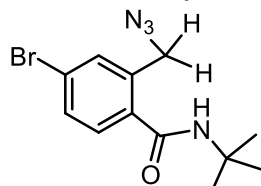

$^1\text{H NMR}$  (300 MHz,  $\text{CDCl}_3$ )  $\delta$  7.57-7.49 (m, 2H), 7.36-7.28 (m, 1H), 5.86 (brs, 1H), 4.58 (s, 2H), 1.49 (s, 9H);  $^{13}\text{C NMR}$  (75 MHz,  $\text{CDCl}_3$ )  $\delta$  167.38, 135.99, 135.78, 132.72, 131.41, 128.96, 124.27, 52.73, 52.28, 52.15, 28.76. HRMS calcd for  $\text{C}_{24}\text{H}_{30}\text{Br}_2\text{KN}_8\text{O}_2$  (2M + K) 661.0475, found 661.0483.

### 2-(azidomethyl)-*N*-(*tert*-butyl)-5-methoxybenzamide (13N)

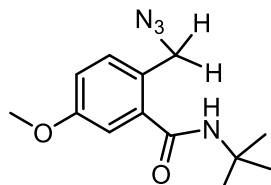

$^1\text{H NMR}$  (300 MHz,  $\text{CDCl}_3$ )  $\delta$  7.70 (d,  $J = 8.6$  Hz, 1H), 7.04 (d,  $J = 2.8$  Hz, 1H), 6.95 (dd,  $J = 8.6$  Hz,  $J = 2.8$  Hz, 1H), 5.99 (brs, 1H), 4.49 (s, 2H), 3.86 (s, 3H), 1.49 (s, 9H).  $^{13}\text{C NMR}$  (75 MHz,  $\text{CDCl}_3$ )  $\delta$  168.0, 159.6, 139.0, 131.8, 124.9, 115.3, 113.5, 55.5, 52.5, 52.1, 28.8. HRMS calcd for  $\text{C}_{26}\text{H}_{36}\text{KN}_8\text{O}_4$  (2M + K) 563.2497, found 563.2503.

### 2-(azidomethyl)-*N*-(*tert*-butyl)-5-fluorobenzamide (14N)

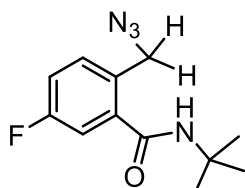

**<sup>1</sup>H NMR (300 MHz, CDCl<sub>3</sub>)** δ 7.38-7.34 (m, 1H), 7.23-7.19 (m, 1H), 7.16-7.10 (m, 1H), 5.93 (brs, 1H), 4.54 (s, 2H), 1.50 (s, 9H). **<sup>13</sup>C NMR (75 MHz, CDCl<sub>3</sub>)** δ 166.90 (d, *J* = 2.2 Hz), 162.23 (d, *J* = 249.2 Hz), 139.36 (d, *J* = 6.8 Hz), 132.06 (d, *J* = 8.2 Hz), 129.11 (d, *J* = 3.4 Hz), 116.97 (d, *J* = 21.2 Hz), 114.98 (d, *J* = 22.2 Hz), 52.35, 52.11, 28.73. **<sup>19</sup>F NMR (282.4 MHz, CDCl<sub>3</sub>)** δ -113.0 – -113.1 (m). HRMS calcd for C<sub>24</sub>H<sub>30</sub>F<sub>2</sub>KN<sub>8</sub>O<sub>2</sub> (2M + K) 539.2097, found 539.2091.

**2-(2-azidopropan-2-yl)-N-(tert-butyl)benzamide (15N)**

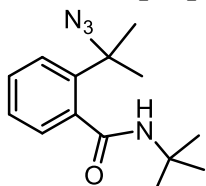

**<sup>1</sup>H NMR (300 MHz, CDCl<sub>3</sub>)** δ 7.43-7.28 (m, 4H), 5.64 (brs, 1H), 1.80 (s, 6H), 1.50 (s, 9H); **<sup>13</sup>C NMR (75 MHz, CDCl<sub>3</sub>)** δ 170.8, 141.9, 137.5, 129.2, 128.7, 127.4, 126.1, 64.3, 51.8, 28.6, 28.6. HRMS calcd for C<sub>28</sub>H<sub>40</sub>KN<sub>8</sub>O<sub>2</sub> (2M + K) 559.2911, found 559.2920.

**2-(2-azidopropan-2-yl)-N-(tert-butyl)-5-fluorobenzamide (16N)**

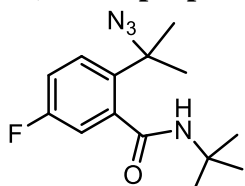

**<sup>1</sup>H NMR (300 MHz, CDCl<sub>3</sub>)** δ 7.41-7.37 (m, 1H), 7.08-7.01 (m, 2H), 5.63 (brs, 1H), 1.78 (s, 6H), 1.49 (s, 9H). **<sup>13</sup>C NMR (75 MHz, CDCl<sub>3</sub>)** δ 169.2, 161.3 (d, *J* = 247.2 Hz), 139.3 (d, *J* = 7.8 Hz), 137.7 (d, *J* = 4.6 Hz), 128.2 (d, *J* = 7.8 Hz), 115.9 (d, *J* = 6.4 Hz), 115.6 (d, *J* = 4.6 Hz), 63.9, 51.9, 28.6, 28.6. **<sup>19</sup>F NMR (282.4 MHz, CDCl<sub>3</sub>)** δ -114.2 – -114.3 (m). HRMS calcd for C<sub>28</sub>H<sub>38</sub>F<sub>2</sub>KN<sub>8</sub>O<sub>2</sub> (2M + K) 595.2723, found 595.2726.

**2-(2-azidopropan-2-yl)-N-(tert-pentyl)benzamide (17N)**

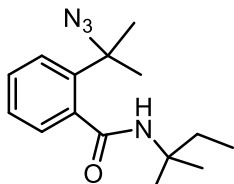

**<sup>1</sup>H NMR (300 MHz, CDCl<sub>3</sub>)** δ 7.44-7.28 (m, 4H), 5.53 (brs, 1H), 1.87 (q, *J* = 8.4 Hz, 2H), 1.80 (s, 6H), 0.99 (t, *J* = 8.4 Hz, 3H). **<sup>13</sup>C NMR (75 MHz, CDCl<sub>3</sub>)** δ 170.8, 141.9, 137.6, 129.2, 128.7, 127.4, 126.1, 64.3, 54.6, 33.1, 28.6, 26.1, 8.4. HRMS calcd for C<sub>30</sub>H<sub>44</sub>KN<sub>8</sub>O<sub>2</sub> (2M + K) 587.3224, found 587.3228.

**N-(tert-butyl)-2-((4-(((8R,9S,13S,14S)-13-methyl-17-oxo-7,8,9,11,12,13,14,15,16,17-decahydro-6H-cyclopenta[a]phenanthren-3-yl)oxy)methyl)-1H-1,2,3-triazol-1-yl)methyl)benzamide (19)**

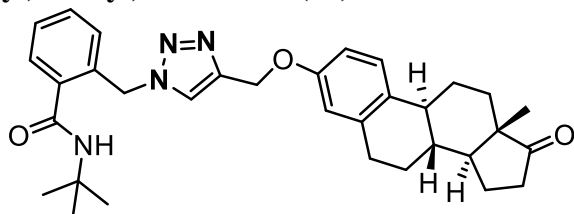

**<sup>1</sup>H NMR (300 MHz, CDCl<sub>3</sub>)** δ 7.92 (s, 1H), 7.45-7.35 (m, 4H), 7.22-7.19 (m, 1H), 6.81-6.73 (m, 2H), 5.97 (brs, 1H), 5.74 (s, 2H), 5.16 (s, 2H), 2.93-2.88 (m, 2H), 2.57-2.33 (m, 2H), 2.19-1.95 (m, 6H), 1.71-1.39 (m, 14H), 0.92 (s, 3H). **<sup>13</sup>C NMR (75 MHz, CDCl<sub>3</sub>)** δ 220.9, 168.4, 156.3, 144.2, 137.9, 136.9, 133.1, 133.0, 132.6, 130.7, 128.9, 127.2, 126.4, 124.0, 114.8, 112.4, 62.0, 52.2, 51.3, 50.4, 48.0, 44.0, 38.3, 35.9, 31.6, 29.7, 28.8, 26.5, 25.9, 21.6, 13.9.

## VII. GC-MS Standard Curves for Azidation Products

Product formation in enzymatic reactions was quantified by GC-MS based on standard curves. To determine the standard calibration curves, stock solutions of chemically synthesized azidation products were prepared at various concentrations (0.5 – 5.0 mM in 4:6 hexanes/EtOAc) with added internal standard 1,2,3-trimethoxybenzene with a final concentration of 0.5 mM in the stock solutions of azidation products. All data points represent the average of quadruplicate runs. The standard curves plot product concentration in mM (y-axis) against the ratio of product area to internal standard area on GC-MS (x-axis). Mass spectrum of the azide compound was added below the calibration curve.

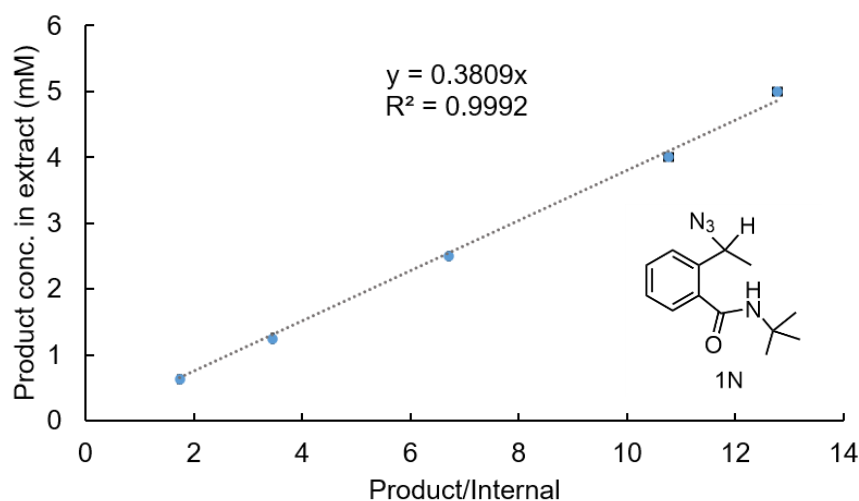

MS Spectrum

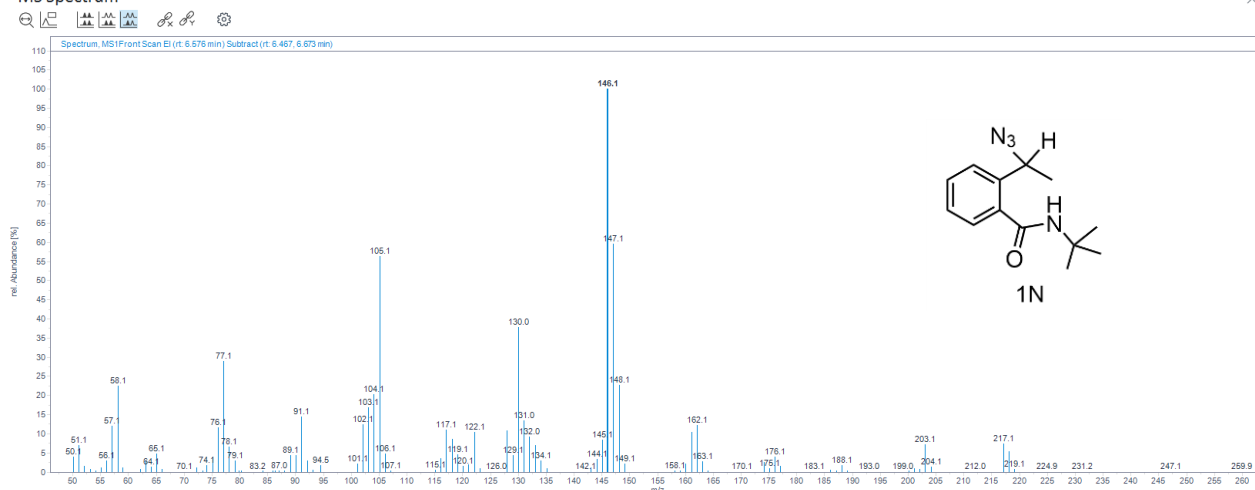



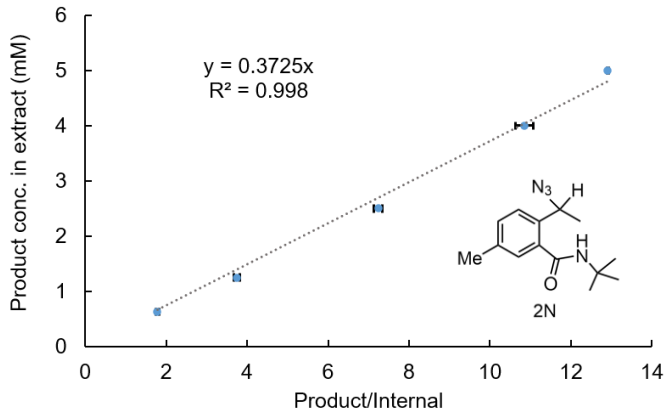

MS Spectrum

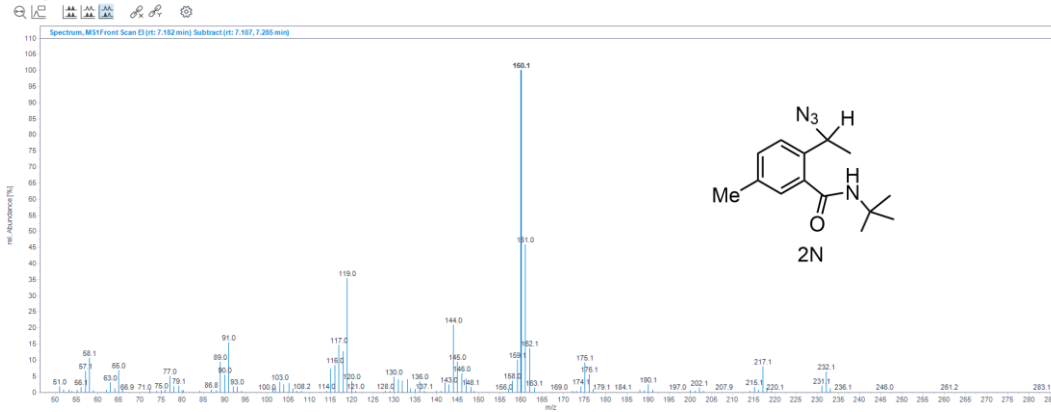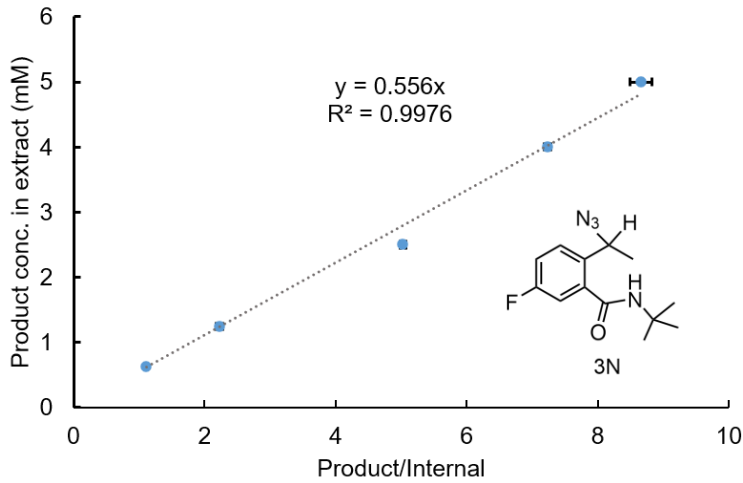

MS Spectrum

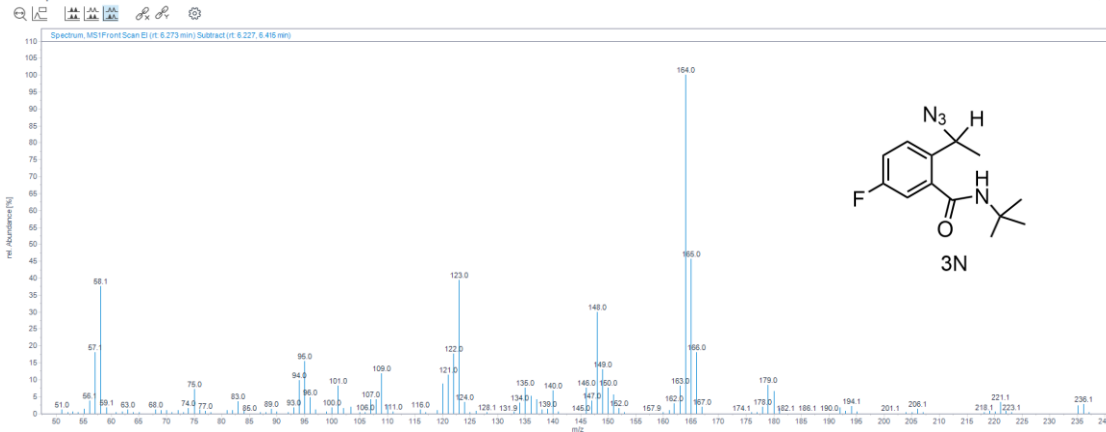

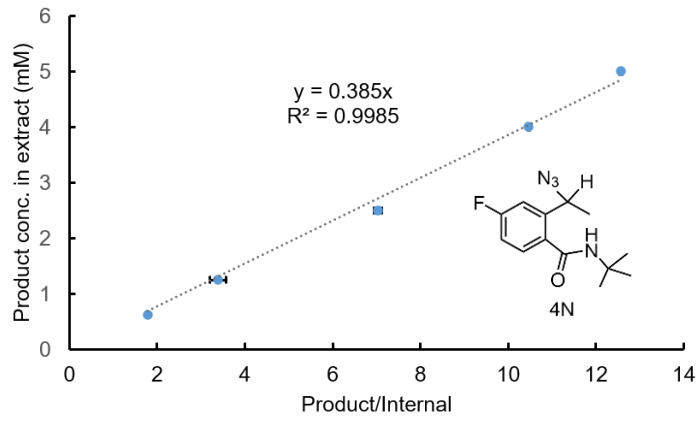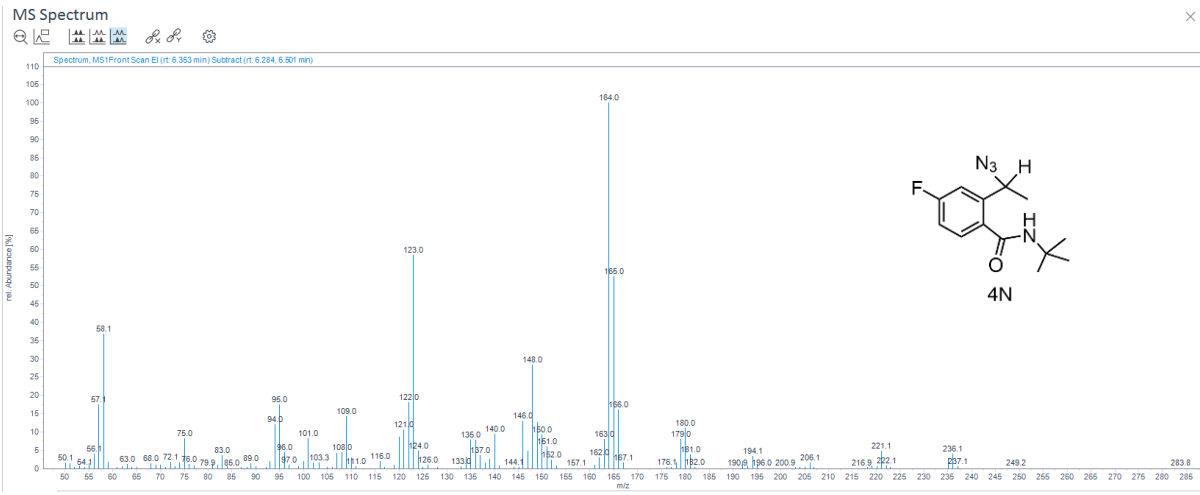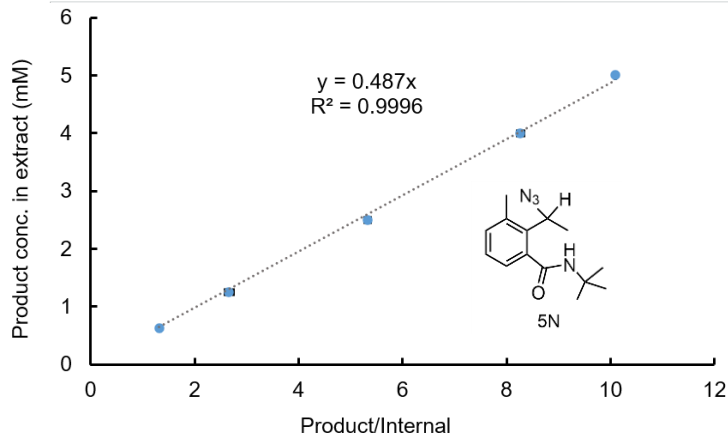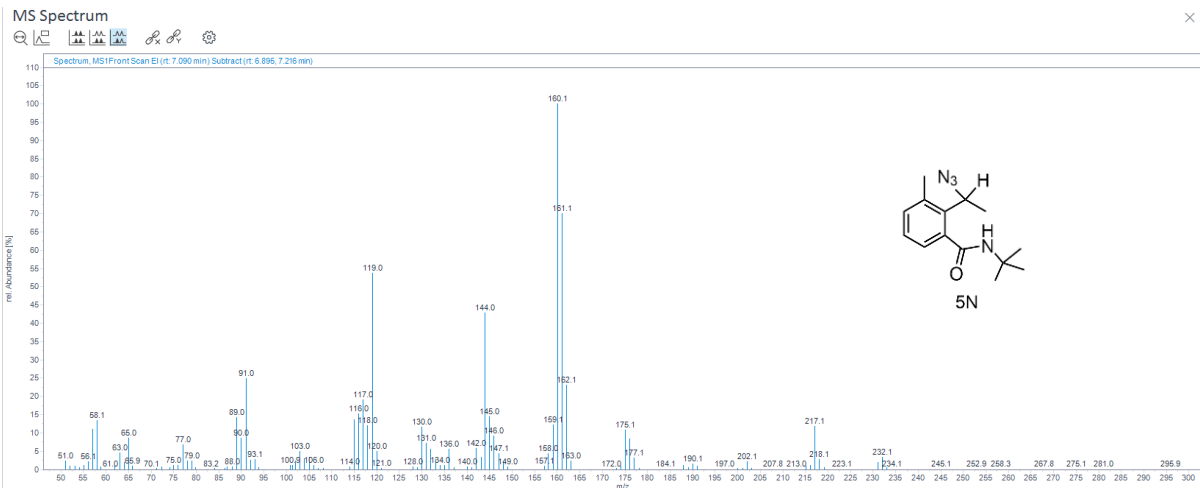

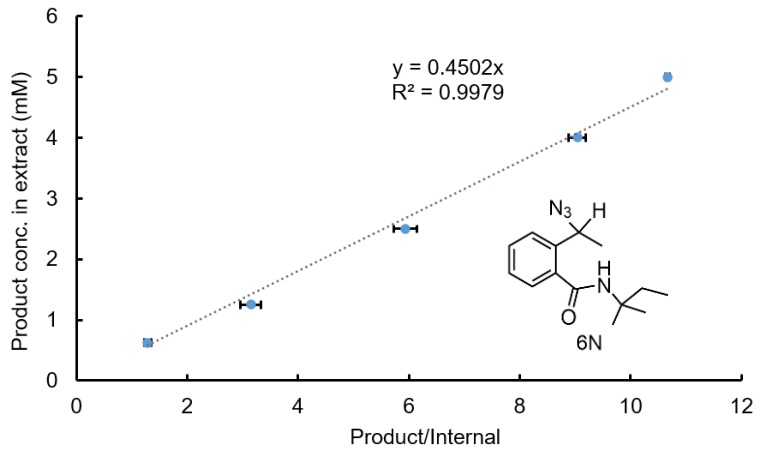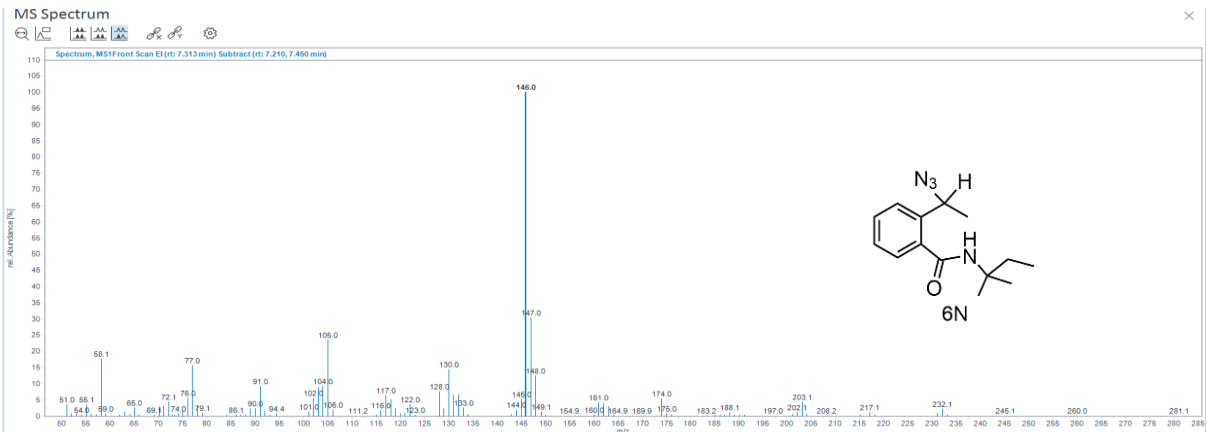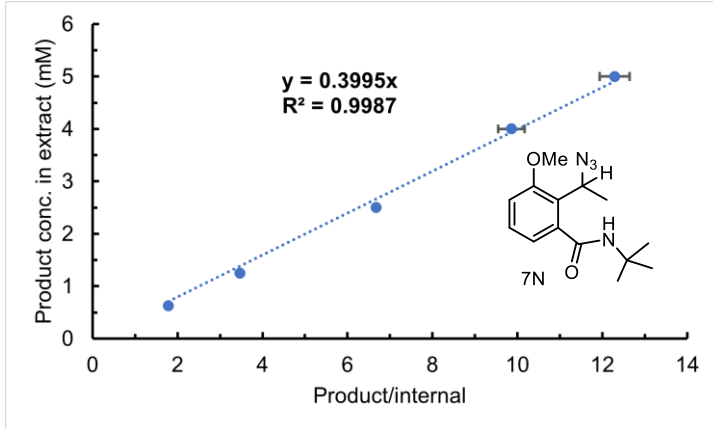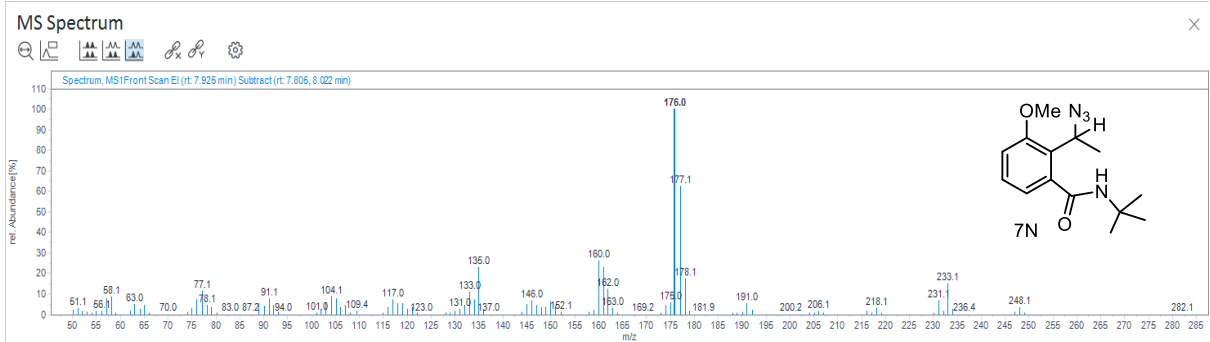

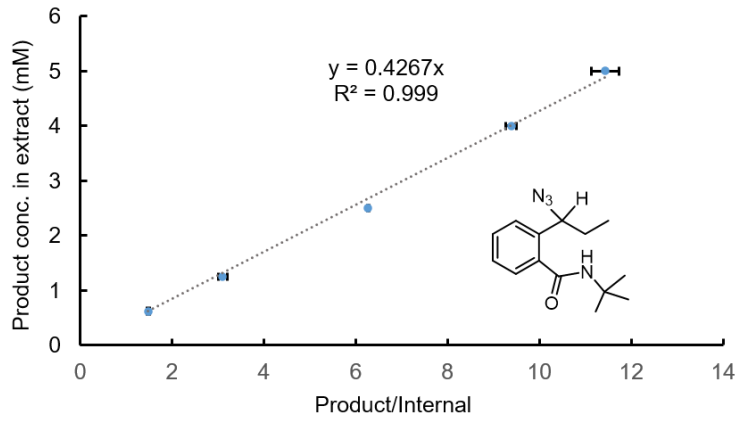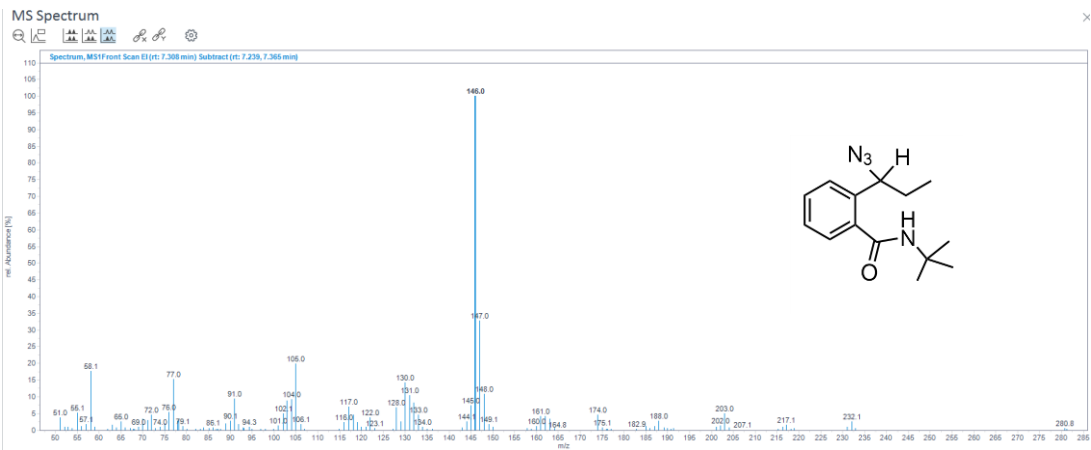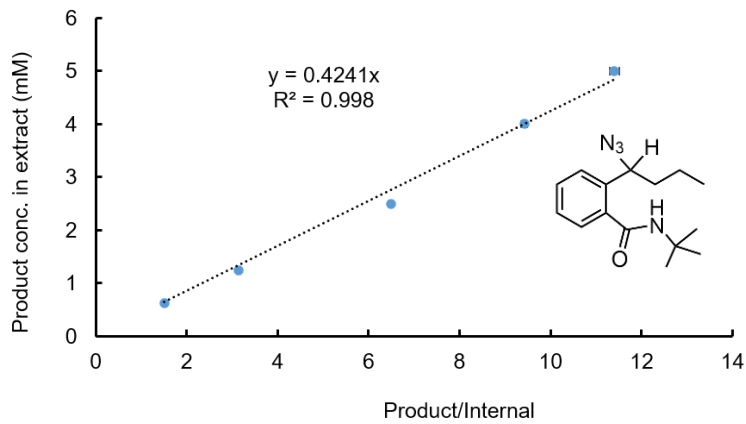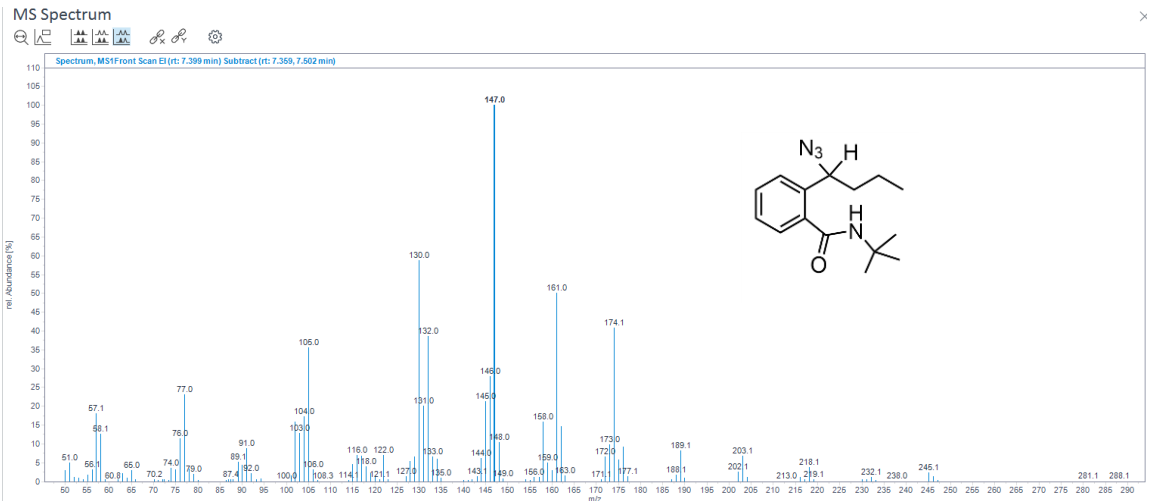

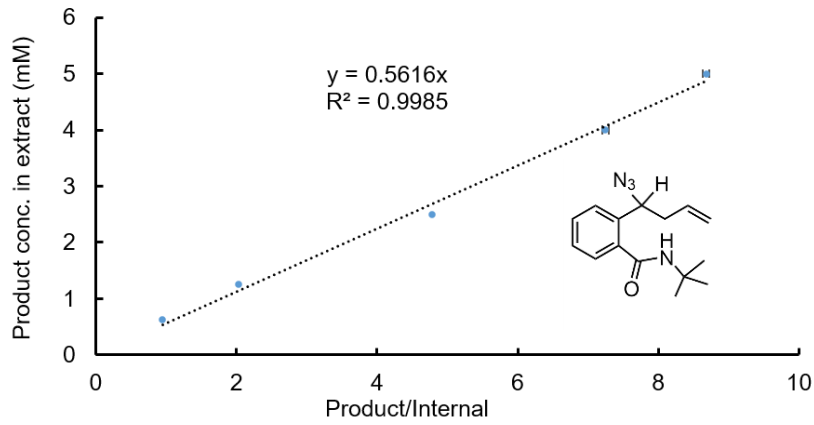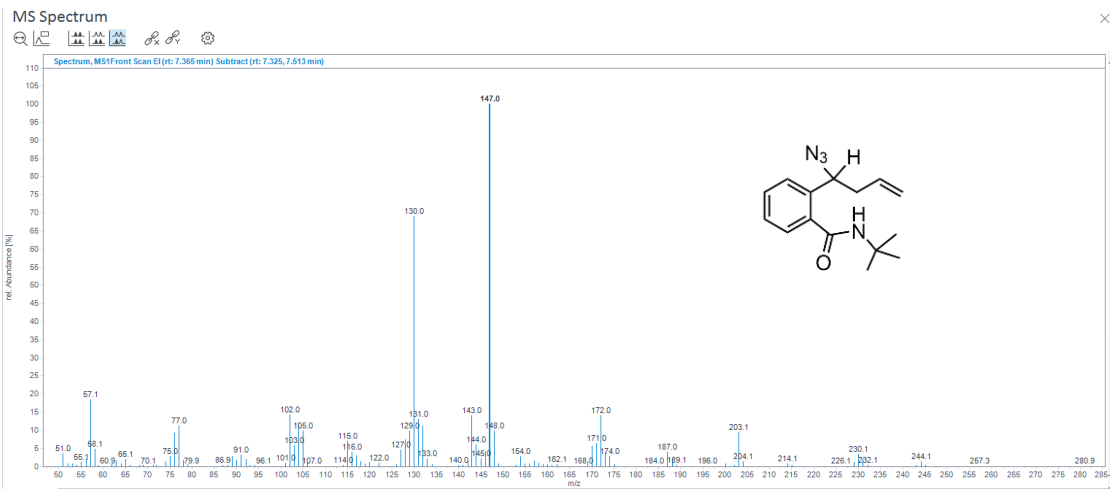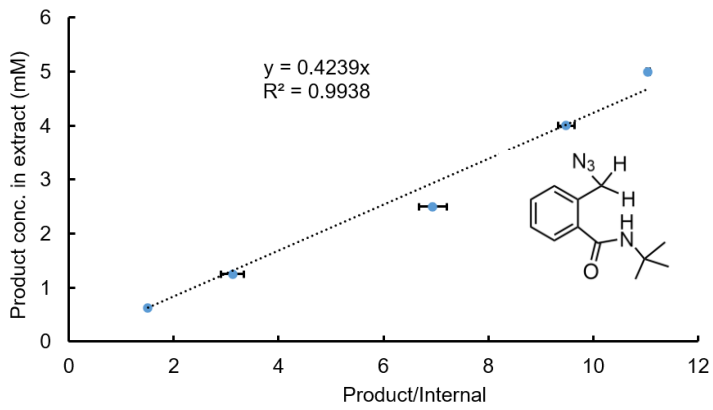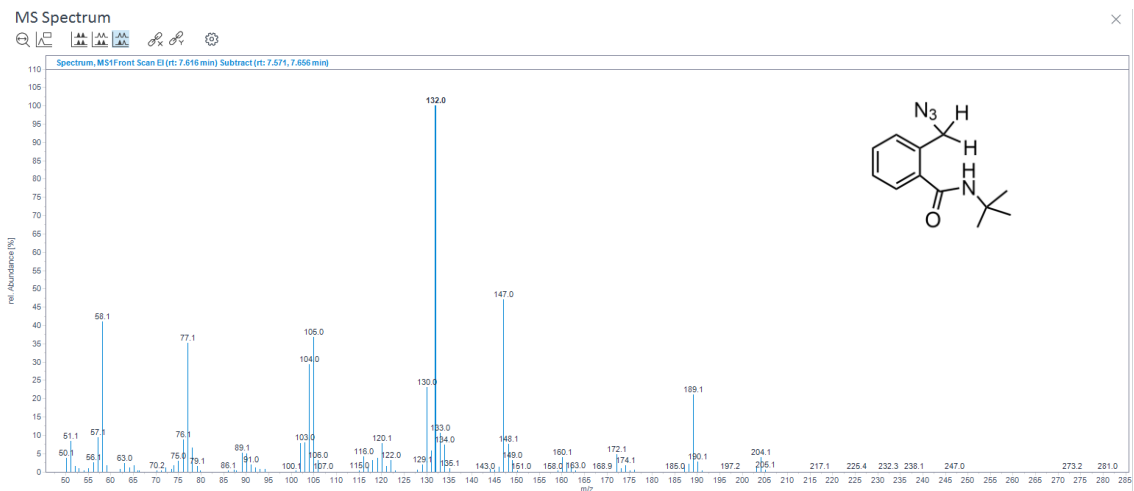

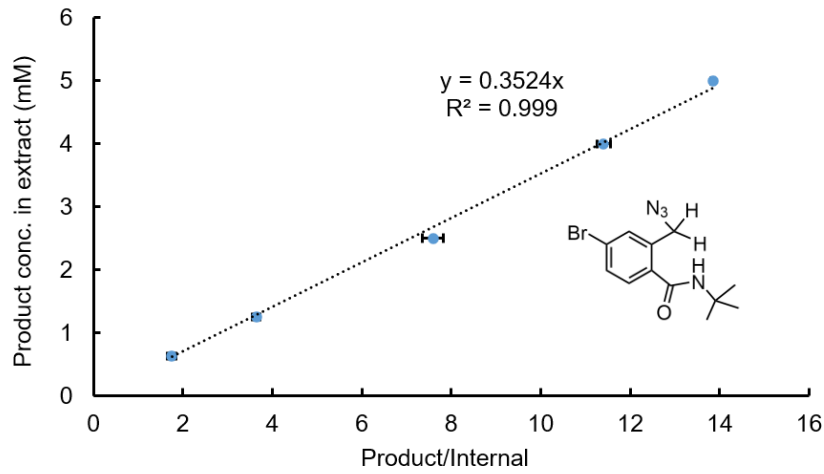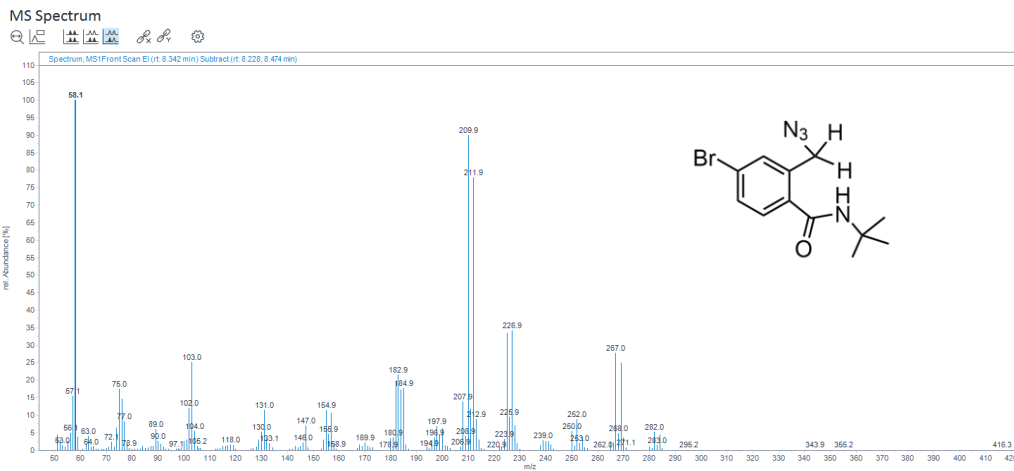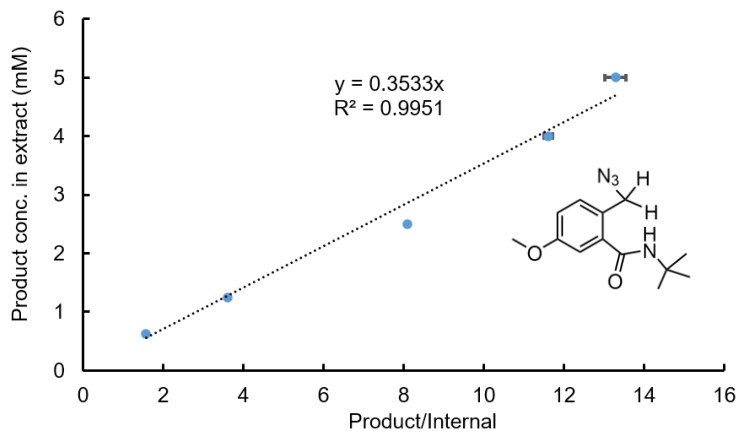

MS Spectrum

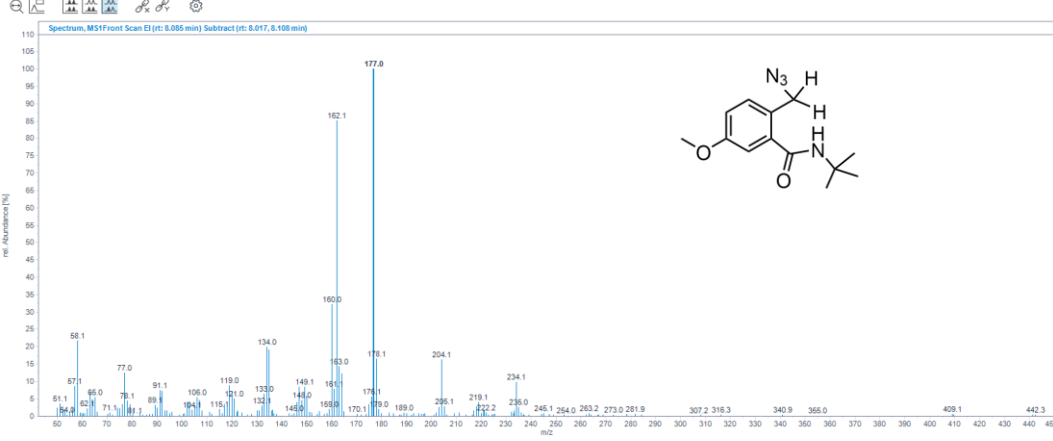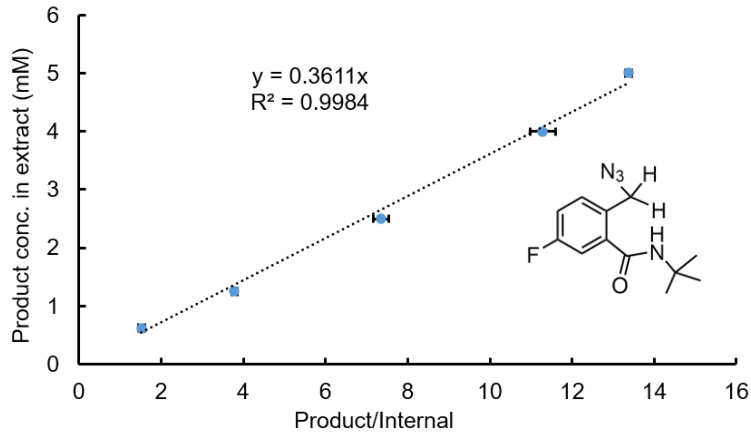

MS Spectrum

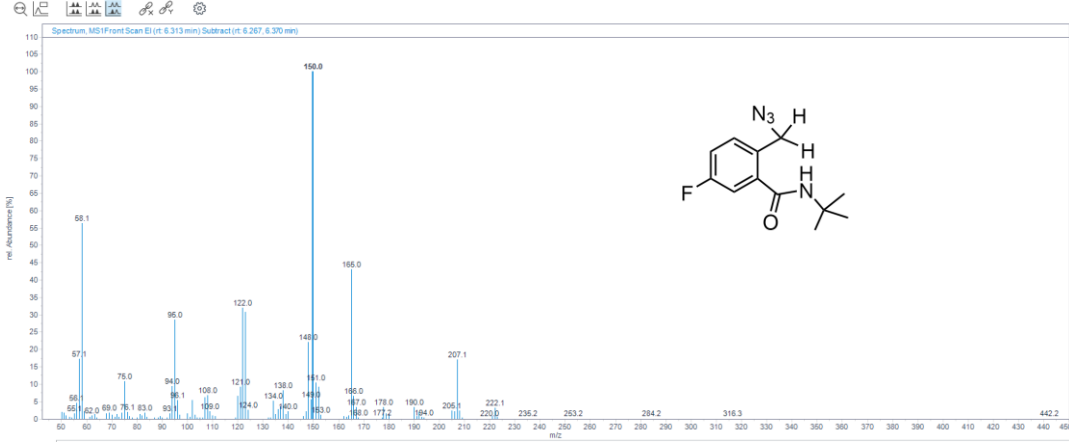

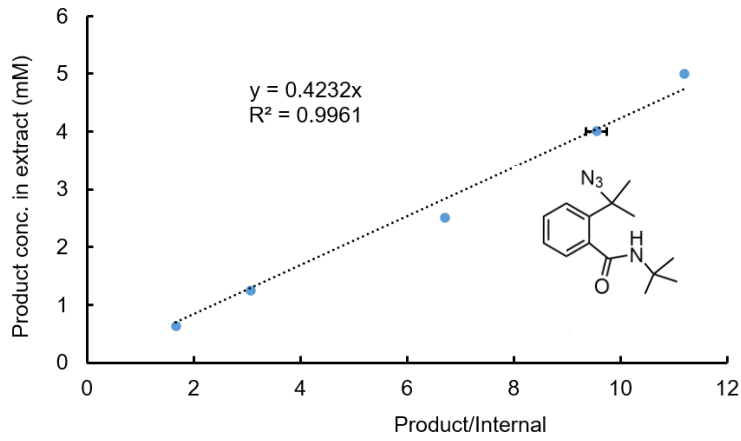

MS Spectrum

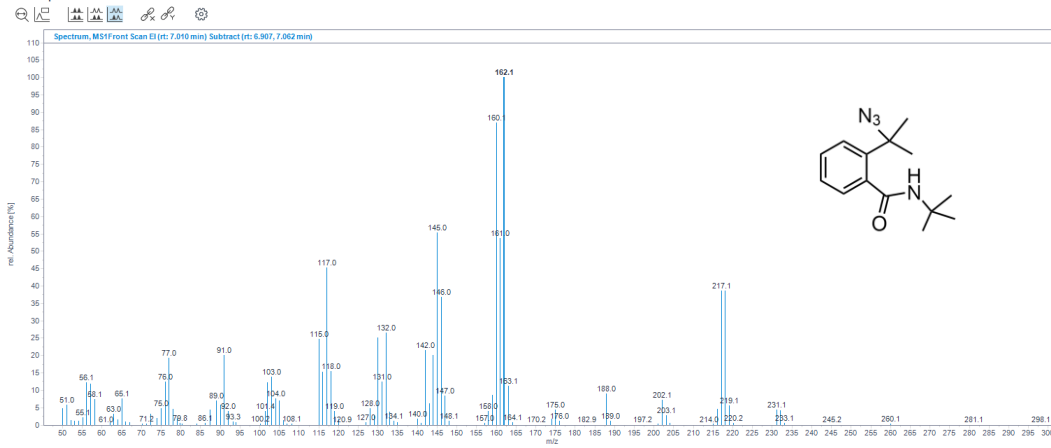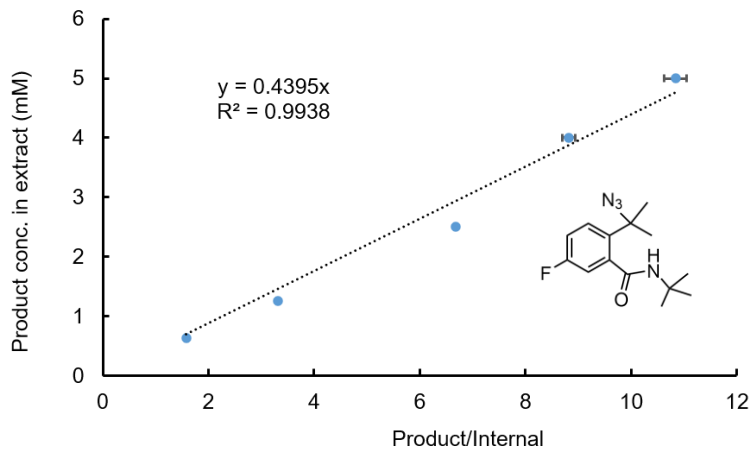

MS Spectrum

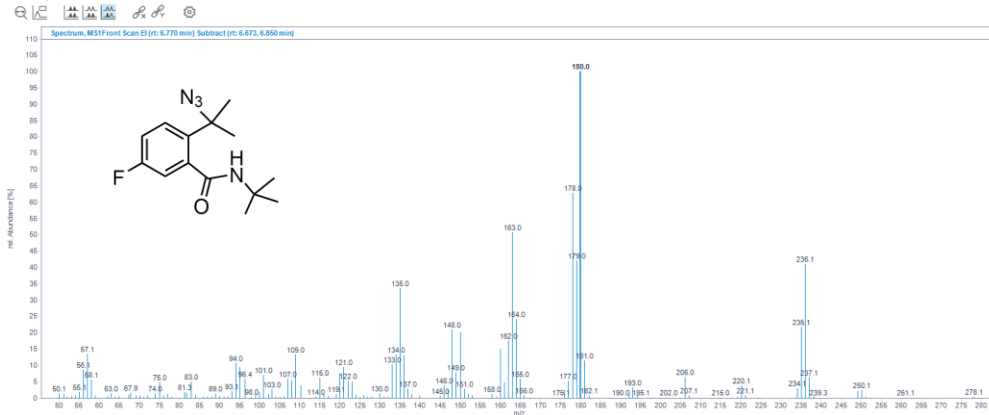



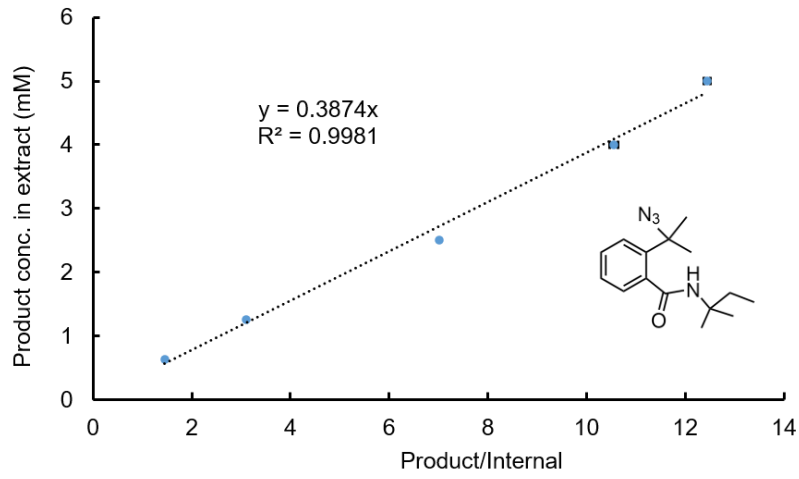

MS Spectrum

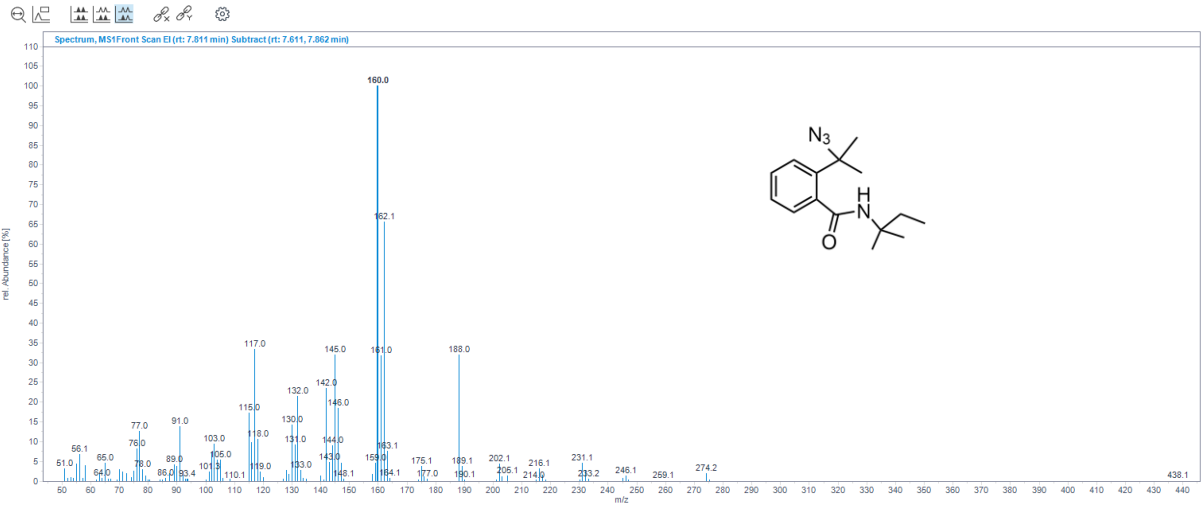

## VIII. Determination of Enantioselectivity

All e.r. values of enzymatically synthesized azidation products were determined using normal-phase chiral HPLC. The absolute configuration of enzymatically synthesized azidation product **1N** was determined to be *S* via X-ray crystallography. The absolute configurations of all other azidation products were inferred by analogy, assuming the facial selectivity of the C–N<sub>3</sub> bond forming step remains the same as that of **1N**. Each chiral determination of the enzymatic product was performed along with the chiral HPLC analysis of the corresponding racemic standard to confirm the retention time of both enantiomers.

Conditions: CHIRALPAK® IC (4.6 × 250 mm, 5 mic), 1% *i*PrOH/hexanes, 0.5 mL/min.

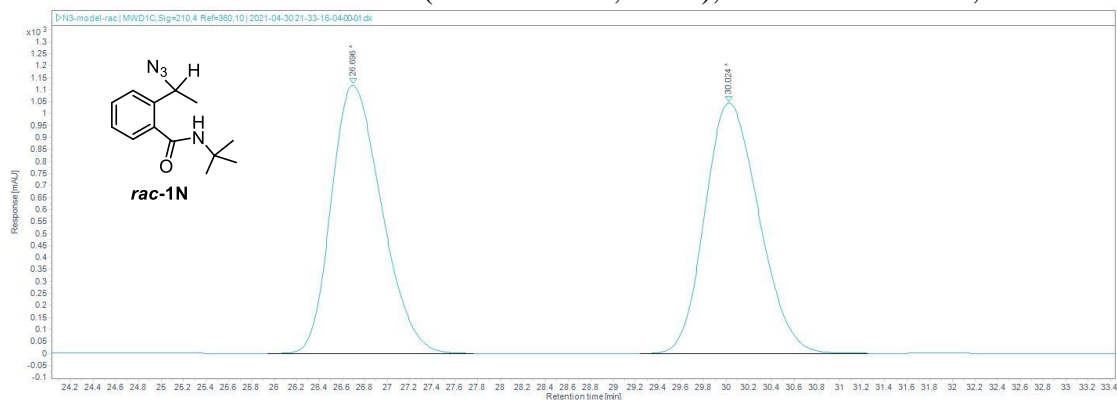

Injection Results

| Peaks | Summary |                            |          |           |        |          |         |        |               |                  |                |
|-------|---------|----------------------------|----------|-----------|--------|----------|---------|--------|---------------|------------------|----------------|
| #     | Name    | Signal description         | RT (min) | Area      | Area%  | Height   | Height% | Amount | Concentration | Start time (min) | End time (min) |
| 2     |         | MWD1C,Sig=210.4 Ref=360,10 | 30.024   | 34727.424 | 50.128 | 1044.637 | 48.31   |        |               | 29.235           | 31.256         |
| 1     |         | MWD1C,Sig=210.4 Ref=360,10 | 26.696   | 34549.505 | 49.872 | 1117.608 | 51.69   |        |               | 25.941           | 27.768         |

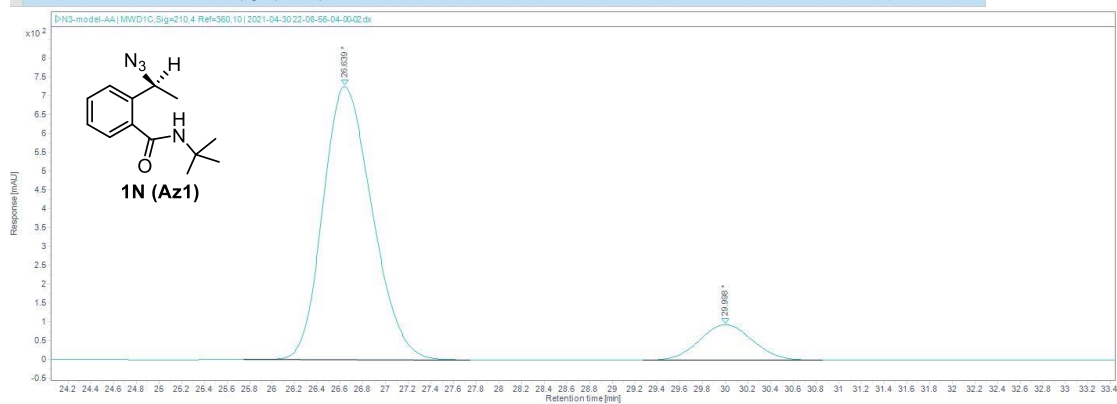

Injection Results

| Peaks | Summary |                            |          |           |        |         |         |        |               |                  |                |
|-------|---------|----------------------------|----------|-----------|--------|---------|---------|--------|---------------|------------------|----------------|
| #     | Name    | Signal description         | RT (min) | Area      | Area%  | Height  | Height% | Amount | Concentration | Start time (min) | End time (min) |
| 2     |         | MWD1C,Sig=210.4 Ref=360,10 | 29.998   | 3098.602  | 32.416 | 94.556  | 11.55   |        |               | 29.269           | 30.851         |
| 1     |         | MWD1C,Sig=210.4 Ref=360,10 | 26.639   | 21858.629 | 87.584 | 724.155 | 88.45   |        |               | 25.745           | 27.742         |

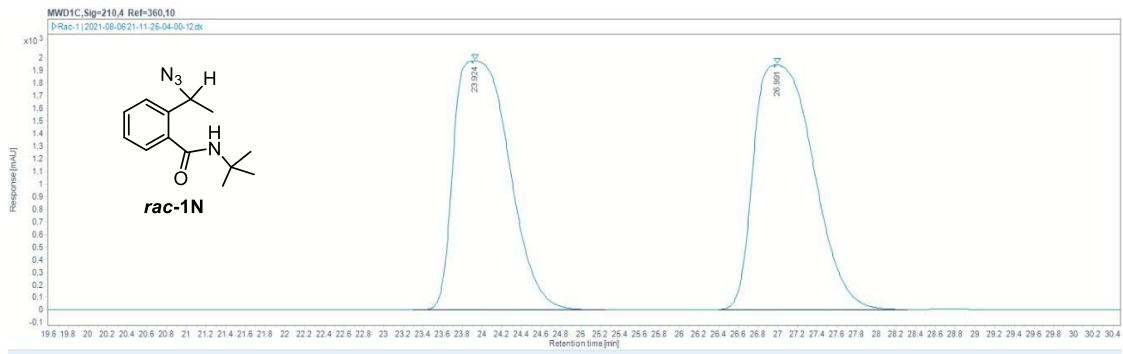

### Injection Results

| # | Name | Signal description         | RT (min) | Area      | Area%  | Height   | Height% | Amount | Concentration | Start time (min) | End time (min) |
|---|------|----------------------------|----------|-----------|--------|----------|---------|--------|---------------|------------------|----------------|
| 2 |      | MWD1C_Sig=210.4 Ref=360.10 | 26.991   | 81494.473 | 51.430 | 1940.417 | 49.54   |        |               | 26.401           | 28.313         |
| 1 |      | MWD1C_Sig=210.4 Ref=360.10 | 23.924   | 76964.092 | 48.570 | 1976.720 | 50.46   |        |               | 23.295           | 25.245         |

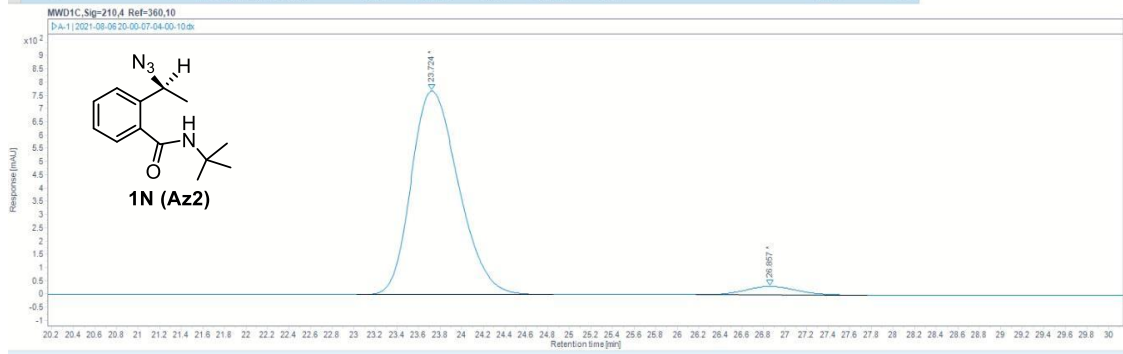

### Injection Results

| # | Name | Signal description         | RT (min) | Area      | Area%  | Height  | Height% | Amount | Concentration | Start time (min) | End time (min) |
|---|------|----------------------------|----------|-----------|--------|---------|---------|--------|---------------|------------------|----------------|
| 2 |      | MWD1C_Sig=210.4 Ref=360.10 | 26.857   | 1057.972  | 4.320  | 31.995  | 4.00    |        |               | 26.170           | 27.762         |
| 1 |      | MWD1C_Sig=210.4 Ref=360.10 | 23.724   | 23429.837 | 95.680 | 768.773 | 96.00   |        |               | 23.027           | 24.847         |

Conditions: CHIRALPAK® IC (4.6 × 250 mm, 5 mic), 1% *i*PrOH/hexanes, 0.5 mL/min.

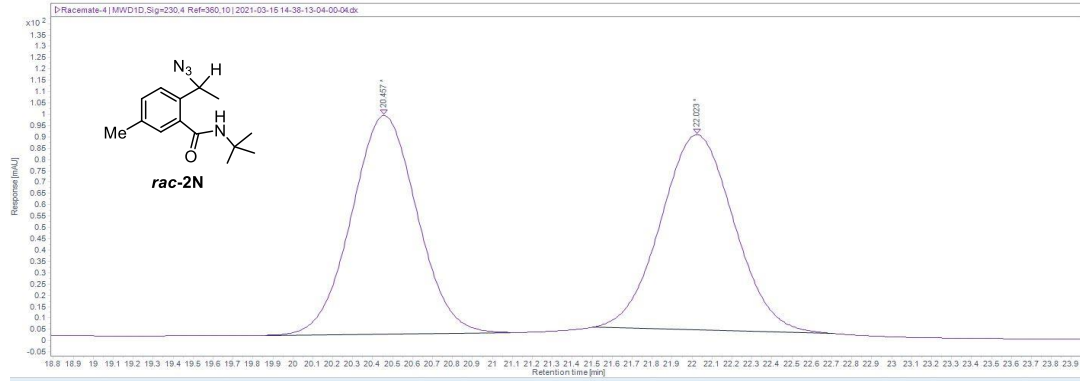

**Injection Results**

| # | Name | Signal description         | RT (min) | Area     | Area%  | Height | Height% | Amount | Concentration | Start time (min) | End time (min) |
|---|------|----------------------------|----------|----------|--------|--------|---------|--------|---------------|------------------|----------------|
| 2 |      | MWD1D.Sig=230.4 Ref=360.10 | 22.023   | 2209.769 | 50.125 | 86.244 | 47.21   |        |               | 21.502           | 22.708         |
| 1 |      | MWD1D.Sig=230.4 Ref=360.10 | 20.457   | 2198.779 | 49.875 | 96.431 | 52.79   |        |               | 19.864           | 21.088         |

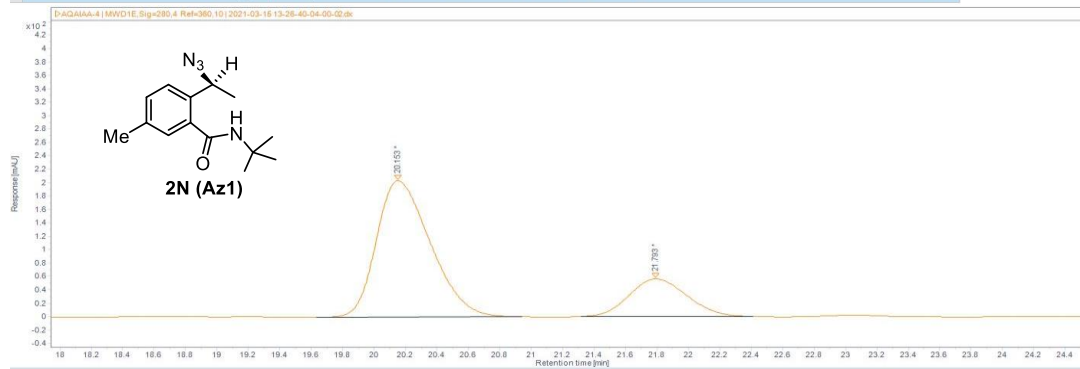

**Injection Results**

| # | Name | Signal description         | RT (min) | Area     | Area%  | Height  | Height% | Amount | Concentration | Start time (min) | End time (min) |
|---|------|----------------------------|----------|----------|--------|---------|---------|--------|---------------|------------------|----------------|
| 1 |      | MWD1E.Sig=280.4 Ref=360.10 | 20.153   | 4854.363 | 77.081 | 203.389 | 78.34   |        |               | 19.632           | 20.941         |
| 2 |      | MWD1E.Sig=280.4 Ref=360.10 | 21.793   | 1443.414 | 22.919 | 56.234  | 21.66   |        |               | 21.317           | 22.412         |

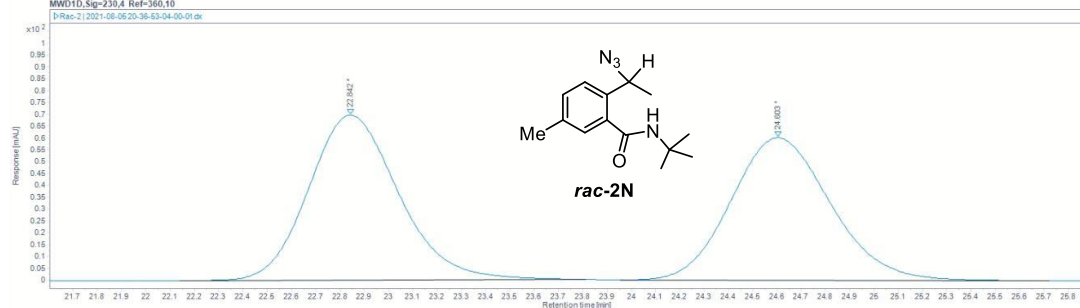

**Injection Results**

| # | Name | Signal description         | RT (min) | Area     | Area%  | Height | Height% | Amount | Concentration | Start time (min) | End time (min) |
|---|------|----------------------------|----------|----------|--------|--------|---------|--------|---------------|------------------|----------------|
| 2 |      | MWD1D.Sig=230.4 Ref=360.10 | 24.603   | 1716.320 | 48.801 | 60.105 | 46.32   |        |               | 23.953           | 25.720         |
| 1 |      | MWD1D.Sig=230.4 Ref=360.10 | 22.842   | 1800.650 | 51.199 | 69.701 | 53.68   |        |               | 22.138           | 23.812         |

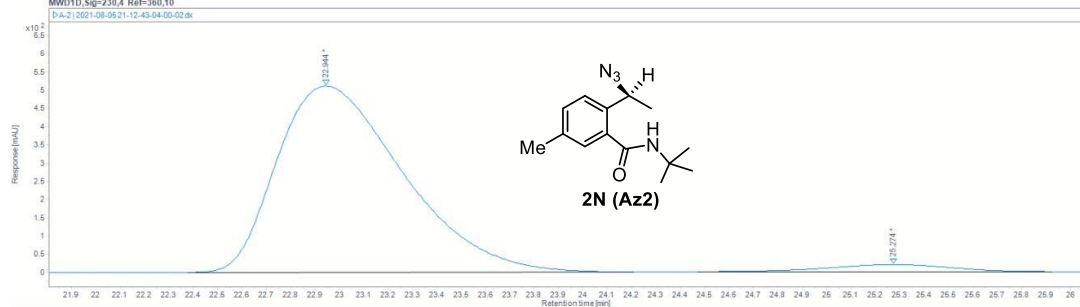

**Injection Results**

| # | Name | Signal description         | RT (min) | Area      | Area%  | Height  | Height% | Amount | Concentration | Start time (min) | End time (min) |
|---|------|----------------------------|----------|-----------|--------|---------|---------|--------|---------------|------------------|----------------|
| 2 |      | MWD1D.Sig=230.4 Ref=360.10 | 23.274   | 668.982   | 3.512  | 19.429  | 3.66    |        |               | 24.471           | 25.924         |
| 1 |      | MWD1D.Sig=230.4 Ref=360.10 | 22.944   | 18364.887 | 96.488 | 510.591 | 96.34   |        |               | 22.377           | 24.207         |

Conditions: CHIRALPAK® IC (4.6 × 250 mm, 5 mic), 1% *i*PrOH/hexanes, 0.5 mL/min.

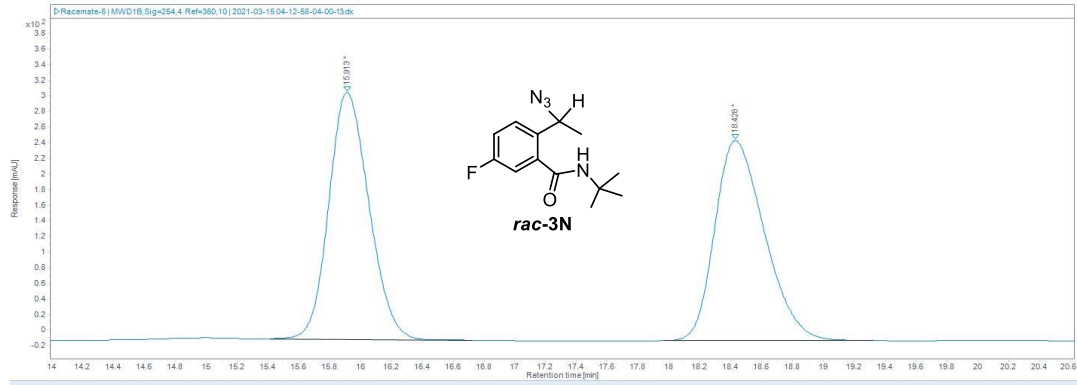

**Injection Results**

| # | Name | Signal description         | RT (min) | Area     | Area%  | Height  | Height% | Amount | Concentration | Start time (min) | End time (min) |
|---|------|----------------------------|----------|----------|--------|---------|---------|--------|---------------|------------------|----------------|
| 2 |      | MWD18.Sig=254.4 Ref=360.10 | 18.428   | 5745.806 | 50.165 | 256.186 | 44.75   |        |               | 17.966           | 19.321         |
| 1 |      | MWD18.Sig=254.4 Ref=360.10 | 15.913   | 5707.957 | 49.835 | 316.305 | 55.25   |        |               | 15.417           | 16.725         |

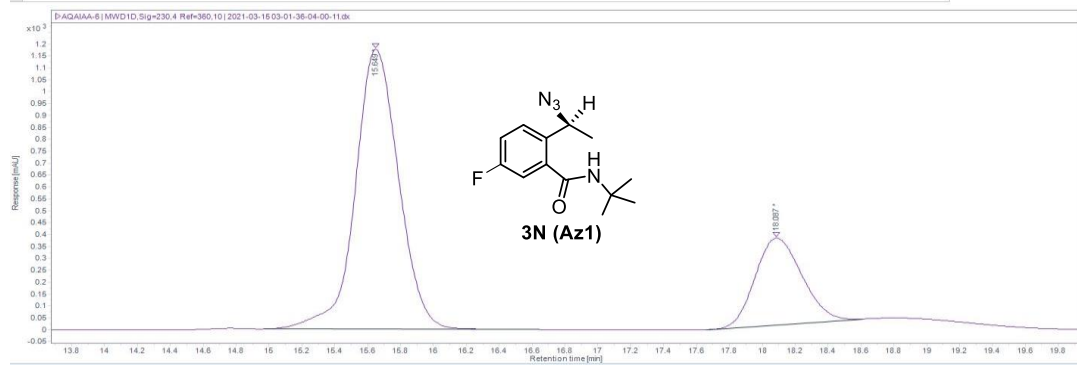

**Injection Results**

| # | Name | Signal description         | RT (min) | Area      | Area%  | Height   | Height% | Amount | Concentration | Start time (min) | End time (min) |
|---|------|----------------------------|----------|-----------|--------|----------|---------|--------|---------------|------------------|----------------|
| 2 |      | MWD10.Sig=230.4 Ref=360.10 | 18.087   | 7189.204  | 24.940 | 384.572  | 23.66   |        |               | 17.654           | 18.608         |
| 1 |      | MWD10.Sig=230.4 Ref=360.10 | 15.649   | 21636.837 | 75.060 | 1176.211 | 76.34   |        |               | 14.968           | 16.641         |

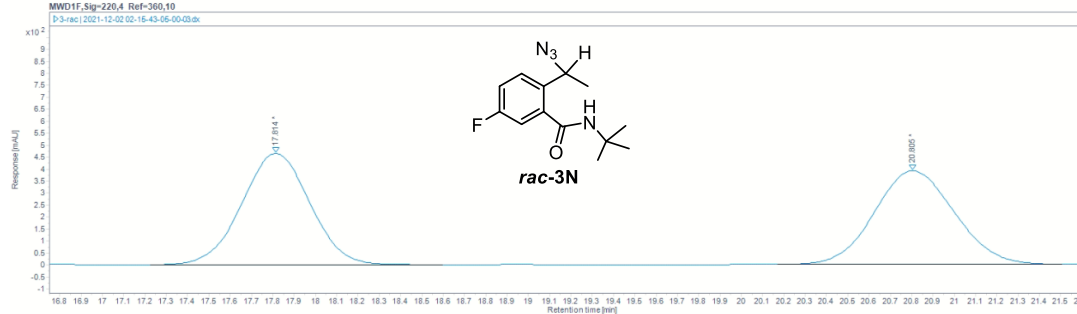

**Injection Results**

| # | Name | Signal description         | RT (min) | Area      | Area%  | Height  | Height% | Amount | Concentration | Start time (min) | End time (min) |
|---|------|----------------------------|----------|-----------|--------|---------|---------|--------|---------------|------------------|----------------|
| 2 |      | MWD1F.Sig=220.4 Ref=360.10 | 20.805   | 10205.254 | 49.617 | 390.289 | 45.64   |        |               | 20.169           | 21.503         |
| 1 |      | MWD1F.Sig=220.4 Ref=360.10 | 17.814   | 10362.815 | 50.383 | 464.764 | 54.36   |        |               | 17.223           | 18.595         |

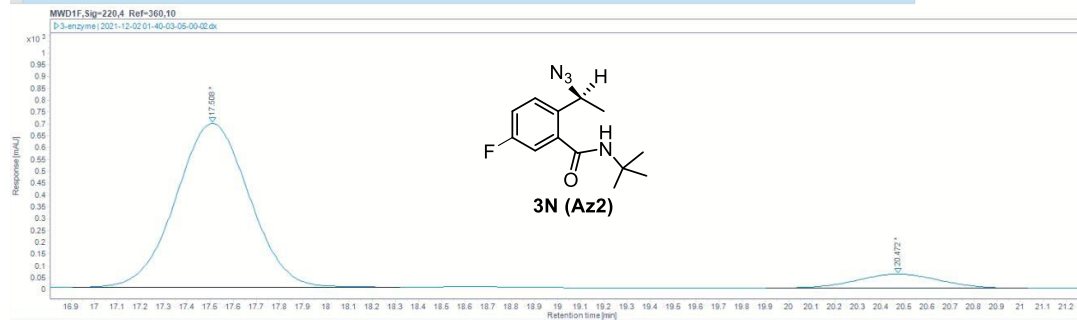

**Injection Results**

| # | Name | Signal description         | RT (min) | Area      | Area%  | Height  | Height% | Amount | Concentration | Start time (min) | End time (min) |
|---|------|----------------------------|----------|-----------|--------|---------|---------|--------|---------------|------------------|----------------|
| 2 |      | MWD1F.Sig=220.4 Ref=360.10 | 20.472   | 1480.626  | 8.839  | 59.123  | 7.87    |        |               | 19.901           | 21.032         |
| 1 |      | MWD1F.Sig=220.4 Ref=360.10 | 17.508   | 15270.095 | 91.161 | 692.185 | 92.13   |        |               | 16.907           | 18.919         |

Conditions: CHIRALPAK® IC (4.6 × 250 mm, 5 mic), 1% *i*PrOH/hexanes, 0.5 mL/min.

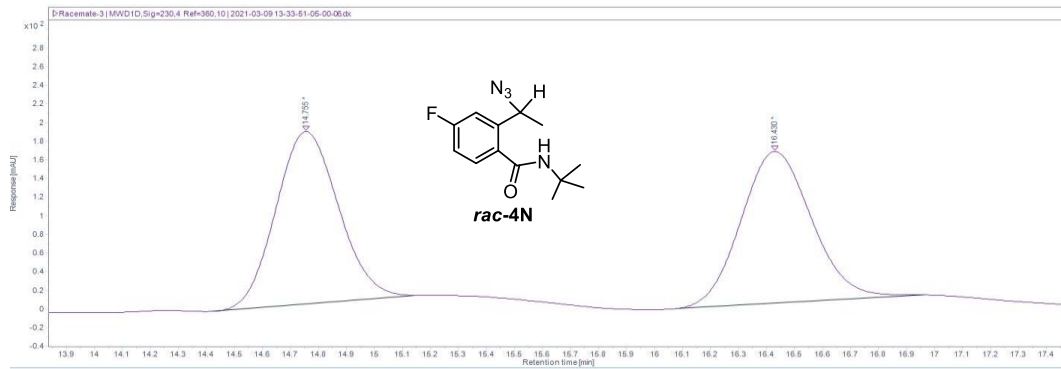

#### Injection Results

| # | Name | Signal description          | RT (min) | Area     | Area%  | Height  | Height% | Amount | Concentration | Start time (min) | End time (min) |
|---|------|-----------------------------|----------|----------|--------|---------|---------|--------|---------------|------------------|----------------|
| 2 |      | MWD1D, Sig=230,4 Ref=360,10 | 16.430   | 2854.699 | 49.865 | 162.697 | 46.82   |        |               | 16.076           | 16.962         |
| 1 |      | MWD1D, Sig=230,4 Ref=360,10 | 14.755   | 2870.124 | 50.135 | 184.820 | 53.18   |        |               | 14.421           | 15.141         |

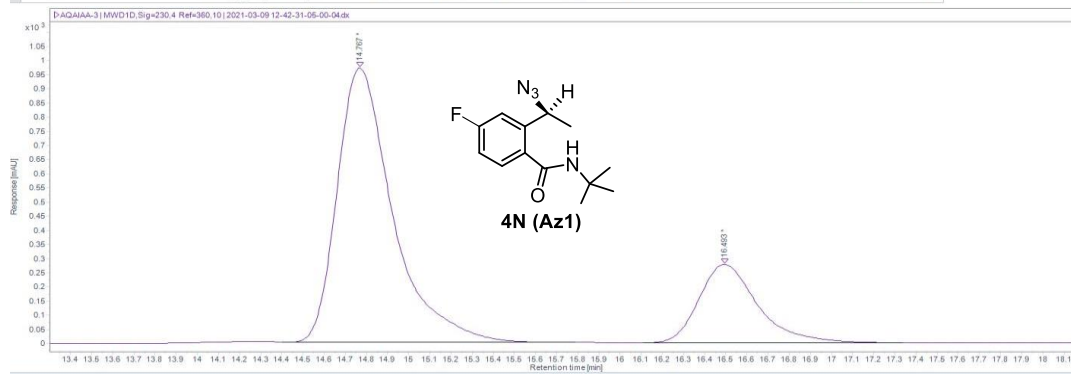

#### Injection Results

| # | Name | Signal description          | RT (min) | Area      | Area%  | Height  | Height% | Amount | Concentration | Start time (min) | End time (min) |
|---|------|-----------------------------|----------|-----------|--------|---------|---------|--------|---------------|------------------|----------------|
| 2 |      | MWD1D, Sig=230,4 Ref=360,10 | 16.493   | 5373.020  | 23.345 | 277.427 | 22.27   |        |               | 16.109           | 17.334         |
| 1 |      | MWD1D, Sig=230,4 Ref=360,10 | 14.767   | 17642.406 | 76.655 | 968.902 | 77.73   |        |               | 14.401           | 15.785         |

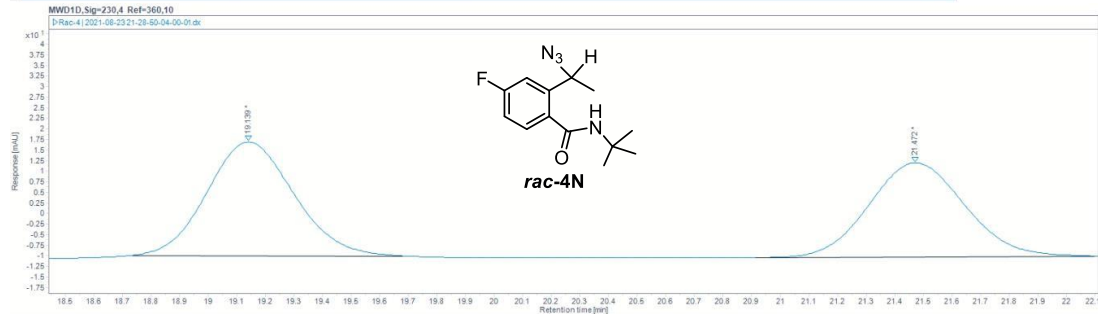

#### Injection Results

| # | Name | Signal description          | RT (min) | Area    | Area%  | Height | Height% | Amount | Concentration | Start time (min) | End time (min) |
|---|------|-----------------------------|----------|---------|--------|--------|---------|--------|---------------|------------------|----------------|
| 2 |      | MWD1D, Sig=230,4 Ref=360,10 | 21.472   | 516.787 | 47.890 | 22.223 | 45.27   |        |               | 20.913           | 22.099         |
| 1 |      | MWD1D, Sig=230,4 Ref=360,10 | 19.139   | 566.857 | 52.310 | 26.867 | 54.73   |        |               | 18.734           | 19.681         |

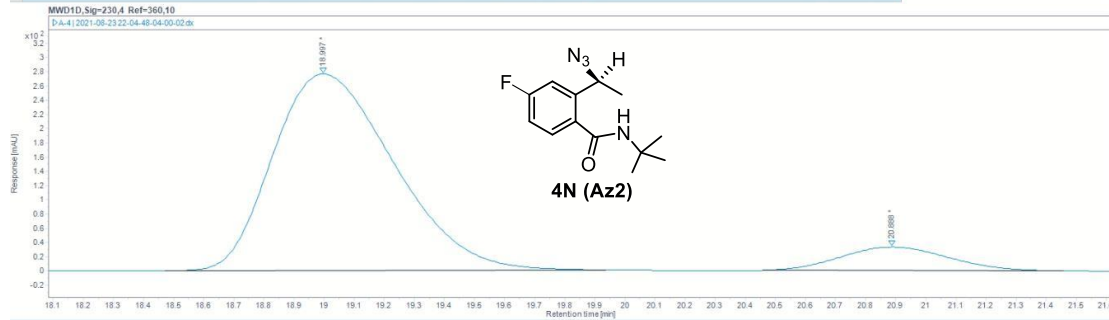

#### Injection Results

| # | Name | Signal description          | RT (min) | Area     | Area%  | Height  | Height% | Amount | Concentration | Start time (min) | End time (min) |
|---|------|-----------------------------|----------|----------|--------|---------|---------|--------|---------------|------------------|----------------|
| 2 |      | MWD1D, Sig=230,4 Ref=360,10 | 20.888   | 822.332  | 9.636  | 32.978  | 10.66   |        |               | 20.458           | 21.458         |
| 1 |      | MWD1D, Sig=230,4 Ref=360,10 | 18.997   | 7711.197 | 90.364 | 276.301 | 89.34   |        |               | 18.472           | 19.935         |

Conditions: CHIRALPAK® IC (4.6 × 250 mm, 5 mic), 2% *i*PrOH/hexanes, 0.5 mL/min.

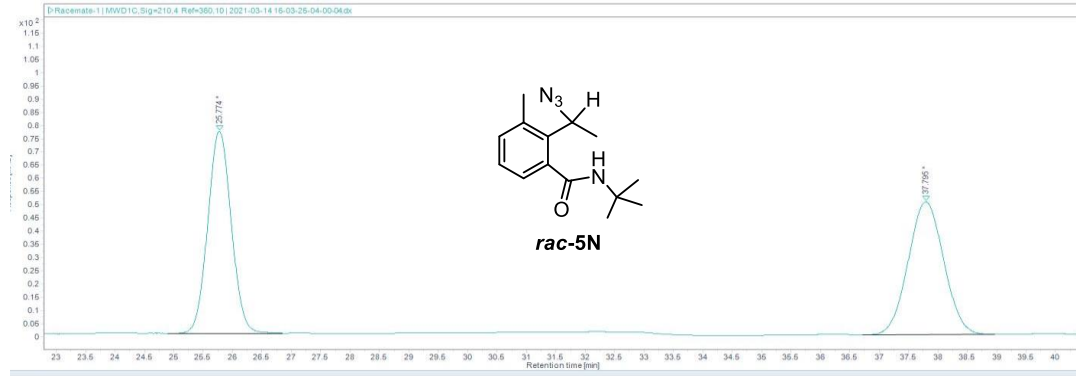

**Injection Results**

| # | Name | Signal description         | RT (min) | Area     | Area%  | Height | Height% | Amount | Concentration | Start time (min) | End time (min) |
|---|------|----------------------------|----------|----------|--------|--------|---------|--------|---------------|------------------|----------------|
| 2 |      | MWD1C,Sig=210,4 Ref=360,10 | 37.795   | 2112.633 | 49.864 | 50.232 | 39.62   |        |               | 36.721           | 38.961         |
| 1 |      | MWD1C,Sig=210,4 Ref=360,10 | 25.774   | 2124.132 | 50.136 | 76.538 | 60.38   |        |               | 24.899           | 26.850         |

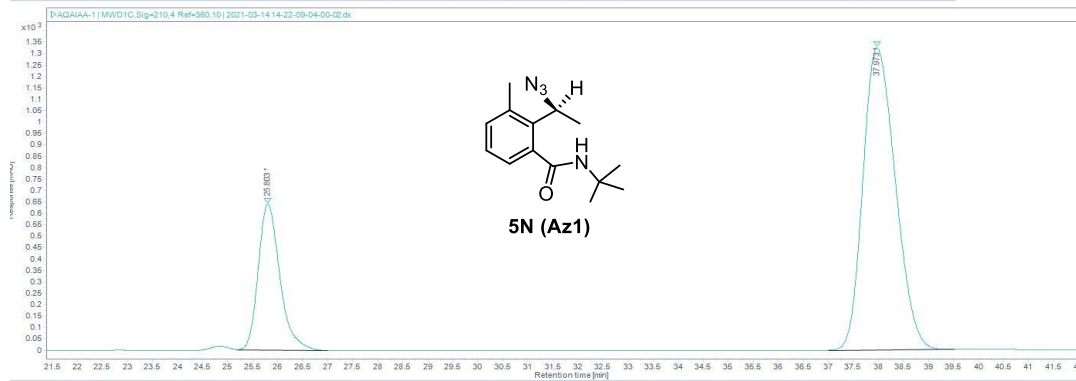

**Injection Results**

| # | Name | Signal description         | RT (min) | Area      | Area%  | Height   | Height% | Amount | Concentration | Start time (min) | End time (min) |
|---|------|----------------------------|----------|-----------|--------|----------|---------|--------|---------------|------------------|----------------|
| 2 |      | MWD1C,Sig=210,4 Ref=360,10 | 37.973   | 59638.788 | 75.735 | 1323.199 | 67.43   |        |               | 36.995           | 39.512         |
| 1 |      | MWD1C,Sig=210,4 Ref=360,10 | 25.803   | 19107.816 | 24.265 | 639.237  | 32.57   |        |               | 25.202           | 26.996         |

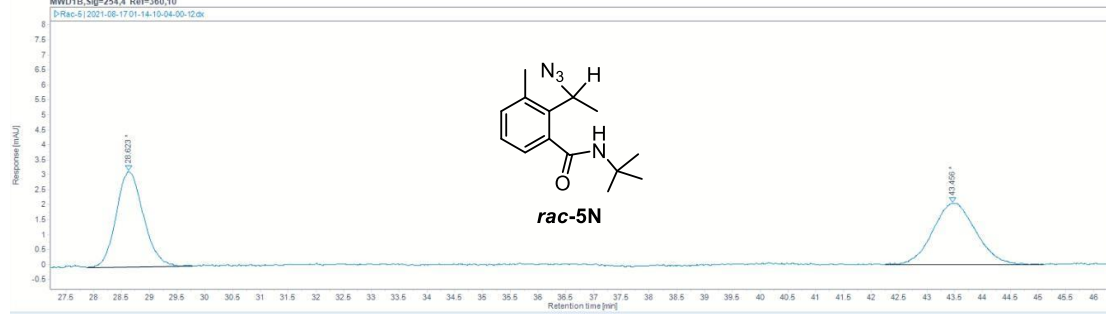

**Injection Results**

| # | Name | Signal description         | RT (min) | Area    | Area%  | Height | Height% | Amount | Concentration | Start time (min) | End time (min) |
|---|------|----------------------------|----------|---------|--------|--------|---------|--------|---------------|------------------|----------------|
| 2 |      | MWD1B,Sig=254,4 Ref=360,10 | 43.456   | 109.670 | 50.386 | 2.042  | 39.10   |        |               | 42.242           | 45.099         |
| 1 |      | MWD1B,Sig=254,4 Ref=360,10 | 28.623   | 107.992 | 49.614 | 3.181  | 60.90   |        |               | 27.877           | 29.769         |

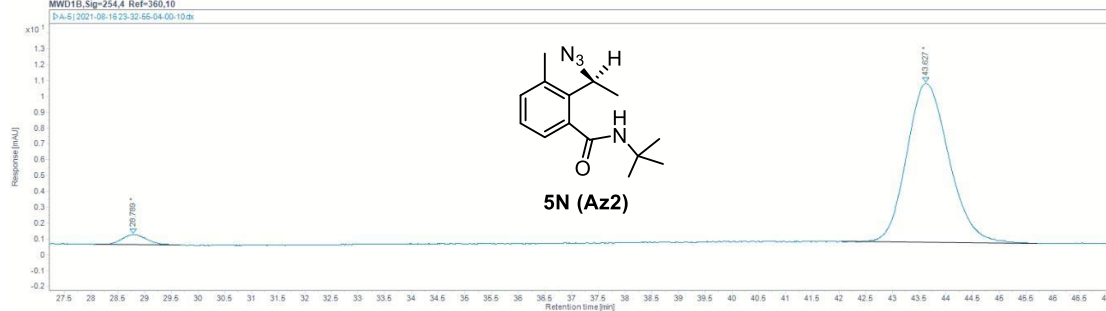

**Injection Results**

| # | Name | Signal description         | RT (min) | Area    | Area%  | Height | Height% | Amount | Concentration | Start time (min) | End time (min) |
|---|------|----------------------------|----------|---------|--------|--------|---------|--------|---------------|------------------|----------------|
| 2 |      | MWD1B,Sig=254,4 Ref=360,10 | 43.627   | 354.500 | 96.449 | 10.037 | 93.99   |        |               | 42.049           | 45.701         |
| 1 |      | MWD1B,Sig=254,4 Ref=360,10 | 28.789   | 20.418  | 3.551  | 0.642  | 6.01    |        |               | 28.077           | 29.660         |

Conditions: CHIRALPAK® IC (4.6 × 250 mm, 5 mic), 1% *i*PrOH/hexanes, 0.5 mL/min.

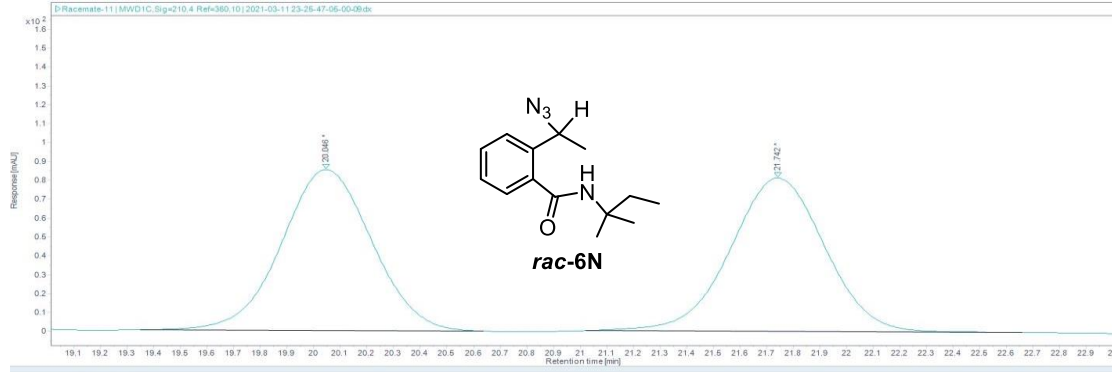

**Injection Results**

| # | Name | Signal description         | RT (min) | Area     | Area%  | Height | Height% | Amount | Concentration | Start time (min) | End time (min) |
|---|------|----------------------------|----------|----------|--------|--------|---------|--------|---------------|------------------|----------------|
| 2 |      | MWD1C,Sig=210.4 Ref=360,10 | 21.742   | 2005.207 | 49.831 | 81.255 | 48.81   |        |               | 21.023           | 22.659         |
| 1 |      | MWD1C,Sig=210.4 Ref=360,10 | 20.046   | 2018.846 | 50.169 | 85.226 | 51.19   |        |               | 19.350           | 20.656         |

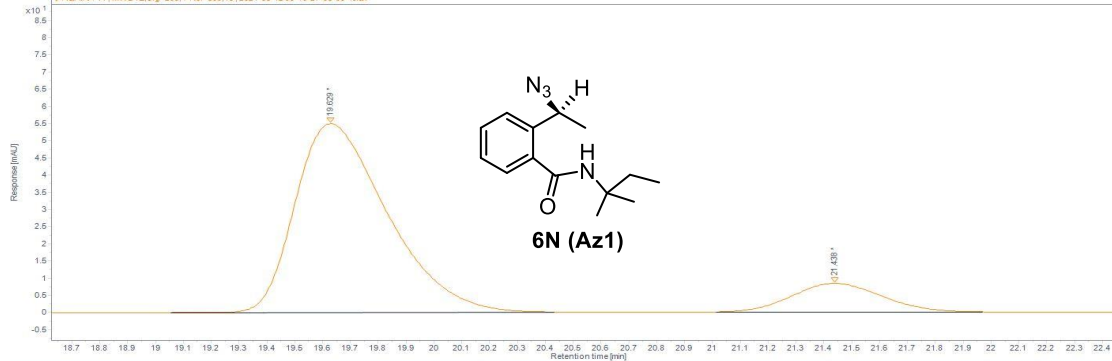

**Injection Results**

| # | Name | Signal description         | RT (min) | Area     | Area%  | Height | Height% | Amount | Concentration | Start time (min) | End time (min) |
|---|------|----------------------------|----------|----------|--------|--------|---------|--------|---------------|------------------|----------------|
| 1 |      | MWD1E,Sig=280.4 Ref=360,10 | 19.629   | 1259.565 | 87.187 | 54.902 | 86.90   |        |               | 19.054           | 20.432         |
| 2 |      | MWD1E,Sig=280.4 Ref=360,10 | 21.438   | 185.099  | 12.813 | 8.278  | 13.10   |        |               | 21.011           | 21.970         |

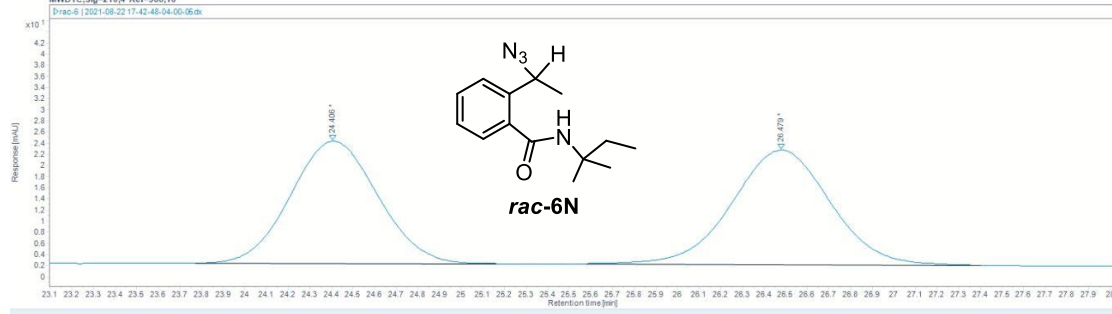

**Injection Results**

| # | Name | Signal description         | RT (min) | Area    | Area%  | Height | Height% | Amount | Concentration | Start time (min) | End time (min) |
|---|------|----------------------------|----------|---------|--------|--------|---------|--------|---------------|------------------|----------------|
| 2 |      | MWD1C,Sig=210.4 Ref=360,10 | 26.479   | 648.961 | 51.315 | 20.537 | 48.36   |        |               | 25.577           | 27.403         |
| 1 |      | MWD1C,Sig=210.4 Ref=360,10 | 24.406   | 615.701 | 48.685 | 21.928 | 51.64   |        |               | 23.769           | 25.161         |

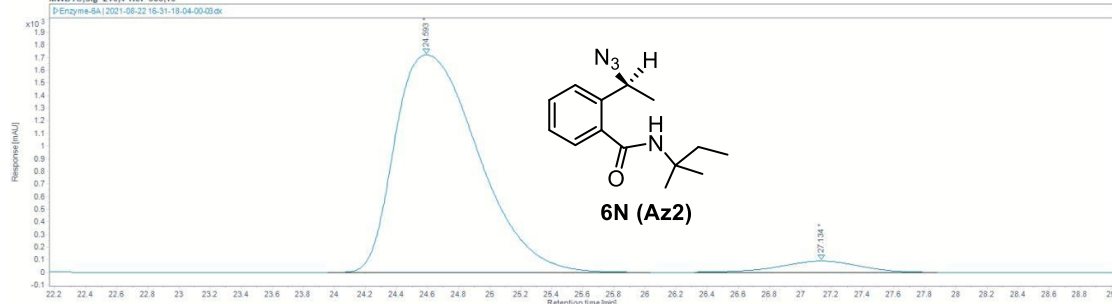

**Injection Results**

| # | Name | Signal description         | RT (min) | Area      | Area%  | Height   | Height% | Amount | Concentration | Start time (min) | End time (min) |
|---|------|----------------------------|----------|-----------|--------|----------|---------|--------|---------------|------------------|----------------|
| 2 |      | MWD1C,Sig=210.4 Ref=360,10 | 27.134   | 3132.631  | 4.644  | 88.522   | 4.88    |        |               | 26.314           | 27.877         |
| 1 |      | MWD1C,Sig=210.4 Ref=360,10 | 24.593   | 64317.220 | 95.356 | 1723.939 | 95.12   |        |               | 23.954           | 26.034         |



Conditions: CHIRALPAK® IC (4.6 × 250 mm, 5 mic), 2% *i*PrOH/hexanes, 0.5 mL/min.

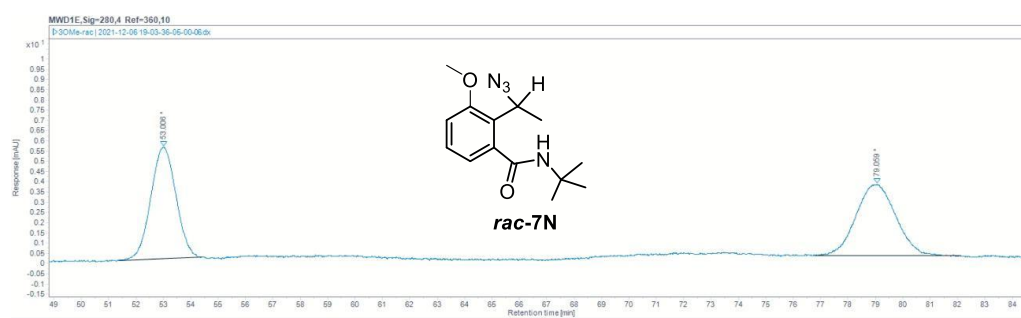

**Injection Results**

| # | Name | Signal description         | RT (min) | Area    | Area%  | Height | Height% | Amount | Concentration | Start time (min) | End time (min) |
|---|------|----------------------------|----------|---------|--------|--------|---------|--------|---------------|------------------|----------------|
| 2 |      | MWD1E.Sig=280.4 Ref=360.10 | 79.059   | 349.770 | 50.211 | 3.469  | 88.89   |        |               | 76.777           | 82.110         |
| 1 |      | MWD1E.Sig=280.4 Ref=360.10 | 53.006   | 346.836 | 49.789 | 5.451  | 61.11   |        |               | 51.361           | 54.398         |

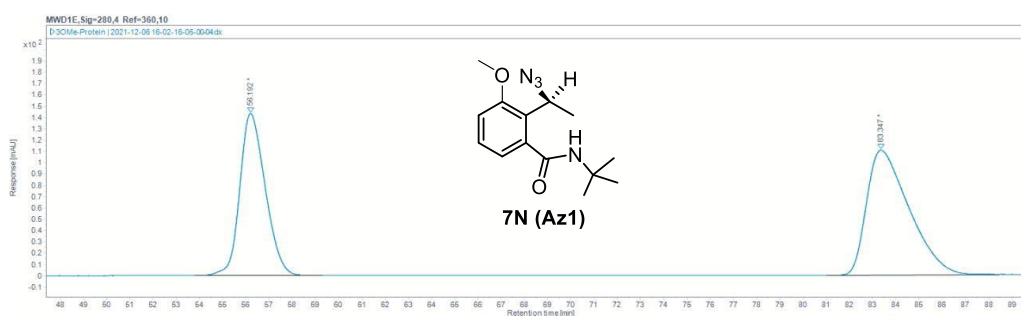

**Injection Results**

| # | Name | Signal description         | RT (min) | Area      | Area%  | Height  | Height% | Amount | Concentration | Start time (min) | End time (min) |
|---|------|----------------------------|----------|-----------|--------|---------|---------|--------|---------------|------------------|----------------|
| 2 |      | MWD1E.Sig=280.4 Ref=360.10 | 83.347   | 13981.586 | 56.119 | 110.466 | 43.54   |        |               | 81.015           | 88.453         |
| 1 |      | MWD1E.Sig=280.4 Ref=360.10 | 56.192   | 10932.538 | 43.881 | 143.256 | 56.46   |        |               | 53.773           | 59.276         |

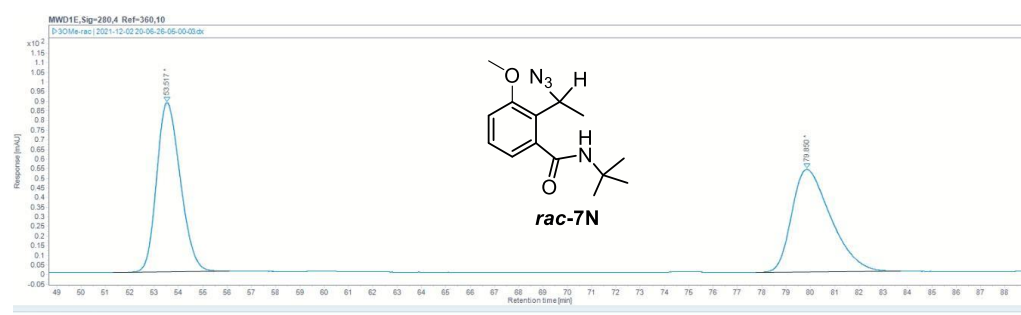

**Injection Results**

| # | Name | Signal description         | RT (min) | Area     | Area%  | Height | Height% | Amount | Concentration | Start time (min) | End time (min) |
|---|------|----------------------------|----------|----------|--------|--------|---------|--------|---------------|------------------|----------------|
| 2 |      | MWD1E.Sig=280.4 Ref=360.10 | 79.850   | 5947.915 | 50.933 | 53.284 | 37.73   |        |               | 77.766           | 83.717         |
| 1 |      | MWD1E.Sig=280.4 Ref=360.10 | 53.517   | 5940.042 | 49.967 | 87.929 | 62.27   |        |               | 51.317           | 56.083         |

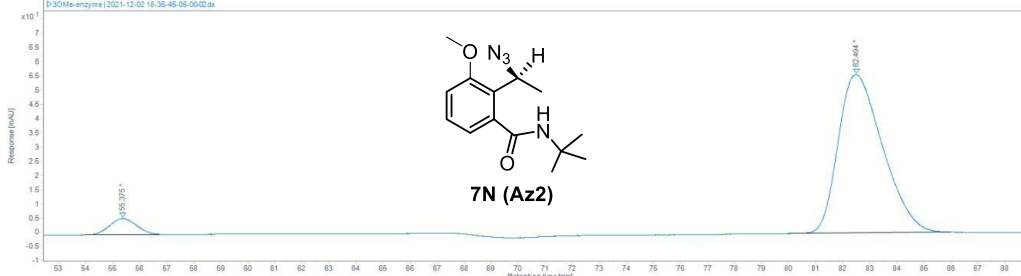

**Injection Results**

| # | Name | Signal description         | RT (min) | Area     | Area%  | Height | Height% | Amount | Concentration | Start time (min) | End time (min) |
|---|------|----------------------------|----------|----------|--------|--------|---------|--------|---------------|------------------|----------------|
| 2 |      | MWD1E.Sig=280.4 Ref=360.10 | 82.494   | 6364.623 | 94.244 | 55.772 | 90.82   |        |               | 80.076           | 85.980         |
| 1 |      | MWD1E.Sig=280.4 Ref=360.10 | 55.375   | 388.719  | 5.756  | 5.635  | 9.18    |        |               | 54.003           | 56.755         |

Conditions: CHIRALPAK® IC (4.6 × 250 mm, 5 mic), 1% *i*PrOH/hexanes, 0.5 mL/min.

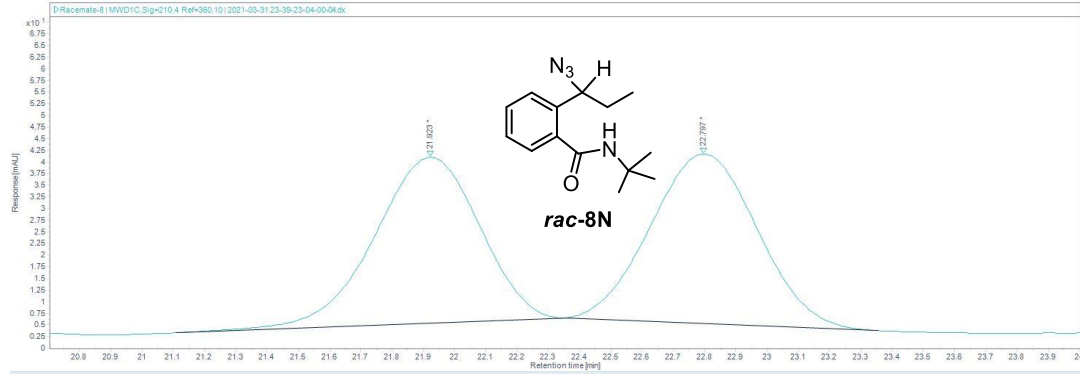

**Injection Results**

| # | Name | Signal description         | RT (min) | Area    | Area%  | Height | Height% | Amount | Concentration | Start time (min) | End time (min) |
|---|------|----------------------------|----------|---------|--------|--------|---------|--------|---------------|------------------|----------------|
| 2 |      | MWD1C,Sig=210.4 Ref=360,10 | 22.797   | 861.492 | 50.960 | 36.397 | 50.56   |        |               | 22.360           | 23.357         |
| 1 |      | MWD1C,Sig=210.4 Ref=360,10 | 21.923   | 830.955 | 49.040 | 35.584 | 49.44   |        |               | 21.108           | 22.360         |

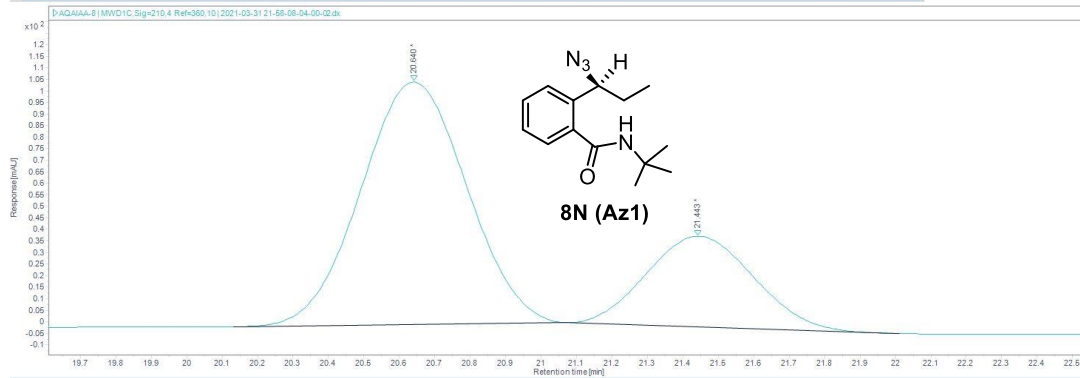

**Injection Results**

| # | Name | Signal description         | RT (min) | Area     | Area%  | Height  | Height% | Amount | Concentration | Start time (min) | End time (min) |
|---|------|----------------------------|----------|----------|--------|---------|---------|--------|---------------|------------------|----------------|
| 2 |      | MWD1C,Sig=210.4 Ref=360,10 | 21.443   | 827.000  | 27.501 | 39.984  | 27.26   |        |               | 21.066           | 22.011         |
| 1 |      | MWD1C,Sig=210.4 Ref=360,10 | 20.640   | 2180.206 | 72.499 | 105.112 | 72.74   |        |               | 20.133           | 21.066         |

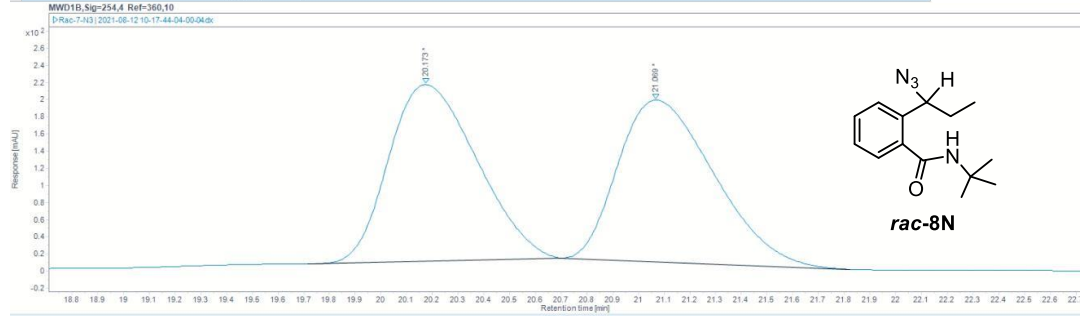

**Injection Results**

| # | Name | Signal description         | RT (min) | Area     | Area%  | Height  | Height% | Amount | Concentration | Start time (min) | End time (min) |
|---|------|----------------------------|----------|----------|--------|---------|---------|--------|---------------|------------------|----------------|
| 2 |      | MWD1B,Sig=254.4 Ref=360,10 | 21.069   | 4885.870 | 49.924 | 188.355 | 47.78   |        |               | 20.693           | 21.823         |
| 1 |      | MWD1B,Sig=254.4 Ref=360,10 | 20.173   | 4900.705 | 50.076 | 205.880 | 52.22   |        |               | 19.717           | 20.693         |

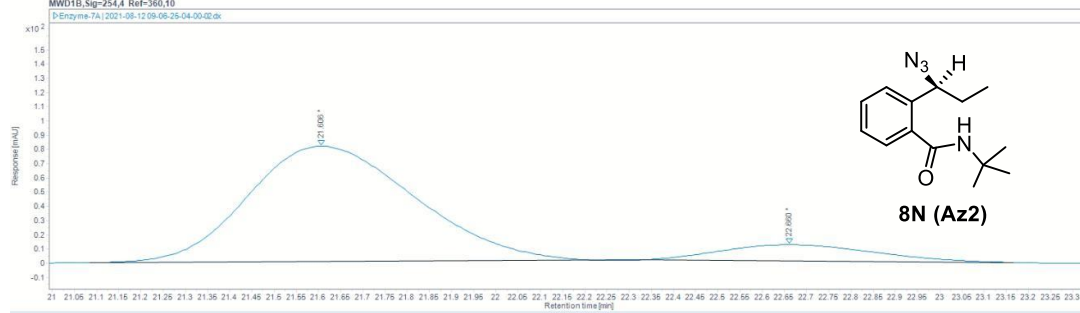

**Injection Results**

| # | Name | Signal description         | RT (min) | Area     | Area%  | Height | Height% | Amount | Concentration | Start time (min) | End time (min) |
|---|------|----------------------------|----------|----------|--------|--------|---------|--------|---------------|------------------|----------------|
| 2 |      | MWD1B,Sig=254.4 Ref=360,10 | 22.690   | 276.541  | 11.517 | 11.482 | 32.39   |        |               | 22.324           | 23.166         |
| 1 |      | MWD1B,Sig=254.4 Ref=360,10 | 21.084   | 2124.888 | 88.483 | 81.199 | 87.61   |        |               | 21.084           | 22.324         |

Conditions: CHIRALPAK® IC (4.6 × 250 mm, 5 mic), 1% *i*PrOH/hexanes, 0.10 mL/min.

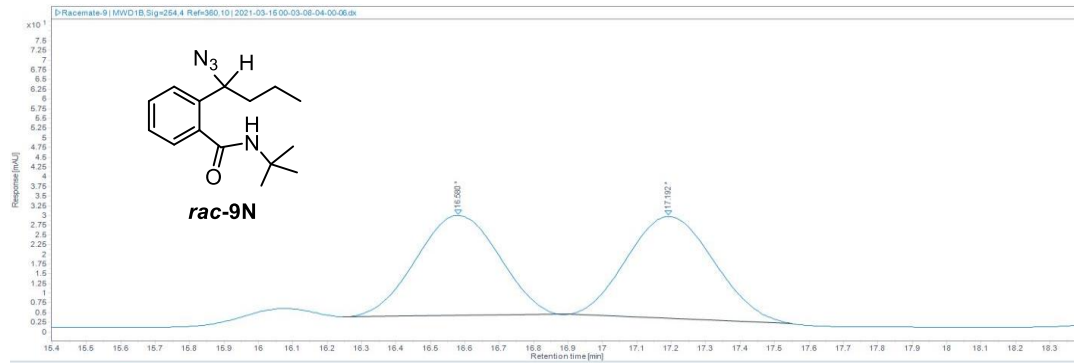

**Injection Results**

| # | Name | Signal description         | RT (min) | Area    | Area%  | Height | Height% | Amount | Concentration | Start time (min) | End time (min) |
|---|------|----------------------------|----------|---------|--------|--------|---------|--------|---------------|------------------|----------------|
| 1 |      | MWD1B,Sig=254,4 Ref=360,10 | 16.580   | 433.020 | 48.309 | 25.816 | 49.57   |        |               | 16.244           | 16.897         |
| 2 |      | MWD1B,Sig=254,4 Ref=360,10 | 17.192   | 463.332 | 51.691 | 26.263 | 50.43   |        |               | 16.897           | 17.551         |

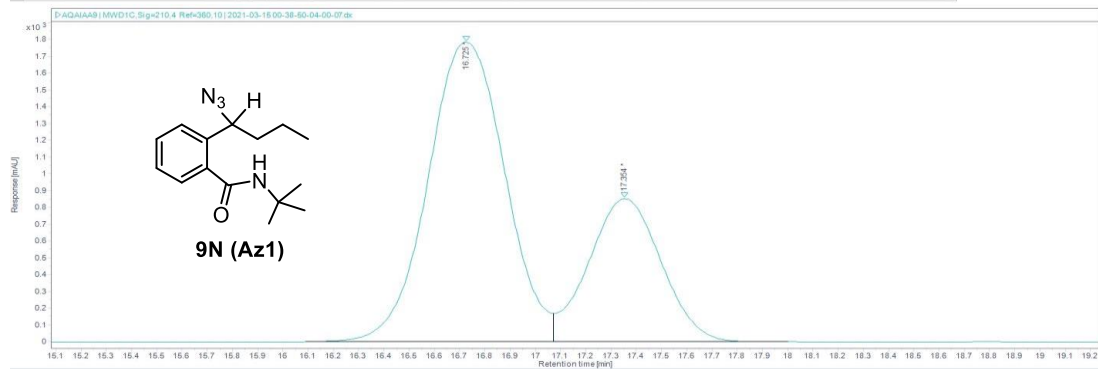

**Injection Results**

| # | Name | Signal description         | RT (min) | Area      | Area%  | Height   | Height% | Amount | Concentration | Start time (min) | End time (min) |
|---|------|----------------------------|----------|-----------|--------|----------|---------|--------|---------------|------------------|----------------|
| 2 |      | MWD1C,Sig=210,4 Ref=360,10 | 17.354   | 16959.275 | 31.088 | 851.007  | 32.32   |        |               | 17.071           | 18.002         |
| 1 |      | MWD1C,Sig=210,4 Ref=360,10 | 17.735   | 37592.489 | 68.912 | 1782.428 | 67.68   |        |               | 16.091           | 17.071         |

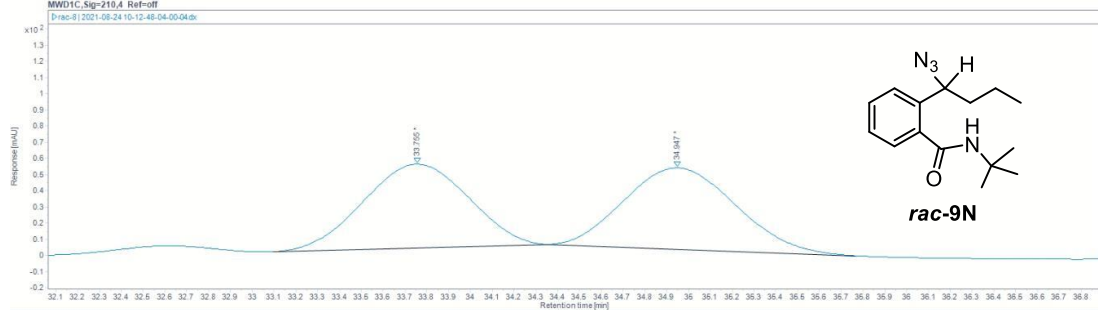

**Injection Results**

| # | Name | Signal description      | RT (min) | Area     | Area%  | Height | Height% | Amount | Concentration | Start time (min) | End time (min) |
|---|------|-------------------------|----------|----------|--------|--------|---------|--------|---------------|------------------|----------------|
| 2 |      | MWD1C,Sig=210,4 Ref=off | 34.947   | 1787.079 | 50.738 | 50.268 | 49.29   |        |               | 34.356           | 35.766         |
| 1 |      | MWD1C,Sig=210,4 Ref=off | 33.755   | 1735.086 | 49.262 | 51.722 | 50.71   |        |               | 33.098           | 34.356         |

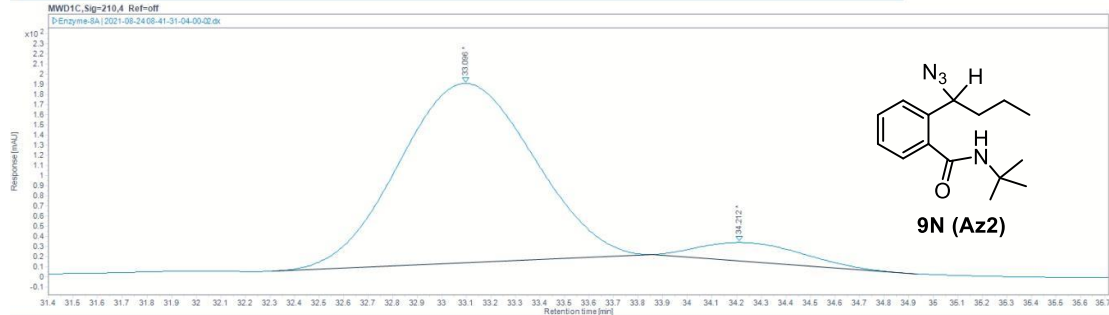

**Injection Results**

| # | Name | Signal description      | RT (min) | Area     | Area%  | Height  | Height% | Amount | Concentration | Start time (min) | End time (min) |
|---|------|-------------------------|----------|----------|--------|---------|---------|--------|---------------|------------------|----------------|
| 2 |      | MWD1C,Sig=210,4 Ref=off | 34.212   | 543.528  | 7.465  | 18.164  | 9.31    |        |               | 33.858           | 34.936         |
| 1 |      | MWD1C,Sig=210,4 Ref=off | 33.096   | 6797.461 | 92.535 | 177.044 | 90.69   |        |               | 32.911           | 33.858         |

Conditions: CHIRALPAK® IC (4.6 × 250 mm, 5 mic), 1% *i*PrOH/hexanes, 0.25 mL/min.

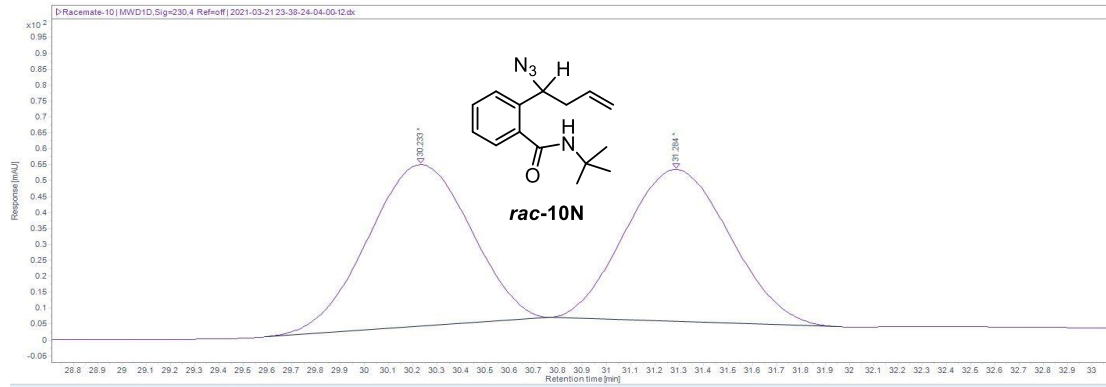

**Injection Results**

| # | Name | Signal description      | RT (min) | Area     | Area%  | Height | Height% | Amount | Concentration | Start time (min) | End time (min) |
|---|------|-------------------------|----------|----------|--------|--------|---------|--------|---------------|------------------|----------------|
| 2 |      | MWD1D,Sig+230,4 Ref=off | 31.284   | 1439.617 | 49.032 | 47.657 | 48.46   |        |               | 30.764           | 31.968         |
| 1 |      | MWD1D,Sig+230,4 Ref=off | 30.233   | 1496.484 | 50.968 | 50.687 | 51.54   |        |               | 29.591           | 30.764         |

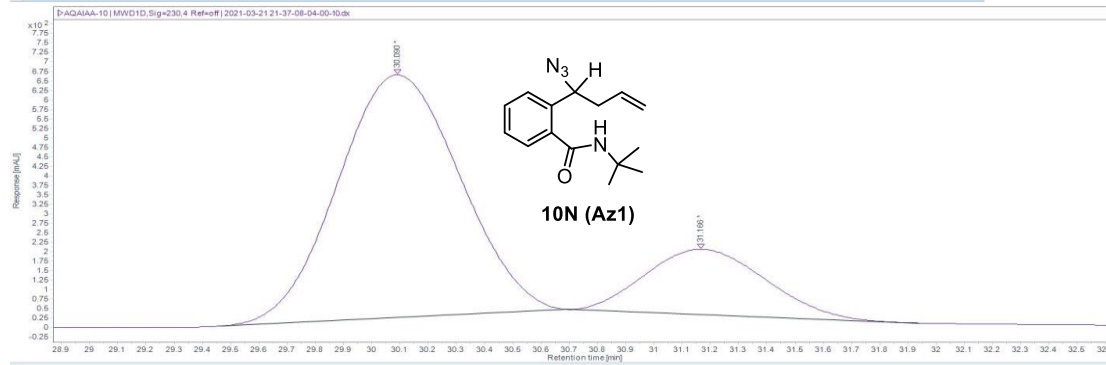

**Injection Results**

| # | Name | Signal description      | RT (min) | Area      | Area%  | Height  | Height% | Amount | Concentration | Start time (min) | End time (min) |
|---|------|-------------------------|----------|-----------|--------|---------|---------|--------|---------------|------------------|----------------|
| 2 |      | MWD1D,Sig+230,4 Ref=off | 31.166   | 5098.783  | 20.955 | 171.801 | 21.18   |        |               | 30.691           | 31.942         |
| 1 |      | MWD1D,Sig+230,4 Ref=off | 30.090   | 19233.583 | 79.045 | 639.413 | 78.82   |        |               | 29.457           | 30.691         |

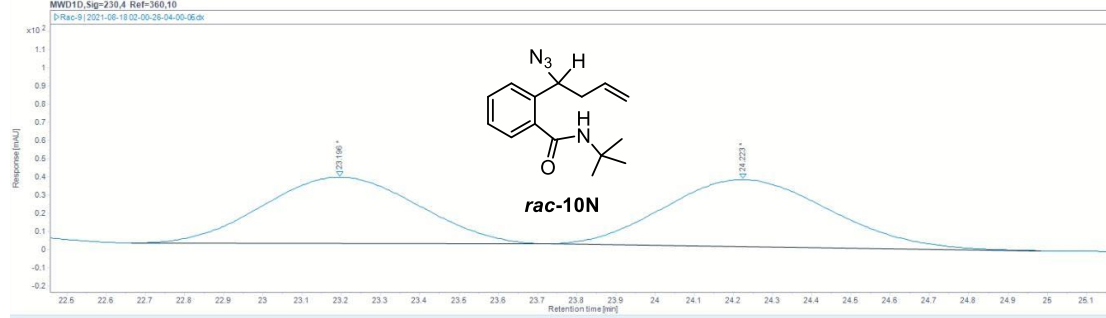

**Injection Results**

| # | Name | Signal description         | RT (min) | Area     | Area%  | Height | Height% | Amount | Concentration | Start time (min) | End time (min) |
|---|------|----------------------------|----------|----------|--------|--------|---------|--------|---------------|------------------|----------------|
| 2 |      | MWD1D,Sig+230,4 Ref=360,10 | 24.223   | 1078.182 | 51.996 | 36.803 | 50.30   |        |               | 23.735           | 24.985         |
| 1 |      | MWD1D,Sig+230,4 Ref=360,10 | 23.196   | 995.392  | 48.004 | 36.366 | 49.70   |        |               | 22.664           | 23.735         |

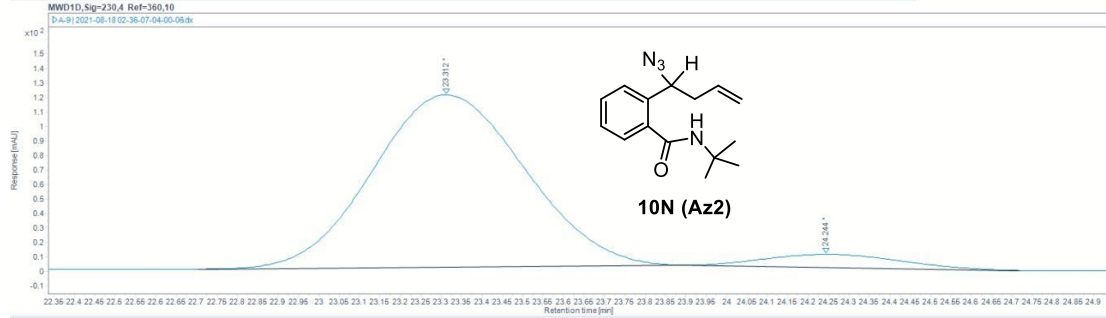

**Injection Results**

| # | Name | Signal description         | RT (min) | Area     | Area%  | Height  | Height% | Amount | Concentration | Start time (min) | End time (min) |
|---|------|----------------------------|----------|----------|--------|---------|---------|--------|---------------|------------------|----------------|
| 2 |      | MWD1D,Sig+230,4 Ref=360,10 | 24.244   | 209.408  | 6.354  | 9.074   | 7.10    |        |               | 23.890           | 24.717         |
| 1 |      | MWD1D,Sig+230,4 Ref=360,10 | 23.312   | 3086.081 | 93.646 | 118.705 | 92.90   |        |               | 22.702           | 23.890         |

## IX. Preparative Scale Enzymatic Reactions

**Preparation of whole-cell suspensions for azidation reactions:** Two hundred milliliter TB<sub>amp</sub> in a one-liter flask was inoculated with an overnight culture (2 mL in LB<sub>amp</sub>) of recombinant *E. coli*<sup>®</sup> EXPRESS BL21(DE3) cells containing a pET22b(+) plasmid encoding the non-heme iron enzyme variant. The culture was shaken at 37 °C and 250 rpm until the OD<sub>600</sub> was 0.7 (approximately 2 hours). The culture was placed on ice for 30 minutes, and isopropyl  $\beta$ -D-1-thiogalactopyranoside (IPTG) was added to final concentrations of 1 mM. The incubator temperature was reduced to 20.5 °C, and the culture was allowed to shake for 24 hours at 180 rpm. Cells were harvested by centrifugation (4 °C, 15 min, 4,000xg) and resuspended in KPi buffer (pH 7.4) and adjusted to OD<sub>600</sub> = 20. The whole-cell suspension was placed on ice and bubbled with Ar for 15 min.

**Biocatalytic synthesis of (2-(1-azidoethyl)-N-(tert-butyl)benzamide (1N) (0.75 mmol scale reaction):** Under anaerobic conditions, to a 40 mL vial were added 15 mL of *Sav* HppD Az1 whole-cell suspension (OD<sub>600</sub> = 20), ferrous ammonium sulfate (0.5 mL, 100 mM in water), sodium azide (1 mL, 1 M in water), and *N*-fluoroamide substrate **1NF** (0.5 mL, 1.5 M in DME). The vial was capped and shaken at 680 rpm in an anaerobic chamber at room temperature for 48 hours. The reaction mixture was then transferred to a 50-mL Falcon tube and mixed with 30 mL 6:4 EtOAc *via* vortexing (30 s for three times). The organic and aqueous layers were then separated via centrifugation (10,500xg, 5 min). After removal of the organic layers, two additional rounds of extraction were performed. The combined organic extracts were dried over anhydrous Na<sub>2</sub>SO<sub>4</sub>, concentrated, and purified by flash chromatography to afford pure azidation product **1N** (120 mg, 0.488 mmol, 65% yield).

**Preparative scale synthesis and one-pot derivatization of enzymatic azidation product 10:** Under anaerobic conditions, to a 20 mL vial were added 5 mL of *Sav* HppD Az1 whole-cell suspension (OD<sub>600</sub> = 20), ferrous ammonium sulfate (0.25 mL, 100 mM in water), sodium azide (0.25 mL, 1 M in water), and *N*-fluoroamide substrate **11NF** (0.125 mL, 1.5 M in DME). The vial was capped and shaken at 680 rpm in an anaerobic chamber at room temperature for 48 hours. Afterwards, a DMF solution of the alkyne (0.188 mmol, 57.8 mg) was added to the reaction mixture, which is followed by the addition of CuSO<sub>4</sub> (0.02 mmol, 3.2 mg), BTTAA ligand (0.04 mmol, 17 mg), and sodium ascorbate (0.02 mmol, 4 mg). The reaction was left in an anaerobic chamber and shaken overnight. The reaction mixture was then extracted with ethylacetate (3 × 20 mL). Removal of the organic solvent under vacuum and the crude was purified by Biotage flash chromatography to afford pure azidation product **19** as white solid (56 mg, 55% yield). **Characterization of 19:** <sup>1</sup>H NMR (300 MHz, CDCl<sub>3</sub>)  $\delta$  7.92 (s, 1H), 7.45-7.35 (m, 4H), 7.22-7.19 (m, 1H), 6.81-6.73 (m, 2H), 5.97 (brs, 1H), 5.74 (s, 2H), 5.16 (s, 2H), 2.93-2.88 (m, 2H), 2.57-2.33 (m, 2H), 2.19-1.95 (m, 6H), 1.71-1.39 (m, 14H), 0.92 (s, 3H). <sup>13</sup>C NMR (75 MHz, CDCl<sub>3</sub>)  $\delta$  220.9, 168.4, 156.3, 144.2, 137.9, 136.9, 133.1, 133.0, 132.6, 130.7, 128.9, 127.2, 126.4, 124.0, 114.8, 112.4, 62.0, 52.2, 51.3, 50.4, 48.0, 44.0, 38.3, 35.9, 31.6, 29.7, 28.8, 26.5, 25.9, 21.6, 13.9.

## X. Spectroscopic studies

**Anaerobic Techniques** Unless otherwise stated, spectroscopic samples were prepared in an MBraun UNIlab glovebox circulated under a positive pressure of N<sub>2</sub>(g). *Sav* HppD Az1 was rendered anoxic by vacuuming and sparging the protein (~7 cycles) with Ar(g) in a round bottom flask connected to a Shlenk line. All buffers and compounds were prepared within the glovebox to render a uniform anaerobic environment.

### UV-Vis Sample Preparation and Spectra Collection

UV-Vis Samples (final volume = 200  $\mu$ L) contained 350  $\mu$ M *Sav* HppD Az1, 320  $\mu$ M Fe<sup>2+</sup>, 70 mM azide, and 8.75 mM substrate in 50 mM potassium phosphate buffer pH 7.4. Stock solutions of anaerobic substrate (~100 mM), ferrous ammonium sulfate (40 mM), and 250 mM sodium azide were prepared in phosphate buffer and diluted as needed to yield the previously mentioned quantities. Reactions were initiated by spiking the respective anaerobic substrate into the generated *Sav* HppD Az1-Fe(II)-azide complex.

UV-Vis spectra were collected using an Agilent Cary 8454 spectrophotometer placed in the glovebox, which is equipped with a temperature controlled cuvette holder (set temperature 4 °C). All samples were collected within a micro quartz cuvette (12.5 mm width x 45 mm height; total size, 3 mm width x 4 mm height; optical window; 1 cm pathlength). Spectra (full traces and single wavelength) were collected and analyzed using the Agilent ChemStation software. All UV-Vis figures were created using the software SpectraGryph (<https://www.effemm2.de/spectragryph/>).

### Mössbauer Sample Preparation and Spectral Analysis

*Sav* HppD Az1 Mössbauer samples (final volume = 300  $\mu$ L) were comprised of 1 mM *Sav* HppD Az1, 0.9 mM <sup>57</sup>Fe, and varying concentrations of azide (0 – 200 mM). Specifically, samples were prepared by addition of each component to 20 mM potassium phosphate buffer pH 7.4, wherein azide was added as the final component of each sample. Following azide addition, each sample was incubated in the glovebox for 5 minutes prior to freezing under liquid nitrogen. Polyoxymethylene cups were used as sample holders for Mössbauer samples.

Mössbauer spectra were recorded with home-built Mössbauer spectrometers using Janis Research SuperVaritemp dewars. These dewars allow for studies in the temperature range of 1.5 to 200 K and applied magnetic fields up to 8 T. A LakeShore model 331A temperature controller was used to control the temperature in experiments. Spectral simulations were performed using the WMOSS software package (SEE Co., Edina, MN). Isomer shifts are quoted relative to Fe metal at room temperature. All Mössbauer figures were prepared using the software SpinCount (10).

Regarding simulations, all Mössbauer spectra were analyzed with the following Hamiltonian:

$$H = H_Q = \frac{eQV_{zz}}{4I(2I-1)} [3\hat{I}_z^2 - I(I+1) + \eta(\hat{I}_x^2 - \hat{I}_y^2)] \text{ (Equation 1)}$$

Wherein the Hamiltonian reflects the electric quadrupole interactions. Within the quadrupole Hamiltonian, Q is the quadrupole moment, V<sub>zz</sub> is the z component of the electric field gradient tensor  $\tilde{V}$ . The term I is the <sup>57</sup>Fe nuclear spin, which is I = 3/2 for the excited <sup>57</sup>Fe nuclear states,  $\eta$  is an asymmetry parameter (denoted by  $\eta = \frac{V_{xx}-V_{yy}}{V_{zz}}$ ). Spectra were fit directly with this

Hamiltonian, wherein isomer shift, quadrupole splitting, and relative area parameters were gleaned from the spectral fits.

### **Sav HppD Az1 Reaction EPR Sample Preparation**

Typical enzymatic reaction EPR samples consisted of a 300  $\mu$ L mixtures of 300  $\mu$ M *Sav* HppD Az1, 270  $\mu$ M  $\text{Fe}^{2+}$ , 7.5 mM non-ethyl substrate, and 60 mM sodium azide within 50 mM sodium phosphate pH 7.4. Stock solutions of anaerobic HppD (~1 mM protein), ~100 mM non-ethyl substrate, 25 mM ferrous ammonium sulfate, and 250 mM sodium azide were all diluted in phosphate buffer to yield the previously mentioned working concentrations. Following addition of the substrate analog, **18NF**, samples were incubated anaerobically at 4  $^{\circ}$ C prior to freezing in liquid  $\text{N}_2(l)$ .

X Band EPR spectra were collected with a Bruker ELEXYS-II E500 EPR spectrometer equipped with an Oxford ESR-910 liquid helium cryostat. The signal was quantified relative to a previously prepared Cu(II)(EDTA) spin standard. The microwave frequency was calibrated with a frequency counter, while the magnetic field was calibrated with an NMR gaussmeter. Unless specifically specified, the following standard parameters were used for each EPR spectrum: 100 kHz modulation frequency, 5 G modulation amplitude, 150 ms conversion time, 9.63 GHz microwave frequency. Each sample was analyzed at an appropriate microwave power and sample temperature to satisfy non saturating conditions. EPR spectra were simulated, and each signal was quantified using the software SpinCount (10). During simulations, all intensity factors both theoretical and experimental were considered to quantify each signal.

### **Sav HppD Az1 Reaction EPR Spectral Analysis**

Analysis of the EPR spectra of the *Sav* HppD Az1 reaction with the substrate analog, **17NF**, displays that the mononuclear iron in *Sav* HppD Az1 is in the  $S = 5/2$  high spin Fe(III) state. Simulations were therefore analyzed using the following spin Hamiltonian:

$$\hat{H} = D \left[ \vec{S}_z^2 - \frac{35}{12} + \left( \frac{E}{D} \right) (\vec{S}_x^2 - \vec{S}_y^2) \right] + \beta \vec{S} \cdot \vec{g} \cdot \vec{B} \quad (\text{Equation 2})$$

Within equation 2,  $D$  and  $E$  correspond to the axial and rhombic zero-field splitting (ZFS) terms. The coordinates ( $x$ ,  $y$ , and  $z$ ) delineate the principal axes of the zero-field splitting tensor. The remaining terms have their usual definitions:  $\beta$  is the electron Bohr magneton,  $S$  is the spin vector,  $B$  is the magnetic field vector, and  $\vec{g}$  is the  $g$  tensor. The  $E/D$  parameter may be used to measure the characteristics of the electronic environment associated with the system in question. In this instance, we may use it to survey the iron in *Sav* HppD Az1 as its electronic characteristics lie between fully axial ( $E/D = 0$ ) and fully rhombic ( $E/D = 0.333$ ) symmetry. Spectral simulations allow for determination of the  $E/D$  parameter of each spectra recorded. Furthermore, the intensity of the observed EPR signals may be examined at multiple temperatures to determine saturation conditions as well as the value of  $D$ . Following the calculations of the  $E/D$  and  $D$  values, correlation of spectra features to spin quantifications were accomplished via simulations with double integration methods.

### **Sav HppD Az1 NO Adduct EPR Sample Preparation**

*Sav* HppD Az1 NO containing EPR samples comprised 250  $\mu$ L solutions of 250  $\mu$ M *Sav* HppD Az1, 225  $\mu$ M  $\text{Fe}^{2+}$ , 2.5 mM ascorbate, 2.5 mM NO(g), and variable amounts of azide (0-50 mM) and the substrate, **1NF** (0 or 6.25 mM). A saturated stock NO(g) containing solution was generated by dissolving DEA NONOate (Sigma Aldrich) powder in phosphate buffer and

incubating for ~10 minutes at room temperature. Samples were prepared by addition of all the previously mentioned components prior to NONOate solution addition. Each sample was incubated for ~15 minutes prior to DEA NONOate solution addition. Following NO addition, each sample was incubated for an additional 5 minutes prior to freezing in liquid N<sub>2</sub>(l).

### **Sav HppD Az1 NO Adduct EPR Simulation Analysis**

EPR spectra were collected in a manner identical to that which was described in the “Sav HppD Az1 Reaction EPR Sample Preparation section.” The {FeNO}<sup>7</sup> S = 3/2 species was analyzed by using the following spin Hamiltonian:

$$\hat{H} = \vec{S} \cdot \vec{D} \cdot \vec{S} + \beta \vec{S} \cdot \vec{g} \cdot \vec{B} = D \left[ \vec{S}_z^2 - \frac{15}{4} + \left( \frac{E}{D} \right) (\vec{S}_x^2 - \vec{S}_y^2) \right] + \beta \vec{S} \cdot \vec{g} \cdot \vec{B} \text{ (Equation 3)}$$

Where, in a similar manner to the previously discussed S = 5/2 Hamiltonian, E and D are the rhombic and axial ZFS terms, β is the electron Bohr magneton, S is the spin vector, B is the applied magnetic field vector, and  $\vec{g}$  is the g tensor. E/D, D, and species concentrations were obtained using methods identical to those described in the previous “Sav HppD Az1 Reaction EPR Spectral Analysis” section utilizing the S = 3/2 Hamiltonian.

### **Comments on the Spectroscopic Analysis**

Mössbauer spectroscopic measurements were carried out to provide spectroscopic evidence on the anion binding to the Fe(II) center of Sav HppD Az1. The Mössbauer spectrum of the sample containing the Sav HppD Az1•Fe(II) complex exhibited a major quadrupole splitting feature at 4.2 K. The spectral simulation suggested that this spectral feature can be best simulated by two quadrupole doublets with the parameters δ<sub>1</sub> = 1.30 mm/s |ΔE<sub>Q1</sub>| = 3.41 mm/s, δ<sub>2</sub> = 1.32 mm/s |ΔE<sub>Q2</sub>| = 3.02 mm/s (Fig. 4A and Fig. S5 left panel A). The parameters suggest that the two quadrupole doublets, which represent 55% (Species I) and 45% (Species 2) of the total iron in the sample, are typical high-spin ferrous species. Upon addition of 200 equivalents (relative to the protein concentration) of N<sub>3</sub><sup>-</sup> in the form of NaN<sub>3</sub>, clear spectral changes were observed (Fig. S5 left panel B). By taking a difference spectrum between that of the Sav HppD Az1•Fe(II) complex and that of the putative Sav HppD Az1•Fe(II)•N<sub>3</sub> complex, the spectral differences can be clearly visualized (Fig. S5 left panel C). The upward peaks and the downward peaks in the difference spectrum represent the disappeared and the appeared species upon N<sub>3</sub><sup>-</sup> treatment. The spectral simulations suggested that the Species I (δ<sub>1</sub> = 1.31 mm/s |ΔE<sub>Q1</sub>| = 3.41 mm/s, Fig. S5 left panel D, blue solid line) observed in the sample containing the Sav HppD Az1•Fe(II) complex was mostly converted (-45%) to two new quadrupole doublets (Fig. S5 left panel D, purple and yellow lines) having the Mössbauer parameters of δ<sub>3</sub> = 1.20 mm/s |ΔE<sub>Q3</sub>| = 2.29 mm/s, δ<sub>4</sub> = 1.17 mm/s |ΔE<sub>Q4</sub>| = 2.97 mm/s, which represent 17% and 25% of the iron, respectively. The two new species are also typical of high-spin ferrous species and likely to be the Sav HppD Az1•Fe(II)•N<sub>3</sub> complex. We also carried out the Mössbauer analysis on the same set of samples prepared by another batch of purified protein (Fig S5 right panel). The overall spectral results are the same. Namely the Sav HppD Az1•Fe(II) complex is represented by two high-spin ferrous quadrupole doublets with isomer shift ~ 1.3 mm/s, and only one of the two ferrous quadrupole doublets can be converted to two new ferrous quadrupole doublets representing the putative Sav HppD Az1•Fe(II)•N<sub>3</sub> complex. In addition, subtle changes of the Mössbauer simulation parameters could be observed between the two batches of protein, which might be due to certain batch-to-batch variation (Table S5). In summary, the Mössbauer spectra suggest that ~40% of iron centers in the sample containing the Sav HppD Az1•Fe(II) complex can be converted to the putative azide bound species. We also incubated the Sav HppD Az1•Fe(II) complex with 200 equivalents (relative to the protein concentration) of Cl<sup>-</sup> or Br<sup>-</sup> in



the form of NaCl or NaBr, no obvious spectral changes could be observed (Fig S6), which suggests that the binding of Cl<sup>-</sup> and Br<sup>-</sup> to the Fe(II) center may be much weaker than those induced by N<sub>3</sub><sup>-</sup>. This could be a possible reason why only N<sub>3</sub><sup>-</sup> can lead to the observed reactivity in *Sav* HppD Az1.

To further search for evidence to support the direct interactions between N<sub>3</sub><sup>-</sup>, the substrate **1NF** and the iron center of *Sav* HppD Az1, we carried out EPR measurements on samples treated with nitric oxide (NO). The addition of NO to Fe(II) center can lead to the formation of  $S = 3/2$  {FeNO}<sup>7</sup> species. The spectroscopic features of this {FeNO}<sup>7</sup> species is sensitive to the ligation change and the surrounding environment change of the iron center in protein (11). The addition of NO to the *Sav* HppD Az1•Fe(II) complex led to the formation of a  $g \sim 4$  resonance in the EPR spectrum, which is a typical  $S = 3/2$  {FeNO}<sup>7</sup> species with the rhombic zero field splitting parameter  $E/D \sim 0.014$  based on the spectral simulation (Fig S7). The addition of N<sub>3</sub><sup>-</sup> caused the  $g \sim 4$  resonance to broaden with the corresponding increase of the  $E/D$  value to  $\sim 0.018$  (Fig S7). The further addition of **1NF** caused the additional broadening of the  $g \sim 4$  resonance with further increase of the  $E/D$  value to 0.024 (Fig S7). These spectroscopic changes observed upon N<sub>3</sub><sup>-</sup> and **1NF** treatment provide evidence that the iron center of *Sav* HppD Az1 interacts with N<sub>3</sub><sup>-</sup> and **1NF**.

In order to demonstrate an Fe(III)-N<sub>3</sub> species in *Sav* HppD Az1 is formed and is involved in the reaction, we used **18NF** to incubate with the enzyme. We reasoned that **18NF** could still generate the *N*-centered radical via F• transfer to the Fe(II) center. However, the absence of the ethyl group would abolish the HAT step as well as the following N<sub>3</sub><sup>-</sup> rebound step thus leave the iron center at the Fe(III) state with bound N<sub>3</sub><sup>-</sup>. Indeed, the addition of **18NF** to the *Sav* HppD Az1•Fe(II)•N<sub>3</sub> complex under anaerobic condition resulted a slow accumulation of a red species with optical absorption features centered at 505 nm (Fig 4B and Scheme S5). This optical spectrum is reminiscent to that of the Fe(III)-N<sub>3</sub> complex found in the ferric superoxide dismutase (See ref 25 in the main text). Omission of N<sub>3</sub><sup>-</sup> or the enzyme in the treatment did not generate such an optical spectrum, thus strongly suggesting the observed chromophore is likely to be originated from the Fe(III)-N<sub>3</sub> ligand-to-metal charge transfer band, which is generated by an enzyme bound Fe(III)-N<sub>3</sub> species. We further used EPR measurements to verify the iron oxidation state of this red species. The EPR signal of this red species was located at  $g \sim 4.3$  (Fig 4A), thus confirming the iron oxidation state as high spin ( $S = 5/2$ ) Fe(III). The simulation parameters are  $g = [1.96, 2.00, 2.03]$ ,  $D = 0.5 \text{ cm}^{-1}$ ,  $E/D = 0.26$ . Also consistent with the Mössbauer results that  $\sim 40\%$  of the *Sav* HppD Az1•Fe(II) complex can be converted to the putative azide bound species, the amount of Fe(III)-N<sub>3</sub> generated is  $\sim 33\%$  of the total Fe-loaded enzyme based on the spin quantification. In addition to generate Fe(III) species when **18NF** is used to react with the *Sav* HppD Az1•Fe(II) complex, an amidyl radical should also be formed simultaneously. Due to the instability of the amidyl radical, such species was not observed in EPR. However, a minor stable organic radical centered at  $g = 2$  was observed instead (Scheme S6). This stable radical could be the secondary radical formed via the quench of the initial amidyl radical. This assertion is further supported by the fact that the stable radical could only be observed when the *Sav* HppD Az1•Fe(II) complex is incubated with **18NF** (Scheme S6).

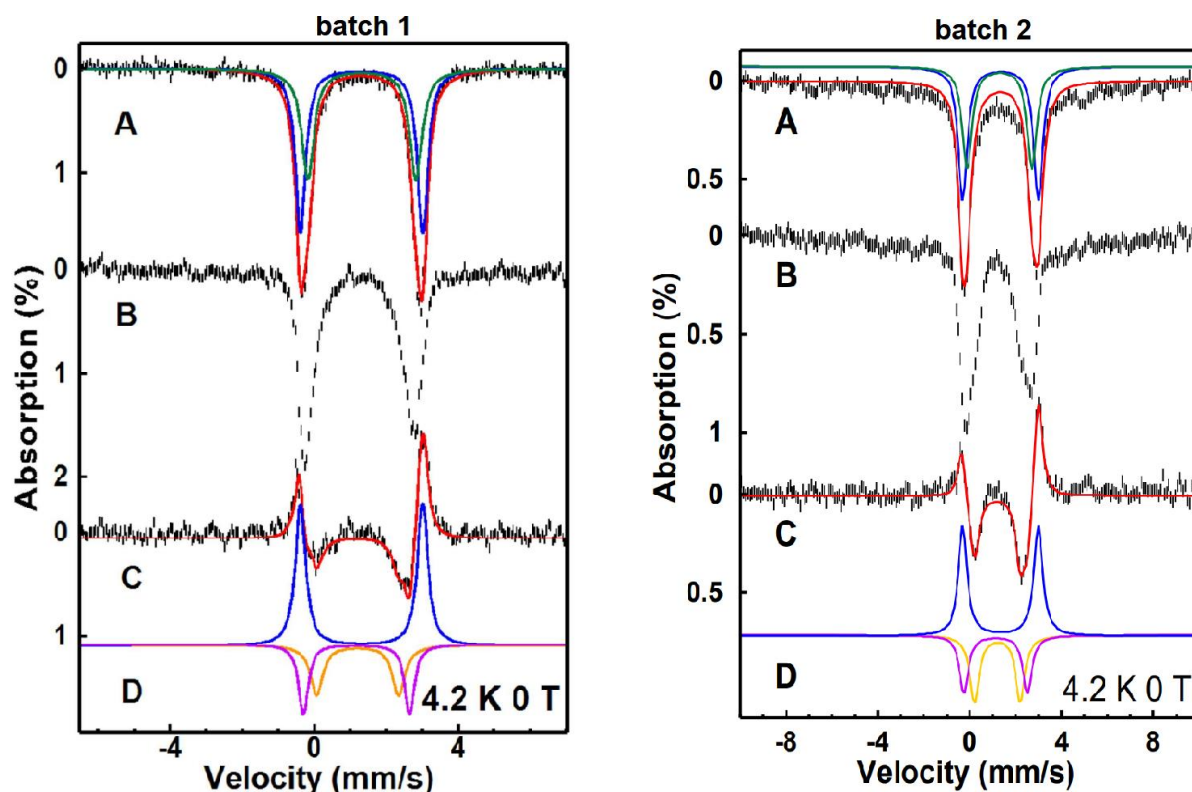

**Figure S5. Left panel:** Zero field 4.2 K Mössbauer spectra (black) and the corresponding simulations (colored lines) of the *Sav* HppD Az1•Fe(II) complex with and without NaN<sub>3</sub> prepared from batch 1 of the purified protein. (A) The spectrum of a sample containing the *Sav* HppD Az1•Fe(II) complex. The overall spectral simulation (red) and the simulated spectral components (blue and green) are overlaid with the experimental data. (B) The spectrum of a sample containing the *Sav* HppD Az1•Fe(II) complex treated with NaN<sub>3</sub>. (C) The difference spectrum (black) obtained by subtracting spectrum (A) from spectrum (B). The overall simulation (red) is overlaid with the experimental data. (D) The simulated spectral components of the simulation shown in (C). The simulation parameters and detailed discussion are included in the SI section, “Comments on the Spectroscopic Analysis”, and Table S5. **Right panel:** Zero field 4.2 K Mössbauer spectra (black) and the corresponding simulations (colored lines) of the *Sav* HppD Az1•Fe(II) complex with and without NaN<sub>3</sub> prepared from batch 2 of the purified protein. (A) The spectrum of a sample containing the *Sav* HppD Az1•Fe(II) complex. The overall spectral simulation (red) and the simulated spectral components (blue and green) are overlaid with the experimental data. (B) The spectrum of a sample containing the *Sav* HppD Az1•Fe(II) complex treated with NaN<sub>3</sub>. (C) The difference spectrum (black) obtained by subtracting spectrum (A) from spectrum (B). The overall simulation (red) is overlaid with the experimental data. (D) The simulated spectral components of the simulation shown in (C). The simulation parameters and detailed discussion are included in the SI section, “Comments on the Spectroscopic Analysis”, and Table S5. The broad absorption distributed in the baseline in (A) and (B) represents ~ 25% of the total absorption, which may be due to the mononuclear ferric impurity exist in this set of samples and generated by O<sub>2</sub> contaminant.

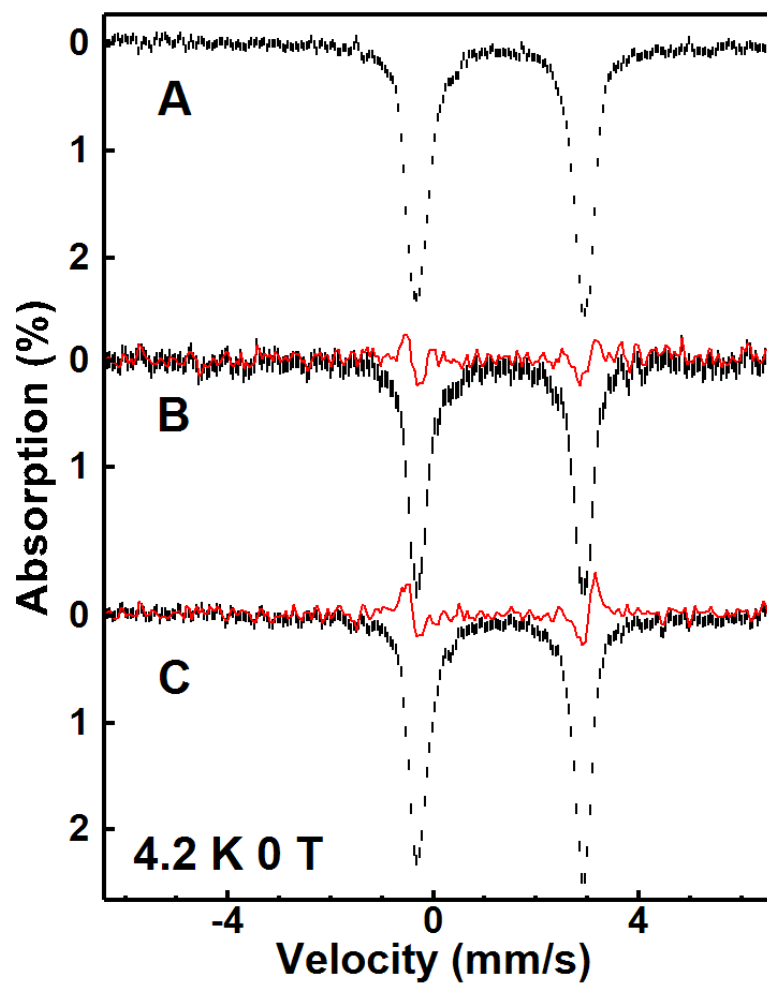

**Figure S6.** Zero field 4.2 K Mössbauer spectra (black) and the associated difference spectra (red) of the *Sav* HppD Az1•Fe(II) complex with and without the presence of anions chloride and bromide. (A) The spectrum of a sample comprised of *Sav* HppD Az1•Fe(II) complex. (B) The spectrum of a sample of *Sav* HppD AQAH•Fe(II) complex supplemented with 200 mM sodium chloride. The difference spectrum (red) displays the result of subtracting spectrum (A) from spectrum (B). (C) The spectrum of a sample of *Sav* HppD Az1•Fe(II) complex treated with 200 mM sodium bromide. The difference spectrum (red) conveys the results of subtracting spectrum (A) from spectrum (C).

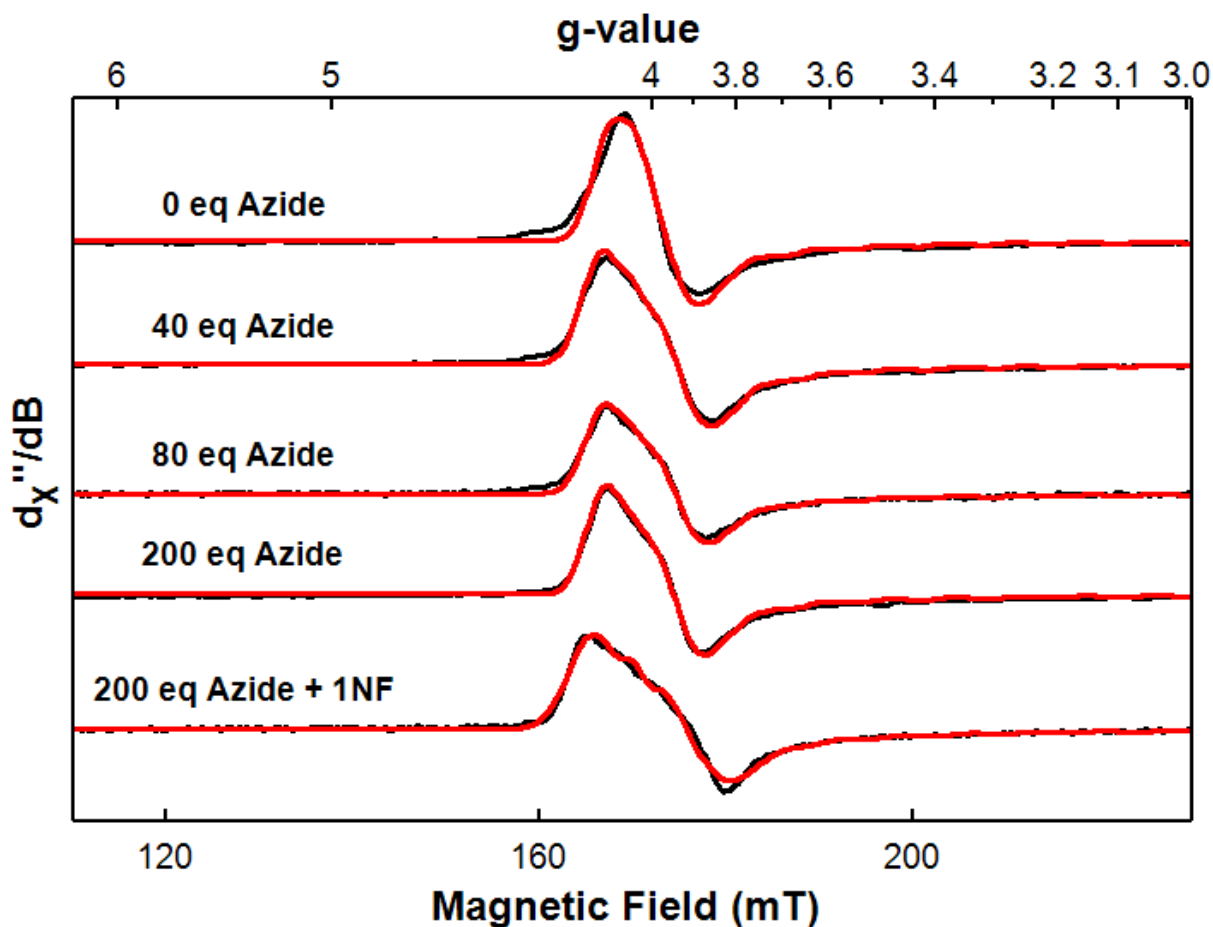

**Figure S7.** X-band EPR spectra (black solid lines) of samples containing the *Sav* HppD Az1•Fe complex with the addition of NO and different amounts of azide in the form of sodium azide with and without the presence of **1NF**. All spectra were measured at  $T = 12$  K. The red solid lines are the spectral simulation. The measurement conditions as well as the simulation procedures were described in the SI section, “*Sav* HppD Az1 NO Adduct EPR Simulation Analysis”. The simulation parameters can be found in Table S6.

**Scheme S5.** Optical absorption spectra of the *Sav* HppD Az1•Fe(II) complex with **18NF** (grey), the *Sav* HppD Az1•Fe(II)•N<sub>3</sub> complex with **18NF** (black), the *Sav* HppD Az1•Fe(II) complex incubated with **18NF** for 60 min (green), and the *Sav* HppD Az1•Fe(II)•N<sub>3</sub> complex incubated with **18NF** for 60 min (red).

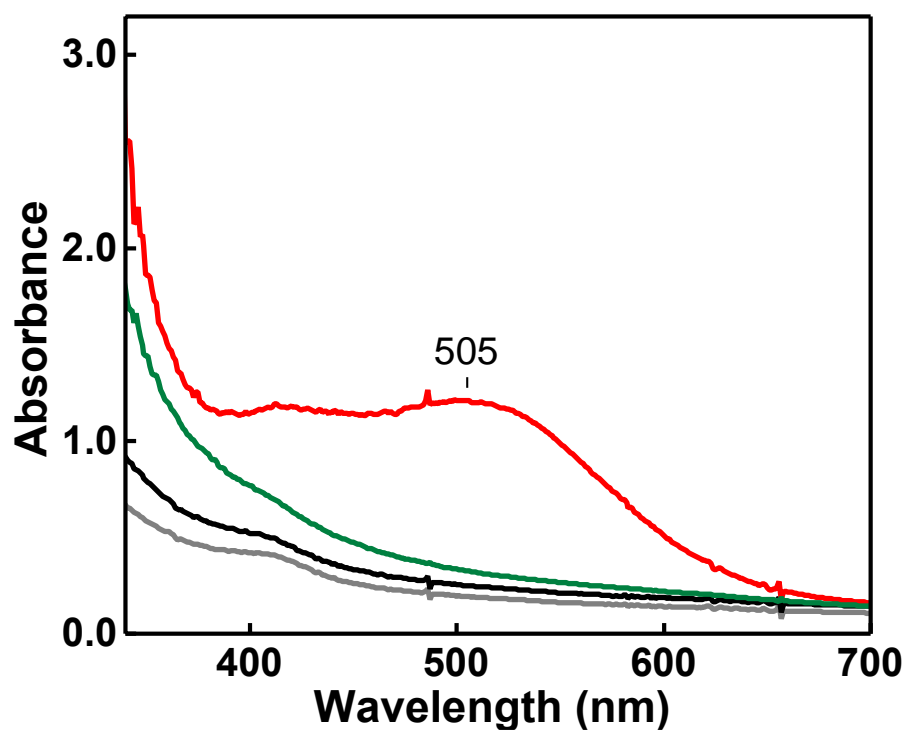

**Scheme S6.** X-band EPR spectra (black) of the *Sav* HppD Az1•Fe(II) complex incubated with **18NF** (top trace) or with **1NF** (middle traces) after 5 minutes, and the *Sav* HppD Az1•Fe(II) complex alone (bottom traces). The left panel shows the EPR spectra measured at the low field region, the right panel shows the EPR spectra measured at the high field region. The red traces are the spectral simulations of the  $g = 4.3$  signal using the parameters listed in the SI section, “Comments on the Spectroscopic Analysis”. The EPR signal at  $g \sim 2$  showing nuclear hyperfine structure belongs to  $\text{Mn}^{2+}$  impurity, which has a spin concentration less than  $2 \mu\text{M}$ . The sharp  $g = 2$  signal belongs to a stable organic radical.

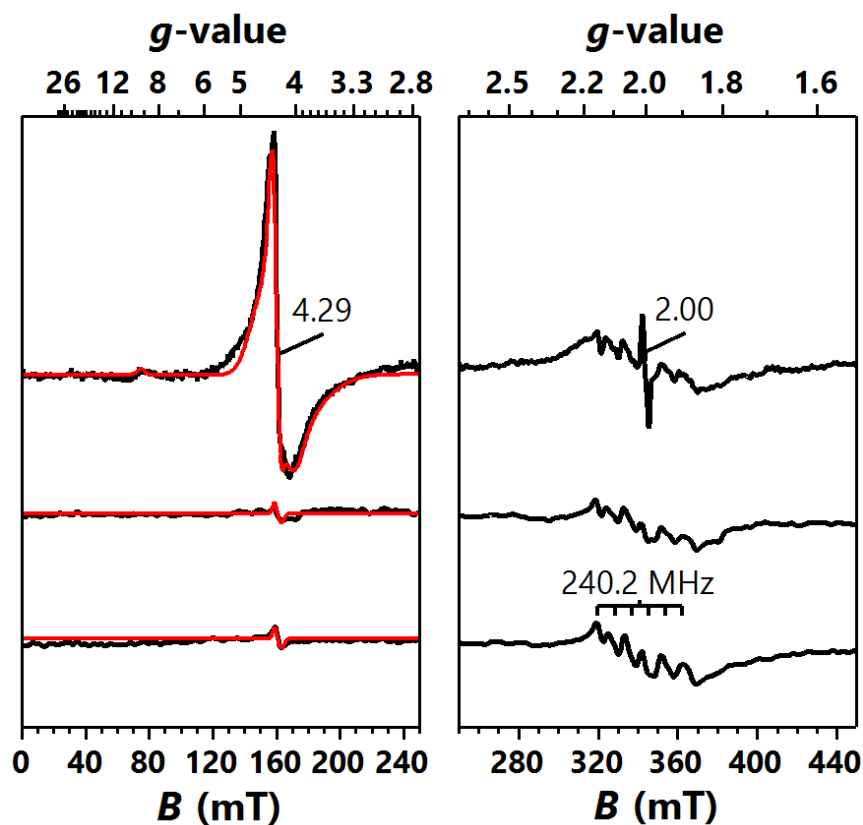

**Table S5.** Mössbauer simulation parameters of the *Sav* HppD Az1•Fe(II) complex and the *Sav* HppD Az1•Fe(II)•N3 complex prepared from two batches of purified protein.

| Protein Batch  | Spectrum                                                       | Species     | $\delta$ (mm/s) | $\Delta E_Q$ (mm/s) | Relative Area (%) |
|----------------|----------------------------------------------------------------|-------------|-----------------|---------------------|-------------------|
| <b>Batch 1</b> | <i>Sav</i> HppD Az1•Fe(II)                                     | Species I   | 1.30            | 3.41                | 55                |
|                |                                                                | Species II  | 1.32            | 3.02                | 45                |
|                | Difference spectrum after N <sub>3</sub> <sup>-</sup> addition | Species I   | 1.30            | 3.4                 | -45               |
|                |                                                                | FeII-N3(I)  | 1.20            | 2.29                | 17                |
|                |                                                                | FeII-N3(II) | 1.17            | 2.97                | 25                |
| <b>Batch 2</b> | <i>Sav</i> HppD Az1•Fe(II)                                     | Species I   | 1.35            | 3.28                | 40                |
|                |                                                                | Species II  | 1.31            | 2.82                | 35                |
|                | Difference spectrum after N <sub>3</sub> <sup>-</sup> addition | Species I   | 1.35            | 3.28                | -35               |
|                |                                                                | FeII-N3(I)  | 1.23            | 2.00                | 18                |
|                |                                                                | FeII-N3(II) | 1.15            | 2.76                | 13                |

**Table S6.** EPR simulation parameters of the  $S = 3/2$  species.

|                            | <b>0 eq Azide</b> | <b>40 eq Azide</b> | <b>80 eq Azide</b> | <b>200 eq Azide</b> | <b>200 eq Azide + S</b> |
|----------------------------|-------------------|--------------------|--------------------|---------------------|-------------------------|
| <b>g<sub>z</sub></b>       | 2.00              | 2.00               | 2.00               | 2.00                | 2.00                    |
| <b>g<sub>x</sub></b>       | 2.015             | 2.017              | 2.016              | 2.016               | 2.017                   |
| <b>g<sub>y</sub></b>       | 2.015             | 2.017              | 2.016              | 2.016               | 2.017                   |
| <b>D (cm<sup>-1</sup>)</b> | 6                 | 6                  | 6                  | 6                   | 6                       |
| <b>E/D</b>                 | 0.0145            | 0.0184             | 0.0175             | 0.0168              | 0.0234                  |
| <b>Conc. (mM)</b>          | 0.20              | 0.24               | 0.17               | 0.20                | 0.27                    |

Note: *D* and *g<sub>z</sub>* values were fixed for the above simulations.

## XI. Computational Modelling

**Quantum Mechanics (QM) calculations.** Density Functional Theory (DFT) calculations were employed to study the azidation mechanism of **1NF** to **1N** using a computational truncated model. The truncated model  $[\text{Fe}^{2+}(\text{N}_3^-)(\text{H}_2\text{O})(\text{Ac}^-)(\text{Im})_2(\mathbf{1NF})]$  includes a ferrous metal center ( $\text{Fe}^{2+}$ ) coordinated to an acetate ( $\text{Ac}^-$ ) and two imidazoles (Im) to mimic the iron coordination sphere as observed in *Sav* HppD enzyme active site (Glu349, His187 and His270), an azide ion ( $\text{N}_3^-$ ), and a coordinating water molecule as well as the substrate (**1NF**). The initial structure used to generate this truncated model was obtained from a representative snapshot of a MD trajectory. All DFT calculations were carried out using Gaussian09 software package (12). The (U)B3LYP functional was used (13-15), together with 6-31G(d) basis set for all atoms except for Fe, where SDD basis set and related SDD pseudopotential were used with an *ultrafine* integration grid. CPCM polarizable conductor model (diethyl ether,  $\epsilon = 4.3$ ) (16, 17) was used to provide an estimation of the dielectric permittivity of the enzyme active site (18). All the optimized stationary point geometries were characterized by frequency calculations, verifying that only transition states geometries had a single imaginary frequency consistent with the reaction coordinate. Enthalpies and entropies were calculated at 1 atm and 298.15 K. A correction to the harmonic oscillator approximation, as proposed by Truhlar and co-workers (19, 20), was also applied to the enthalpy by raising all frequencies below  $100 \text{ cm}^{-1}$  to  $100 \text{ cm}^{-1}$  using Goodvibes v.3.0.1 python script (21). Single point energy calculations were performed using the functional (U)B3LYP with the Def2TZVP basis set on all atoms and an *ultrafine* integration grid, and including CPCM polarizable conductor model corrections (diethyl ether,  $\epsilon = 4.3$ ). All structures have a total neutral charge and calculations were performed considering the triplet (T) and quintet (Q) multiplicities, which are energetically accessible for the Fe species. Figures were rendered using CYLview (22).

**Molecular Dynamics (MD) simulations.** The available *Sav* HppD X-ray monomeric structure (chain B, PDB: 1T47) without the NTBC inhibitor was used as starting point. Variant Az2 was generated by introducing 7 mutations (V189A, N191A, S230L, P243G, N245F, Q255P, L367I) to the X-ray structure using PyMOL (23). Molecular Dynamics (MD) simulations in explicit water were performed using the AMBER18 package (24). Parameters for the **1NF** substrate were generated within the Antechamber module from AMBER18 package using the general AMBER force field (gaff2) (25), with partial charges set to fit the electrostatic potential generated at the HF/6-31G(d) level by the RESP model (26). The charges were calculated according to the Merz–Singh–Kollman scheme (27, 28) using Gaussian 09 (12). Parameters for the  $\text{Fe}^{2+}$  ion and its coordinating residues were obtained using the Metal Center Parameter Builder (MCPB.py) (29), following the protocols implemented in AMBER18 package. The coordination sphere of the ferrous metal center includes His187, His270, Glu349, and the azide ion ( $\text{N}_3^-$ ). Two water molecules were added to fill the octahedral coordination of the metal, which were treated using a restrained nonbonded model.

The proteins were solvated in a pre-equilibrated cubic box with a  $10\text{-\AA}$  buffer of TIP3P (30) water molecules using the AMBER18 leap module, resulting in the addition of  $\sim 13,250$  solvent molecules. Explicit counterions ( $\text{Na}^+$  or  $\text{Cl}^-$ ) were introduced to neutralize the system. All subsequent calculations were done using the Stony Brook modification of the Amber14 force field (*ff14SB*) (31). A two-stage geometry optimization approach was used. The first stage minimizes the positions of solvent molecules and ions imposing positional restraints on solute by a harmonic potential with a force constant of  $500 \text{ kcal mol}^{-1} \text{ \AA}^{-2}$ , and the second stage is an unrestrained minimization of all the atoms in the simulation cell. The system was gently heated



using six 50 ps steps, incrementing the temperature by 50 K for each step (0–300 K) under constant-volume and periodic-boundary conditions. Water molecules were treated using the SHAKE algorithm, where the angle between the hydrogen atoms was kept fixed. Long-range electrostatic effects were modelled using the particle-mesh-Ewald method (32). An 8 Å cutoff was applied to Lennard–Jones and electrostatic interactions. Harmonic restraints of 30 kcal·mol<sup>-1</sup> were applied to the solute, and the Langevin scheme was used to control and equalize the temperature. The time step was kept at 1 fs during the heating stages, allowing potential inhomogeneities to self-adjust. Each system was then equilibrated for 2 ns with a 2 fs time step at a constant pressure of 1 atm and temperature of 300 K without restraints. Once the systems were equilibrated in the NPT ensemble, production trajectories were then run under the NVT ensemble and periodic-boundary conditions. In particular, a total of 4,500 ns (4.5 μs) in the absence of substrate were accumulated for *Sav* HppD, and Az2 variants from 6 independent replicas (3x 1,000 ns + 3x 500 ns) for each system. Cpptraj (33) module from AmberTools utilities was used to process and analyze the trajectories. Protein structures were rendered using PyMOL (34).

**Docking and substrate-bound MD simulations.** The most representative structures from the azide-bound simulations were characterized by clustering of the accumulated trajectories, considering the protein backbone RMSD. These structures were used for docking calculations with substrate **1NF**, which were performed using AutoDock Vina (35) after removing one water molecule bonded to the metal center to preserve its octahedral coordination. Docking results were used as starting points for constrained-MD simulations, in which the distance between the F atom from **1NF** substrate and the Fe center was kept restrained (3–3.2 Å, using a 50 kcal·mol<sup>-1</sup>·Å<sup>-2</sup> force constant). This allowed to explore catalytically relevant binding poses of the substrate, largely refining the docking predictions, and preventing undesired unbinding events. The same protocol previously described for MD simulations was applied. A total of 6 independent replica of 1,000 ns of production trajectory each were accumulated for each system (6x 1,000 ns for each system). These simulations led to observe the spontaneous C-terminal α-helix open-to-close conformational change in the wt *Sav* HppD enzyme, which is believed to have an impact on the enzyme catalytic activity. Consequently, 6 additional and independent replicas of 500 ns each were carried out starting from the C-terminal α-helix closed state in all systems (additional 6x 500 ns for each system, in the closed state). Therefore, a total of 9 μs of MD simulation time for **1NF** substrate-bound in wt *Sav* HppD and Az2 variant were accumulated, allowing the exploration of the open-to-close state transitions and the full characterization of near attack conformations for N–F activation.

**Figure S8. DFT model calculations exploring two possible azide coordination modes.** DFT calculations using a computational truncated model  $[\text{Fe}(\text{N}_3^-)(\text{Ac})(\text{Im})_2(\text{H}_2\text{O})_2]$  were used to study two different coordination modes for the azide ion (mode 1 and 2). **(A)** Computed relative energies in terms of electronic energy ( $\Delta E$ ), enthalpy ( $\Delta H$ ), and quasi-harmonic corrected Gibbs energy ( $\Delta G$ ). Energy values were obtained at the (U)B3LYP/Def2TZVP/PCM(diethyl-ether)//(U)B3LYP/6-31G(d)+SDD(Fe)/PCM(diethylether) level. Energies are referred considering the lowest in energy quintet coordination mode 1 as zero. All energies are given in  $\text{kcal}\cdot\text{mol}^{-1}$ . **(B)** Optimized geometries for the two coordination modes computationally explored. Distances and angles are given in Angstrom ( $\text{\AA}$ ) and degrees ( $^\circ$ ), respectively.

**A**

| Structure           | Electronic State | $\Delta E$ | $\Delta H$ | $\Delta G$ |
|---------------------|------------------|------------|------------|------------|
| Coordination mode 1 | triplet (T)      | 16.6       | 17.5       | 19.9       |
|                     | quintet (Q)      | 0.0        | 0.0        | 0.0        |
| Coordination mode 2 | triplet (T)      | 16.3       | 16.5       | 17.6       |
|                     | quintet (Q)      | 2.5        | 2.7        | 3.8        |

**B**

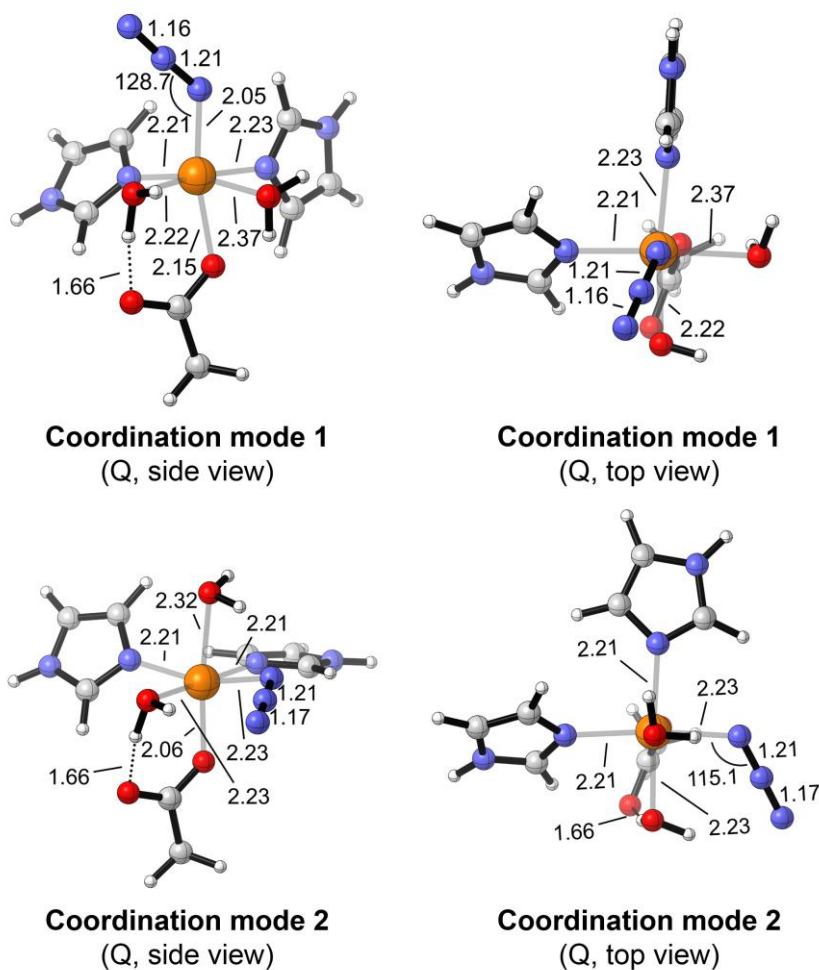

Azide coordination *trans* to the acetate (Aspartic) ligand (coordination mode 1) is intrinsically more favorable since it reduces the repulsion between the two anions. The quintet spin state is energetically much more stable than the triplet electronic state.

**Figure S9.** DFT relaxed scan calculations investigating the azide rotation when coordinated to Fe. **(A)** A computational truncated model  $[\text{Fe}(\text{N}_3^-)(\text{Ac})(\text{Im})_2(\text{H}_2\text{O})_2]$  (as described in **Figure S8**) was used. The lowest in energy azide conformation is shown, with the  $\angle\text{N}(\text{Im})\text{-Fe-N1-N2}$  dihedral angle explored highlighted in blue. **(B)** Relaxed potential energy surface (PES) corresponding to the rotation of the  $\angle\text{N}(\text{Im})\text{-Fe-N1-N2}$  dihedral angle. Electronic energies were obtained at the (U)B3LYP/6-31G(d)+SDD(Fe)/PCM(diethyl ether) level and in the quintet electronic state. Energies and dihedrals are given in  $\text{kcal}\cdot\text{mol}^{-1}$  and degrees ( $^\circ$ ), respectively.

**A**

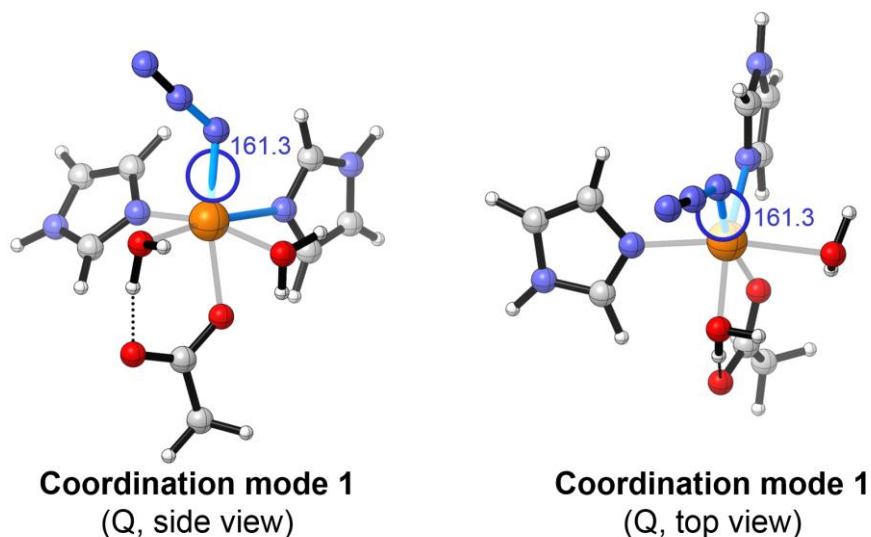

**B**

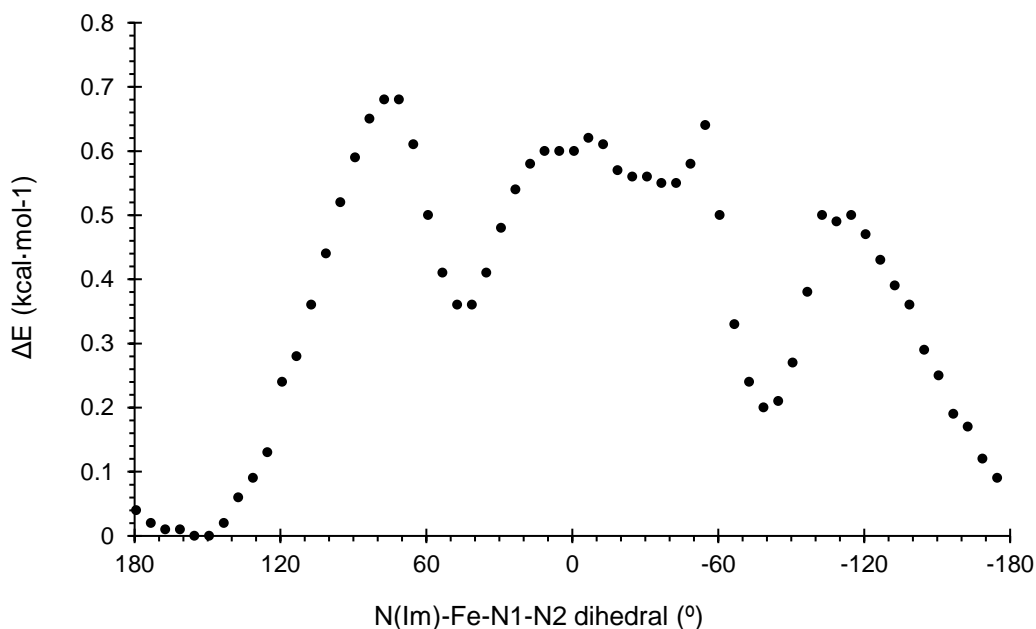

Relaxed scan calculations show that the azide can rotate freely when coordinated to the Fe center.

**Figure S10. Exploration of azide coordination in wt *Sav* HppD and HppD Az2 intermediate variant from MD simulations.** Representative structures of the most populated conformational states characterized from clustering analyses of MD simulations (3 replicas of 500 ns each, 1,500 ns for each system) of the Fe-N<sub>3</sub> complex in two different coordination modes in: (A) wt *Sav* HppD; and (B) HppD Az2 variant. Blue surfaces describe the solvent-accessible area in the active site cavity. Structures from coordination mode 1 were used for docking calculations.

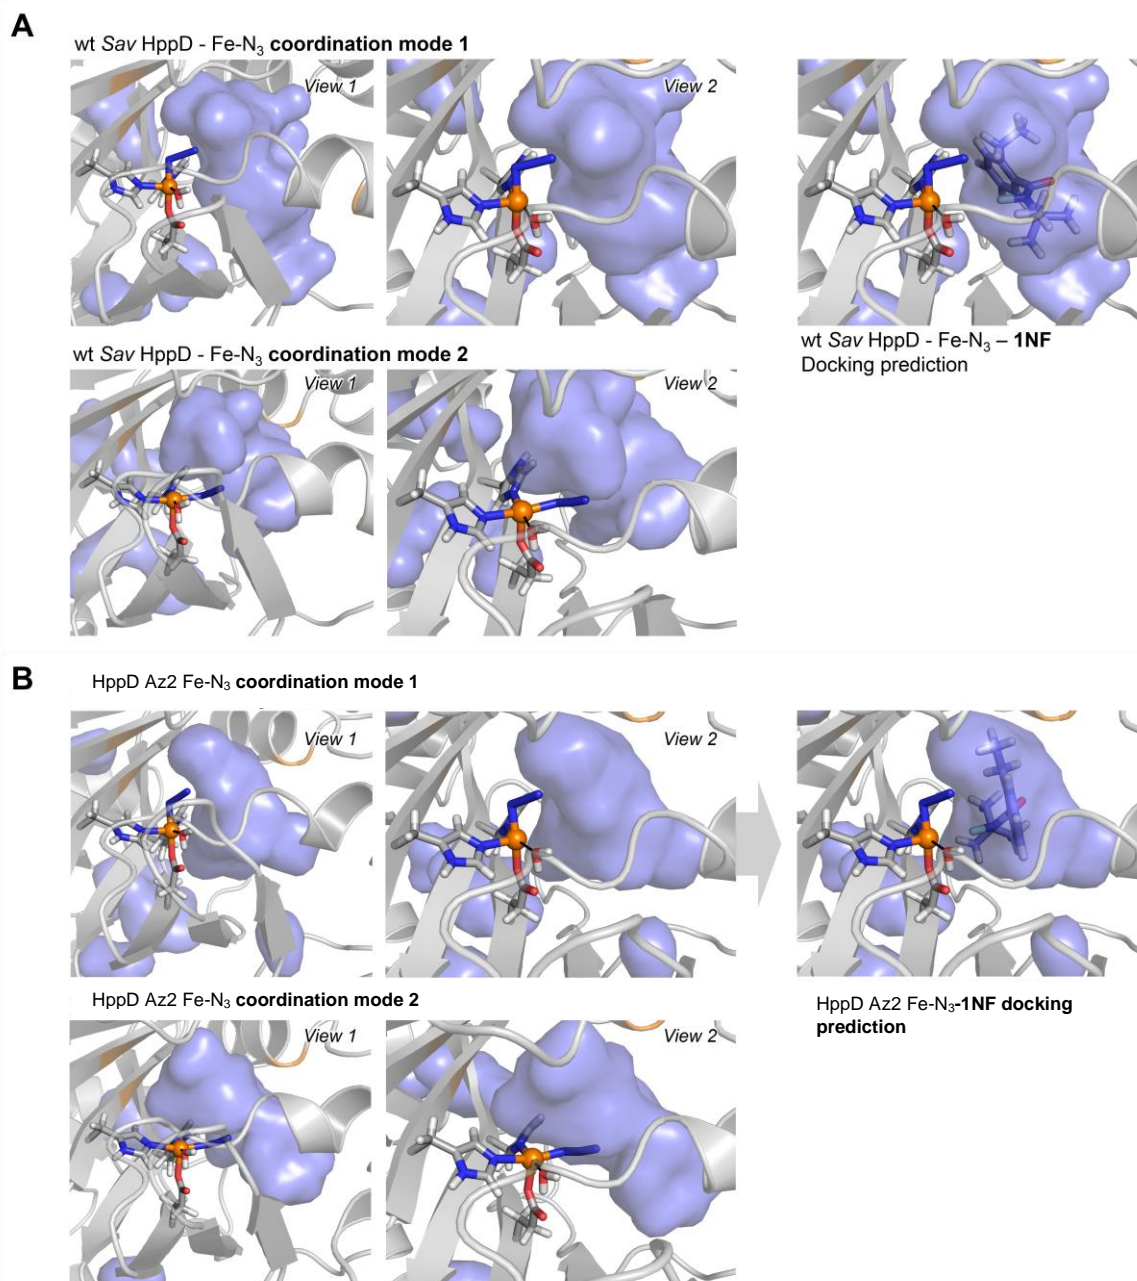

Coordination mode 1 of the Fe-N<sub>3</sub> complex in wt *Sav* HppD allows the effective approach of the **1NF** substrate to the Fe catalytic center in a near attack conformation for N-F activation. Coordination mode 2 does not allow it. Coordination mode 1 is intrinsically energetically more favorable than coordination mode 2 (**Figure S8**). In order to promote and improve the azide binding within this coordination mode, residues that are in proximity to the azide group in this region of the active site were selected for saturation mutagenesis (see **Figure 2** in the main text).

**Figure S11. MD simulations on wt *Sav* HppD – Fe-N<sub>3</sub>.** 3 independent replicas (replica 1, 2 and 3) of MD simulations of 500 ns each were carried out to analyze the relative orientation of azide and the H-bond interactions occurring between active site residues in wt *Sav* HppD – Fe-N<sub>3</sub>. Distances and dihedral angles explored along MD trajectories are all described in the included schematic figures. All distances, dihedral angles, and simulation time are given in Å, deg., and ns, respectively. **(A)**  $\angle N_{\epsilon}(\text{His270})\text{-Fe-N1-N2}$  dihedral angle explored along MD trajectories, which describes the relative orientation of the azide in wt *Sav* HppD active site. **(B)** H-bond interactions analyzed as the distances between the donor and acceptor atoms of active site residues in wt *Sav* HppD–Fe-N<sub>3</sub>.

**A**

Dihedral  $N_{\epsilon}(\text{His270})\text{-Fe-N1-N2} \approx 150^{\circ}$

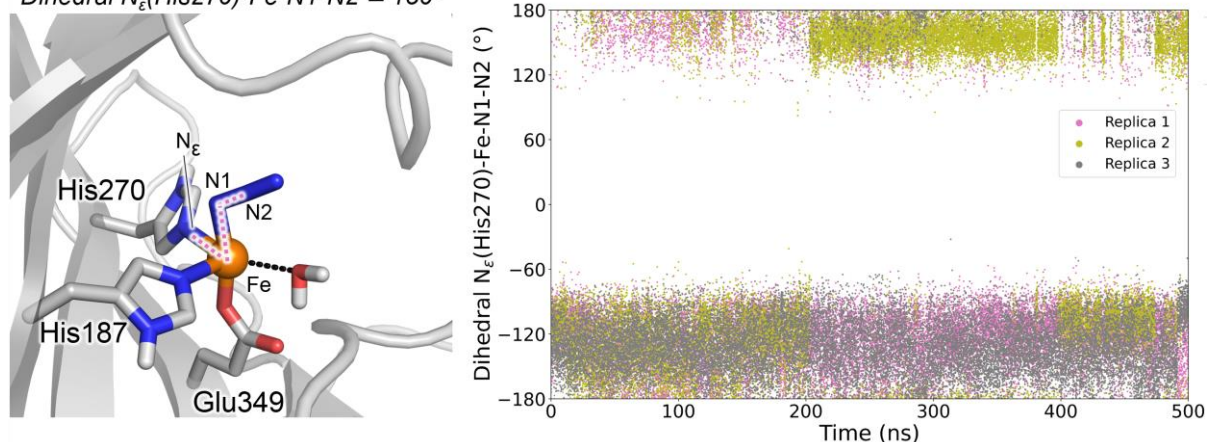

**B**

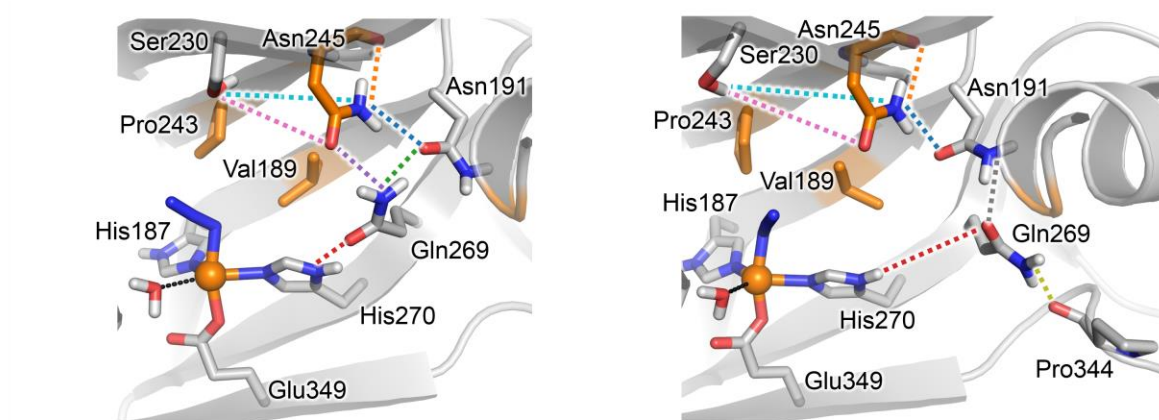

Replica 1

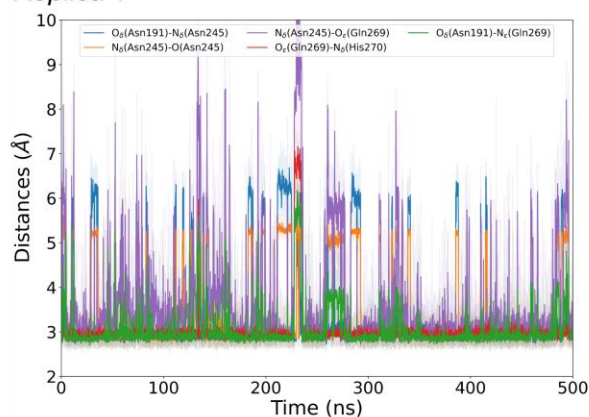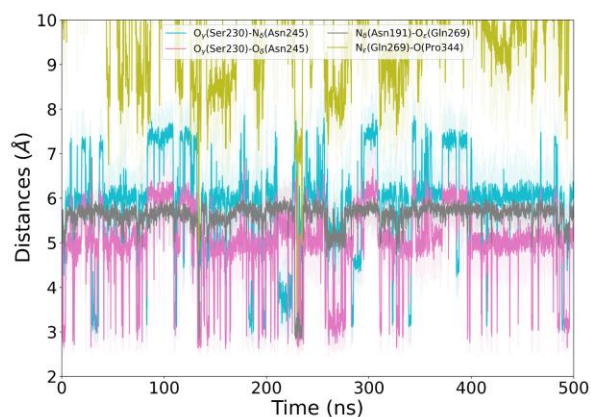

### Replica 2

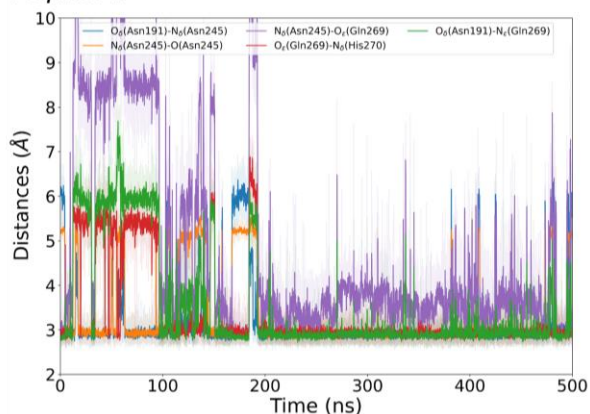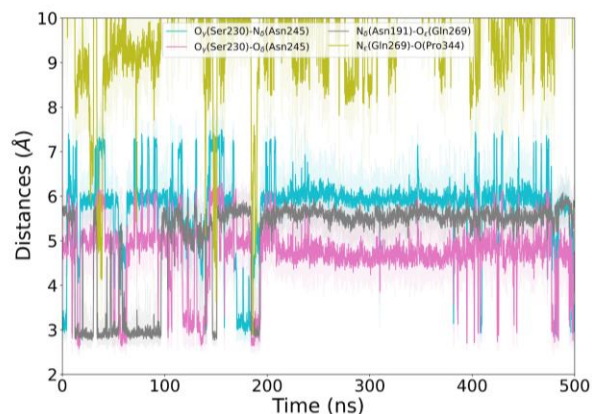

### Replica 3

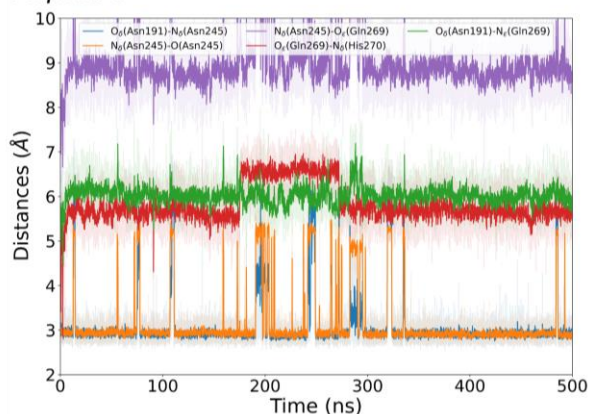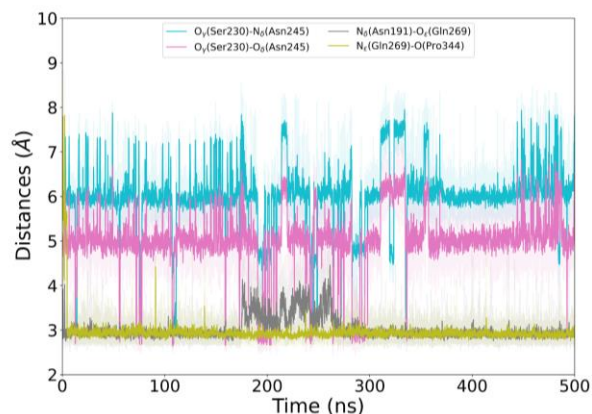

MD simulations describe that azide is predominantly oriented opposite to the catalytic His270 when coordinated to the Fe. Replicas 1 and 2 describe strong H-bond interactions between Gln269 and His270 (in red), while at the same time Gln269 interacts with Asn191 and Asn245 sidechains (in green and purple, respectively). In all replicas, Asn245 establishes H-bond interaction with Asn191 sidechain (in dark blue). No relevant interactions are observed involving Ser230. The apolar Pro243 and Val183 side chains are surrounding the azide anion.

**Figure S12. MD simulations on HppD Az2 – Fe-N<sub>3</sub>.** 3 independent replicas (replica 1, 2 and 3) of MD simulations of 500 ns each were carried out to analyze the relative orientation of azide and the H-bond interactions occurring between active site residues in HppD Az2 – Fe-N<sub>3</sub>. Distances and dihedral angles explored along MD trajectories are all described in the included schematic figures. All distances, dihedral angles, and simulation time are given in Å, deg., and ns, respectively. **(A)**  $\angle N_{\epsilon}(\text{His270})\text{-Fe-N1-N2}$  dihedral angle explored along MD trajectories, which describes the relative orientation of the azide in HppD Az2 active site. **(B)** H-bond interactions analyzed as the distances between the donor and acceptor atoms of active site residues in HppD Az2 – Fe-N<sub>3</sub>.

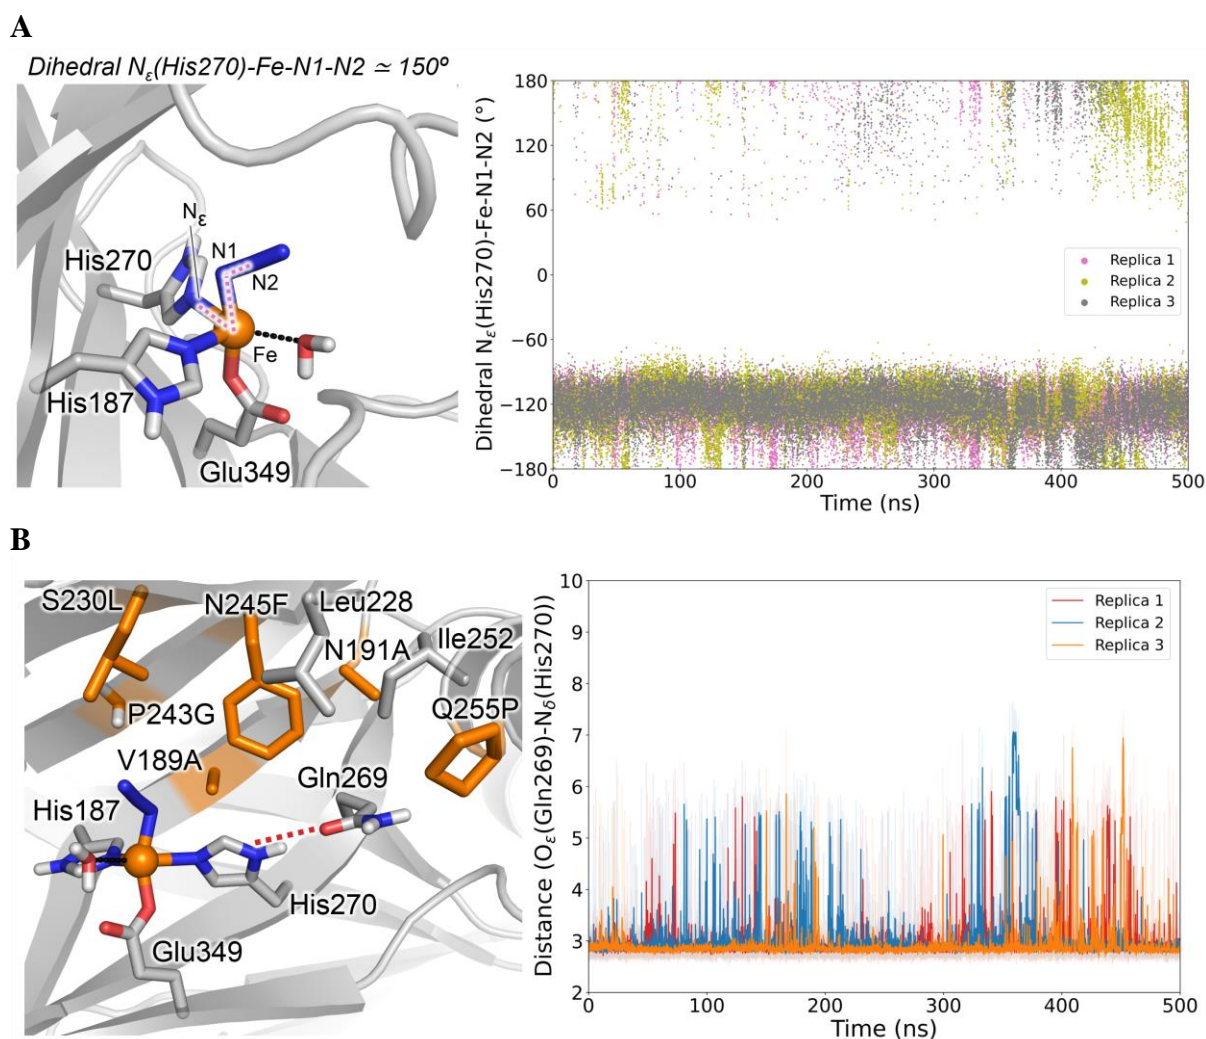

MD simulations describe that the coordinated azide in Az2 variant is oriented opposite to the catalytic His270, similarly to wt *Sav* HppD enzyme (see **Figure S11**). New introduced mutations (V189A, N191A, S230L, P243G, N245F, Q255P and L367I) increase the hydrophobicity of the active site, and disrupt the original active site H-bond network. The only persistent polar interaction observed in Az2 active site is a H-bond established by His270 and Gln269. Simulations showed that V189A and P243G generated more space to accommodate and stabilize the iron-bound azide in this region of the active site.

**Figure S13. MD simulations on substrate-bound wt *Sav* HppD enzyme.** 3 independent replicas (replica 1, 2 and 3) of constrained-MD simulations of 500 ns each were carried out to characterize catalytically relevant binding poses of **1NF** substrate bound in a near attack conformation for N–F activation in the closed state wt *Sav* HppD active site with the azide coordinated to the iron. Distances and dihedral angles explored along MD trajectories are all described in the included schematic figures. All distances, dihedral angles, and simulation time are given in Å, deg., and ns, respectively. **(A)** Distances explored along MD trajectories between **1NF** N-atom and pro-*R* H ( $H_R$ , red) and pro-*S* H ( $H_S$ , green) atoms, respectively, from **1NF** ethyl group. **(B)** Distances explored along MD trajectories between **1NF** C-atom from the ethyl group (C(Et)) and azide N1 (orange) and N3 (blue) atoms, respectively. **(C)**  $\angle N(\text{Im})\text{-Fe-N1-N2}$  dihedral angle explored along MD trajectories, which describes the relative orientation of the azide in wt *Sav* HppD active site. **(D)** Relative conformations explored by **1NF** substrate along MD trajectories as defined by  $\angle C(\text{tBu})\text{-N-C1(Ph)-C2(Ph)}$  and  $\angle N_\epsilon(\text{His270})\text{-Fe-N-C}(\text{tBu})$  dihedral angles. These two dihedrals describe: i) the relative orientation of **1NF** with respect to the Fe-azide active species ( $\angle N_\epsilon(\text{His270})\text{-Fe-N-C}(\text{tBu})$ ); and ii) the relative orientation of **1NF** ethyl group ( $\angle C(\text{tBu})\text{-N-C1(Ph)-C2(Ph)}$ ). **(E)** Representative selected snapshots that describe the geometries that **1NF** explores when bound in a near attack conformation for N–F activation in wt *Sav* HppD active site, as observed from MD trajectories. Star markers describe the positioning of each selected snapshot on the respective MD trajectory.

**A**

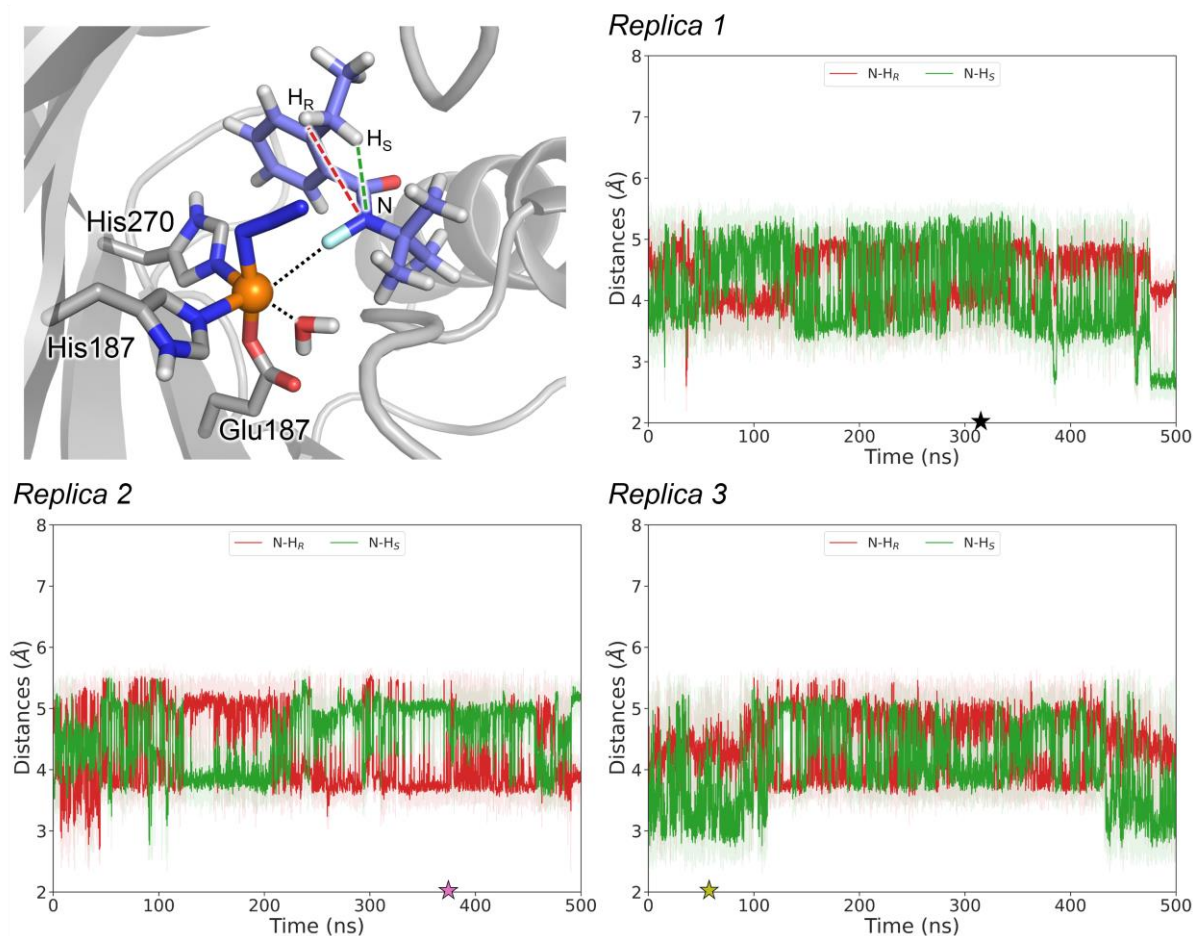



**B**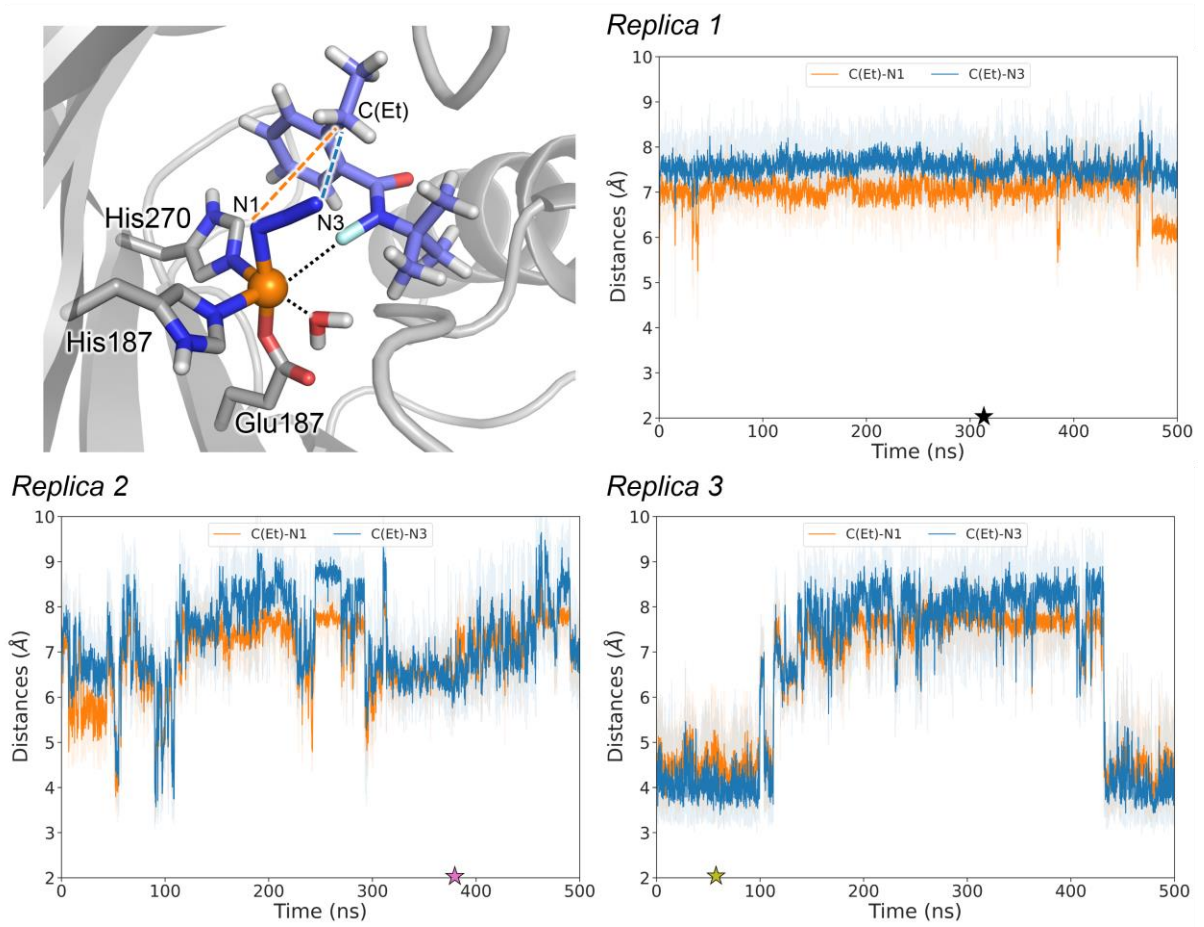**C**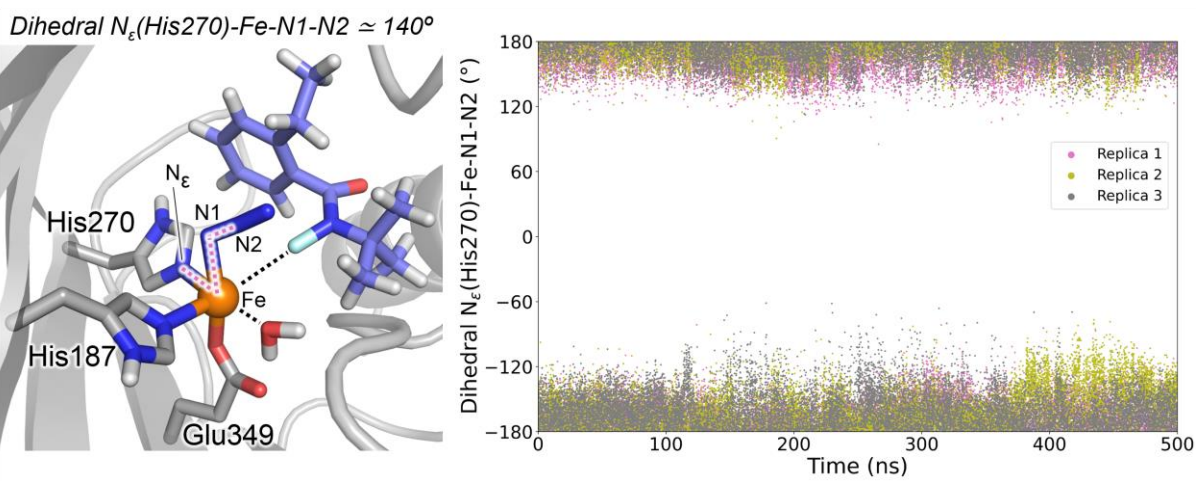

**D**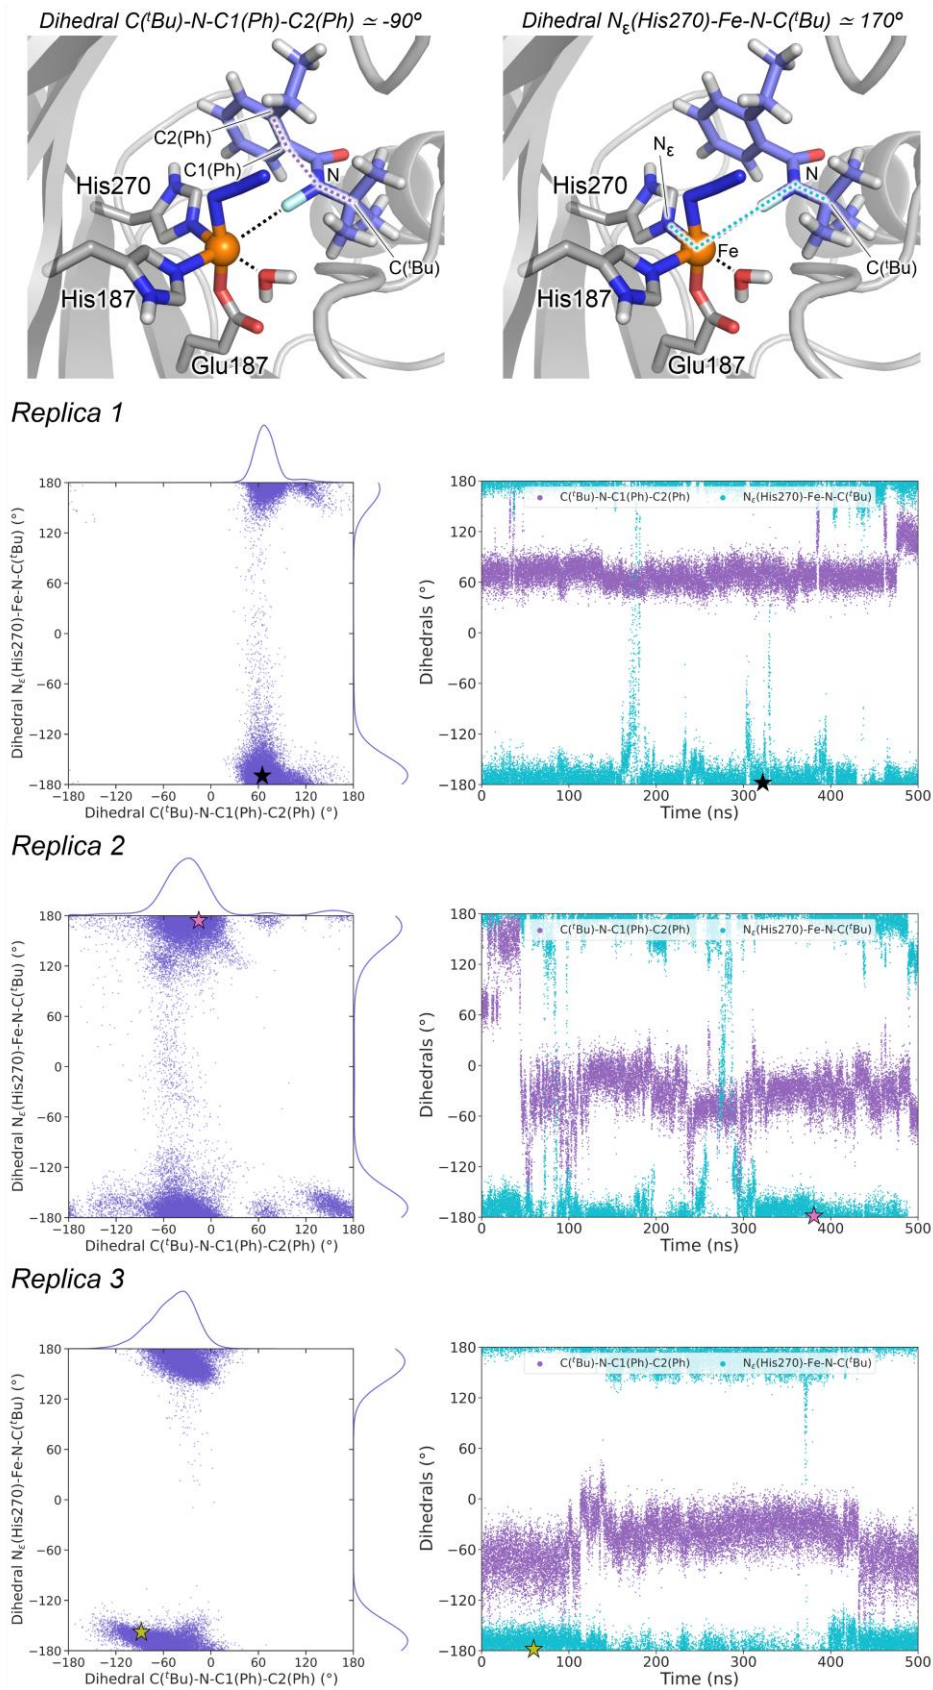

**E**

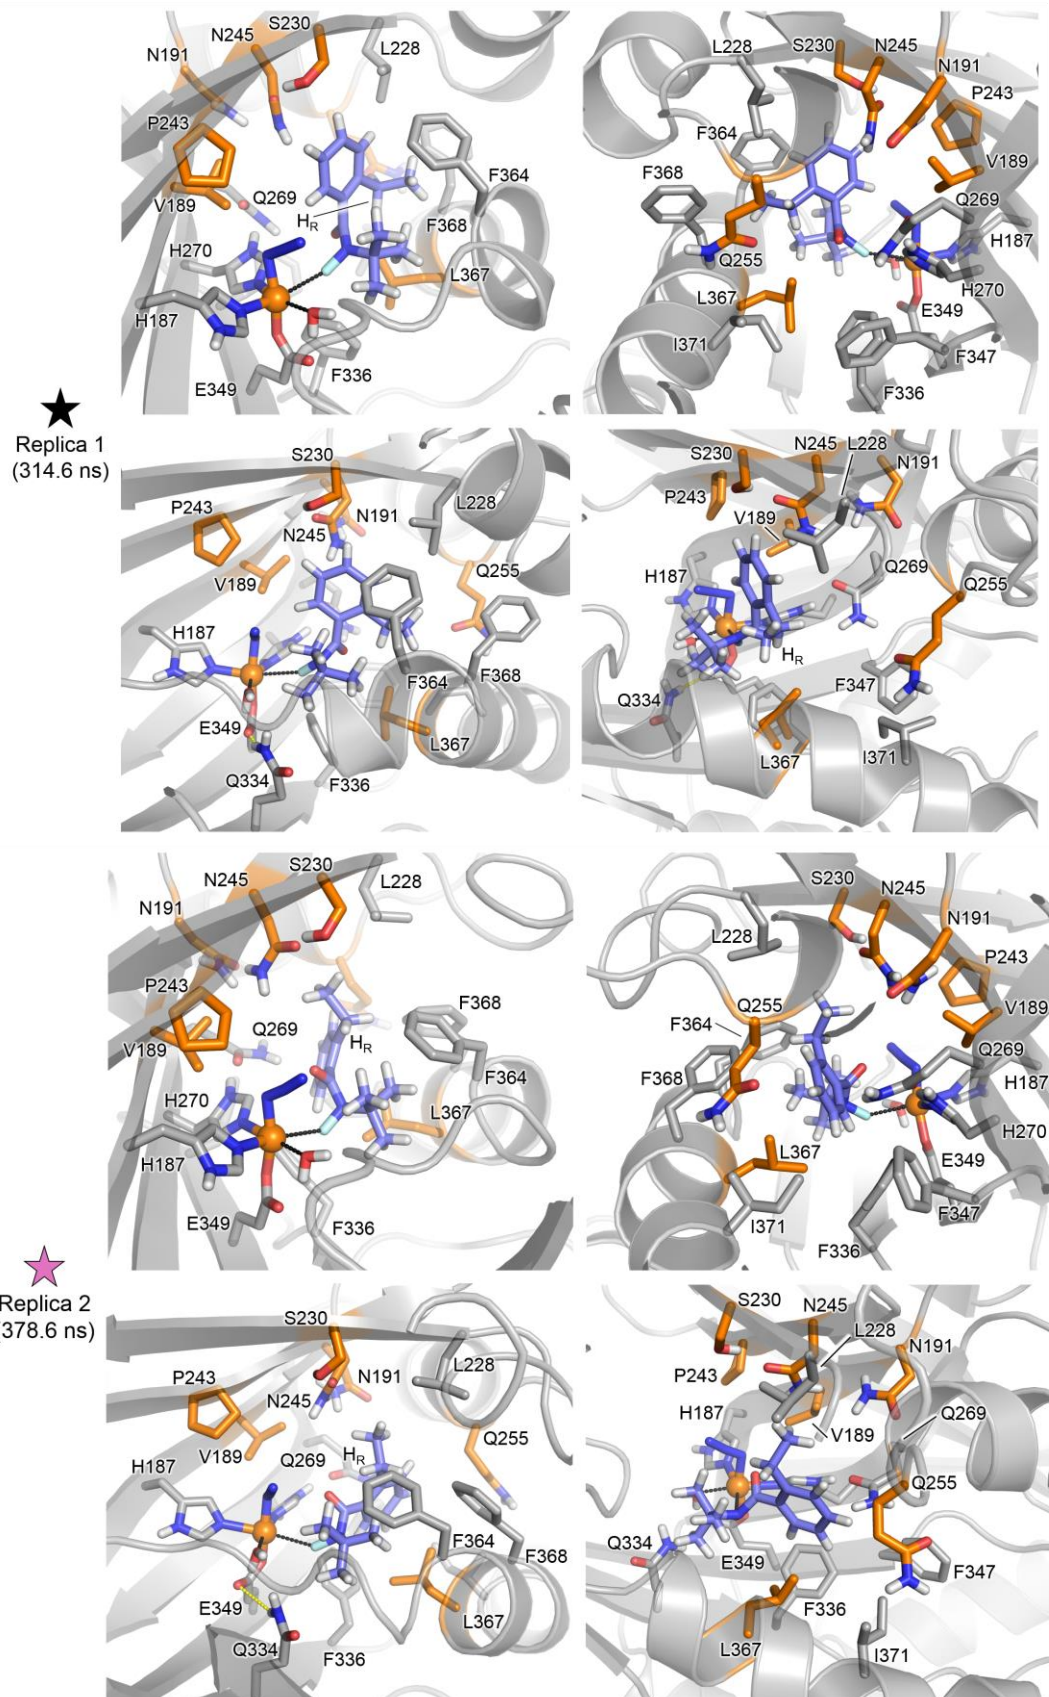

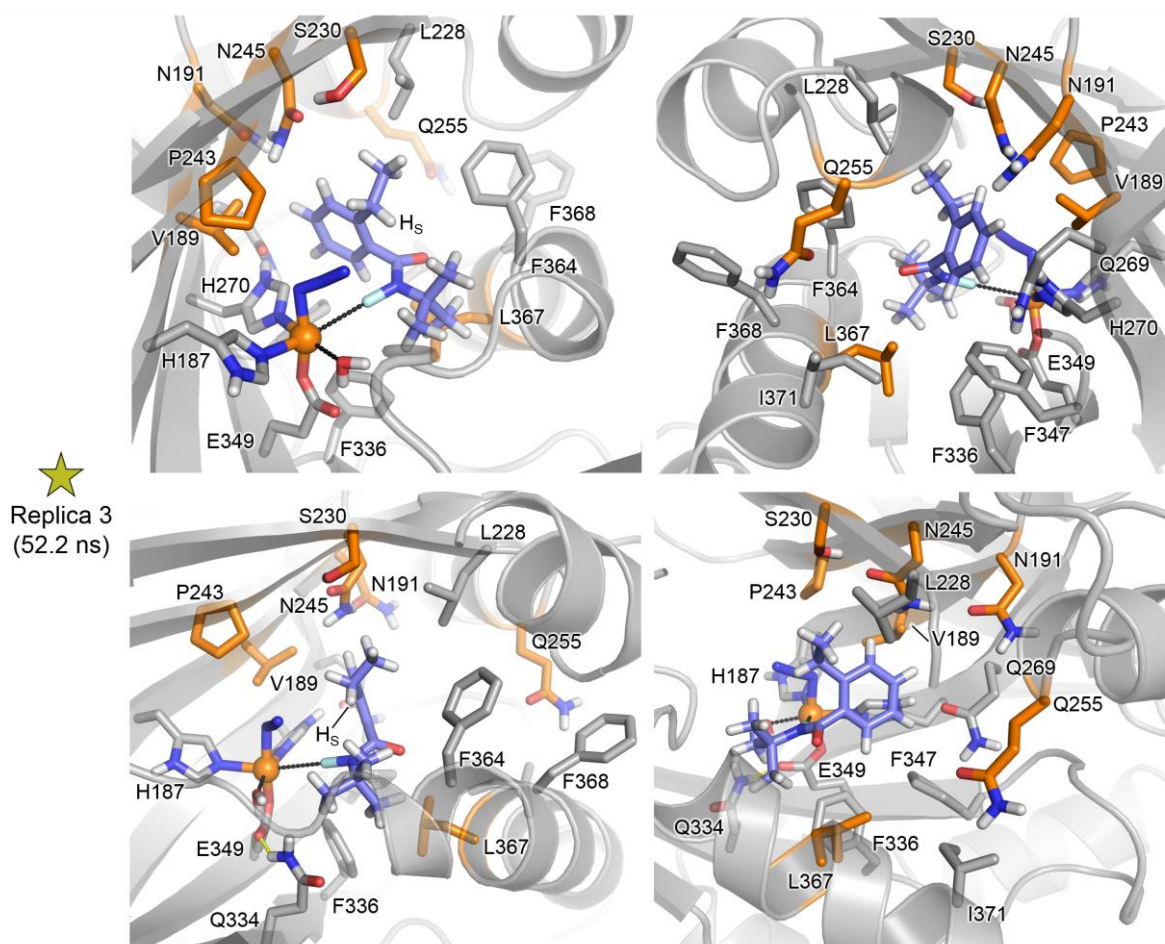

MD simulations show that when **1NF** binds in a catalytically competent pose for N–F activation in wt *Sav* HppD active site, it mainly explores conformations in which its relative orientation respect to the Fe-azide ( $\angle N_{\epsilon}(\text{His270})\text{-Fe-N-C}(\text{tBu})$ ) remains more or less constant (**Figure S13-D** and **E**). However, the ethyl group and the phenyl ring ( $\angle N_{\epsilon}(\text{His270})\text{-Fe-N-C}(\text{tBu})$ ) are found to be quite flexible, exploring alternative conformations (**Figure S13-D**). Consequently, the ethyl group is not kept always close to the azide (**Figure S13-B**), and both  $H_R$  and  $H_S$  atoms can be equally oriented toward the substrate N-atom (**Figure S13-A**). This is indicating a lack of preorganization for the HAT step, which rapidly takes place once the fluorine atom is transferred to the Fe. The azide orientation is kept constant; it doesn't explore alternative conformations during the MD trajectories (**Figure S13-C**). This orientation is similar to the one observed for the azide in the MD simulations without the substrate.

**Figure S14. H-bond network analysis in wt *Sav* HppD – Fe-N<sub>3</sub> – 1NF active site explored by MD simulations.** H-bond interactions analyzed as the distances between the donor and acceptor atoms of active site residues in closed state wt *Sav* HppD – Fe-N<sub>3</sub> with substrate 1NF bound in a near attack conformation for N-F activation. 3 independent replicas (replica 1, 2 and 3) of MD simulations of 500 ns each are analyzed. Distances explored along MD trajectories are all described in the included schematic figures. All distances and simulation time are given in Å and ns, respectively.

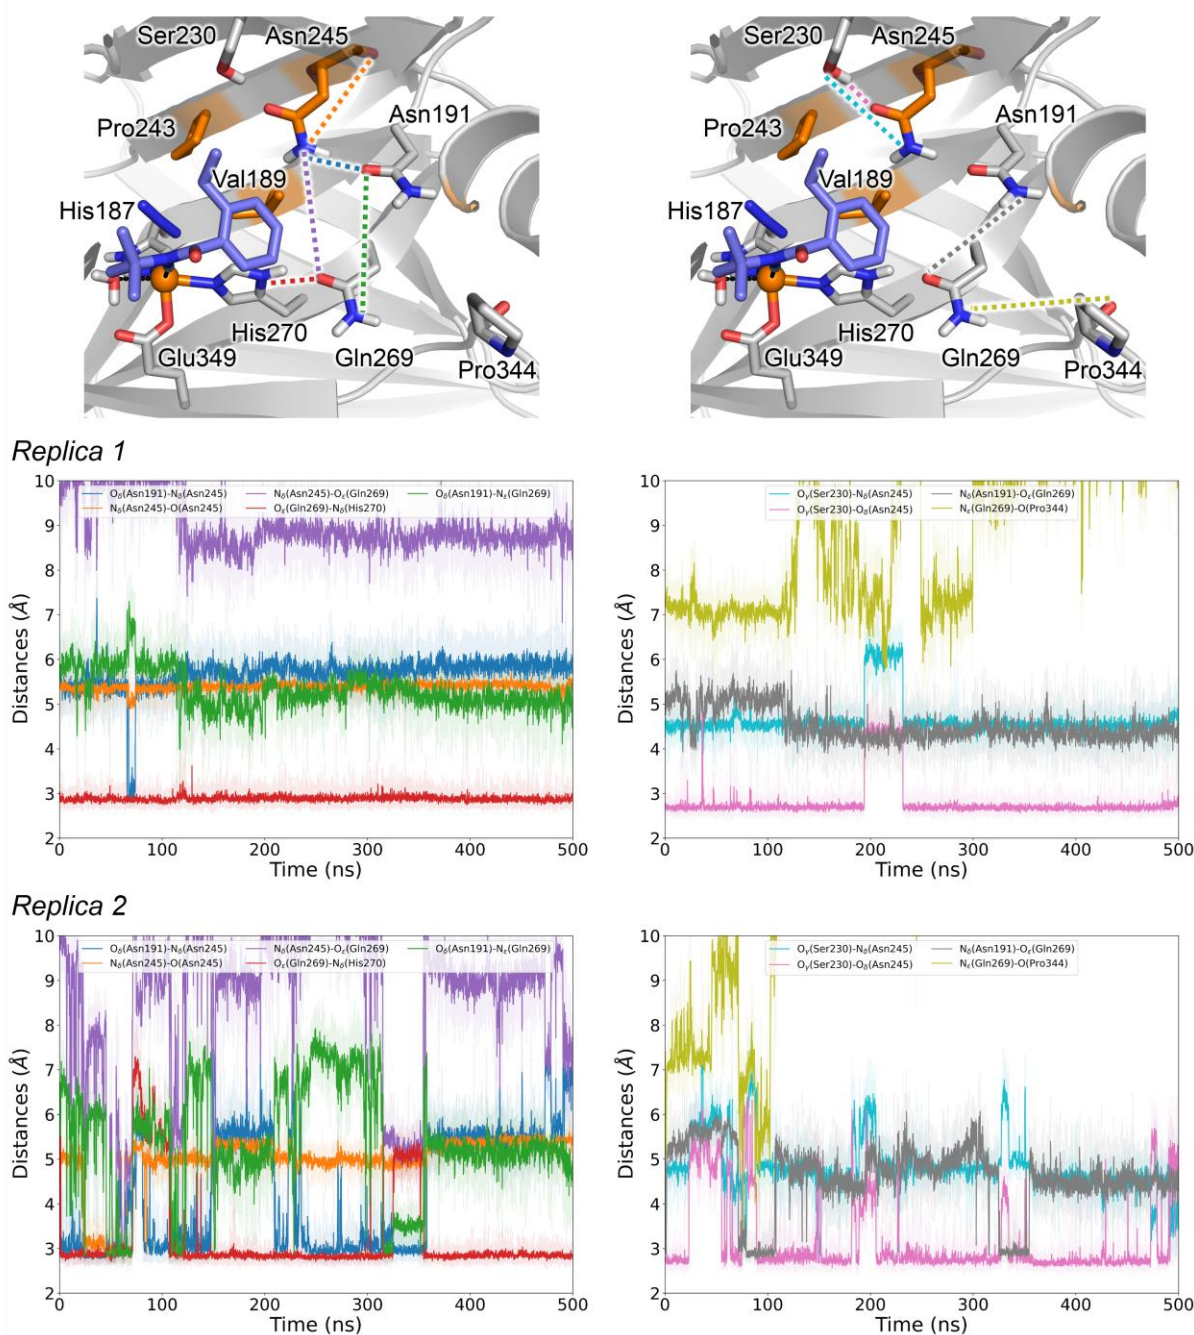

### Replica 3

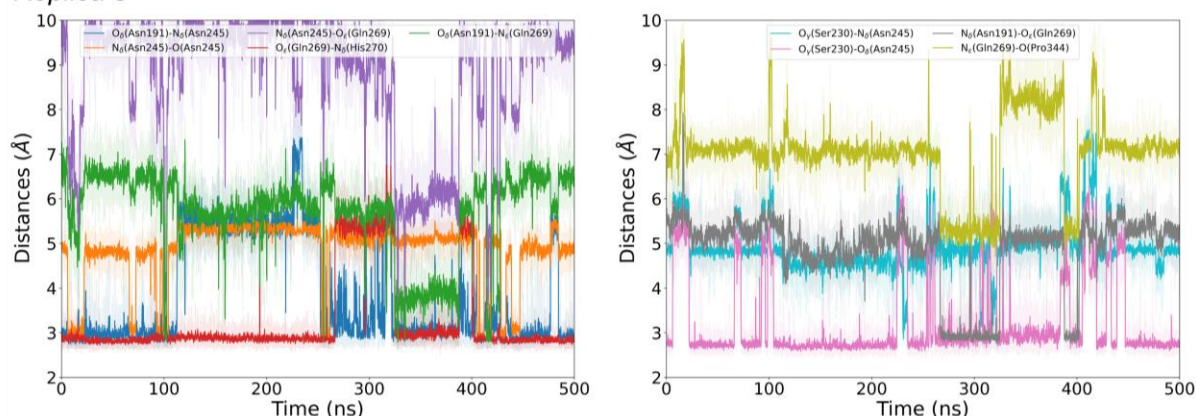

MD simulations of wt *Sav* HppD – Fe-N<sub>3</sub> with **1NF** bound in a near attack conformation of N-F activation describe that Gln269 establishes strong H-bond interactions with the protonated N<sub>δ</sub> of His270 (in red), while Ser230 is also strongly interacting with Asn245 sidechain (in pink). Asn191 can also interact via H-bond with Asn245 (in dark blue).

MD simulations described that the catalytically relevant conformations that substrate **1NF** explores in wt *Sav* HppD (see **Fig. S13**), orient the ethyl group close to the azide and the benzylic C–Hs from the ethyl close to the substrate N atom. This substrate binding mode and conformation is important for an effective and selective HAT and to ensure a rapid and stereoretentive azide recombination. Within this binding mode, the ethyl group of **1NF** is oriented toward the active site region where polar residues N191, S230 and N245 are placed (see **Fig. S13**), which establish the previously described H-bond network.

Consequently, it was hypothesized that a reshaping of this particular region of the active site would be required to control and restrict the accessible conformations of the ethyl group, preorganizing it for a selective HAT and azide recombination steps, in order to enhance the selectivity of the whole reaction. Therefore, positions N191, S230 and N245 were selected and prioritized to be revisited in additional rounds of evolution focused on enhanced enantioselectivity (see **Fig. S15** for computational modelling and discussions on reshaped Az2 active site).

**Figure S15. MD simulations on substrate-bound HppD Az2 enzyme.** 3 independent replicas (replica 1, 2 and 3) of constrained-MD simulations of 500 ns each were carried out to characterize catalytically relevant binding poses of **1NF** substrate bound in a near attack conformation for N–F activation in closed state Az2 active site with the azide coordinated to the iron. Distances and dihedral angles explored along MD trajectories are all described in the included schematic figures. All distances, dihedral angles, and simulation time are given in Å, deg., and ns, respectively. **(A)** Distances explored along MD trajectories between **1NF** N-atom and pro-*R* H ( $H_R$ , red) and pro-*S* H ( $H_S$ , green) atoms, respectively, from **1NF** ethyl group. **(B)** Distances explored along MD trajectories between **1NF** C-atom from the ethyl group (C(Et)) and azide N1 (orange) and N3 (blue) atoms, respectively. **(C)**  $\angle N(\text{Im})\text{-Fe-N1-N2}$  dihedral angle explored along MD trajectories, which describes the relative orientation of the azide in Az2 active site. **(D)** Relative conformations explored by **1NF** substrate along MD trajectories as defined by  $\angle C(\text{tBu})\text{-N-C1(Ph)-C2(Ph)}$  and  $\angle N_\epsilon(\text{His270})\text{-Fe-N-C}(\text{tBu})$  dihedral angles. These two dihedrals describe: i) the relative orientation of **1NF** with respect to the Fe-azide active species ( $\angle N_\epsilon(\text{His270})\text{-Fe-N-C}(\text{tBu})$ ); and ii) the relative orientation of **1NF** ethyl group ( $\angle C(\text{tBu})\text{-N-C1(Ph)-C2(Ph)}$ ). **(E)** Representative selected snapshots that describe the geometries that **1NF** explores when bound in a near attack conformation for N–F activation in Az2 active site, as observed from MD trajectories. Star markers describe the positioning of each selected snapshot on the respective MD trajectory.

**A**

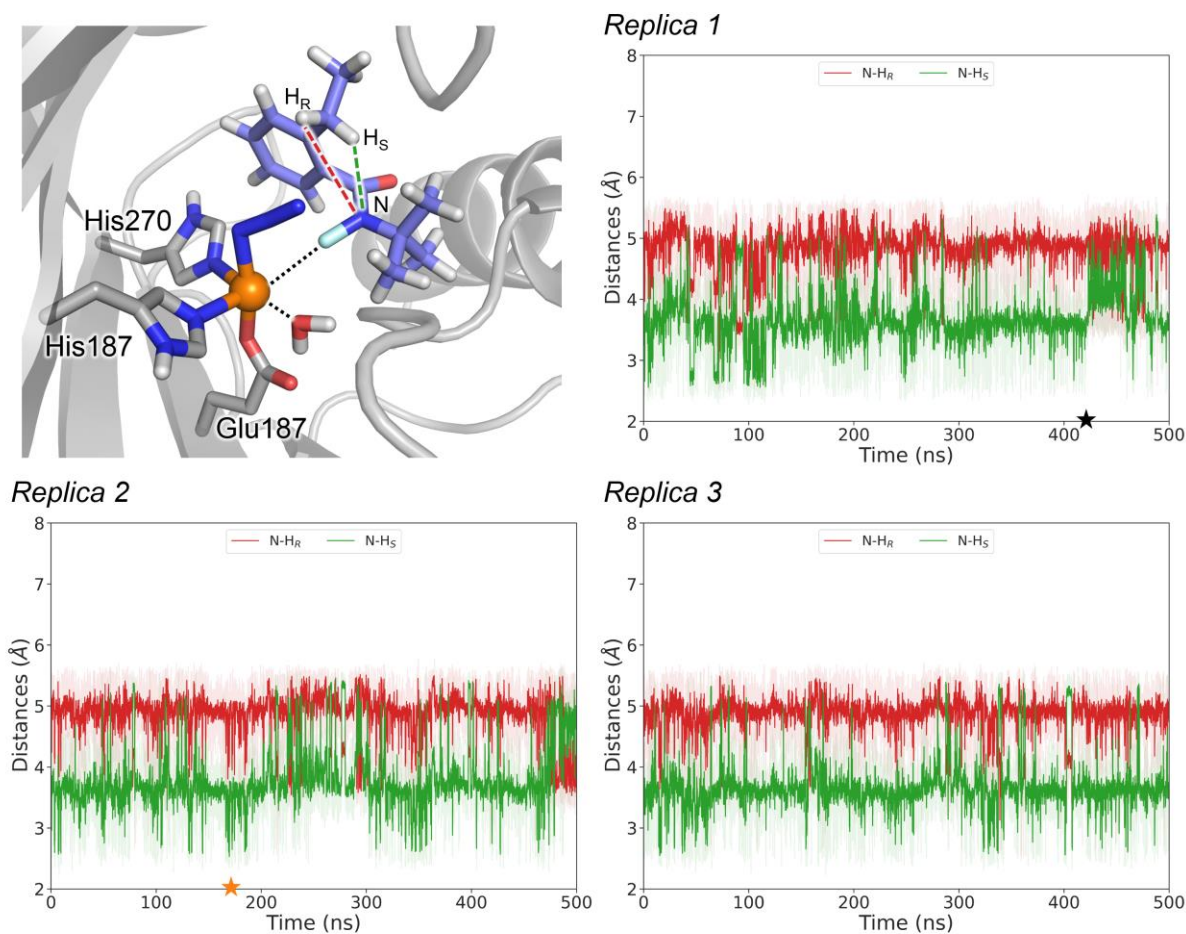

**B**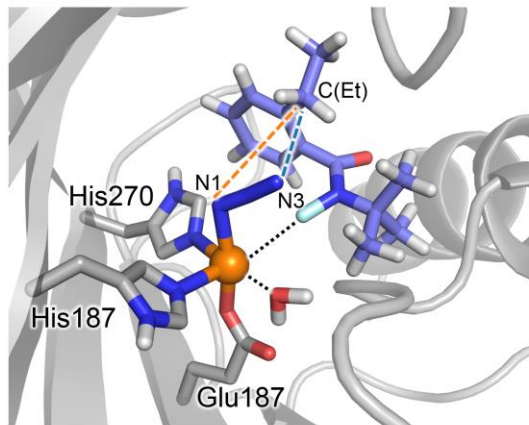*Replica 1*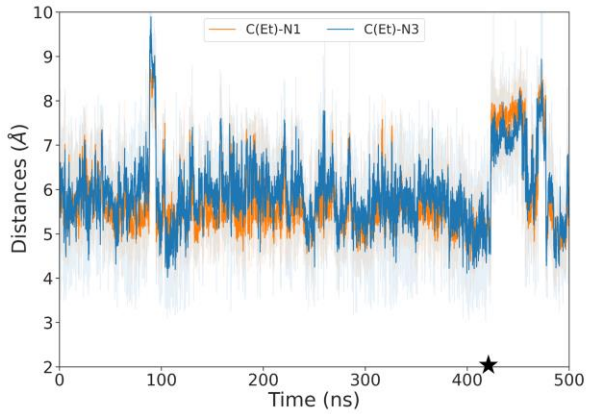*Replica 2*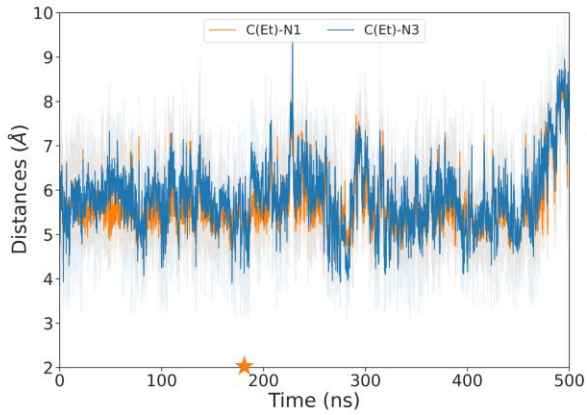*Replica 3*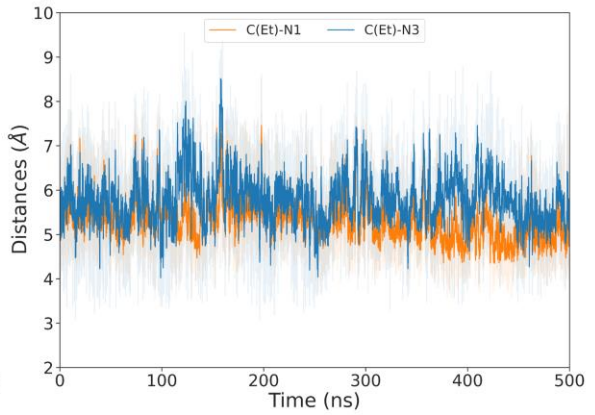**C**

Dihedral  $N_{\epsilon}(\text{His270})\text{-Fe-N1-N2} \approx 140^{\circ}$

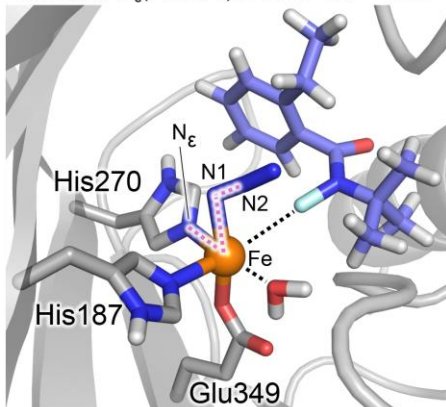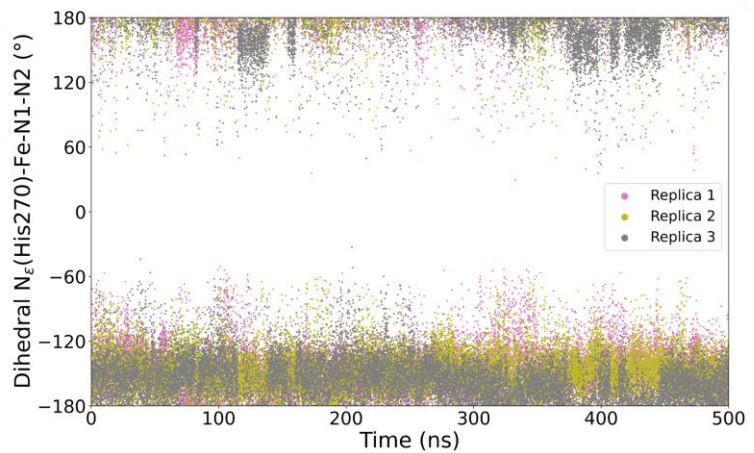



**D**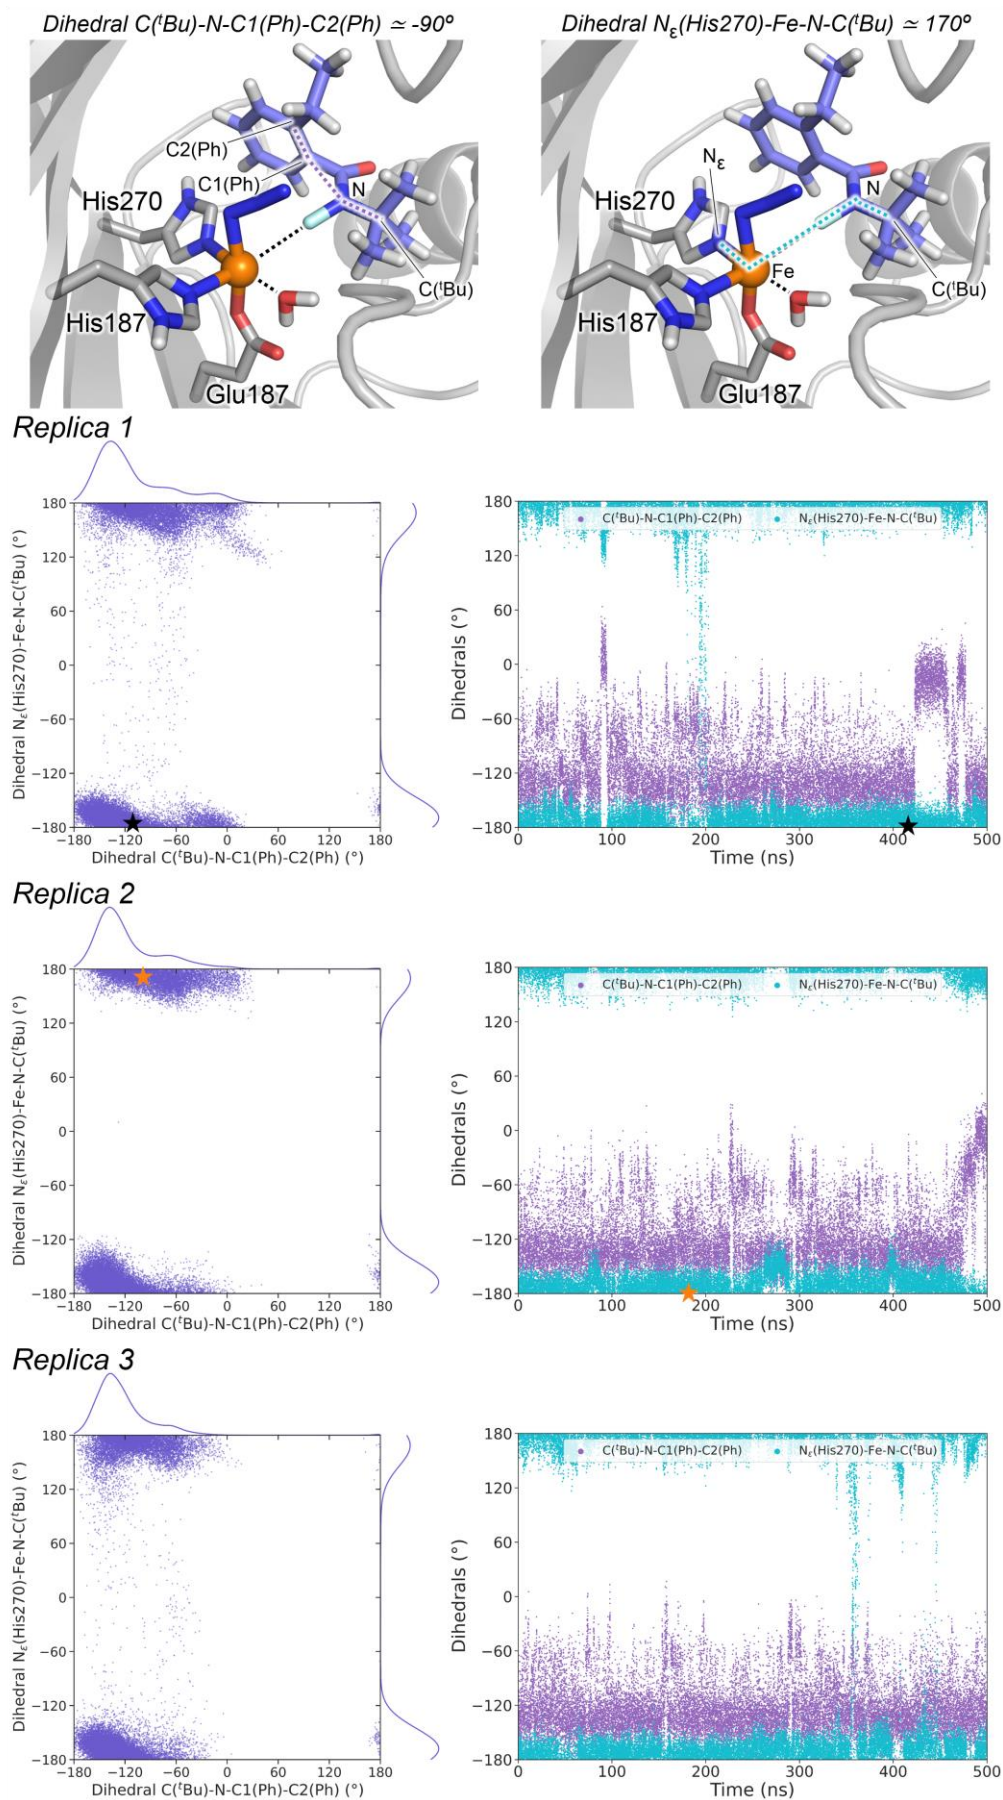

**E**

★  
Replica 1  
(414.2 ns)

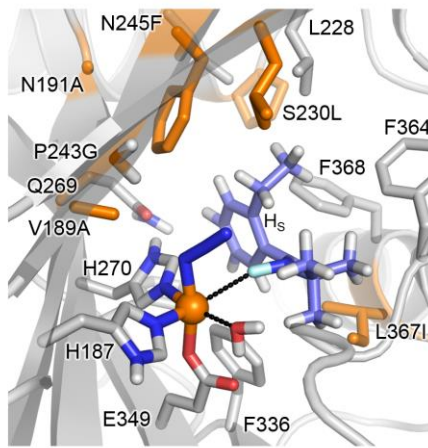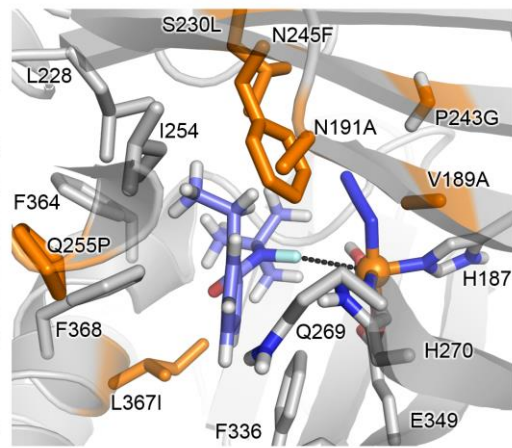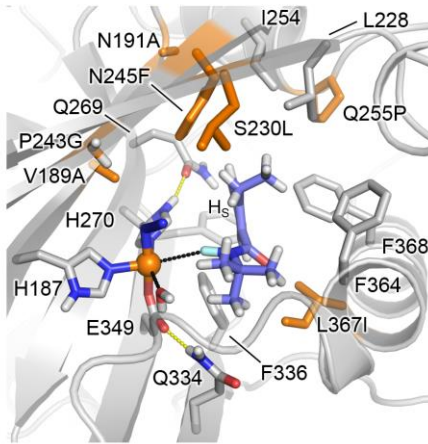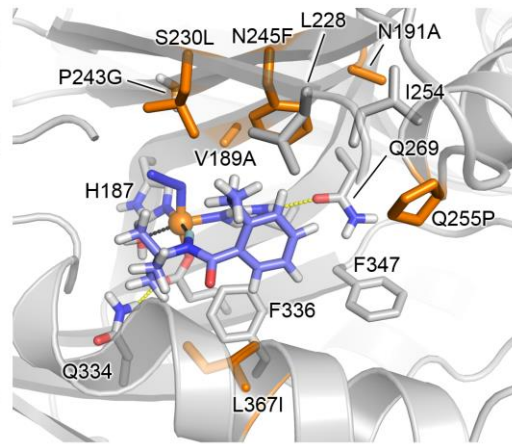

★  
Replica 2  
(187.8 ns)

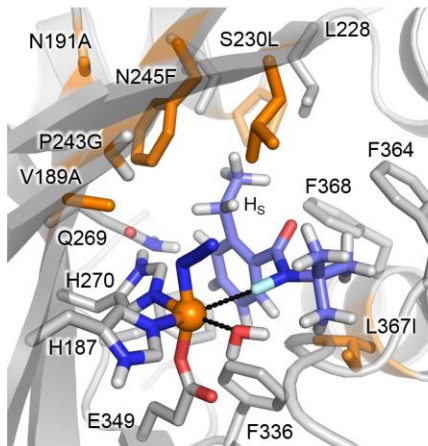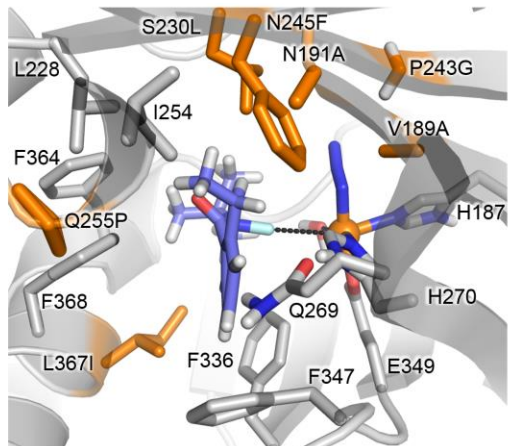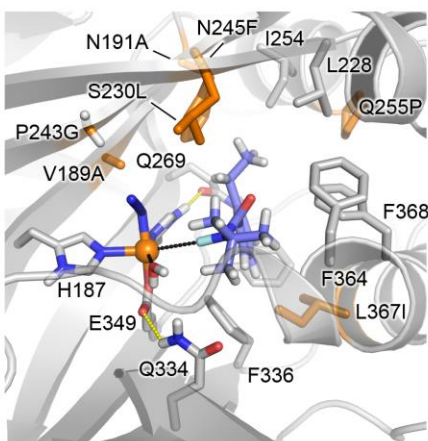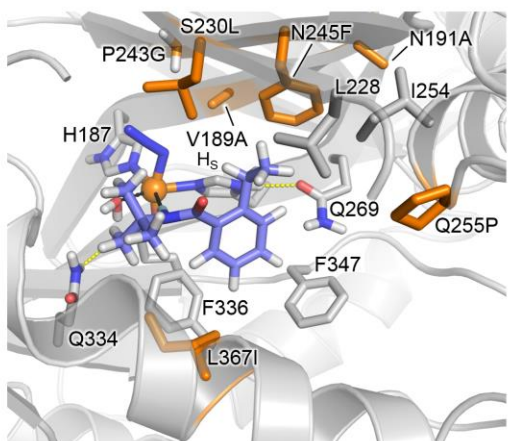

MD simulations show that when **1NF** binds in a catalytically competent pose for N–F activation in HppD Az2 active site, in the protein closed state, it preferentially explores a single orientation relative to the Fe-azide active species (**Fig. S15D** and **E**). Simulations describe that V189A and P243G generated more space to accommodate and stabilize the iron-bound azide in this region of the active site (see also **Fig. S11**). In wt *Sav* HppD, N191, N245 and S230 participate in a hydrogen bonding network with Q269, which is important for the binding and positioning of the native substrate 4-hydroxyphenylpyruvate (HPP). The newly introduced mutations disrupt the original hydrogen bonding network and create a hydrophobic environment to accommodate the *N*-fluoroamide substrate for N–F activation. V189A, N191A and P243G create space for bulkier S230L and N245F side chains that, together with L367I mutation and other active site residues, establish hydrophobic interactions with the substrate and help position the benzyl ethyl group closer to the azide in a restricted and preorganized conformation for the subsequent reaction steps.

The preferential orientation explored by the **1NF** substrate is characterized by  $\angle C(^t\text{Bu})\text{-N-C1(Ph)-C2(Ph)}$  dihedral angle (**Fig. S15D**), which describes how the substrate is oriented in the active site relative to the iron species. Within this orientation, **1NF** adopts a single conformation defined by  $\angle N_\epsilon(\text{His270})\text{-Fe-N-C}(^t\text{Bu})$  angle (**Fig. S15D**), in which the phenyl ethyl group is kept close to the azide (to both N1 and terminal N3, **Fig. S15B**), preorganizing it for the final radical recombination step. The recombination step is preceded by the HAT from the ethyl to the N-radical, which is formed by N–F activation.

This preferred near attack conformation for N–F activation characterized from restrained-MD simulations also describes that the H<sub>5</sub> atom from the ethyl group is precisely positioned for an effective HAT once the N-radical is formed (**Fig. S15A**), thus explaining the origin of enantioselectivity for the azidation catalyzed by Az2 variant. The azide ligand explores a single orientation in Az2 active site in the presence of **1NF** substrate (**Fig. S15C**), which is equivalent to the one characterized by MD simulations in the absence of the substrate (**Fig. S12**).

The active site reshaping due to mutations in Az2 variant as compared to wt *Sav* HppD, has led to a highly complementarity between the active site and the *N*-fluoroamide substrate. This makes the substrate to be stabilized in a single preferential near attack conformation for N–F activation, which preorganizes it for the subsequent and enantioselective HAT and azide recombination steps.

**Figure S16. H-bond network analysis in HppD Az2 – Fe-N<sub>3</sub> – 1NF active site explored by MD simulations.** H-bond interactions analyzed as the distances between the donor and acceptor atoms of active site residues in closed state HppD Az2 – Fe-N<sub>3</sub> with substrate **1NF** bound in a near attack conformation for N-F activation. 3 independent replicas (replica 1, 2 and 3) of MD simulations of 500 ns each are analyzed. Distances explored along MD trajectories are all described in the included schematic figures. All distances and simulation time are given in Å and ns, respectively.

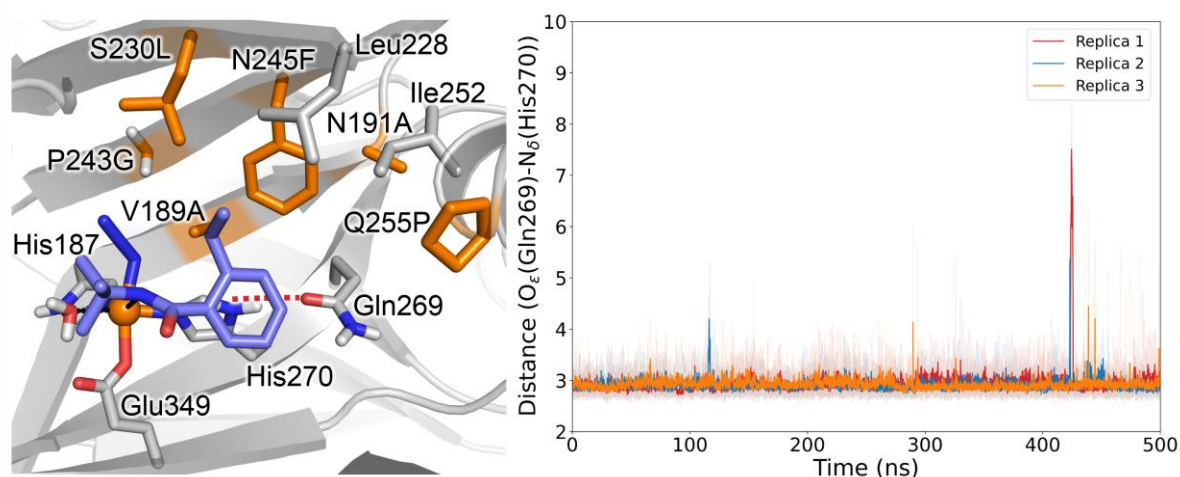

The new hydrophobic mutations introduced in HppD Az2 variant significantly reduce the extent of the H-bond network observed in wt *Sav* HppD (**Figure S14**). Only a single polar interaction between Gln269 and His270 is observed to be highly persistent along the 3 MD replicas, similar to the substrate-free MD simulations in Az2 (**Figure S12**).

The newly introduced mutations, specially S230L, N245F and N191A, largely reduce the polarity of this region of the active site where the azide is placed, making it highly hydrophobic. We hypothesize that this more hydrophobic environment might disfavor the coordination and stabilization of the azide anion, and thus might be contributing to the lower activity exhibited by the Az2 variant.

**Figure S17. Conformational exploration of 1NF substrate using DFT calculations.** DFT calculations were used to study 1NF conformational flexibility. (A) Computed relative electronic energy ( $\Delta E$ ), enthalpy ( $\Delta H$ ), and quasi-harmonic corrected Gibbs energy ( $\Delta G$ ). Energy values were obtained at the (U)B3LYP/Def2TZVP/PCM(diethyl ether) // (U)B3LYP/6-31G(d)/PCM(diethyl ether) level. Energies are referred considering the lowest in energy conformer 1 as zero. (B) Optimized geometries for the lowest in energy conformers 1 and 2, and their interconverting transition state (TS). (C) Relaxed potential energy surface (PES) corresponding to the rotation along the  $\angle F-N-C-O$  dihedral angle. Electronic energies were obtained at the (U)B3LYP/6-31G(d)/PCM(diethyl ether) level. Energies and dihedrals are given in kcal·mol<sup>-1</sup> and degrees (°), respectively.

A

| Structure              | Electronic State          | $\Delta E$ | $\Delta H$ | $\Delta G$ |
|------------------------|---------------------------|------------|------------|------------|
| <b>Conformer 1</b>     | close-shell singlet (CSS) | 0.0        | 0.0        | 0.0        |
| <b>TS rotation 1-2</b> | close-shell singlet (CSS) | 9.6        | 8.9        | 10.2       |
| <b>Conformer 2</b>     | close-shell singlet (CSS) | 4.8        | 4.8        | 4.7        |
| <b>Conformer 3</b>     | close-shell singlet (CSS) | 0.6        | 0.6        | 0.6        |

B

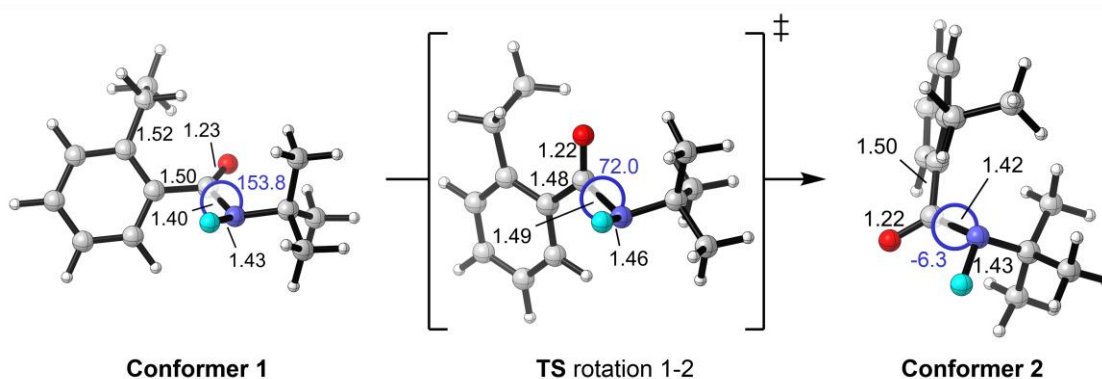

C

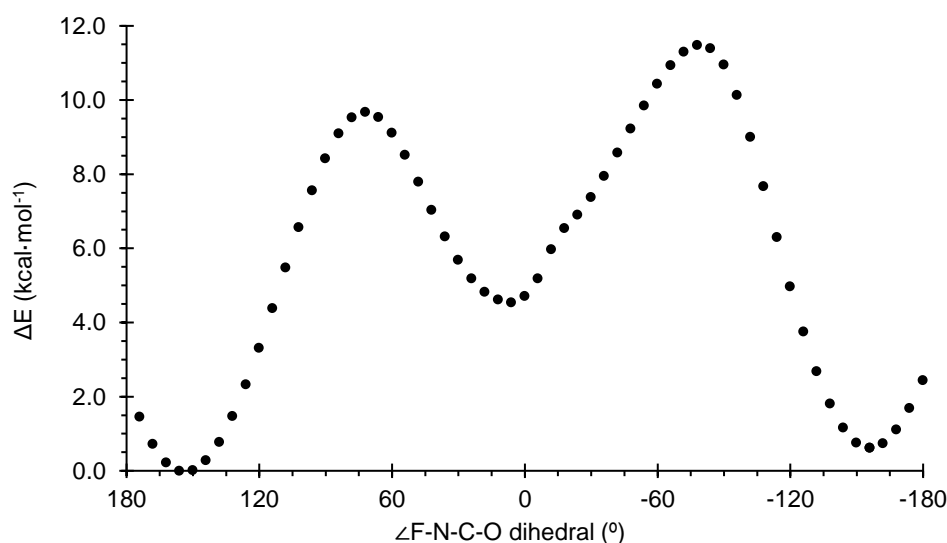

DFT calculations show that different conformers for 1NF substrate are energetically accessible, with isomerization barriers lower than the rate-limiting step of the azidation reaction (Figure S18).

**Figure S18. Enzymatic non-heme iron Azidation mechanism explored by DFT calculations.** (A) Proposed catalytic cycle for azidation reaction catalyzed by non-heme iron enzymes. (B) DFT calculated reaction mechanism for **1NF** azidation using a truncated computational model based on HppD Az2 active site  $[\text{Fe}(\text{N}_3^-)(\text{Ac})(\text{Im})_2(\text{H}_2\text{O})_2]$ . Relative electronic energies ( $\Delta E$ , in parenthesis) and quasi-harmonic corrected Gibbs energies ( $\Delta G$ ) of the lowest in energy electronic state (quintet) are reported. Energy values were obtained at the (U)B3LYP/Def2TZVP/PCM(diethyl ether) // (U)B3LYP/6-31G(d)/PCM(diethyl ether) level. All energies are referred considering the  $[\mathbf{4} + \mathbf{1NF}]$  reactant complex as zero. (C) Preferential near attack conformation for N–F activation explored by **1NF** in HppD Az2 active site as characterized from MD simulations (**Figure S15**, representative snapshot obtained from replica 1, at 414.2 ns). This structure was used as starting point to build the computational truncated model for the study of the azidation mechanism. (D) Optimized geometries for the stationary points (reactants and products, intermediates, and transition states (TSs)) reported in **A–B**. All energy values are given in  $\text{kcal}\cdot\text{mol}^{-1}$ . Mulliken spin densities of key atoms are reported ( $\rho$ , a.u.). Distances and angles are given in Angstrom ( $\text{\AA}$ ) and degrees ( $^\circ$ ), respectively.

**A**

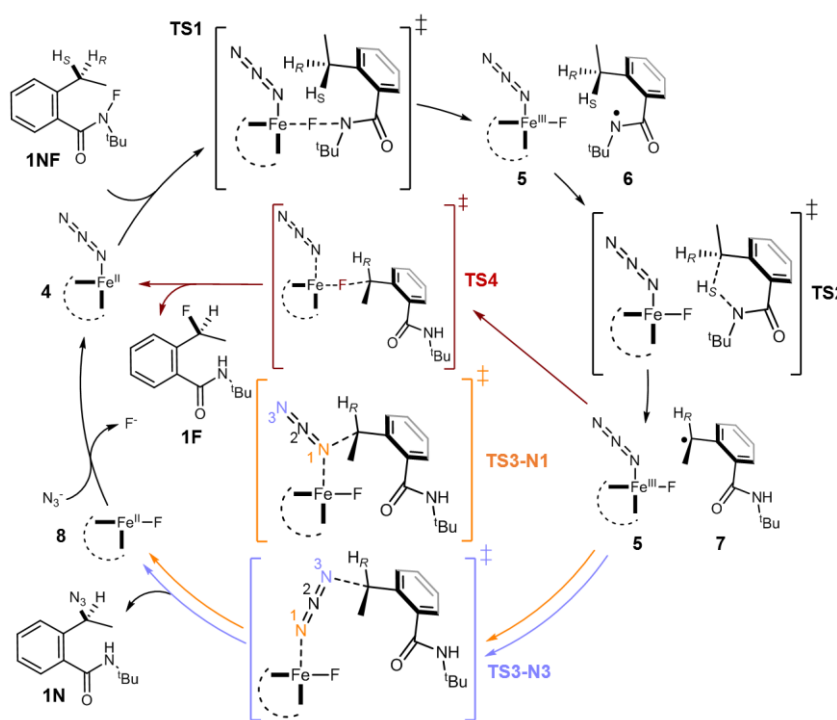

**B**

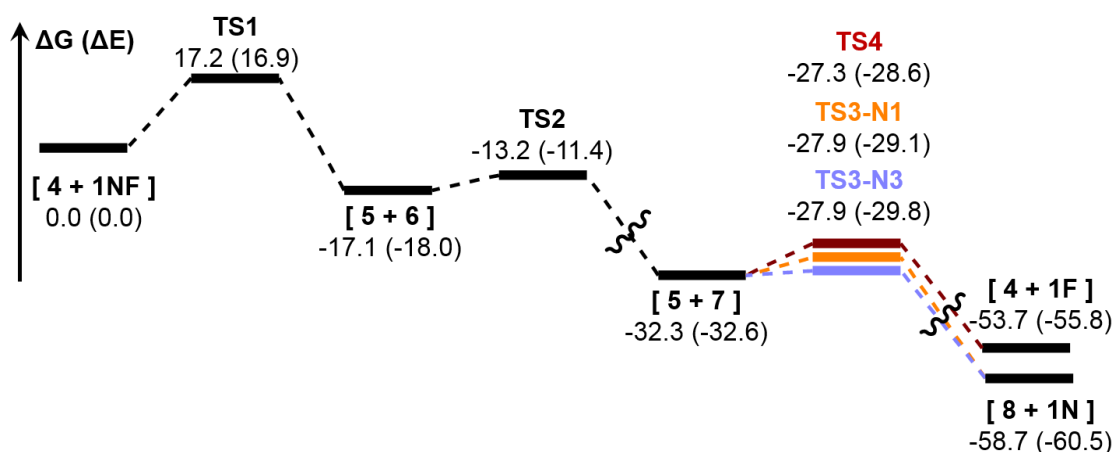

**C**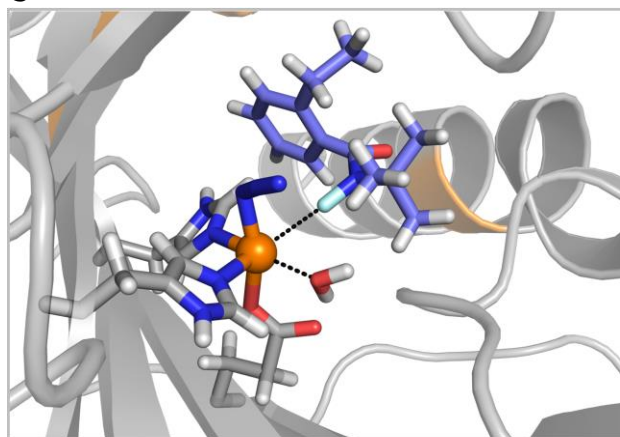HppD Az2 - Fe-N<sub>3</sub> - 1NF, MD replica 1, at 414.2 ns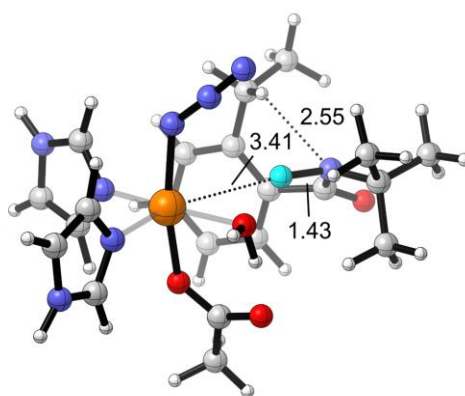

DFT optimized [ 4 + 1NF ] reactant complex

**D**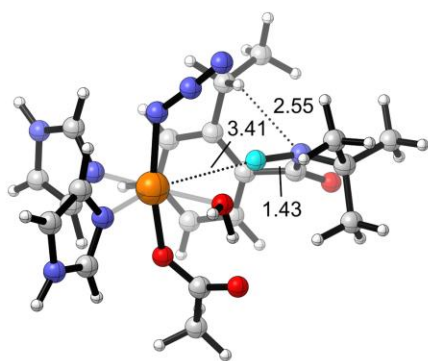

(view 1)

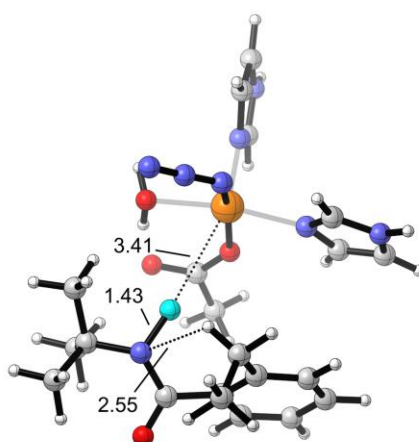

(view 2)

**[ 4 + 1NF ]**  
 (React. Complex, Q)  
 $\Delta G = 0.0$  ( $\Delta E = 0.0$ )

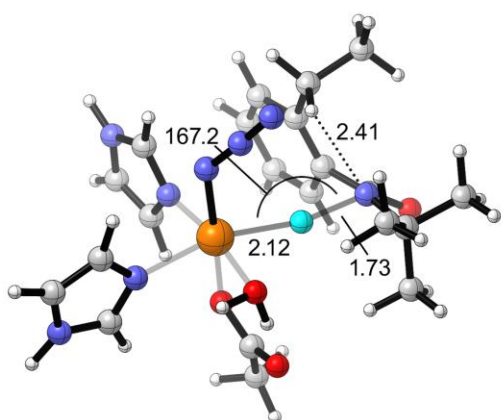

(view 1)

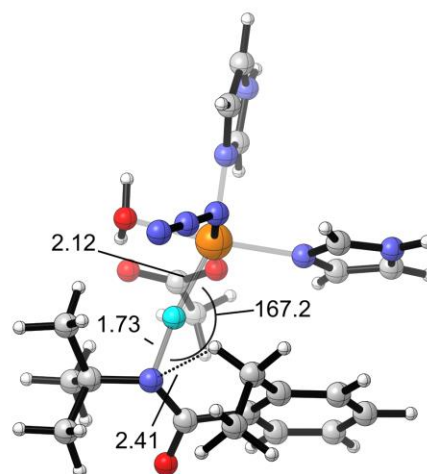

(view 2)

**TS1 (Q)**  
 $\Delta G^\ddagger = 17.2$  ( $\Delta E^\ddagger = 16.9$ )

$\rho(\text{F}) = 0.03$   
 $\rho(\text{N}) = -0.28$   
 $\rho(\text{N1}) = 0.02$   
 $\rho(\text{N3}) = 0.13$

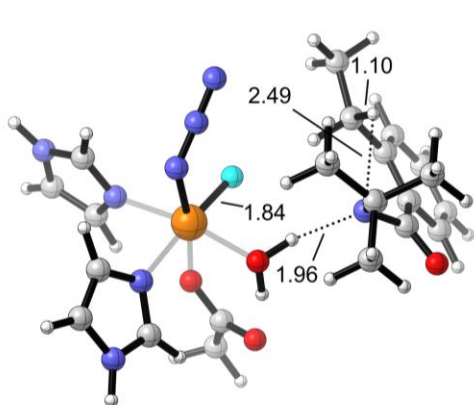

(view 1)

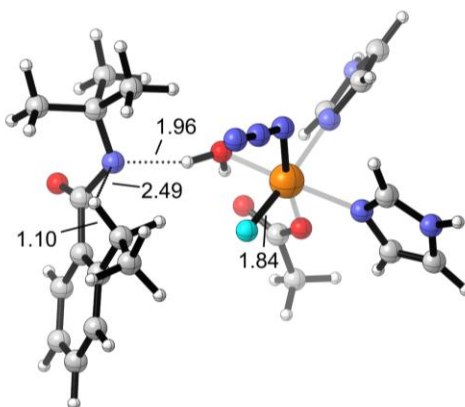

(view 2)

$\rho(\text{F}) = 0.20$   
 $\rho(\text{C}) = 0.00$   
 $\rho(\text{H}) = 0.00$   
 $\rho(\text{N}) = -0.83$   
 $\rho(\text{N1}) = 0.08$   
 $\rho(\text{N3}) = 0.19$

**[ 5 + 6 ]**

(Int. Complex, Q)

$\Delta G_{\text{R}} = -17.1$  ( $\Delta E_{\text{R}} = -18.0$ )

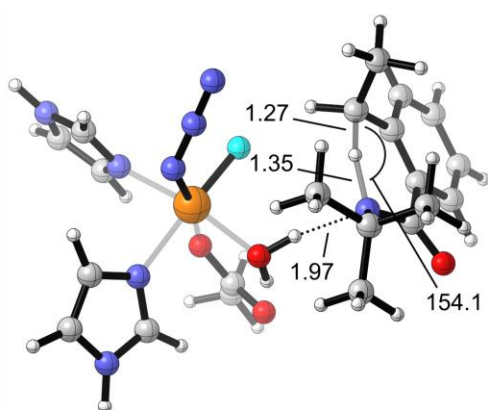

(view 1)

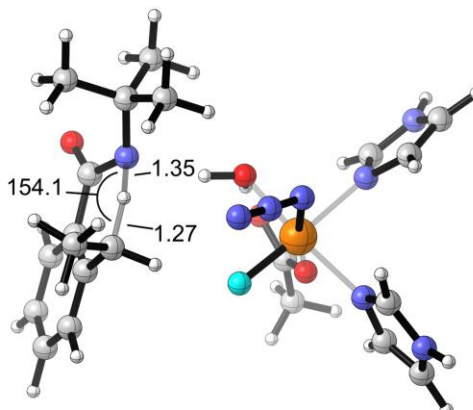

(view 2)

$\rho(\text{C}) = -0.43$   
 $\rho(\text{H}) = 0.02$   
 $\rho(\text{N}) = -0.45$

**TS2 (Q)**

$\Delta G^{\ddagger} = 4.0$  ( $\Delta E^{\ddagger} = 6.6$ )

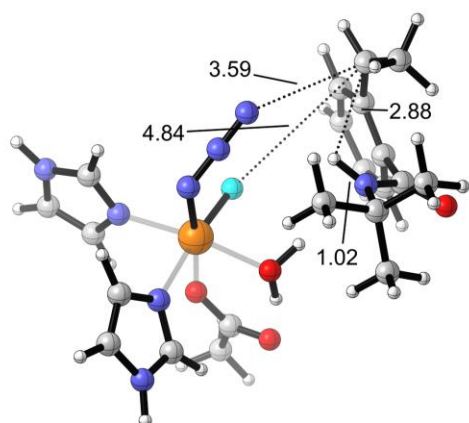

(view 1)

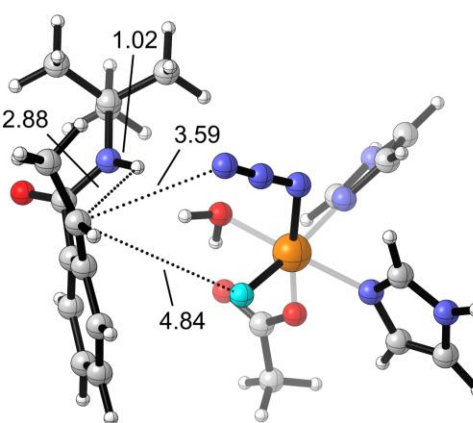

(view 2)

$\rho(\text{F}) = 0.21$   
 $\rho(\text{C}) = -0.71$   
 $\rho(\text{H}) = 0.00$   
 $\rho(\text{N}) = -0.01$   
 $\rho(\text{N1}) = 0.08$   
 $\rho(\text{N3}) = 0.19$

**[ 5 + 7 ]**

(Int. Complex, Q)

$\Delta G_{\text{R}} = -15.1$  ( $\Delta E_{\text{R}} = -14.6$ )



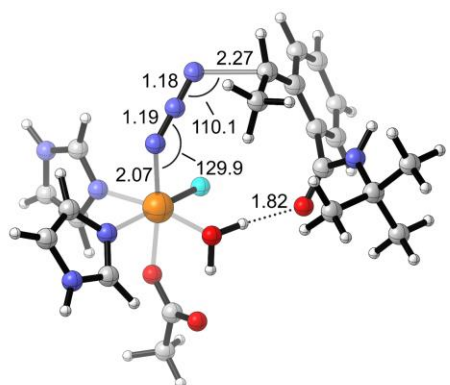

(view 1)

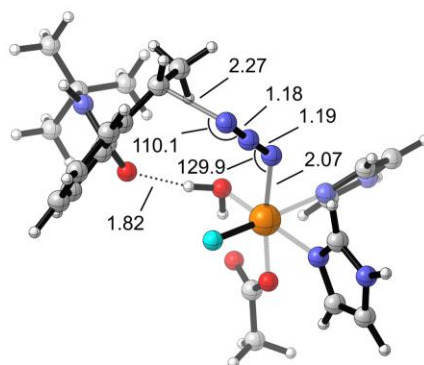

(view 2)

$$\begin{aligned} \rho(\text{C}) &= -0.41 \\ \rho(\text{N1}) &= 0.05 \\ \rho(\text{N3}) &= 0.19 \end{aligned}$$

**TS3-N3 (Q)**  
 $\Delta G^\ddagger = 4.3$  ( $\Delta E^\ddagger = 2.8$ )

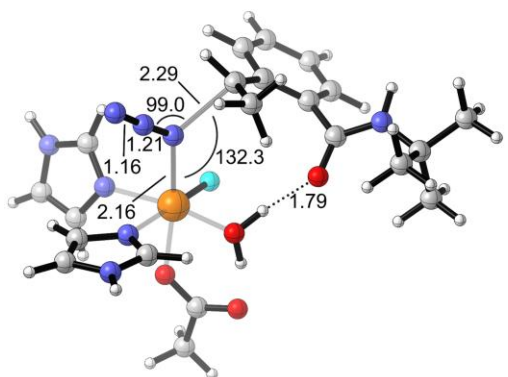

(view 1)

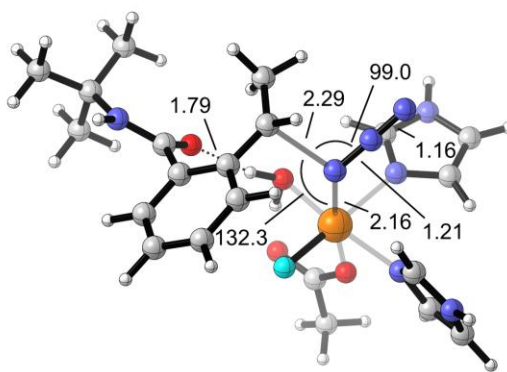

(view 2)

$$\begin{aligned} \rho(\text{C}) &= -0.38 \\ \rho(\text{N1}) &= 0.06 \\ \rho(\text{N3}) &= 0.11 \end{aligned}$$

**TS3-N1 (Q)**  
 $\Delta G^\ddagger = 4.4$  ( $\Delta E^\ddagger = 3.5$ )

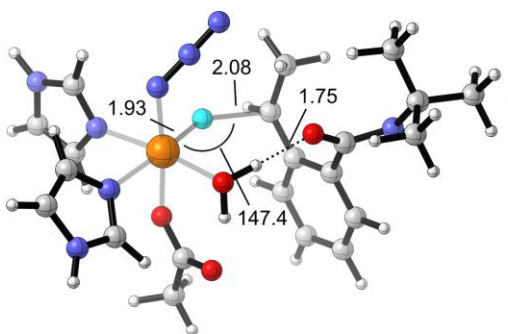

(view 1)

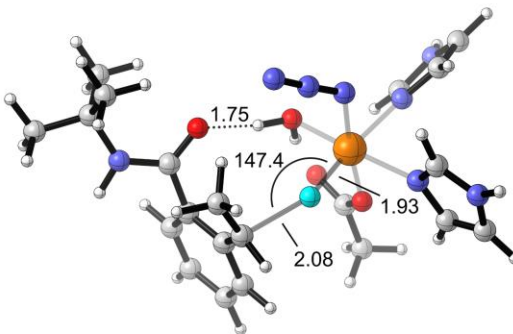

(view 2)

$$\begin{aligned} \rho(\text{F}) &= 0.12 \\ \rho(\text{C}) &= -0.36 \end{aligned}$$

**TS4 (Q)**  
 $\Delta G^\ddagger = 5.0$  ( $\Delta E^\ddagger = 4.0$ )

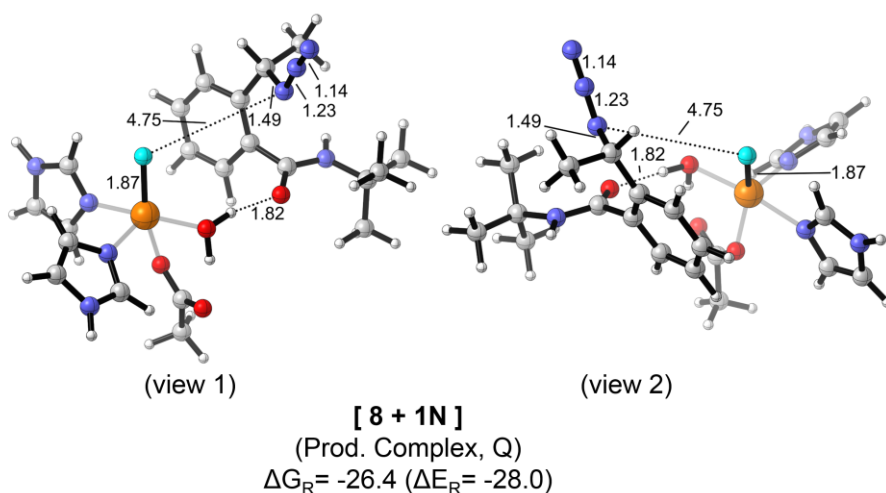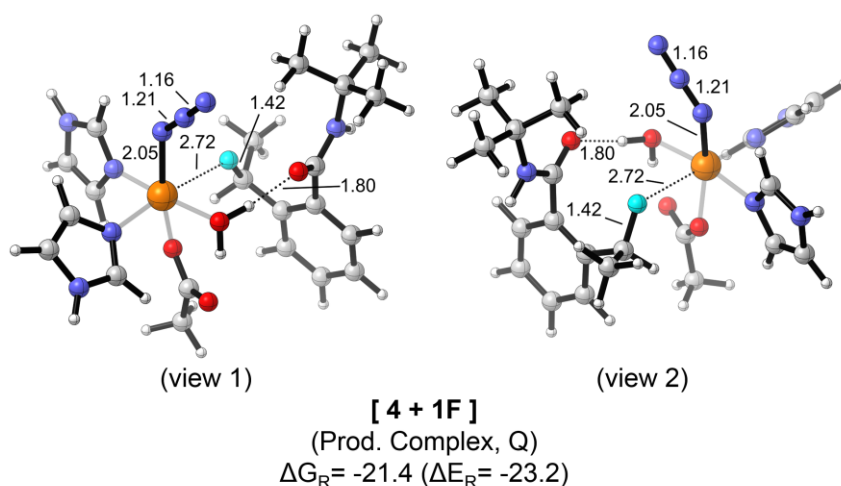

The initial truncated model structure used for the DFT modelling was generated from a representative MD snapshot that describes the preferred binding mode of **1NF** in a near attack conformation for N–F activation in HppD Az2 variant (**Figure S15**). Quintet and triplet electronic states were considered for the entire reaction pathway (**Table S7**), being the quintet electronic state the energetically more favorable pathway. The N–F activation by the ferric azide corresponds to the rate-limiting step of the reaction (**TS1**,  $\Delta G^\ddagger = 17.2$  kcal·mol<sup>-1</sup>). After fluorine abstraction, the iron is oxidized to its ferric form and a *N*-radical intermediate is formed (**[5 + 6]** intermediate complex). Due to substrate preorganization in Az2 active site (**Figure S15**), pro-*S* (H<sub>S</sub>) benzylic hydrogen can rapidly be abstracted through a low in energy 1,5-HAT transition state (**TS2**,  $\Delta G^\ddagger = 4.0$  kcal·mol<sup>-1</sup>), forming a much more stable benzylic C-radical intermediate (**[5 + 7]** intermediate complex,  $\Delta\Delta G = 15.1$  kcal·mol<sup>-1</sup> more stable than the *N*-centered radical). The low barrier calculated for 1,5-HAT, and the formation of a thermodynamically much more stable benzylic C-radical intermediate, indicate that this stereo-determining step of the reaction mechanism is controlled by the geometric preorganization that the enzyme active site is imposing to the substrate. Once formed, the resulting C-radical can rapidly recombine with the iron-bound azide in a stereo-retentive manner through nitrogen N1 (N–Fe, **TS3-N1**,  $\Delta G^\ddagger = 4.4$  kcal·mol<sup>-1</sup>) or terminal N3 (**TS3-N3**,  $\Delta G^\ddagger = 4.3$  kcal·mol<sup>-1</sup>). The orientation of the azide in Az2 active site with respect to **1NF** substrate (**Figure S15-C**), and the isoenergetic transition state barriers calculated, indicate that both recombination pathways are possible. The possible fluorine transfer to the benzylic C-radical has also been explored. Model DFT calculations describe that the fluorine recombination has a low activation barrier (**TS4**,  $\Delta G^\ddagger = 5.0$  kcal·mol<sup>-1</sup>), indicating that steric constraints imposed by Az2 active site prevent the radical intermediate **7** to repositioning for effective fluorine recombination.

**Table S7. Relative energies of all the stationary points characterized for the azidation mechanism.** DFT computed relative energies for all the stationary points described in **Figure S18** in their triplet (T) and quintet (Q) electronic states in terms of electronic energy ( $\Delta E$ ), enthalpy ( $\Delta H$ ), and quasi-harmonic corrected Gibbs energy ( $\Delta G$ ). Energy values were obtained at the (U)B3LYP/Def2TZVP/PCM(diethyl ether)//(U)B3LYP/6-31G(d)/PCM(diethyl ether) level. Energies are referred considering the lowest in energy [**4 + 1NF**] (reactant complex) in the quintet electronic state as zero. All energies are given in kcal·mol<sup>-1</sup>.

| <b>Structure</b>                       | <b>Electronic State</b> | <b><math>\Delta E</math></b> | <b><math>\Delta H</math></b> | <b><math>\Delta G</math></b> |
|----------------------------------------|-------------------------|------------------------------|------------------------------|------------------------------|
| <b>4 + 1NF</b><br>(Separated React.)   | triplet (T)             | 15.5                         | 14.5                         | -0.5                         |
|                                        | quintet (Q)             | -3.8                         | -5.0                         | -21.6                        |
| <b>[ 4 + 1NF ]</b><br>(React. Complex) | triplet (T)             | 17.5                         | 17.8                         | 19.1                         |
|                                        | quintet (Q)             | 0.0                          | 0.0                          | 0.0                          |
| <b>TS1</b>                             | triplet (T)             | 31.5                         | 30.5                         | 34.6                         |
|                                        | quintet (Q)             | 16.9                         | 15.4                         | 17.2                         |
| <b>[ 5 + 6 ]</b><br>(Int. Complex)     | triplet (T)             | 4.0                          | 3.7                          | 6.4                          |
|                                        | quintet (Q)             | -18.0                        | -18.6                        | -17.1                        |
| <b>TS2</b>                             | triplet (T)             | 0.9                          | -3.2                         | 0.0                          |
|                                        | quintet (Q)             | -11.4                        | -15.8                        | -13.2                        |
| <b>[ 5 + 7 ]</b><br>(Int. Complex)     | triplet (T)             | -16.8                        | -17.4                        | -14.6                        |
|                                        | quintet (Q)             | -32.6                        | -33.4                        | -32.3                        |
| <b>TS3-N3</b>                          | triplet (T)             | -11.1                        | -12.0                        | -8.5                         |
|                                        | quintet (Q)             | -29.8                        | -31.0                        | -27.9                        |
| <b>TS3-N1</b>                          | triplet (T)             | -6.9                         | -7.8                         | -3.8                         |
|                                        | quintet (Q)             | -29.1                        | -30.1                        | -27.9                        |
| <b>TS4</b>                             | triplet (T)             | -11.9                        | -12.4                        | -8.1                         |
|                                        | quintet (Q)             | -28.6                        | -29.6                        | -27.3                        |
| <b>[ 8 + 1N ]</b><br>(Prod. Complex)   | triplet (T)             | -40.4                        | -39.0                        | -36.8                        |
|                                        | quintet (Q)             | -60.5                        | -59.5                        | -58.7                        |
| <b>[ 4 + 1F ]</b><br>(Prod. Complex)   | triplet (T)             | -38.8                        | -37.3                        | -34.8                        |
|                                        | quintet (Q)             | -55.8                        | -54.6                        | -53.7                        |

**Figure S19. DFT exploration of N–F activation step. A)** Thermodynamic cycle explored for alternative N–F activation via a first outer sphere electron transfer. **B)** Relative energies for all the species involved in terms of electronic energy ( $\Delta E$ ), enthalpy ( $\Delta H$ ), and quasi-harmonic corrected Gibbs energy ( $\Delta G$ ). Energy values were obtained at the (U)B3LYP/Def2TZVP/PCM(diethyl ether) // (U)B3LYP/6-31G(d)/PCM(diethyl ether) level. Energies are referred considering the lowest in energy [**4** + **1NF**] (independent reactants) in the quintet electronic state as zero. The electronic state reported in each case refers only to the spin state of the Fe-containing species. **C)** Optimized geometries for the studied species, including key geometric parameters and the charge and spin density of key atoms (charge / spin density, in a.u.). All energies are given in kcal·mol<sup>-1</sup>. Distances are given in Angstrom (Å).

**A**

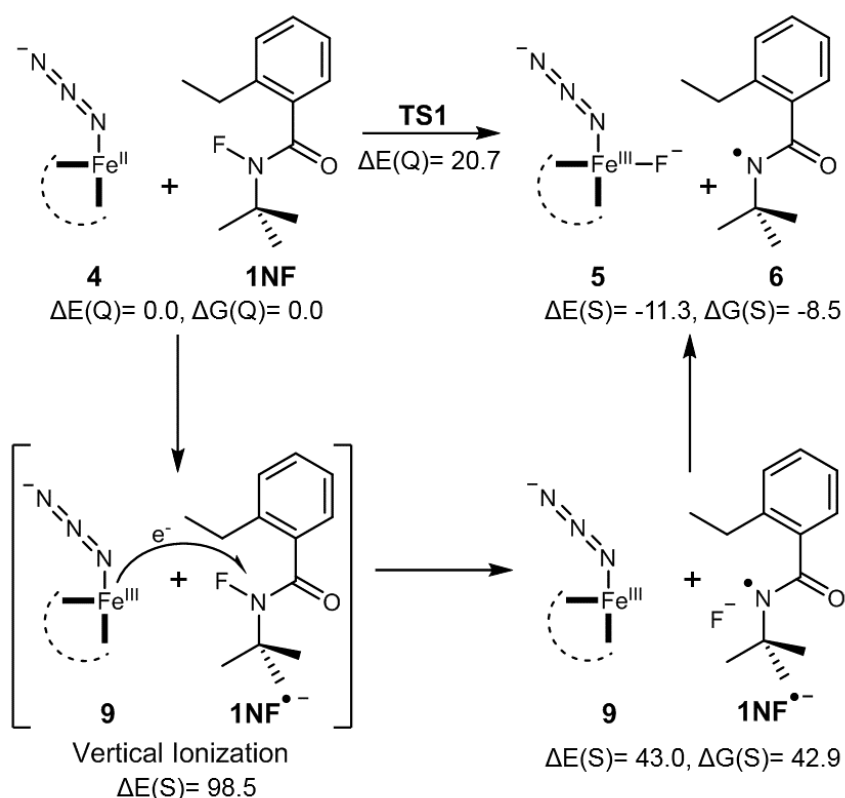

**B**

| Structure                                                                     | Electronic State | $\Delta E$ | $\Delta H$ | $\Delta G$ |
|-------------------------------------------------------------------------------|------------------|------------|------------|------------|
| <b>4</b> + <b>1NF</b><br>(Separated React.)                                   | triplet (T)      | 19.3       | 19.5       | 21.1       |
|                                                                               | quintet (Q)      | 0.0        | 0.0        | 0.0        |
| <b>TS1</b>                                                                    | triplet (T)      | 35.3       | 35.5       | 56.2       |
|                                                                               | quintet (Q)      | 20.7       | 20.3       | 38.7       |
| <b>9</b> + <b>1NF<sup>•-</sup></b><br>(Separated Int.)<br>Vertical Ionization | doublet (D)      | 115.4      | -          | -          |
|                                                                               | quartet (Qu)     | 115.8      | -          | -          |
|                                                                               | sextet (S)       | 98.5       | -          | -          |
| <b>9</b> + <b>1NF<sup>•-</sup></b><br>(Separated Int.)                        | doublet (D)      | 61.4       | 60.7       | 65.0       |
|                                                                               | quartet (Qu)     | 52.1       | 50.4       | 52.7       |
|                                                                               | sextet (S)       | 43.0       | 41.9       | 42.9       |
| <b>5</b> + <b>6</b><br>(Separated Int.)                                       | doublet (D)      | 0.0        | -0.3       | 7.1        |
|                                                                               | quartet (Qu)     | 0.9        | 0.0        | 4.6        |
|                                                                               | sextet (S)       | -11.3      | -12.5      | -8.5       |

C

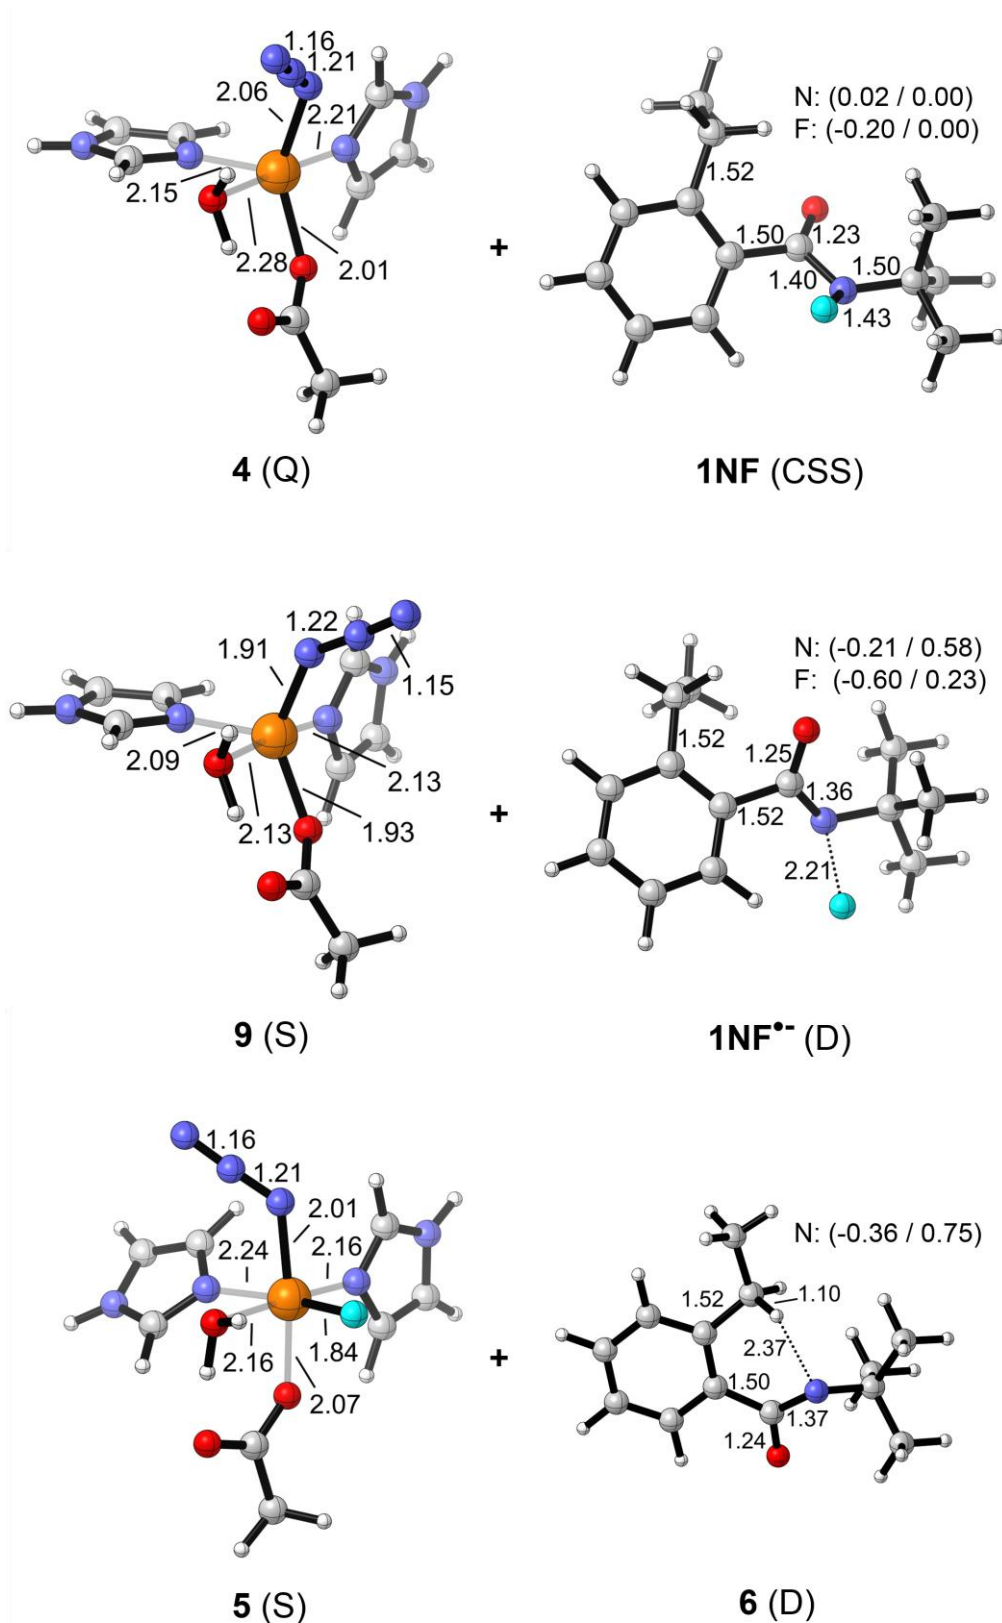

DFT calculations indicate that the fluorine abstraction process is expected to occur through a concerted homolytic cleavage of the N–F bond (**TS1**), as described in **Figure S18**. The alternative N–F bond activation through a first electron transfer (ET) from the ferrous metal center to the *N*-fluoroamide substrate is energetically highly unfavorable.

**Figure S20. Frontier Molecular Orbital (FMO) analysis of the radical recombination step.** Frontier Molecular Orbitals (FMO),  $\beta$ -HOMO and  $\beta$ -LUMO orbitals, at the transition states (TSs) corresponding to the azide recombination from the terminal N3-atom (**TS3-N3**) and the Fe-bound N-atom (**TS3-N1**), and for the fluorine recombination (**TS4**).

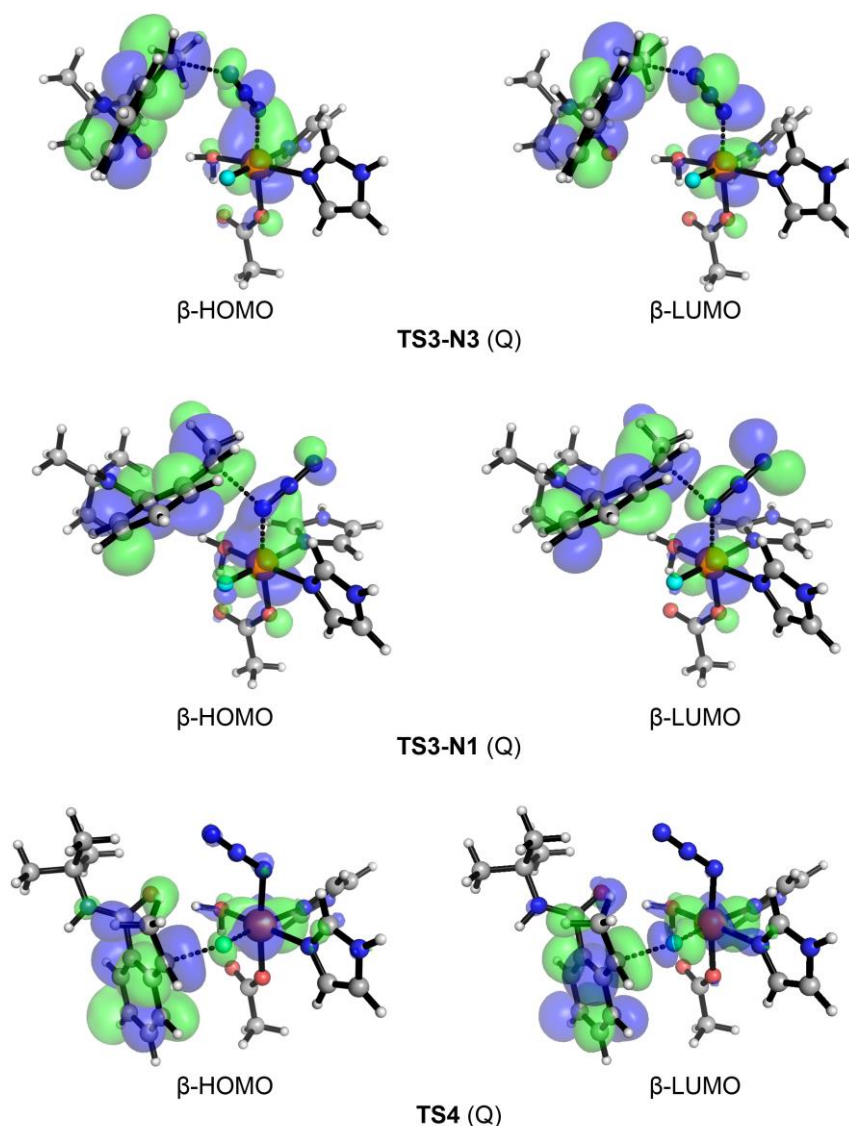

The FMO orbitals ( $\beta$ -HOMO and  $\beta$ -LUMO) from **TS3-N3** (Q) and **TS3-N1** (Q) optimized geometries show a clear contribution on the electron-donor  $\beta$ -HOMOs of the substrate C-radical p-orbital, and a  $\beta$ - $d\pi$  (Fe-N<sub>3</sub>) character. On the other hand, the electron-acceptor  $\beta$ -LUMOs show a strong  $\beta$ - $d\pi^*$  contribution on the Fe-N3 bond that is being cleaved. An equivalent scenario is observed for fluorine recombination and **TS4** (Q).

These observations are consistent with previous works (36, 37) describing that the radical recombination step is initiated by a  $\beta$ -electron transfer from the C-radical to the iron center through a superexchange mediating anionic ligand, which after the TS is followed by the anion recombination (N<sub>3</sub> in this case). This mechanism implies the electron transfer from  $\beta$ -HOMO to  $\beta$ -LUMO right after the TS.

**Table S8.** Energies and thermochemistry parameters (at T = 298.15 K and P = 1 atm) of all computationally characterized stationary points reported in **Figures S8, S17, and S19**. Electronic energies (E), enthalpy (H), free energy (G), quasi harmonic corrected free energy (qh-G), and electronic energies from high level single point calculations (E (SP)) are given in a.u. Imaginary frequencies are given in cm<sup>-1</sup>.

| Structure                                     | Electronic State          | E            | H            | G            | G-qh         | E (SP)       | Imag. Freq. |
|-----------------------------------------------|---------------------------|--------------|--------------|--------------|--------------|--------------|-------------|
| <b>Coordination mode 1</b>                    | triplet (T)               | -1122.026010 | -1121.737867 | -1121.821620 | -1121.821043 | -2262.300598 | -           |
|                                               | quintet (Q)               | -1122.055944 | -1121.769148 | -1121.857088 | -1121.856131 | -2262.327085 | -           |
| <b>Coordination mode 2</b>                    | triplet (T)               | -1122.022898 | -1121.735772 | -1121.821130 | -1121.821130 | -2262.301045 | -           |
|                                               | quintet (Q)               | -1122.054018 | -1121.767010 | -1121.852429 | -1121.852163 | -2262.323029 | -           |
| <b>1NF</b> (conformer 1)                      | close-shell singlet (CSS) | -735.994954  | -735.689196  | -735.750719  | -735.757740  | -736.279217  | -           |
| <b>TS</b> rotation 1-2                        | close-shell singlet (CSS) | -735.979492  | -735.674972  | -735.734416  | -735.741402  | -736.263866  | 58.0i       |
| <b>1NF</b> (conformer 2)                      | close-shell singlet (CSS) | -735.984940  | -735.679249  | -735.741165  | -735.747982  | -736.271531  | -           |
| <b>1NF</b> (conformer 3)                      | close-shell singlet (CSS) | -735.993922  | -735.688108  | -735.749723  | -735.756719  | -736.278276  | -           |
| <b>1NF<sup>••</sup></b> (Vertical Ionization) | doublet (D)               | -736.022072  | -            | -            | -            | -736.323991  | -           |
| <b>1NF<sup>••</sup></b>                       | doublet (D)               | -736.091347  | -733.057767  | -733.681827  | -733.752937  | -736.397493  | -           |
| <b>4</b>                                      | triplet (T)               | -1045.597718 | -1045.338074 | -1045.416433 | -1045.415738 | -2185.827167 | -           |
|                                               | quintet (Q)               | -1045.630385 | -1045.371148 | -1045.452334 | -1045.451339 | -2185.857862 | -           |
| <b>5</b>                                      | doublet (D)               | -1145.461681 | -1145.197343 | -1145.274016 | -1145.273493 | -2285.735355 | -           |
|                                               | quartet (Qu)              | -1145.461466 | -1145.198074 | -1145.279280 | -1145.278771 | -2285.733871 | -           |
|                                               | sextet (S)                | -1145.482406 | -1145.219431 | -1145.301551 | -1145.300993 | -2285.753410 | -           |
| <b>6</b>                                      | doublet (D)               | -636.165573  | -635.865403  | -635.926212  | -635.926212  | -636.401728  | -           |
| <b>9</b> (Vertical Ionization)                | doublet (D)               | -1045.403312 | -            | -            | -            | -2185.629110 | -           |
|                                               | quartet (Qu)              | -1045.405259 | -            | -            | -            | -2185.628565 | -           |
|                                               | sextet (S)                | -1045.432835 | -            | -            | -            | -2185.656157 | -           |
| <b>9</b>                                      | doublet (D)               | -1045.417367 | -1045.156783 | -1045.229440 | -1045.229205 | -2185.641777 | -           |
|                                               | quartet (Qu)              | -1045.431412 | -1045.172437 | -1045.249116 | -1045.248058 | -2185.656618 | -           |
|                                               | sextet (S)                | -1045.447041 | -1045.187260 | -1045.265757 | -1045.264796 | -2185.671032 | -           |

**Table S9.** Energies and thermochemistry parameters (at T = 298.15 K and P = 1 atm) of all computationally characterized stationary points reported in **Figure S18** and **Table S7**. Electronic energies (E), enthalpy (H), free energy (G), quasi harmonic corrected free energy (qh-G), and electronic energies from high level single point calculations (E (SP)) are given in a.u. Imaginary frequencies are given in cm<sup>-1</sup>.

| Structure                       | Electronic State | E            | H            | G            | G-qh         | E (SP)       | Imag. Freq. |
|---------------------------------|------------------|--------------|--------------|--------------|--------------|--------------|-------------|
| [ 4 + 1NF ]<br>(React. Complex) | triplet (T)      | -1781.579139 | -1781.011646 | -1781.135785 | -1781.132641 | -2922.100758 | -           |
|                                 | quintet (Q)      | -1781.613318 | -1781.046421 | -1781.171299 | -1781.168713 | -2922.131042 | -           |
| TS1                             | triplet (T)      | -1781.560523 | -1780.995458 | -1781.112601 | -1781.111215 | -2922.076167 | 693.0i      |
|                                 | quintet (Q)      | -1781.589261 | -1781.024786 | -1781.145692 | -1781.143766 | -2922.101400 | 790.5i      |
| [ 5 + 6 ]<br>(Int. Complex)     | triplet (T)      | -1781.623539 | -1781.057204 | -1781.177048 | -1781.175107 | -2922.124602 | -           |
|                                 | quintet (Q)      | -1781.646034 | -1781.080142 | -1781.202235 | -1781.200093 | -2922.159664 | -           |
| TS2                             | triplet (T)      | -1781.610331 | -1781.049991 | -1781.169258 | -1781.167125 | -2922.129568 | 1480.4i     |
|                                 | quintet (Q)      | -1781.632922 | -1781.073025 | -1781.192842 | -1781.191173 | -2922.149161 | 1493.2i     |
| [ 5 + 7 ]<br>(Int. Complex)     | triplet (T)      | -1781.643864 | -1781.077886 | -1781.197885 | -1781.195840 | -2922.157803 | -           |
|                                 | quintet (Q)      | -1781.663351 | -1781.097857 | -1781.220354 | -1781.218251 | -2922.182944 | -           |
| TS3-N3                          | triplet (T)      | -1781.626411 | -1781.060912 | -1781.180334 | -1781.177588 | -2922.148771 | 533.5i      |
|                                 | quintet (Q)      | -1781.659684 | -1781.094597 | -1781.213677 | -1781.212048 | -2922.178558 | 312.1i      |
| TS3-N1                          | triplet (T)      | -1781.622400 | -1781.056958 | -1781.174761 | -1781.172867 | -2922.142079 | 661.8i      |
|                                 | quintet (Q)      | -1781.658003 | -1781.092738 | -1781.213404 | -1781.211515 | -2922.177373 | 385.6i      |
| TS4                             | triplet (T)      | -1781.628168 | -1781.061968 | -1781.179413 | -1781.177424 | -2922.150028 | 619.8i      |
|                                 | quintet (Q)      | -1781.657144 | -1781.091841 | -1781.212057 | -1781.21048  | -2922.176560 | 527.2i      |
| [ 8 + 1N ]<br>(Prod. Complex)   | triplet (T)      | -1781.673073 | -1781.103961 | -1781.225614 | -1781.222735 | -2922.195358 | -           |
|                                 | quintet (Q)      | -1781.708619 | -1781.140001 | -1781.263901 | -1781.261051 | -2922.227506 | -           |
| [ 4 + 1F ]<br>(Prod. Complex)   | triplet (T)      | -1781.671151 | -1781.101818 | -1781.222246 | -1781.220075 | -2922.192948 | -           |
|                                 | quintet (Q)      | -1781.701630 | -1781.132868 | -1781.255756 | -1781.253647 | -2922.219965 | -           |



**Table S10. Cartesian coordinates (xyz, in Å) of all DFT optimized structures.**

|                         |           |           |           |                         |           |           |           |
|-------------------------|-----------|-----------|-----------|-------------------------|-----------|-----------|-----------|
| Coordination mode 1 (T) |           |           |           | C                       | -2.301318 | 3.566161  | 0.361391  |
|                         |           |           |           | H                       | -3.355140 | 3.829233  | 0.252476  |
| C                       | -0.729283 | 3.478590  | 1.793803  | H                       | -1.675963 | 4.319129  | -0.129010 |
| N                       | 0.624942  | 3.327813  | 2.012094  | C                       | -2.017839 | 2.189472  | -0.222005 |
| H                       | 1.216421  | 3.949978  | 2.545540  | O                       | -0.777624 | 1.853839  | -0.296033 |
| C                       | 1.032250  | 2.203366  | 1.374958  | O                       | -2.979227 | 1.465452  | -0.577600 |
| H                       | 2.047152  | 1.833708  | 1.381012  | Fe                      | 0.054900  | -0.088806 | -0.703781 |
| N                       | 0.012130  | 1.620498  | 0.761794  | N                       | 1.107714  | -1.694002 | -1.433615 |
| C                       | -1.093225 | 2.410217  | 1.018361  | N                       | 0.687592  | -2.740465 | -1.862111 |
| H                       | -2.065148 | 2.158455  | 0.620948  | N                       | 0.333531  | -3.763556 | -2.281806 |
| C                       | -2.819606 | -2.290124 | 1.778051  | O                       | -1.787981 | -0.530070 | -1.852942 |
| N                       | -3.623574 | -1.752880 | 0.792549  | H                       | -2.365377 | 0.187897  | -1.449318 |
| H                       | -4.623545 | -1.871639 | 0.706618  | H                       | -1.604845 | -0.242841 | -2.762780 |
| C                       | -2.842933 | -1.042614 | -0.052877 | H                       | 3.889860  | 2.503595  | 2.211881  |
| H                       | -3.193443 | -0.515162 | -0.925845 | H                       | -2.037730 | 3.569759  | 1.425718  |
| N                       | -1.576157 | -1.095054 | 0.340090  | H                       | -0.962836 | -3.051847 | 3.714771  |
| C                       | -1.549739 | -1.873271 | 1.484434  | O                       | 0.619888  | 1.310075  | -2.531313 |
| H                       | -0.619743 | -2.081232 | 1.988381  | H                       | 0.273284  | 2.033446  | -1.971258 |
| C                       | 3.016411  | -2.174752 | 1.846758  | H                       | 1.586734  | 1.381291  | -2.475809 |
| H                       | 4.053925  | -1.928265 | 2.079652  |                         |           |           |           |
| H                       | 2.957500  | -3.180658 | 1.419388  | Coordination mode 2 (T) |           |           |           |
| C                       | 2.420786  | -1.158875 | 0.885221  | C                       | -0.647011 | -3.803131 | -0.888708 |
| O                       | 1.258088  | -1.467895 | 0.403158  | N                       | -1.883890 | -3.391077 | -0.433778 |
| O                       | 3.049450  | -0.110888 | 0.620095  | H                       | -2.701300 | -3.973772 | -0.314958 |
| Fe                      | -0.014635 | -0.167204 | -0.537199 | C                       | -1.822543 | -2.061918 | -0.187860 |
| N                       | -1.196402 | 0.319277  | -2.066900 | H                       | -2.657208 | -1.467031 | 0.154246  |
| N                       | -0.932996 | 1.150456  | -2.907060 | N                       | -0.607571 | -1.601525 | -0.451997 |
| N                       | -0.748429 | 1.931359  | -3.742755 | C                       | 0.137595  | -2.680844 | -0.894333 |
| O                       | 1.635610  | 0.555717  | -1.545312 | H                       | 1.161257  | -2.547898 | -1.215621 |
| H                       | 2.295804  | 0.494368  | -0.798249 | C                       | 2.599605  | -0.637077 | 2.801477  |
| H                       | 1.858879  | -0.225386 | -2.107623 | N                       | 3.244043  | 0.449719  | 2.247372  |
| H                       | -3.214201 | -2.904792 | 2.571622  | H                       | 4.097974  | 0.872981  | 2.583803  |
| H                       | 2.431715  | -2.181750 | 2.774435  | C                       | 2.530863  | 0.867464  | 1.176731  |
| H                       | -1.287938 | 4.309301  | 2.195636  | H                       | 2.797160  | 1.700369  | 0.545328  |
| O                       | 1.949233  | -2.072019 | -2.380866 | N                       | 1.460982  | 0.098304  | 1.011584  |
| H                       | 1.678670  | -2.229730 | -1.453910 | C                       | 1.492404  | -0.843463 | 2.024044  |
| H                       | 1.180855  | -2.344709 | -2.907952 | H                       | 0.721913  | -1.592543 | 2.116227  |
|                         |           |           |           | C                       | -3.047651 | 1.787511  | 2.580590  |
| Coordination mode 1 (Q) |           |           |           | H                       | -4.137687 | 1.819059  | 2.529723  |
| C                       | -1.062423 | -2.364318 | 2.889568  | H                       | -2.664690 | 2.792447  | 2.791157  |
| N                       | -2.251902 | -1.724789 | 2.604121  | C                       | -2.453916 | 1.285786  | 1.272295  |
| H                       | -3.121565 | -1.828688 | 3.108562  | O                       | -1.182541 | 1.138332  | 1.251728  |
| C                       | -2.059246 | -0.942992 | 1.514896  | O                       | -3.226731 | 1.048527  | 0.304425  |
| H                       | -2.824535 | -0.323322 | 1.069867  | Fe                      | -0.011762 | 0.425300  | -0.304873 |
| N                       | -0.808113 | -1.040726 | 1.088577  | O                       | -1.534298 | 0.805439  | -1.626423 |
| C                       | -0.177361 | -1.927480 | 1.940510  | H                       | -2.308761 | 0.922924  | -0.972822 |
| H                       | 0.860268  | -2.191835 | 1.803058  | H                       | -1.431335 | 1.650838  | -2.097724 |
| C                       | 3.364290  | 1.807523  | 1.576985  | H                       | 2.978078  | -1.149656 | 3.671602  |
| N                       | 3.971291  | 0.680279  | 1.060483  | H                       | -2.732159 | 1.142614  | 3.407516  |
| H                       | 4.929389  | 0.395713  | 1.211012  | H                       | -0.449419 | -4.826769 | -1.165426 |
| C                       | 3.058133  | 0.017736  | 0.309388  | O                       | 2.877626  | -0.949764 | -1.926925 |
| H                       | 3.250575  | -0.905262 | -0.216819 | H                       | 2.381281  | -0.103020 | -1.913419 |
| N                       | 1.898062  | 0.657737  | 0.316210  | H                       | 3.192268  | -1.023650 | -1.013226 |
| C                       | 2.078074  | 1.777805  | 1.105892  | N                       | 1.286947  | 1.502771  | -1.455332 |
| H                       | 1.268948  | 2.473567  | 1.266312  | N                       | 0.864505  | 2.196177  | -2.354003 |

N 0.470687 2.874071 -3.207784

Coordination mode 2 (Q)

C -1.062423 -2.364318 2.889568  
N -2.251902 -1.724789 2.604121  
H -3.121565 -1.828688 3.108562  
C -2.059246 -0.942992 1.514896  
H -2.824535 -0.323322 1.069867  
N -0.808113 -1.040726 1.088577  
C -0.177361 -1.927480 1.940510  
H 0.860268 -2.191835 1.803058  
C 3.364290 1.807523 1.576985  
N 3.971291 0.680279 1.060483  
H 4.929389 0.395713 1.211012  
C 3.058133 0.017736 0.309388  
H 3.250575 -0.905262 -0.216819  
N 1.898062 0.657737 0.316210  
C 2.078074 1.777805 1.105892  
H 1.268948 2.473567 1.266312  
C -2.301318 3.566161 0.361391  
H -3.355140 3.829233 0.252476  
H -1.675963 4.319129 -0.129010  
C -2.017839 2.189472 -0.222005  
O -0.777624 1.853839 -0.296033  
O -2.979227 1.465452 -0.577600  
Fe 0.054900 -0.088806 -0.703781  
N 1.107714 -1.694002 -1.433615  
N 0.687592 -2.740465 -1.862111  
N 0.333531 -3.763556 -2.281806  
O -1.787981 -0.530070 -1.852942  
H -2.365377 0.187897 -1.449318  
H -1.604845 -0.242841 -2.762780  
H 3.889860 2.503595 2.211881  
H -2.037730 3.569759 1.425718  
H -0.962836 -3.051847 3.714771  
O 0.619888 1.310075 -2.531313  
H 0.273284 2.033446 -1.971258  
H 1.586734 1.381291 -2.475809

1NF (Conformer 1, CSS)

C -1.029394 -0.371469 -0.191572  
C -1.211214 -1.707668 -0.588410  
C -2.456845 -2.318246 -0.491628  
C -3.533622 -1.598680 0.031133  
C -3.352823 -0.278850 0.438782  
C -2.113838 0.369779 0.327316  
H -0.367072 -2.261596 -0.985240  
H -2.584844 -3.347173 -0.815144  
H -4.510443 -2.065488 0.125207  
H -4.192302 0.272073 0.856790  
C -2.016813 1.817074 0.772651  
H -0.993235 2.064293 1.065574  
H -2.643146 1.943107 1.664927  
C -2.480427 2.807931 -0.310301  
H -2.430033 3.836567 0.065088  
H -3.514967 2.608168 -0.612474  
H -1.840650 2.730528 -1.193446

C 0.302139 0.280114 -0.410725  
O 0.426695 1.397477 -0.901437  
N 1.431191 -0.502850 -0.146911  
C 2.816649 0.030041 0.035808  
C 3.729719 -1.175567 0.322983  
C 3.257182 0.674274 -1.291904  
C 2.857163 1.034521 1.199281  
H 3.496974 -1.644337 1.281096  
H 3.639534 -1.929181 -0.466256  
H 4.767878 -0.830498 0.352280  
H 2.679243 1.568711 -1.520125  
H 4.315354 0.944685 -1.209505  
H 3.150490 -0.036162 -2.118532  
H 3.884818 1.374610 1.365478  
H 2.236382 1.908041 0.982016  
H 2.499314 0.564953 2.121493  
F 1.151949 -1.415634 0.913352

TS rotation 1-2 (CSS)

C 1.012447 -0.350332 -0.157672  
C 0.970749 -1.739205 0.088120  
C 2.132767 -2.477439 0.279065  
C 3.368185 -1.833781 0.210612  
C 3.424407 -0.464277 -0.047938  
C 2.272989 0.310939 -0.233056  
H 0.004157 -2.224102 0.123984  
H 2.074023 -3.544492 0.471809  
H 4.288451 -2.394708 0.350215  
H 4.393258 0.024799 -0.111674  
C 2.462771 1.793975 -0.485398  
H 1.742330 2.153636 -1.222336  
H 3.464696 1.936892 -0.907719  
C 2.340192 2.643082 0.793763  
H 2.518058 3.699930 0.565144  
H 3.073519 2.329838 1.545616  
H 1.340741 2.554859 1.228517  
C -0.263899 0.382287 -0.343024  
O -0.365064 1.587143 -0.470000  
N -1.457835 -0.500363 -0.383817  
C -2.672935 -0.063934 0.362567  
C -3.696321 -1.198970 0.178755  
C -2.241360 0.017146 1.838271  
C -3.282678 1.269061 -0.110488  
H -3.966015 -1.307772 -0.875545  
H -3.286695 -2.151425 0.530633  
H -4.606817 -0.978983 0.746139  
H -1.538513 0.838221 2.012386  
H -3.125901 0.198692 2.457019  
H -1.780657 -0.919316 2.170557  
H -4.237334 1.427693 0.403440  
H -2.626895 2.114620 0.098882  
H -3.475486 1.239674 -1.186126  
F -1.788161 -0.435998 -1.799520

1NF (Conformer 2, CSS)

C -0.974534 -0.572106 0.427218

C -1.518127 -1.798703 0.010738  
C -2.772133 -1.854947 -0.587612  
C -3.510400 -0.677857 -0.739471  
C -2.993674 0.530393 -0.278671  
C -1.723509 0.617283 0.314525  
H -0.939672 -2.707182 0.153577  
H -3.175216 -2.806663 -0.921330  
H -4.496014 -0.705827 -1.196081  
H -3.594718 1.433182 -0.360200  
C -1.272037 1.957302 0.872897  
H -0.398059 1.830246 1.516365  
H -2.076539 2.336911 1.516495  
C -0.960610 3.018323 -0.195626  
H -0.728890 3.978618 0.278216  
H -1.811022 3.172205 -0.869310  
H -0.097567 2.727332 -0.803016  
C 0.360509 -0.629094 1.114449  
O 0.519369 -1.241195 2.155801  
N 1.379977 0.168188 0.538185  
C 2.030823 -0.112943 -0.797854  
C 2.751196 -1.472105 -0.747949  
C 0.982880 -0.104859 -1.920755  
C 3.031789 1.029996 -1.040310  
H 3.473979 -1.501534 0.070688  
H 2.038016 -2.292667 -0.612533  
H 3.286470 -1.640997 -1.688155  
H 0.397534 0.817957 -1.925703  
H 1.519876 -0.170878 -2.872682  
H 0.297166 -0.951712 -1.864228  
H 3.514184 0.887520 -2.012541  
H 2.518875 1.997331 -1.047303  
H 3.806172 1.053058 -0.271325  
F 2.450844 0.190138 1.478433

#### 1NF (Conformer 3, CSS)

C 1.172390 -0.469398 0.196140  
C 1.826950 -1.703886 0.317939  
C 3.170280 -1.841384 -0.022667  
C 3.878259 -0.723838 -0.463490  
C 3.237585 0.512410 -0.554238  
C 1.882383 0.674598 -0.235743  
H 1.264477 -2.559642 0.678735  
H 3.657140 -2.808698 0.060653  
H 4.928279 -0.809120 -0.730058  
H 3.802744 1.382819 -0.878916  
C 1.278944 2.066124 -0.290310  
H 0.326777 2.046887 -0.825268  
H 1.950042 2.707828 -0.873045  
C 1.076658 2.692899 1.101541  
H 0.659479 3.702115 1.009816  
H 2.027189 2.765211 1.641799  
H 0.388942 2.099808 1.713953  
C -0.261143 -0.476449 0.649246  
O -0.591917 -0.965480 1.724323  
N -1.208985 0.131393 -0.172045  
C -2.676678 -0.160415 -0.150656  
C -2.928195 -1.653092 -0.419871  
C -3.225320 0.273511 1.221295

C -3.328678 0.709913 -1.239514  
H -2.494744 -1.946301 -1.381736  
H -2.490076 -2.270445 0.369270  
H -4.004648 -1.851335 -0.455069  
H -2.975774 1.320823 1.421856  
H -4.316455 0.180578 1.201159  
H -2.830891 -0.342590 2.028119  
H -4.415146 0.595804 -1.174681  
H -3.084413 1.767070 -1.092258  
H -3.012377 0.414657 -2.241874  
F -0.755882 0.111406 -1.524527

#### 1NF radical anion (D)

C -1.107100 -0.313417 0.185858  
C -1.267166 -1.689760 -0.043898  
C -2.533307 -2.240978 -0.244088  
C -3.660323 -1.419576 -0.231393  
C -3.504682 -0.049702 -0.016790  
C -2.246047 0.529927 0.200441  
H -0.360605 -2.293625 -0.049374  
H -2.637597 -3.311369 -0.410101  
H -4.653259 -1.836273 -0.387475  
H -4.382130 0.595100 -0.016754  
C -2.169928 2.036865 0.372856  
H -1.523718 2.276491 1.219246  
H -3.175772 2.414379 0.599427  
C -1.638682 2.758265 -0.878810  
H -1.608400 3.843399 -0.719911  
H -2.274864 2.560437 -1.750055  
H -0.624416 2.425880 -1.122073  
C 0.287772 0.231819 0.449473  
O 0.443542 1.116364 1.323017  
N 1.254539 -0.209696 -0.391157  
C 2.668067 0.136876 -0.184320  
C 3.455537 -0.688612 -1.219199  
C 2.858079 1.642252 -0.487394  
C 3.179203 -0.200589 1.230639  
H 3.226413 -1.740859 -1.044714  
H 3.145657 -0.425937 -2.238655  
H 4.534725 -0.509185 -1.127863  
H 2.328141 2.253629 0.246520  
H 3.925983 1.896703 -0.460213  
H 2.478148 1.885615 -1.487384  
H 4.261431 -0.026120 1.302636  
H 2.674144 0.410411 1.982189  
H 2.959945 -1.253613 1.416669  
F 1.494170 -2.336479 0.155733

#### 4 (T)

C 1.200840 1.925866 3.079051  
N 2.357985 1.305625 2.653563  
H 3.252111 1.322363 3.124585  
C 2.090980 0.676008 1.483342  
H 2.818645 0.103540 0.926615  
N 0.825866 0.854911 1.135490  
C 0.260649 1.633872 2.126376

H -0.776261 1.932439 2.081338  
C -3.377238 -1.814662 1.197974  
N -3.977099 -0.678973 0.690506  
H -4.950902 -0.425108 0.783140  
C -3.039850 0.037498 0.029888  
H -3.217085 0.973707 -0.475215  
N -1.866188 -0.579847 0.087450  
C -2.065701 -1.740026 0.815597  
H -1.253943 -2.428154 0.986258  
C 1.978103 -3.721061 -0.407361  
H 3.008371 -4.021011 -0.607201  
H 1.291829 -4.326646 -1.008225  
C 1.771161 -2.246383 -0.715824  
O 0.565357 -1.819501 -0.603433  
O 2.761950 -1.545675 -1.046681  
Fe -0.131311 0.077226 -0.712054  
N -1.108479 1.620033 -1.512070  
N -0.587861 2.633470 -1.919762  
N -0.153704 3.627584 -2.328925  
O 1.586697 0.653089 -1.700470  
H 2.174883 -0.159596 -1.533433  
H 1.431866 0.692750 -2.658457  
H -3.925177 -2.551020 1.764387  
H 1.741657 -3.912056 0.645721  
H 1.158755 2.501315 3.990540

#### 4 (Q)

C -0.033884 3.553158 1.862771  
N 1.313262 3.476953 1.567669  
H 2.019682 4.152646 1.825450  
C 1.530344 2.340006 0.869306  
H 2.491875 2.017044 0.501154  
N 0.392627 1.678366 0.698437  
C -0.591504 2.429449 1.316036  
H -1.621124 2.105774 1.321787  
C -4.035316 -0.798890 0.627087  
N -4.106642 -0.405151 -0.694056  
H -4.948901 -0.314746 -1.245462  
C -2.846418 -0.171111 -1.132487  
H -2.596180 0.143651 -2.134217  
N -1.969825 -0.389773 -0.163867  
C -2.701916 -0.784418 0.940570  
H -2.216326 -1.041084 1.869828  
C 1.233813 -3.559973 2.185127  
H 2.138427 -4.138590 2.380489  
H 0.452733 -4.217497 1.788601  
C 1.510096 -2.436752 1.197706  
O 0.487413 -1.710893 0.890568  
O 2.667256 -2.276893 0.753735  
Fe 0.222420 -0.175314 -0.385059  
N -0.031357 0.198298 -2.392491  
N 0.903926 0.262761 -3.150885  
N 1.797065 0.322805 -3.892881  
O 2.484320 -0.086437 -0.675530  
H 2.690699 -0.943003 -0.182834  
H 2.721240 -0.238512 -1.606733  
H -4.913844 -1.049244 1.200876  
H 0.857062 -3.139629 3.124209

H -0.454861 4.376510 2.418023

#### 5 (D)

C -0.491444 -0.553393 3.647917  
N -1.789790 -0.408701 3.199874  
H -2.622384 -0.392742 3.773016  
C -1.766558 -0.307409 1.853498  
H -2.643896 -0.189508 1.235572  
N -0.515644 -0.375589 1.416140  
C 0.290425 -0.532533 2.526289  
H 1.358977 -0.633791 2.429210  
C 2.758798 2.718184 0.355364  
N 3.605671 1.662288 0.081759  
H 4.615778 1.693505 0.067308  
C 2.854988 0.570170 -0.179654  
H 3.244564 -0.404583 -0.423466  
N 1.568440 0.873928 -0.082746  
C 1.491922 2.213418 0.247355  
H 0.538607 2.702641 0.357995  
C -2.856000 2.699313 -1.374964  
H -3.938170 2.681396 -1.515199  
H -2.377440 3.077759 -2.284937  
C -2.330879 1.306105 -1.076934  
O -1.083394 1.241610 -0.777265  
O -3.114806 0.324666 -1.126526  
Fe 0.066350 -0.357704 -0.517035  
N 1.244006 -1.860685 -0.117256  
N 1.108889 -2.874411 -0.772109  
N 1.037326 -3.867612 -1.357687  
O -1.412556 -1.594923 -1.074758  
H -2.203889 -0.951599 -1.124300  
H -1.130307 -1.720161 -2.002086  
H 3.125568 3.704611 0.590943  
H -2.595545 3.383634 -0.561159  
H -0.251766 -0.658113 4.694055  
F 0.502338 -0.387914 -2.281631

#### 5 (Qu)

C 1.065030 1.885844 3.006826  
N 2.123631 1.016609 2.831066  
H 2.915085 0.906350 3.450636  
C 1.935514 0.343834 1.675752  
H 2.612684 -0.400224 1.284374  
N 0.807001 0.738547 1.099857  
C 0.254379 1.702917 1.920881  
H -0.671426 2.191218 1.662024  
C -3.850038 -1.217190 0.963930  
N -4.163149 0.033058 0.466490  
H -5.076653 0.465710 0.469999  
C -3.034810 0.576282 -0.046507  
H -2.983712 1.548082 -0.512555  
N -2.014471 -0.255531 0.098152  
C -2.511806 -1.381044 0.725702  
H -1.869388 -2.219550 0.942592  
C 1.362196 -3.913530 0.193445  
H 2.342265 -4.393529 0.184247

H 0.697488 -4.423047 -0.512407  
C 1.481425 -2.448631 -0.194765  
O 0.369207 -1.792840 -0.138917  
O 2.592313 -1.978935 -0.521218  
Fe 0.011498 0.050318 -0.729399  
N -0.533877 1.877985 -1.096327  
N 0.282717 2.664575 -1.539513  
N 0.985642 3.475838 -1.960244  
O 2.100009 0.399729 -1.560412  
H 2.443083 -0.484513 -1.239213  
H 1.878497 0.250708 -2.496070  
H -4.589499 -1.853866 1.423834  
H 0.912756 -4.003799 1.187872  
H 0.991343 2.537495 3.862900  
F -0.335276 -0.511265 -2.416382

5 (S)

C -0.578957 -2.552448 2.562587  
N -1.858328 -2.078355 2.355066  
H -2.684607 -2.341486 2.874778  
C -1.824114 -1.206497 1.322070  
H -2.688365 -0.676018 0.951061  
N -0.588961 -1.093657 0.854194  
C 0.197030 -1.931870 1.621696  
H 1.256858 -2.028347 1.442673  
C 3.300735 1.907531 1.412076  
N 3.952720 0.897576 0.731070  
H 4.943612 0.699152 0.762287  
C 3.041010 0.223228 -0.002431  
H 3.267315 -0.613802 -0.644856  
N 1.835454 0.746639 0.176713  
C 1.983939 1.802581 1.055818  
H 1.133803 2.398102 1.347655  
C -2.483761 3.308047 0.875062  
H -3.553601 3.523309 0.859884  
H -1.935445 4.139925 0.419842  
C -2.177241 2.027423 0.118272  
O -0.944828 1.668005 0.103702  
O -3.113528 1.395974 -0.433898  
Fe 0.054774 0.158151 -0.892265  
N 0.955129 -1.479821 -1.631939  
N 0.606615 -2.634122 -1.548510  
N 0.310924 -3.750864 -1.494481  
O -1.832518 -0.400327 -1.779667  
H -2.456790 0.274952 -1.336841  
H -1.732429 -0.111697 -2.703806  
H 3.821853 2.588404 2.066322  
H -2.138834 3.219431 1.910926  
H -0.348736 -3.269417 3.334678  
F 0.396835 1.228514 -2.343611

6 (D)

C 0.415937 -1.045754 0.146949  
O 0.828013 -2.207913 -0.000618  
N 1.304444 -0.075399 0.542566  
H -0.029242 1.778742 -0.795849

C 2.643818 0.078728 -0.028098  
C 3.070046 1.537278 0.236212  
C 3.578317 -0.869228 0.772453  
C 2.715250 -0.237025 -1.533346  
H 2.436486 2.239585 -0.315442  
H 3.001941 1.774009 1.302587  
H 4.105312 1.683675 -0.089651  
H 3.304426 -1.910514 0.594088  
H 4.612608 -0.702473 0.450099  
H 3.508939 -0.663176 1.845040  
H 3.739250 -0.096015 -1.895846  
H 2.416855 -1.268385 -1.735052  
H 2.061870 0.435188 -2.101668  
C -1.046151 -0.721576 0.080003  
C -1.894356 -1.840102 0.030890  
C -1.595296 0.586856 0.045207  
C -3.276063 -1.699888 -0.031267  
H -1.437487 -2.823542 0.049013  
C -2.990838 0.700139 -0.019615  
C -3.824785 -0.418350 -0.054392  
H -3.914895 -2.577892 -0.059856  
H -3.443346 1.684972 -0.048383  
H -4.902060 -0.282977 -0.103636  
C -0.722897 1.832690 0.054350  
C -1.449072 3.181186 0.000735  
H -2.112033 3.321878 0.861657  
H -0.714355 3.993020 0.013633  
H -2.047199 3.290096 -0.910899  
H -0.085749 1.805178 0.946656

9 (D)

C -1.097120 -0.747171 3.229862  
N -2.233030 -1.150843 2.559160  
H -3.080309 -1.507732 2.982928  
C -2.039945 -0.993028 1.238650  
H -2.767980 -1.221039 0.477798  
N -0.817806 -0.503942 1.027366  
C -0.216212 -0.345585 2.266435  
H 0.783575 0.043355 2.368469  
C 3.881779 0.630098 0.564490  
N 3.911320 -0.724825 0.300545  
H 4.714350 -1.333429 0.395976  
C 2.694666 -1.110845 -0.120336  
H 2.429936 -2.114999 -0.407952  
N 1.873546 -0.060608 -0.139962  
C 2.607955 1.037169 0.287308  
H 2.162631 2.015829 0.344580  
C -0.663229 4.073818 -0.180774  
H -1.547728 4.710253 -0.223771  
H 0.099015 4.446355 -0.872686  
C -1.019828 2.650254 -0.534552  
O -0.012203 1.820590 -0.563323  
O -2.198593 2.327778 -0.781976  
Fe -0.018999 -0.089353 -0.700715  
N 0.241071 -1.798862 -1.428763  
N -0.668323 -2.604365 -1.591962  
N -1.458249 -3.415708 -1.772442  
O -1.862850 -0.062122 -1.455444

H -2.165423 0.910430 -1.242376  
H -1.869369 -0.163514 -2.424175  
H 4.749325 1.169000 0.910532  
H -0.233609 4.103865 0.826378  
H -1.019367 -0.779359 4.304756

9 (Qu)

C -1.505679 1.493086 -3.079484  
N -2.671946 1.256382 -2.381347  
H -3.612177 1.416731 -2.719571  
C -2.354172 0.769818 -1.165938  
H -3.074474 0.496535 -0.410820  
N -1.032269 0.681406 -1.045766  
C -0.490431 1.132209 -2.237826  
H 0.575732 1.159676 -2.401218  
C 3.886961 0.052253 -0.865499  
N 3.834737 1.234529 -0.150617  
H 4.582923 1.910658 -0.061930  
C 2.625440 1.343228 0.420964  
H 2.302305 2.166473 1.037073  
N 1.885896 0.277214 0.107471  
C 2.668416 -0.539108 -0.698463  
H 2.292299 -1.475804 -1.073147  
C -0.031009 -4.164485 -0.474831  
H -0.717850 -4.988217 -0.277407  
H 0.970858 -4.419854 -0.114447  
C -0.508418 -2.906814 0.207734  
O 0.252971 -1.865143 0.052258  
O -1.567318 -2.911540 0.875805  
Fe -0.012854 -0.036900 0.657677  
N 0.083989 1.585634 1.649806  
N -0.936797 2.108886 2.081928  
N -1.839563 2.669189 2.515706  
O -1.662685 -0.563896 1.570116  
H -1.747500 -1.615011 1.381523  
H -1.739410 -0.382730 2.523012  
H 4.766010 -0.252320 -1.410770  
H 0.042375 -3.990956 -1.553454  
H -1.505604 1.885044 -4.084078

9 (S)

C -3.440730 -2.063360 -0.514752  
N -2.663146 -3.127767 -0.103465  
H -2.956716 -4.095119 -0.051381  
C -1.440387 -2.671729 0.216915  
H -0.626163 -3.283777 0.569182  
N -1.387229 -1.351257 0.031261  
C -2.637779 -0.962506 -0.428323  
H -2.861738 0.065156 -0.662284  
C -1.364636 3.174177 -1.784649  
N -1.747664 3.474987 -0.492066  
H -2.263989 4.294743 -0.199244  
C -1.300319 2.503278 0.324885  
H -1.455343 2.486769 1.392443  
N -0.647547 1.581495 -0.380677  
C -0.680635 1.993989 -1.703428

H -0.201834 1.420475 -2.480781  
C 3.377752 -0.089632 -2.594743  
H 4.275935 -0.668818 -2.811576  
H 3.642783 0.956873 -2.411589  
C 2.667536 -0.651436 -1.387384  
O 1.572999 -0.014827 -1.043768  
O 3.105430 -1.643900 -0.783797  
Fe 0.292359 -0.163913 0.399065  
N 0.277416 0.484419 2.190760  
N 1.017743 1.104024 2.928811  
N 1.675550 1.688220 3.668004  
O 1.289316 -1.953336 0.982819  
H 2.106446 -1.977198 0.366084  
H 1.601899 -1.936805 1.903264  
H -1.603841 3.814475 -2.618800  
H 2.705302 -0.109570 -3.458858  
H -4.466704 -2.184489 -0.823693

[ 4 + 1NF ] (React. Complex, T)

Fe 1.737812 -0.218659 -0.309367  
N 3.952510 -0.481704 0.091749  
C 4.562938 -0.299916 1.251394  
C 4.932443 -0.871673 -0.801122  
H 4.085753 0.010088 2.168883  
C 6.145218 -0.923314 -0.164779  
H 4.694039 -1.078570 -1.834063  
N 5.890308 -0.556528 1.140818  
H 6.570297 -0.492461 1.886053  
H 7.136115 -1.177957 -0.507110  
N 1.777293 1.795113 -0.517046  
C 1.974858 2.447582 -1.655263  
C 1.627642 2.755472 0.467909  
H 2.113480 1.979043 -2.616552  
N 1.962060 3.782368 -1.437597  
C 1.741997 3.998892 -0.091258  
H 1.441550 2.464870 1.488445  
H 2.085558 4.492645 -2.145560  
H 1.684559 4.990295 0.329763  
O 1.422639 -2.222399 -0.110874  
H 1.238122 -2.295820 0.891988  
H 2.243377 -2.709254 -0.289970  
O 0.904329 -2.004413 2.386734  
C 0.948572 -0.756213 2.538077  
C 0.553920 -0.163510 3.882044  
H 1.309386 0.554501 4.216897  
H -0.388020 0.385371 3.767015  
H 0.423617 -0.946461 4.631432  
O 1.292126 0.092105 1.638588  
C -2.711034 2.971001 2.008314  
C -3.087675 1.640587 1.836640  
C -3.185247 1.076469 0.556054  
C -2.944760 1.865614 -0.591617  
C -2.584042 3.205580 -0.391668  
C -2.455159 3.756415 0.884167  
H -2.626462 3.388835 3.007425  
H -3.310075 1.019554 2.699239  
H -2.404810 3.830485 -1.263412  
H -2.165772 4.797909 0.996658

C -3.140575 1.360295 -2.009175  
C -4.624294 1.236881 -2.403990  
H -2.645204 0.396010 -2.142362  
H -2.647813 2.059617 -2.694807  
H -4.717336 0.886090 -3.438071  
H -5.153506 0.526496 -1.759449  
H -5.134543 2.203630 -2.324617  
C -3.653382 -0.352609 0.533471  
O -4.657281 -0.707184 1.145330  
N -2.938339 -1.260996 -0.236388  
C -2.945147 -2.747489 -0.055262  
C -4.367927 -3.243159 -0.378609  
C -2.527653 -3.117547 1.378158  
H -4.366460 -4.338128 -0.349128  
H -5.098968 -2.870000 0.337932  
H -4.665518 -2.929133 -1.384852  
H -1.529263 -2.731602 1.608652  
H -3.240991 -2.719183 2.105534  
H -2.503360 -4.207723 1.484720  
F -1.599993 -0.805420 -0.416702  
C -1.967262 -3.343223 -1.083544  
H -2.206865 -3.001501 -2.095934  
H -0.929357 -3.085606 -0.864614  
H -2.065329 -4.433528 -1.059059  
N 1.737887 -0.391300 -2.296410  
N 1.517345 -1.416876 -2.896948  
N 1.320299 -2.366685 -3.533190

[ 4 + 1NF ] (React. Complex, Q)

Fe 1.797284 -0.314573 -0.254941  
N 3.947691 -0.644276 0.017737  
C 4.608742 -0.596805 1.164552  
C 4.884959 -0.921342 -0.960119  
H 4.171963 -0.397075 2.131356  
C 6.123485 -1.041266 -0.387177  
H 4.598022 -1.011369 -1.997155  
N 5.927842 -0.831710 0.962274  
H 6.640827 -0.850254 1.678654  
H 7.097254 -1.250567 -0.801316  
N 1.841655 1.893697 -0.452597  
C 1.833653 2.550375 -1.602189  
C 1.890042 2.851109 0.542090  
H 1.791017 2.089361 -2.577227  
N 1.878759 3.887460 -1.385822  
C 1.915772 4.099307 -0.021712  
H 1.887768 2.565379 1.582294  
H 1.883534 4.600714 -2.101762  
H 1.951872 5.089457 0.405084  
O 1.390247 -2.486590 0.024503  
H 1.081410 -2.450757 0.985733  
H 2.230348 -2.972854 0.029269  
O 0.621722 -2.027088 2.488417  
C 0.837693 -0.799557 2.621670  
C 0.436888 -0.109592 3.916633  
H 1.268122 0.491949 4.298535  
H -0.393202 0.576437 3.711165  
H 0.125222 -0.836939 4.668700  
O 1.375564 -0.040534 1.731920

C -2.579610 2.998304 2.042797  
C -3.040175 1.700361 1.830783  
C -3.083299 1.150548 0.540985  
C -2.701853 1.924777 -0.578151  
C -2.257814 3.232890 -0.338853  
C -2.182093 3.766586 0.948475  
H -2.539157 3.404549 3.049413  
H -3.371444 1.093910 2.668416  
H -1.968208 3.846336 -1.188744  
H -1.823731 4.782373 1.092444  
C -2.831405 1.441339 -2.010828  
C -4.289159 1.414707 -2.507407  
H -2.389270 0.448525 -2.119610  
H -2.249367 2.111744 -2.654048  
H -4.332707 1.074935 -3.548389  
H -4.905600 0.736777 -1.907050  
H -4.741455 2.411686 -2.454653  
C -3.650435 -0.240625 0.470134  
O -4.719870 -0.523677 1.003060  
N -2.947883 -1.195620 -0.253929  
C -3.069493 -2.678328 -0.080113  
C -4.497080 -3.075268 -0.502729  
C -2.776151 -3.072529 1.377435  
H -4.574114 -4.167483 -0.472170  
H -5.248723 -2.647895 0.160073  
H -4.700166 -2.747344 -1.527909  
H -1.777392 -2.739127 1.677765  
H -3.516234 -2.636643 2.054910  
H -2.817840 -4.162535 1.480503  
F -1.571150 -0.835216 -0.334628  
C -2.066373 -3.341769 -1.040501  
H -2.194523 -2.970389 -2.062364  
H -1.030717 -3.176215 -0.738101  
H -2.255586 -4.420325 -1.042394  
N 1.555745 -0.467051 -2.264029  
N 1.162986 -1.396537 -2.926031  
N 0.795203 -2.258355 -3.608910

TS1 (T)

Fe -1.233925 -0.040894 -0.241202  
N -3.299966 -0.811928 -0.365266  
C -4.431405 -0.132015 -0.489480  
C -3.654848 -2.144431 -0.281487  
H -4.511301 0.940788 -0.587369  
C -5.016954 -2.262841 -0.354276  
H -2.902754 -2.912595 -0.188126  
N -5.492393 -0.973483 -0.485967  
H -6.461934 -0.700558 -0.572548  
H -5.674335 -3.117790 -0.329974  
N -0.810524 -0.995660 1.467713  
C -0.122988 -2.123674 1.579199  
C -1.152899 -0.606439 2.750497  
H 0.303983 -2.671479 0.755257  
N -0.019500 -2.475457 2.879700  
C -0.666503 -1.522802 3.642256  
H -1.706282 0.302215 2.920345  
H 0.477140 -3.284164 3.226111  
H -0.718823 -1.583406 4.717796

O -1.557346 0.982875 -1.956701  
H -2.158362 1.732500 -1.619593  
H -2.076399 0.450200 -2.583091  
O -2.908784 2.766195 -0.685826  
C -2.508946 2.545848 0.486847  
C -2.867351 3.526624 1.590949  
H -3.454499 3.016656 2.362814  
H -1.953486 3.894440 2.068991  
H -3.438119 4.367690 1.193450  
O -1.810035 1.533123 0.851311  
C 3.493510 -2.870569 1.477900  
C 3.370379 -1.484758 1.505061  
C 3.087818 -0.747520 0.341605  
C 2.950474 -1.415944 -0.899568  
C 3.090853 -2.812965 -0.900691  
C 3.349930 -3.540142 0.261013  
H 3.709480 -3.418474 2.391226  
H 3.496658 -0.942908 2.436796  
H 2.996763 -3.339879 -1.847112  
H 3.448023 -4.621636 0.211834  
C 2.750720 -0.720414 -2.232713  
C 4.047297 -0.096339 -2.780650  
H 1.981075 0.045900 -2.147597  
H 2.383158 -1.461692 -2.951956  
H 3.865927 0.362243 -3.759603  
H 4.427740 0.682453 -2.110787  
H 4.833201 -0.851476 -2.899952  
C 3.068044 0.739340 0.553838  
O 3.840325 1.253841 1.368156  
N 2.260424 1.526670 -0.254453  
C 1.975194 2.948160 0.011727  
C 3.317647 3.703115 -0.185258  
C 1.399260 3.198091 1.415316  
H 3.108905 4.778564 -0.160388  
H 4.032618 3.455916 0.598600  
H 3.757623 3.463944 -1.159232  
H 0.444300 2.677495 1.528186  
H 2.090811 2.855621 2.188896  
H 1.228207 4.271752 1.556281  
F 0.738624 0.732315 -0.238636  
C 1.001749 3.437202 -1.075830  
H 1.399977 3.224354 -2.073398  
H 0.027491 2.957826 -0.985606  
H 0.870084 4.520452 -0.979257  
N -0.601578 -1.651715 -1.233134  
N -0.781729 -1.723968 -2.423876  
N -0.939250 -1.839594 -3.569725

TS1 (Q)

Fe 1.220613 -0.395748 -0.302538  
N 3.469851 -0.575504 -0.365714  
C 4.290926 -0.517868 0.672106  
C 4.269844 -0.631571 -1.492337  
H 3.986552 -0.455489 1.705371  
C 5.587730 -0.610666 -1.119675  
H 3.832207 -0.676818 -2.478028  
N 5.580368 -0.537161 0.258913  
H 6.393276 -0.504858 0.859089

H 6.503816 -0.641534 -1.688388  
N 1.347268 1.775178 -0.089363  
C 1.423526 2.621952 -1.105731  
C 1.578671 2.513482 1.055343  
H 1.301379 2.354575 -2.143873  
N 1.696939 3.869393 -0.659768  
C 1.799204 3.821326 0.716933  
H 1.563426 2.041019 2.024234  
H 1.803345 4.691268 -1.238235  
H 2.007580 4.698886 1.308579  
O 1.373110 -2.611426 -0.338518  
H 1.246108 -2.759267 0.654996  
H 2.316847 -2.772517 -0.502401  
O 1.087174 -2.639868 2.266145  
C 1.143679 -1.428333 2.581356  
C 0.964446 -1.033169 4.039404  
H 1.719957 -0.297402 4.332286  
H -0.016874 -0.559519 4.161364  
H 1.018732 -1.907640 4.690723  
O 1.337215 -0.455681 1.760487  
C -2.151816 3.181210 2.053099  
C -2.463904 1.830828 1.938550  
C -2.562906 1.205489 0.683458  
C -2.365619 1.957602 -0.498900  
C -2.072355 3.322713 -0.355196  
C -1.957833 3.933298 0.893144  
H -2.070023 3.642226 3.033367  
H -2.646693 1.234499 2.827077  
H -1.938133 3.919905 -1.254267  
H -1.724464 4.992851 0.958248  
C -2.544817 1.407618 -1.902074  
C -4.023760 1.313585 -2.320953  
H -2.083935 0.423604 -1.992683  
H -2.022250 2.073353 -2.599725  
H -4.106836 0.944780 -3.349606  
H -4.576919 0.625866 -1.671887  
H -4.514675 2.292404 -2.267805  
C -3.029219 -0.218896 0.734599  
O -3.924673 -0.543040 1.518903  
N -2.527316 -1.119447 -0.196460  
C -2.752852 -2.574981 -0.116544  
C -4.259555 -2.772135 -0.442049  
C -2.400211 -3.184329 1.250657  
H -4.448027 -3.848447 -0.524314  
H -4.894690 -2.356218 0.340135  
H -4.514279 -2.306748 -1.399886  
H -1.348661 -3.009090 1.494274  
H -3.024236 -2.762687 2.041550  
H -2.566540 -4.267267 1.218643  
F -0.814179 -0.939260 -0.092365  
C -1.936607 -3.240840 -1.239628  
H -2.120759 -2.748183 -2.199488  
H -0.866961 -3.201884 -1.031360  
H -2.240241 -4.290353 -1.323104  
N 1.107269 -0.216236 -2.312750  
N 0.383606 -0.736833 -3.126247  
N -0.283469 -1.202862 -3.951057

[ 5 + 6 ] (Int. Complex, T)



C -4.597106 2.860264 0.948074  
N -4.026091 2.601639 2.179198  
H -4.278414 3.034033 3.057563  
C -3.050977 1.683911 2.013502  
H -2.414105 1.319211 2.805154  
N -2.967088 1.339999 0.733767  
C -3.925500 2.070348 0.057211  
H -4.041429 1.980642 -1.010479  
C -4.688678 -3.077570 -0.979117  
N -4.823574 -2.253005 -2.078277  
H -5.436594 -2.404643 -2.867542  
C -3.973326 -1.210265 -1.926337  
H -3.869087 -0.412473 -2.645413  
N -3.304194 -1.318268 -0.789088  
C -3.741671 -2.482893 -0.188722  
H -3.331985 -2.798940 0.757113  
C -1.303956 -2.197027 3.627480  
H -0.927873 -1.971930 4.627133  
H -0.751915 -3.049974 3.217195  
C -1.126594 -0.999329 2.707161  
O -1.684273 -1.119867 1.552379  
O -0.478057 -0.003494 3.099957  
Fe -1.620174 0.023199 -0.072134  
N -1.725893 1.036378 -1.731152  
N -1.120619 0.629514 -2.706772  
N -0.579294 0.321001 -3.676161  
O -0.078154 1.313006 0.839997  
H -0.085930 0.918487 1.760644  
H 0.810465 1.122609 0.462130  
H -5.260690 -3.985539 -0.868975  
H -2.358989 -2.484302 3.679837  
H -5.403947 3.565006 0.824370  
C 3.710902 0.791324 0.649820  
O 4.293572 1.510881 1.472099  
N 2.716631 1.364988 -0.129134  
H 1.846783 -0.641291 -1.406146  
C 2.899624 2.647549 -0.823114  
C 1.881066 2.678050 -1.980955  
C 2.530004 3.761002 0.197635  
C 4.328769 2.856494 -1.356056  
H 2.084476 1.889617 -2.711726  
H 0.860874 2.547632 -1.608039  
H 1.942877 3.644403 -2.493038  
H 3.255373 3.784893 1.012677  
H 2.529730 4.726234 -0.321864  
H 1.533428 3.583065 0.611961  
H 4.394919 3.824953 -1.863329  
H 5.061823 2.842658 -0.545995  
H 4.592244 2.078953 -2.082548  
C 3.935573 -0.685436 0.599901  
C 4.618652 -1.212425 1.710050  
C 3.546228 -1.535499 -0.468052  
C 4.906920 -2.568746 1.803849  
H 4.911493 -0.528059 2.498827  
C 3.855833 -2.898063 -0.349717  
C 4.518768 -3.414616 0.764387  
H 5.425668 -2.959972 2.674265  
H 3.576240 -3.575687 -1.148344  
H 4.734687 -4.478762 0.813958

C 2.833994 -1.011540 -1.704155  
C 2.638598 -2.006899 -2.853798  
H 1.998650 -2.845060 -2.557183  
H 2.143596 -1.501062 -3.688903  
H 3.590441 -2.411587 -3.218009  
F -0.310335 -1.024804 -0.758711  
H 3.388153 -0.144787 -2.087821

[ 5 + 6 ] (Int. Complex, Q)

C -4.721877 2.903746 0.510141  
N -4.126125 2.861146 1.755345  
H -4.373054 3.427068 2.555734  
C -3.137519 1.939039 1.719445  
H -2.489978 1.713472 2.553869  
N -3.067278 1.386134 0.517060  
C -4.050503 1.982881 -0.247635  
H -4.188953 1.716079 -1.283535  
C -4.692100 -3.182869 -0.605864  
N -4.727054 -2.566633 -1.841507  
H -5.313402 -2.826952 -2.622810  
C -3.828553 -1.557430 -1.835739  
H -3.641882 -0.906710 -2.675444  
N -3.220967 -1.490695 -0.659189  
C -3.750839 -2.503391 0.118332  
H -3.404008 -2.656116 1.127281  
C -1.413791 -1.718040 3.986708  
H -0.959436 -1.383432 4.921022  
H -0.968000 -2.672509 3.685704  
C -1.200483 -0.695534 2.882924  
O -1.766559 -0.962544 1.759488  
O -0.514625 0.329861 3.111641  
Fe -1.579814 -0.141597 -0.135608  
N -1.685603 0.735879 -1.958402  
N -0.991618 0.427995 -2.901324  
N -0.355445 0.177356 -3.834340  
O -0.161211 1.224678 0.679802  
H -0.181610 0.986709 1.662849  
H 0.760901 1.067742 0.363237  
H -5.321023 -4.025771 -0.366416  
H -2.484917 -1.891528 4.135393  
H -5.541561 3.568353 0.287073  
C 3.634729 0.854677 0.691239  
O 4.145902 1.613699 1.524527  
N 2.637289 1.369057 -0.128089  
H 1.872965 -0.784518 -1.381329  
C 2.788762 2.648143 -0.838984  
C 1.806573 2.617258 -2.027698  
C 2.342006 3.763366 0.148497  
C 4.224462 2.906733 -1.330720  
H 2.064617 1.828471 -2.740483  
H 0.782047 2.448209 -1.683338  
H 1.842008 3.578141 -2.552282  
H 3.034177 3.827064 0.989703  
H 2.327509 4.719043 -0.388067  
H 1.336637 3.557745 0.527323  
H 4.265962 3.866859 -1.855984  
H 4.931156 2.940726 -0.498080  
H 4.543808 2.127128 -2.032082

C 3.949188 -0.605628 0.661457  
C 4.641995 -1.077706 1.790662  
C 3.636389 -1.489295 -0.404338  
C 5.016179 -2.411120 1.903695  
H 4.874503 -0.368919 2.577911  
C 4.033644 -2.827145 -0.266990  
C 4.706531 -3.289365 0.864601  
H 5.541597 -2.759894 2.788000  
H 3.815737 -3.528357 -1.064455  
H 4.991537 -4.336320 0.928407  
C 2.905543 -1.029887 -1.655109  
C 2.866535 -2.018224 -2.826808  
H 2.315270 -2.929570 -2.571236  
H 2.348753 -1.553228 -3.671785  
H 3.871560 -2.305695 -3.157796  
F -0.261294 -1.319259 -0.633503  
H 3.362218 -0.096920 -2.008459

TS2 (T)

C 4.353646 2.951032 -1.195274  
N 3.830137 2.514816 -2.397020  
H 4.060113 2.872602 -3.314216  
C 2.936069 1.536738 -2.143591  
H 2.347584 1.037199 -2.898052  
N 2.859029 1.323181 -0.835446  
C 3.737121 2.202760 -0.231531  
H 3.840567 2.237150 0.840675  
C 4.876687 -2.738911 1.390470  
N 4.931806 -1.779973 2.382279  
H 5.537316 -1.791372 3.191631  
C 4.016253 -0.825182 2.093117  
H 3.840079 0.043472 2.708649  
N 3.381013 -1.116477 0.968821  
C 3.908474 -2.312005 0.521233  
H 3.541783 -2.767877 -0.384447  
C 1.550380 -2.623385 -3.356483  
H 1.155544 -2.550929 -4.371522  
H 1.091540 -3.479720 -2.849817  
C 1.245063 -1.357287 -2.571131  
O 1.802276 -1.296246 -1.411211  
O 0.504926 -0.479072 -3.067755  
Fe 1.610659 -0.009632 0.087344  
N 1.584290 1.177627 1.629382  
N 0.956534 0.842572 2.617518  
N 0.384921 0.607227 3.590223  
O 0.002718 1.060840 -0.981527  
H 0.031185 0.555698 -1.846410  
H -0.898361 0.938427 -0.605789  
H 5.511497 -3.611077 1.399189  
H 2.630224 -2.800902 -3.386539  
H 5.093512 3.733640 -1.139937  
C -3.718940 0.550539 -0.775387  
O -4.362768 1.117605 -1.663531  
N -2.810471 1.211689 0.031074  
H -1.600036 -0.950056 1.771412  
C -2.960617 2.640919 0.414639  
C -1.933141 2.917538 1.526217  
C -2.617078 3.510542 -0.817251

C -4.382830 2.949006 0.917852  
H -2.139987 2.320260 2.421100  
H -0.917024 2.691354 1.187622  
H -1.974325 3.974403 1.810766  
H -3.340666 3.348361 -1.617505  
H -2.631582 4.567702 -0.526282  
H -1.617305 3.265620 -1.188724  
H -4.460135 4.005759 1.197651  
H -5.126167 2.742966 0.143678  
H -4.621555 2.348070 1.803164  
C -3.827009 -0.932033 -0.557128  
C -4.471299 -1.692110 -1.543241  
C -3.338042 -1.553107 0.609657  
C -4.620596 -3.066750 -1.389206  
H -4.847238 -1.180822 -2.423458  
C -3.496737 -2.938802 0.753212  
C -4.129960 -3.690180 -0.236853  
H -5.114092 -3.651875 -2.160031  
H -3.118324 -3.429397 1.646206  
H -4.241492 -4.763640 -0.108645  
C -2.668142 -0.731923 1.674482  
C -3.396544 -0.591597 2.998191  
H -3.481950 -1.571679 3.489948  
H -2.848856 0.068880 3.678096  
H -4.413142 -0.204596 2.864746  
F 0.408962 -1.117750 0.878496  
H -2.621084 0.388084 1.081828

TS2 (Q)

C -4.521280 2.917654 1.024710  
N -3.927677 2.623345 2.236471  
H -4.141740 3.052027 3.126589  
C -2.990920 1.670672 2.027811  
H -2.356632 1.265648 2.802435  
N -2.952223 1.336330 0.746014  
C -3.902294 2.110428 0.109209  
H -4.057443 2.038380 -0.955760  
C -4.851325 -2.787526 -1.227868  
N -4.815686 -1.955773 -2.329921  
H -5.400598 -2.027018 -3.151453  
C -3.848836 -1.032693 -2.131307  
H -3.598777 -0.255076 -2.835818  
N -3.264654 -1.225768 -0.957030  
C -3.881001 -2.321687 -0.382996  
H -3.567931 -2.681343 0.583678  
C -1.532149 -2.455573 3.566507  
H -1.071585 -2.335196 4.548690  
H -1.145320 -3.363547 3.090749  
C -1.234620 -1.259023 2.678380  
O -1.795481 -1.271975 1.520647  
O -0.489509 -0.342830 3.100878  
Fe -1.542671 -0.118611 -0.178587  
N -1.552651 1.103972 -1.797062  
N -0.855008 0.930463 -2.770792  
N -0.208934 0.812185 -3.723380  
O -0.066497 0.983926 0.890081  
H -0.095390 0.557085 1.806547  
H 0.860254 0.912099 0.555692

H -5.543160 -3.611615 -1.152550  
H -2.614632 -2.581230 3.676122  
H -5.303367 3.654529 0.931224  
C 3.617350 0.543938 0.854242  
O 4.201291 1.091377 1.793345  
N 2.736509 1.219152 0.023725  
H 1.667104 -0.909775 -1.847927  
C 2.894480 2.662117 -0.309579  
C 1.921674 2.965291 -1.462308  
C 2.484245 3.494028 0.927866  
C 4.337660 2.993504 -0.731520  
H 2.172266 2.392930 -2.361991  
H 0.891226 2.728186 -1.179367  
H 1.972113 4.029587 -1.715763  
H 3.165725 3.310997 1.759814  
H 2.509728 4.559041 0.668195  
H 1.466998 3.238003 1.240016  
H 4.419369 4.057988 -0.978595  
H 5.043129 2.772645 0.073438  
H 4.626185 2.419138 -1.619551  
C 3.770283 -0.926111 0.588305  
C 4.380562 -1.709077 1.578499  
C 3.358667 -1.512596 -0.625166  
C 4.571589 -3.072842 1.381091  
H 4.697285 -1.224326 2.496185  
C 3.559305 -2.887589 -0.812215  
C 4.158061 -3.662020 0.181348  
H 5.038151 -3.676098 2.154660  
H 3.240533 -3.351648 -1.741888  
H 4.302909 -4.726833 0.019047  
C 2.722940 -0.667911 -1.692420  
C 3.509115 -0.462585 -2.973501  
H 3.641719 -1.422205 -3.494350  
H 2.977114 0.209032 -3.654781  
H 4.508460 -0.057599 -2.778049  
F -0.319192 -1.279382 -0.912297  
H 2.621286 0.430801 -1.061606

[ 5 + 7 ] (Int. Complex, T)

C -3.649499 3.730405 0.211829  
N -4.185458 3.038076 1.280796  
H -4.869429 3.388880 1.937479  
C -3.631489 1.808673 1.313222  
H -3.859944 1.047866 2.041319  
N -2.767505 1.675860 0.314669  
C -2.767865 2.870117 -0.381330  
H -2.135469 3.006265 -1.243498  
C -5.205621 -2.097110 -1.757289  
N -4.712048 -1.452790 -2.874339  
H -5.080370 -1.518665 -3.813265  
C -3.633113 -0.725544 -2.496782  
H -3.041048 -0.125593 -3.170936  
N -3.411148 -0.865764 -1.200233  
C -4.385010 -1.722202 -0.726658  
H -4.412205 -2.004553 0.314219  
C -2.529599 -2.326236 3.369721  
H -2.029433 -2.530020 4.318269  
H -2.566494 -3.247776 2.777146

C -1.775415 -1.267175 2.584069  
O -2.424433 -0.791177 1.562921  
O -0.637648 -0.915270 2.941772  
Fe -1.661828 -0.005714 -0.064773  
N -0.985659 0.864259 -1.688248  
N 0.073714 0.482292 -2.139754  
N 1.078457 0.176396 -2.621516  
O -0.021614 0.907742 1.160499  
H -0.103046 0.248481 1.917283  
H 0.852071 0.744552 0.758833  
H -6.066426 -2.745842 -1.802002  
H -3.561790 -2.009910 3.548996  
H -3.935269 4.744552 -0.018070  
C 3.705662 0.186670 0.748300  
O 4.402523 0.526053 1.707069  
N 3.063552 1.080159 -0.071365  
H 2.641202 0.699758 -0.915273  
C 3.243375 2.561568 -0.025745  
C 2.340933 3.147839 -1.123174  
C 2.798951 3.099493 1.347924  
C 4.710304 2.946602 -0.296657  
H 2.608832 2.759140 -2.112479  
H 1.285766 2.919458 -0.934615  
H 2.451468 4.236845 -1.146921  
H 3.433463 2.701537 2.141898  
H 2.869716 4.193331 1.354480  
H 1.761017 2.819115 1.554245  
H 4.823292 4.035442 -0.240857  
H 5.371998 2.492789 0.445006  
H 5.024334 2.624618 -1.295137  
C 3.378268 -1.267567 0.497959  
C 2.717556 -1.902500 1.552876  
C 3.650728 -1.988837 -0.714774  
C 2.234498 -3.207817 1.439613  
H 2.549096 -1.344896 2.469634  
C 3.106778 -3.309436 -0.807479  
C 2.417378 -3.902235 0.234551  
H 1.703374 -3.664484 2.268937  
H 3.277931 -3.865668 -1.725763  
H 2.030168 -4.911281 0.121129  
C 4.460675 -1.546732 -1.789817  
C 5.377109 -0.367796 -1.848109  
H 5.660707 0.001321 -0.858922  
H 6.296619 -0.638908 -2.382519  
H 4.936958 0.475490 -2.402652  
F -0.687899 -1.480001 -0.391977  
H 4.465949 -2.192565 -2.665759

[ 5 + 7 ] (Int. Complex, Q)

C -4.098954 3.418765 -0.623518  
N -3.858206 3.440853 0.736098  
H -4.177808 4.144313 1.387945  
C -3.104554 2.362799 1.049036  
H -2.749271 2.143405 2.044654  
N -2.848550 1.649046 -0.037722  
C -3.462474 2.300580 -1.089574  
H -3.389747 1.924968 -2.098165  
C -4.955609 -2.616296 -1.366451

N -4.416707 -2.252491 -2.585344  
H -4.743893 -2.548130 -3.495142  
C -3.361148 -1.441548 -2.357085  
H -2.744081 -1.008343 -3.128722  
N -3.197104 -1.262285 -1.053250  
C -4.185936 -1.993684 -0.422214  
H -4.250971 -2.014522 0.653682  
C -2.784483 -1.244526 3.963197  
H -2.494193 -0.915157 4.962343  
H -2.533304 -2.304085 3.841465  
C -2.066380 -0.436281 2.896965  
O -2.415313 -0.679130 1.682462  
O -1.201098 0.406795 3.234911  
Fe -1.573149 -0.168229 -0.127824  
N -0.946117 0.512565 -1.942445  
N 0.138858 0.217039 -2.383246  
N 1.178186 -0.028874 -2.833132  
O -0.154326 1.051738 0.950479  
H -0.432443 0.865286 1.911596  
H 0.747703 0.698828 0.836037  
H -5.810790 -3.268885 -1.288327  
H -3.868419 -1.150633 3.839526  
H -4.682039 4.180377 -1.116694  
C 3.740303 0.290944 0.745824  
O 4.469715 0.759651 1.624009  
N 3.030620 1.066437 -0.134154  
H 2.585526 0.586571 -0.912187  
C 3.160086 2.548094 -0.256109  
C 2.200549 2.985735 -1.373840  
C 2.740780 3.217745 1.066719  
C 4.603763 2.943590 -0.621857  
H 2.453374 2.511896 -2.328937  
H 1.164200 2.731933 -1.125070  
H 2.262519 4.070869 -1.506491  
H 3.394542 2.907165 1.883669  
H 2.799994 4.307349 0.962480  
H 1.708383 2.952902 1.317693  
H 4.682114 4.034454 -0.695130  
H 5.304817 2.596511 0.140701  
H 4.893730 2.517904 -1.588434  
C 3.452183 -1.190780 0.690152  
C 3.010219 -1.734982 1.900213  
C 3.542032 -2.024764 -0.477287  
C 2.563419 -3.053961 1.995791  
H 2.994233 -1.092499 2.775852  
C 3.030888 -3.355974 -0.351884  
C 2.556825 -3.858623 0.846040  
H 2.209912 -3.442600 2.946110  
H 3.061275 -3.996072 -1.230039  
H 2.192062 -4.881030 0.896329  
C 4.160938 -1.686432 -1.706221  
C 5.061961 -0.535347 -2.016307  
H 5.475505 -0.062411 -1.121697  
H 5.901568 -0.880820 -2.633575  
H 4.552399 0.245369 -2.601586  
F -0.401987 -1.572345 -0.105485  
H 4.027717 -2.408629 -2.509179

C 4.148753 -1.703604 -2.997060  
N 3.948985 -2.790186 -2.167410  
H 4.280990 -3.731655 -2.324888  
C 3.218760 -2.383909 -1.104940  
H 2.892799 -3.031555 -0.305376  
N 2.938430 -1.093318 -1.211587  
C 3.510999 -0.656750 -2.389244  
H 3.416844 0.368975 -2.708278  
C 5.301462 2.555492 1.221320  
N 4.753855 3.300384 0.195697  
H 5.077380 4.201346 -0.128043  
C 3.686093 2.617629 -0.288685  
H 3.066326 2.979411 -1.095310  
N 3.521087 1.479826 0.363673  
C 4.523745 1.430854 1.311065  
H 4.592445 0.593731 1.987633  
C 3.217873 -2.364352 3.508113  
H 3.035981 -3.375859 3.877417  
H 2.934163 -1.643001 4.282899  
C 2.402737 -2.092710 2.248525  
O 2.688845 -0.998103 1.645340  
O 1.536902 -2.926887 1.890757  
Fe 1.789994 -0.040859 0.127704  
N 1.047793 0.980816 -1.314100  
N 0.239879 1.860821 -1.235550  
N -0.540398 2.745149 -1.250343  
O 0.326568 -1.710883 -0.115858  
H 0.613913 -2.246198 0.677923  
H -0.548390 -1.321697 0.084579  
H 6.164711 2.890088 1.775409  
H 4.285748 -2.226518 3.309457  
H 4.708994 -1.776298 -3.915745  
C -3.410473 -0.240251 0.080487  
O -2.261461 -0.692456 0.020091  
N -4.518913 -1.016338 -0.022355  
H -5.409182 -0.537295 0.002742  
C -4.558219 -2.497460 -0.140941  
C -6.045060 -2.879840 -0.211044  
C -3.840577 -2.946103 -1.427590  
C -3.908281 -3.140419 1.098213  
H -6.579146 -2.561900 0.692589  
H -6.530816 -2.423482 -1.082073  
H -6.148048 -3.965752 -0.298265  
H -2.785805 -2.664576 -1.401915  
H -3.909536 -4.034851 -1.531006  
H -4.305635 -2.488452 -2.308223  
H -3.960550 -4.232294 1.022616  
H -2.858954 -2.849166 1.183114  
H -4.431213 -2.834224 2.011188  
C -3.692569 1.220238 0.331538  
C -4.445310 1.510603 1.478528  
C -3.207816 2.285697 -0.482802  
C -4.714331 2.821452 1.870471  
H -4.803215 0.687079 2.090175  
C -3.511268 3.605397 -0.062762  
C -4.237287 3.876822 1.088119  
H -5.284947 3.013447 2.774251  
H -3.154883 4.429866 -0.674564  
H -4.436756 4.906271 1.372257

TS3-N3 (T)

C -2.467551 2.176646 -1.731550  
F 0.735590 0.843693 1.313944  
H -2.525423 3.087840 -2.318173  
C -2.284305 0.935229 -2.551721  
H -1.643608 0.198973 -2.058970  
H -3.249861 0.441031 -2.732921  
H -1.850594 1.188393 -3.523350

TS3-N3 (Q)

C 4.066358 -2.081070 -2.924662  
N 3.789371 -3.091992 -2.025259  
H 4.072276 -4.058757 -2.106458  
C 3.061717 -2.565580 -1.011199  
H 2.697572 -3.133035 -0.166463  
N 2.857384 -1.272841 -1.210604  
C 3.478669 -0.959734 -2.402731  
H 3.451876 0.043310 -2.799983  
C 5.265908 2.511837 0.908587  
N 4.713246 3.196882 -0.155825  
H 5.066050 4.051068 -0.564665  
C 3.601435 2.530966 -0.549366  
H 2.967517 2.852223 -1.361540  
N 3.413122 1.456787 0.200622  
C 4.446240 1.435065 1.117395  
H 4.501488 0.650304 1.854826  
C 3.201514 -2.324602 3.604359  
H 2.993526 -3.324833 3.990239  
H 2.939232 -1.581154 4.365511  
C 2.404059 -2.047853 2.334677  
O 2.646961 -0.934456 1.755720  
O 1.578121 -2.911034 1.936493  
Fe 1.669125 0.074514 0.156192  
N 0.926650 0.917805 -1.583387  
N 0.138688 1.799603 -1.729211  
N -0.643657 2.658839 -1.917665  
O 0.213942 -1.539232 0.136995  
H 0.614780 -2.152665 0.825442  
H -0.633471 -1.213314 0.513978  
H 6.162623 2.849298 1.404326  
H 4.273655 -2.219948 3.405434  
H 4.637330 -2.251574 -3.823883  
C -3.267941 -0.278384 0.477573  
O -2.374305 -0.978403 0.974376  
N -4.372916 -0.793395 -0.111860  
H -5.086465 -0.129700 -0.384657  
C -4.725387 -2.235401 -0.228109  
C -6.062966 -2.288057 -0.983108  
C -3.643967 -2.986727 -1.025596  
C -4.888856 -2.845941 1.176549  
H -6.849911 -1.753340 -0.436843  
H -5.971627 -1.847368 -1.983007  
H -6.384025 -3.327574 -1.100380  
H -2.671233 -2.911451 -0.535333  
H -3.915003 -4.045490 -1.103839  
H -3.556736 -2.582210 -2.039789  
H -5.180038 -3.899122 1.094665  
H -3.951619 -2.786792 1.734535  
H -5.667081 -2.318045 1.739372

C -3.258215 1.229307 0.594856  
C -3.460688 1.711781 1.891727  
C -3.132655 2.144933 -0.492986  
C -3.599352 3.075823 2.148085  
H -3.528983 0.998604 2.708062  
C -3.307082 3.526040 -0.200880  
C -3.538607 3.985519 1.085256  
H -3.762789 3.423223 3.163779  
H -3.216170 4.236497 -1.017773  
H -3.657249 5.049791 1.267339  
C -2.756184 1.821198 -1.843037  
F 0.641537 1.147374 1.257730  
H -2.956822 2.603710 -2.566782  
C -2.481458 0.470510 -2.414767  
H -1.850635 -0.144620 -1.764312  
H -3.413799 -0.086386 -2.581967  
H -1.981557 0.571010 -3.382472

TS3-N1 (T)

C -4.366730 -1.569045 2.618385  
N -3.280432 -2.391754 2.835549  
H -3.216509 -3.127452 3.525509  
C -2.304414 -2.044921 1.967800  
H -1.339200 -2.520067 1.900398  
N -2.708947 -1.040018 1.201079  
C -3.996793 -0.733179 1.600906  
H -4.560154 0.056555 1.131088  
C -4.675965 2.308257 -1.594762  
N -3.800882 3.211144 -1.024077  
H -3.904501 4.216260 -1.010107  
C -2.766115 2.520078 -0.493613  
H -1.919087 2.968331 0.001014  
N -2.936931 1.221824 -0.687500  
C -4.123966 1.073815 -1.381261  
H -4.458982 0.096497 -1.689749  
C -2.911007 -3.214168 -3.379308  
H -2.486367 -4.173539 -3.683615  
H -2.888927 -2.528535 -4.234940  
C -2.117783 -2.601412 -2.227845  
O -2.642760 -1.595856 -1.648797  
O -1.002520 -3.117069 -1.936272  
Fe -1.558245 -0.238793 -0.283951  
N -0.557751 1.065545 1.280376  
N -1.129643 1.221953 2.340041  
N -1.644292 1.392568 3.365306  
O -0.189004 -1.685260 0.038263  
H -0.401388 -2.302206 -0.759111  
H 0.700165 -1.288300 -0.116271  
H -5.581212 2.620005 -2.091368  
H -3.959653 -3.344358 -3.092987  
H -5.275283 -1.649577 3.193858  
C 3.297649 -0.031898 -0.093383  
O 2.472522 -0.954130 -0.011361  
N 4.635430 -0.242560 -0.039872  
H 5.221396 0.581018 -0.072436  
C 5.330794 -1.554204 0.043686  
C 6.835060 -1.238902 0.042420  
C 4.947566 -2.273676 1.350046

C 4.973357 -2.416458 -1.180758  
H 7.130130 -0.716786 -0.875799  
H 7.110039 -0.615820 0.902117  
H 7.411137 -2.167321 0.101600  
H 3.876427 -2.484825 1.375451  
H 5.492687 -3.221163 1.426667  
H 5.205740 -1.658566 2.219554  
H 5.505590 -3.372946 -1.130215  
H 3.900320 -2.616734 -1.215882  
H 5.265250 -1.910128 -2.107610  
C 2.907728 1.407997 -0.316985  
C 3.416741 2.002957 -1.478903  
C 2.038073 2.154923 0.536522  
C 3.080860 3.305364 -1.849457  
H 4.068549 1.418766 -2.122440  
C 1.725807 3.480928 0.132712  
C 2.225025 4.048033 -1.029534  
H 3.479334 3.730085 -2.765863  
H 1.073768 4.068051 0.774543  
H 1.954711 5.065981 -1.296009  
C 1.469887 1.729396 1.792368  
F -0.514359 0.419713 -1.615328  
C 1.919431 0.582305 2.643681  
H 1.904152 -0.366895 2.108063  
H 2.949644 0.752027 2.995588  
H 1.283866 0.502629 3.530839  
H 1.028963 2.550696 2.351513

#### TS3-N1 (Q)

C -4.124803 -2.251503 2.568510  
N -2.975906 -3.016426 2.580268  
H -2.821429 -3.854826 3.122866  
C -2.084946 -2.449464 1.731887  
H -1.099059 -2.837586 1.529484  
N -2.598214 -1.362824 1.175691  
C -3.872361 -1.229485 1.692814  
H -4.514959 -0.414958 1.396785  
C -5.247130 2.125932 -1.082279  
N -4.525762 3.039361 -0.338428  
H -4.811063 3.981118 -0.108133  
C -3.355760 2.457342 0.018095  
H -2.587956 2.952398 0.592729  
N -3.288261 1.222241 -0.451610  
C -4.463218 1.004689 -1.146114  
H -4.634440 0.065156 -1.647349  
C -2.916877 -2.634414 -3.746172  
H -2.457729 -3.449387 -4.309768  
H -3.080515 -1.779704 -4.412383  
C -2.032281 -2.204694 -2.579749  
O -2.525209 -1.303867 -1.814021  
O -0.906635 -2.746004 -2.444758  
Fe -1.500917 -0.118818 -0.385989  
N -0.682750 1.015674 1.263530  
N -1.179884 1.003394 2.369867  
N -1.615874 1.028098 3.442550  
O -0.022703 -1.661064 -0.240533  
H -0.224875 -2.137813 -1.112076  
H 0.883340 -1.281580 -0.303341

H -6.219784 2.356603 -1.487885  
H -3.898413 -2.949902 -3.375872  
H -4.986414 -2.497896 3.169076  
C 3.408637 0.017436 -0.117299  
O 2.640474 -0.956229 -0.142985  
N 4.751800 -0.112098 -0.010214  
H 5.283898 0.747185 0.031812  
C 5.527666 -1.381219 0.019725  
C 7.005395 -0.973559 0.127748  
C 5.123720 -2.218682 1.246903  
C 5.291894 -2.168514 -1.282122  
H 7.314339 -0.369071 -0.733527  
H 7.192111 -0.398922 1.043018  
H 7.637254 -1.866411 0.155907  
H 4.069650 -2.499241 1.194766  
H 5.726987 -3.132449 1.287173  
H 5.292852 -1.655473 2.171656  
H 5.882646 -3.091226 -1.270910  
H 4.237559 -2.431662 -1.391846  
H 5.597485 -1.576408 -2.151948  
C 2.934857 1.442761 -0.262325  
C 3.425689 2.134122 -1.376035  
C 2.019950 2.091147 0.624407  
C 3.027719 3.440066 -1.666689  
H 4.115999 1.627440 -2.044353  
C 1.647015 3.424760 0.303551  
C 2.128601 4.087646 -0.814000  
H 3.414301 3.941451 -2.548733  
H 0.955005 3.933465 0.969089  
H 1.809504 5.104917 -1.021114  
C 1.465090 1.566305 1.842423  
F -0.598502 0.901265 -1.641178  
C 1.871986 0.335776 2.585605  
H 1.884930 -0.553396 1.955546  
H 2.885825 0.464897 2.998495  
H 1.200094 0.169897 3.433045  
H 0.994701 2.327945 2.457563

#### TS4 (T)

C 4.886540 -2.313008 2.032938  
N 4.187080 -1.728196 3.070530  
H 4.396563 -1.812586 4.055514  
C 3.153113 -1.031159 2.540993  
H 2.430340 -0.476617 3.122005  
N 3.155853 -1.134645 1.221038  
C 4.231264 -1.933989 0.892041  
H 4.442053 -2.186918 -0.135290  
C 4.698459 1.654330 -2.247436  
N 4.490433 0.545699 -3.044088  
H 4.962921 0.336440 -3.912305  
C 3.535823 -0.219217 -2.464860  
H 3.163730 -1.151398 -2.858601  
N 3.124552 0.341289 -1.336930  
C 3.840700 1.513847 -1.189990  
H 3.664404 2.158836 -0.345012  
C 1.305396 3.231129 2.358433  
H 1.052220 3.384394 3.409819  
H 0.602928 3.802013 1.739613

C 1.197543 1.758168 1.984986  
O 1.750791 1.425594 0.879278  
O 0.581107 0.978803 2.756679  
Fe 1.673316 -0.350137 -0.119173  
N 1.700415 -2.070381 -1.159474  
N 0.664265 -2.652779 -1.373350  
N -0.298690 -3.254488 -1.617503  
O 0.224514 -1.017660 1.094090  
H 0.255655 -0.336163 1.833948  
H -0.661602 -0.906322 0.668427  
H 5.415344 2.419244 -2.501251  
H 2.310770 3.611245 2.153542  
H 5.756345 -2.928600 2.200877  
C -3.264786 -0.076408 0.086613  
O -2.415285 -0.955484 0.297583  
N -4.592106 -0.338454 0.022703  
H -5.194428 0.441261 -0.205457  
C -5.250765 -1.654064 0.239504  
C -6.759040 -1.404926 0.081804  
C -4.771035 -2.666497 -0.816834  
C -4.948041 -2.161964 1.661212  
H -7.120753 -0.679995 0.821083  
H -6.995893 -1.028685 -0.920927  
H -7.309115 -2.339332 0.228847  
H -3.693873 -2.829662 -0.740234  
H -5.281355 -3.625172 -0.670603  
H -5.000454 -2.307688 -1.826612  
H -5.457485 -3.117068 1.830920  
H -3.875035 -2.311033 1.799698  
H -5.303219 -1.445712 2.410842  
C -2.899391 1.378571 -0.053536  
C -3.463567 2.260093 0.876650  
C -1.953052 1.863890 -1.005834  
C -3.102376 3.607856 0.921731  
H -4.175823 1.873834 1.600561  
C -1.598534 3.234736 -0.925145  
C -2.155022 4.092804 0.013838  
H -3.547723 4.265550 1.662183  
H -0.876258 3.619844 -1.639994  
H -1.859685 5.138169 0.034285  
C -1.357980 1.103856 -2.078718  
F 0.296124 0.369976 -1.283446  
C -1.908952 -0.151104 -2.676587  
H -1.750079 -1.017418 -2.028418  
H -2.990955 -0.059859 -2.849976  
H -1.427011 -0.354574 -3.636386  
H -0.753295 1.709752 -2.743904

TS4 (Q)

C 4.649557 -1.542822 2.965559  
N 3.980377 -0.533128 3.629121  
H 4.161167 -0.214573 4.570877  
C 3.020660 -0.051721 2.802340  
H 2.337899 0.743646 3.064774  
N 3.040155 -0.694241 1.645149  
C 4.051799 -1.628400 1.736496  
H 4.268429 -2.297262 0.917943  
C 4.970907 0.387348 -2.730869

N 4.784505 -0.970260 -2.902065  
H 5.307791 -1.571699 -3.522961  
C 3.766144 -1.358651 -2.095816  
H 3.394075 -2.369474 -2.025109  
N 3.294205 -0.325994 -1.417128  
C 4.036600 0.771219 -1.805115  
H 3.829371 1.745921 -1.391675  
C 1.811119 3.953446 0.926396  
H 1.423696 4.579067 1.733038  
H 1.434579 4.323104 -0.033782  
C 1.389583 2.500581 1.109507  
O 1.840798 1.678776 0.235752  
O 0.650280 2.196571 2.079036  
Fe 1.551794 -0.381033 -0.021030  
N 1.446718 -2.443986 -0.209069  
N 0.504994 -3.053355 -0.649489  
N -0.379424 -3.684698 -1.062193  
O 0.035769 -0.305852 1.471612  
H 0.114361 0.642701 1.789492  
H -0.873061 -0.436117 1.102784  
H 5.727939 0.935333 -3.269859  
H 2.903915 4.024717 0.895903  
H 5.461292 -2.089581 3.419250  
C -3.309479 -0.030203 0.137914  
O -2.493160 -0.850026 0.590975  
N -4.637038 -0.270872 0.072743  
H -5.204418 0.449112 -0.355266  
C -5.345748 -1.487288 0.557509  
C -6.836995 -1.252153 0.271074  
C -4.850680 -2.727949 -0.208159  
C -5.119787 -1.652145 2.071349  
H -7.207867 -0.365596 0.799613  
H -7.018772 -1.120604 -0.802480  
H -7.421017 -2.113958 0.607711  
H -3.783777 -2.892441 -0.041503  
H -5.397381 -3.614477 0.132188  
H -5.023610 -2.612401 -1.284005  
H -5.664699 -2.530767 2.433898  
H -4.058715 -1.785911 2.292545  
H -5.485226 -0.773526 2.614920  
C -2.879133 1.339740 -0.317820  
C -3.375639 2.426222 0.408438  
C -1.929331 1.559054 -1.364559  
C -2.939663 3.730722 0.162662  
H -4.095103 2.243540 1.201858  
C -1.499198 2.896116 -1.579567  
C -1.986676 3.960477 -0.835278  
H -3.333537 4.553842 0.751046  
H -0.774918 3.079568 -2.368369  
H -1.634335 4.968241 -1.035330  
C -1.425529 0.570947 -2.274799  
F 0.422465 -0.062570 -1.557758  
C -1.993632 -0.784992 -2.525318  
H -1.856692 -1.454879 -1.672846  
H -3.073740 -0.720494 -2.724642  
H -1.512991 -1.240718 -3.393525  
H -0.833680 0.988374 -3.080044

[ 8 + 1N ] (Prod. Complex, T)

C 3.757959 -1.062680 -3.479698  
N 3.678964 -2.266930 -2.808349  
H 3.965692 -3.168489 -3.164197  
C 3.148280 -2.038223 -1.585543  
H 2.959082 -2.802422 -0.844266  
N 2.885593 -0.746960 -1.432767  
C 3.261600 -0.128193 -2.611198  
H 3.148078 0.936486 -2.747412  
C 4.923193 3.065020 0.266222  
N 3.841371 3.663988 0.880258  
H 3.813718 4.598568 1.262982  
C 2.819255 2.777399 0.898367  
H 1.847195 2.947551 1.331704  
N 3.186676 1.641120 0.321676  
C 4.501290 1.808021 -0.074334  
H 5.044546 1.017054 -0.567092  
C 3.952599 -2.974873 2.971362  
H 3.807414 -4.052308 3.078525  
H 3.748989 -2.487310 3.931702  
C 3.028161 -2.392738 1.903480  
O 3.184549 -1.162810 1.627409  
O 2.177814 -3.163966 1.366365  
Fe 1.967768 0.040485 0.254345  
N -0.100447 2.407823 -1.944479  
N -1.232856 2.311128 -2.059503  
N -2.443068 2.324639 -2.301720  
O 0.609832 -1.473517 0.125824  
H 1.101290 -2.210022 0.617996  
H -0.166681 -1.226529 0.673986  
H 5.865871 3.572608 0.135582  
H 4.997866 -2.765317 2.719435  
H 4.146680 -0.987129 -4.482940  
C -2.920527 -0.658614 0.792459  
O -1.946838 -1.245468 1.282517  
N -3.894142 -1.292699 0.090846  
H -4.722302 -0.751758 -0.120582  
C -3.959573 -2.748803 -0.209158  
C -5.263805 -2.966156 -0.992537  
C -2.754456 -3.153361 -1.077818  
C -3.992589 -3.561577 1.098800  
H -6.139237 -2.683591 -0.394765  
H -5.270951 -2.382406 -1.920771  
H -5.366876 -4.022795 -1.257710  
H -1.811767 -2.943432 -0.568030  
H -2.800917 -4.225535 -1.299316  
H -2.765260 -2.607387 -2.028160  
H -4.078391 -4.629876 0.870552  
H -3.081197 -3.399663 1.677708  
H -4.854224 -3.272231 1.711282  
C -3.122135 0.823985 1.003921  
C -3.066473 1.258140 2.337954  
C -3.324564 1.762124 -0.029072  
C -3.260900 2.596272 2.664293  
H -2.868521 0.526042 3.114355  
C -3.505888 3.110094 0.317837  
C -3.488499 3.526353 1.646592  
H -3.226394 2.913151 3.702593  
H -3.635742 3.842795 -0.473611  
H -3.635641 4.575942 1.885768

C -3.302857 1.386743 -1.510393  
C -4.686310 1.452913 -2.165637  
H -5.105011 2.460895 -2.084497  
H -4.617522 1.187903 -3.225185  
H -5.377692 0.758555 -1.678203  
F 0.743994 0.959109 1.302647  
H -2.900073 0.376311 -1.628276

[ 8 + 1N ] (Prod. Complex, Q)

C 5.583192 -1.038814 -2.661680  
N 5.191061 -2.285639 -2.217428  
H 5.636512 -3.165364 -2.438604  
C 4.094263 -2.129782 -1.437025  
H 3.571918 -2.939166 -0.946526  
N 3.764244 -0.849306 -1.352818  
C 4.688145 -0.158978 -2.113512  
H 4.638852 0.914960 -2.214800  
C 4.396869 2.759949 2.272886  
N 3.865262 3.591361 1.306595  
H 4.004743 4.589624 1.235399  
C 3.116935 2.832575 0.466993  
H 2.570877 3.211772 -0.382953  
N 3.140773 1.563301 0.840384  
C 3.935771 1.505688 1.967598  
H 4.107811 0.570300 2.477958  
C 2.389549 -2.930976 2.985640  
H 2.266621 -4.014505 3.040488  
H 1.731655 -2.445764 3.714343  
C 2.085200 -2.415293 1.583573  
O 2.094071 -1.137167 1.450385  
O 1.860704 -3.240847 0.665599  
Fe 2.027222 -0.022988 -0.303158  
N -2.399978 2.412438 -3.460936  
N -3.144999 2.531287 -2.603906  
N -3.997026 2.789529 -1.746918  
O 0.758308 -1.616142 -1.176851  
H 1.086367 -2.351441 -0.590404  
H -0.176755 -1.476062 -0.906949  
H 5.032374 3.129630 3.062579  
H 3.419346 -2.670135 3.256797  
H 6.435219 -0.900395 -3.308610  
C -2.714388 -0.808065 0.246904  
O -1.903370 -1.577380 -0.288069  
N -3.994872 -1.164396 0.516846  
H -4.525925 -0.525040 1.093220  
C -4.619985 -2.488676 0.251271  
C -6.077150 -2.376048 0.726308  
C -4.583607 -2.789530 -1.257782  
C -3.889630 -3.586948 1.046850  
H -6.129795 -2.158386 1.800236  
H -6.611892 -1.587741 0.183301  
H -6.599851 -3.321300 0.551358  
H -3.555104 -2.837471 -1.620963  
H -5.069185 -3.751750 -1.454371  
H -5.118872 -2.015277 -1.818967  
H -4.367805 -4.556786 0.869494  
H -2.842914 -3.653562 0.741957  
H -3.929824 -3.377213 2.121796



C -2.310345 0.580010 0.681760  
C -1.172503 0.658257 1.501903  
C -2.971115 1.761715 0.286835  
C -0.708219 1.885317 1.965852  
H -0.649432 -0.254948 1.768871  
C -2.480481 2.990526 0.755117  
C -1.369812 3.057699 1.591747  
H 0.170234 1.925559 2.602830  
H -2.965924 3.906364 0.430571  
H -1.013544 4.023286 1.939906  
C -4.170762 1.773234 -0.660532  
C -5.480233 2.143438 0.043747  
H -5.409142 3.138658 0.493650  
H -6.308880 2.142638 -0.671004  
H -5.706545 1.427599 0.840302  
F 1.331697 1.325603 -1.390096  
H -4.283306 0.789638 -1.125882

[ 4 + 1F ] (Prod. Complex, T)

C -5.510026 -0.876972 -2.007815  
N -5.022159 0.230316 -2.672522  
H -5.476746 0.718997 -3.431291  
C -3.811312 0.536888 -2.142772  
H -3.196794 1.362389 -2.472448  
N -3.497458 -0.307774 -1.173404  
C -4.551300 -1.195163 -1.081984  
H -4.540366 -2.002401 -0.364638  
C -3.228638 -0.222916 3.851203  
N -2.971442 -1.572641 3.709778  
H -3.157890 -2.292215 4.394240  
C -2.418709 -1.773192 2.491052  
H -2.107583 -2.728729 2.099428  
N -2.307978 -0.622244 1.841107  
C -2.810741 0.354588 2.682750  
H -2.815649 1.388463 2.378547  
C -1.628513 3.971365 0.090420  
H -1.306598 4.744749 -0.609790  
H -1.103033 4.085752 1.043084  
C -1.390158 2.581843 -0.487727  
O -1.477883 1.612970 0.352244  
O -1.159725 2.465621 -1.715352  
Fe -1.543741 -0.375487 -0.028968  
N -1.198195 -2.343315 -0.079939  
N -0.789818 -2.956052 -1.036750  
N -0.393433 -3.608031 -1.911777  
O -0.565902 -0.103746 -1.800464  
H -0.688966 0.882762 -1.924081  
H 0.405459 -0.263778 -1.701564  
H -3.671565 0.187942 4.744855  
H -2.699791 4.098689 0.289871  
H -6.462152 -1.321205 -2.253005  
C 2.898804 -0.145428 -0.715788  
O 2.110211 -0.690071 -1.500783  
N 3.936567 -0.787625 -0.137350  
H 4.566819 -0.217508 0.411115  
C 4.305372 -2.219610 -0.304150  
C 5.515641 -2.453528 0.613813  
C 3.136033 -3.121846 0.128497

C 4.692469 -2.491876 -1.769437  
H 6.357282 -1.806672 0.336012  
H 5.259428 -2.261985 1.662816  
H 5.850443 -3.492000 0.531937  
H 2.277046 -3.000836 -0.534415  
H 3.452638 -4.170609 0.098760  
H 2.824765 -2.882929 1.151013  
H 4.983686 -3.541320 -1.890211  
H 3.849474 -2.288167 -2.433711  
H 5.539254 -1.864311 -2.070427  
C 2.825369 1.338635 -0.417206  
C 3.391023 2.190453 -1.377935  
C 2.193862 1.887755 0.713318  
C 3.361781 3.574167 -1.217864  
H 3.858012 1.756231 -2.257840  
C 2.163794 3.282404 0.855514  
C 2.746987 4.122603 -0.090928  
H 3.808018 4.217580 -1.970492  
H 1.667676 3.714406 1.721833  
H 2.708822 5.199700 0.044616  
C 1.556098 1.060023 1.812332  
C 2.483403 0.765488 2.985627  
H 2.821114 1.699162 3.446886  
H 1.956244 0.173798 3.740889  
H 3.361712 0.205267 2.650290  
F 1.121225 -0.178812 1.293319  
H 0.651864 1.570025 2.156318

[ 4 + 1F ] (Prod. Complex, Q)

C 5.461406 -0.996760 2.061980  
N 4.966637 0.083641 2.764855  
H 5.420451 0.551660 3.537060  
C 3.752936 0.399809 2.252650  
H 3.134386 1.212236 2.606764  
N 3.444276 -0.415387 1.254680  
C 4.504476 -1.292180 1.127930  
H 4.497642 -2.073011 0.382416  
C 3.411327 -0.101045 -3.877342  
N 3.125470 -1.449615 -3.794789  
H 3.319005 -2.145914 -4.501167  
C 2.533966 -1.680612 -2.596739  
H 2.195712 -2.647401 -2.255812  
N 2.426643 -0.556149 -1.906585  
C 2.971088 0.437786 -2.696997  
H 2.991030 1.461020 -2.355548  
C 1.751625 3.993924 0.118427  
H 1.521928 4.760201 0.861451  
H 1.176106 4.175824 -0.794518  
C 1.455123 2.600449 0.660169  
O 1.509688 1.647824 -0.201238  
O 1.205345 2.462201 1.881205  
Fe 1.549380 -0.404288 0.137562  
N 1.149416 -2.414659 0.061004  
N 0.592864 -3.103783 0.878043  
N 0.061699 -3.809644 1.632392  
O 0.424236 -0.100113 1.985169  
H 0.603103 0.875159 2.093868  
H -0.544493 -0.200475 1.829261

H 3.886141 0.333556 -4.743205  
H 2.813557 4.060583 -0.147728  
H 6.417568 -1.441483 2.289180  
C -2.987288 -0.088154 0.646767  
O -2.263530 -0.609746 1.504480  
N -3.987040 -0.741538 0.013203  
H -4.566502 -0.183901 -0.600611  
C -4.406827 -2.154525 0.222966  
C -5.572178 -2.397028 -0.749540  
C -3.244559 -3.108609 -0.102985  
C -4.881966 -2.348772 1.674784  
H -6.410143 -1.718884 -0.545105  
H -5.255356 -2.256911 -1.790129  
H -5.938086 -3.422750 -0.643666  
H -2.411442 -2.977331 0.590502  
H -3.592015 -4.145550 -0.030781  
H -2.881548 -2.938317 -1.122580  
H -5.215837 -3.381866 1.822621  
H -4.070087 -2.143929 2.376273  
H -5.721658 -1.681479 1.901162  
C -2.879256 1.384822 0.301550  
C -3.577845 2.267017 1.139031  
C -2.094537 1.897801 -0.748054  
C -3.526233 3.644914 0.936101  
H -4.166130 1.862348 1.958297  
C -2.046097 3.286479 -0.933997  
C -2.757884 4.156920 -0.110217  
H -4.075812 4.311519 1.594281  
H -1.435332 3.689824 -1.738386  
H -2.701279 5.228704 -0.277447  
C -1.324063 1.036307 -1.728212  
C -2.133363 0.596034 -2.941086  
H -2.485474 1.470897 -3.497395  
H -1.512804 -0.013871 -3.605279  
H -3.001059 0.006764 -2.629922  
F -0.864139 -0.138395 -1.080296  
H -0.422984 1.570963 -2.037453

## XII. X-ray Crystallography and the Assignments of Absolute Configuration

For azidation product **1N**, 10 mg of pure compound was dissolved in 0.5 mL dichloromethane and Crystals of compound **1N** were obtained via slow evaporation of a dichloromethane solution of **1N** at room temperature. A suitable crystal was selected and mounted in a nylon loop in immersion oil.

All reflection intensities were measured at 110(2) K using a SuperNova diffractometer (equipped with Atlas detector) with Cu  $K\alpha$  radiation ( $\lambda = 1.54178 \text{ \AA}$ ) under the program CrysAlisPro (Version CrysAlisPro 1.171.39.29c, Rigaku OD, 2017). The same program was used to refine the cell dimensions and for data reduction. The structure was solved with the program SHELXS-2018/3 and was refined on  $F^2$  with SHELXL-2018/3 (38). Analytical numeric absorption correction using a multifaceted crystal model was applied using CrysAlisPro. The temperature of the data collection was controlled using the system Cryojet (manufactured by Oxford Instruments). The H atoms were placed at calculated positions (unless otherwise specified) using the instructions AFIX 13, AFIX 43 or AFIX 137 with isotropic displacement parameters having values 1.2 or 1.5  $U_{eq}$  of the attached C atoms. The H atoms attached to N1X (X = A, B, C, D) were found from difference Fourier maps, and their coordinates were refined pseudofreely using the DFIX instruction in order to keep the N-H bond distances within an acceptable range.

The asymmetric unit contains four crystallographically independent molecules, and the structure is mostly ordered. The fragment C12D @ N4D of molecule D is slightly disordered over two orientations, and the occupancy factor of the major component (major component: C12D has the S configuration; minor component: C12 has the R configuration) refines to 0.911(4). This observation is consistent with what has been observed from chiral HPLC which shows an enantiomeric ratio of 93:7 (almost pure). Computer programs: CrysAlis PRO 1.171.39.29c (Rigaku OD, 2017), SHELXS 2018/3 (Sheldrick, 2018), SHELXL 2018/3 (Sheldrick, 2018), SHELXTL v6.10 (Sheldrick, 2008).

The absolute configuration has been established by anomalous dispersion effects in diffraction measurements on the crystal, and the Flack and Hooft parameters refine to -0.06(6) and -0.05(6), respectfully.

|                                           |               |          |
|-------------------------------------------|---------------|----------|
| 791_ALERT_4_G Model has Chirality at C12A | (Sohnke SpGr) | S Verify |
| 791_ALERT_4_G Model has Chirality at C12B | (Sohnke SpGr) | S Verify |
| 791_ALERT_4_G Model has Chirality at C12C | (Sohnke SpGr) | S Verify |
| 791_ALERT_4_G Model has Chirality at C12D | (Sohnke SpGr) | S Verify |

|                                                                            |                                                                                                                                                                                                                                                                                                                                                                                                         |
|----------------------------------------------------------------------------|---------------------------------------------------------------------------------------------------------------------------------------------------------------------------------------------------------------------------------------------------------------------------------------------------------------------------------------------------------------------------------------------------------|
|                                                                            | xs2607a                                                                                                                                                                                                                                                                                                                                                                                                 |
| Crystal data                                                               |                                                                                                                                                                                                                                                                                                                                                                                                         |
| Chemical formula                                                           | C <sub>13</sub> H <sub>18</sub> N <sub>4</sub> O                                                                                                                                                                                                                                                                                                                                                        |
| $M_r$                                                                      | 246.31                                                                                                                                                                                                                                                                                                                                                                                                  |
| Crystal system, space group                                                | Triclinic, <i>P</i> 1                                                                                                                                                                                                                                                                                                                                                                                   |
| Temperature (K)                                                            | 110                                                                                                                                                                                                                                                                                                                                                                                                     |
| $a, b, c$ (Å)                                                              | 9.61890 (17), 10.20786 (19), 15.2906 (2)                                                                                                                                                                                                                                                                                                                                                                |
| $\alpha, \beta, \gamma$ (°)                                                | 102.6118 (14), 99.7985 (14), 106.3256 (16)                                                                                                                                                                                                                                                                                                                                                              |
| $V$ (Å <sup>3</sup> )                                                      | 1362.40 (4)                                                                                                                                                                                                                                                                                                                                                                                             |
| $Z$                                                                        | 4                                                                                                                                                                                                                                                                                                                                                                                                       |
| Radiation type                                                             | Cu $K\alpha$                                                                                                                                                                                                                                                                                                                                                                                            |
| $\mu$ (mm <sup>-1</sup> )                                                  | 0.64                                                                                                                                                                                                                                                                                                                                                                                                    |
| Crystal size (mm)                                                          | 0.32 × 0.12 × 0.06                                                                                                                                                                                                                                                                                                                                                                                      |
| Data collection                                                            |                                                                                                                                                                                                                                                                                                                                                                                                         |
| Diffractometer                                                             | SuperNova, Dual, Cu at zero, Atlas                                                                                                                                                                                                                                                                                                                                                                      |
| Absorption correction                                                      | Analytical<br><i>CrysAlis PRO</i> 1.171.39.46 (Rigaku Oxford Diffraction, 2018)<br>Analytical numeric absorption correction using a multifaceted crystal model based on expressions derived by R.C. Clark & J.S. Reid. (Clark, R. C. & Reid, J. S. (1995). <i>Acta Cryst.</i> A51, 887-897) Empirical absorption correction using spherical harmonics, implemented in SCALE3 ABSPACK scaling algorithm. |
| $T_{\min}, T_{\max}$                                                       | 0.844, 0.966                                                                                                                                                                                                                                                                                                                                                                                            |
| No. of measured, independent and observed [ $I > 2\sigma(I)$ ] reflections | 35563, 10306, 9894                                                                                                                                                                                                                                                                                                                                                                                      |
| $R_{\text{int}}$                                                           | 0.022                                                                                                                                                                                                                                                                                                                                                                                                   |
| $(\sin \theta/\lambda)_{\text{max}}$ (Å <sup>-1</sup> )                    | 0.616                                                                                                                                                                                                                                                                                                                                                                                                   |
| Refinement                                                                 |                                                                                                                                                                                                                                                                                                                                                                                                         |
| $R[F^2 > 2\sigma(F^2)], wR(F^2), S$                                        | 0.034, 0.094, 1.06                                                                                                                                                                                                                                                                                                                                                                                      |
| No. of reflections                                                         | 10306                                                                                                                                                                                                                                                                                                                                                                                                   |
| No. of parameters                                                          | 715                                                                                                                                                                                                                                                                                                                                                                                                     |
| No. of restraints                                                          | 134                                                                                                                                                                                                                                                                                                                                                                                                     |

|                                                               |                                                                                                                              |
|---------------------------------------------------------------|------------------------------------------------------------------------------------------------------------------------------|
| H-atom treatment                                              | H atoms treated by a mixture of independent and constrained refinement                                                       |
| $\Delta\rho_{\max}, \Delta\rho_{\min}$ (e $\text{\AA}^{-3}$ ) | 0.29, -0.21                                                                                                                  |
| Absolute structure                                            | Flack x determined using 4583 quotients [(I+)-(I-)]/[(I+)+(I-)] (Parsons, Flack and Wagner, Acta Cryst. B69 (2013) 249-259). |
| Absolute structure parameter                                  | -0.06 (6)                                                                                                                    |

### XIII. NMR Spectra

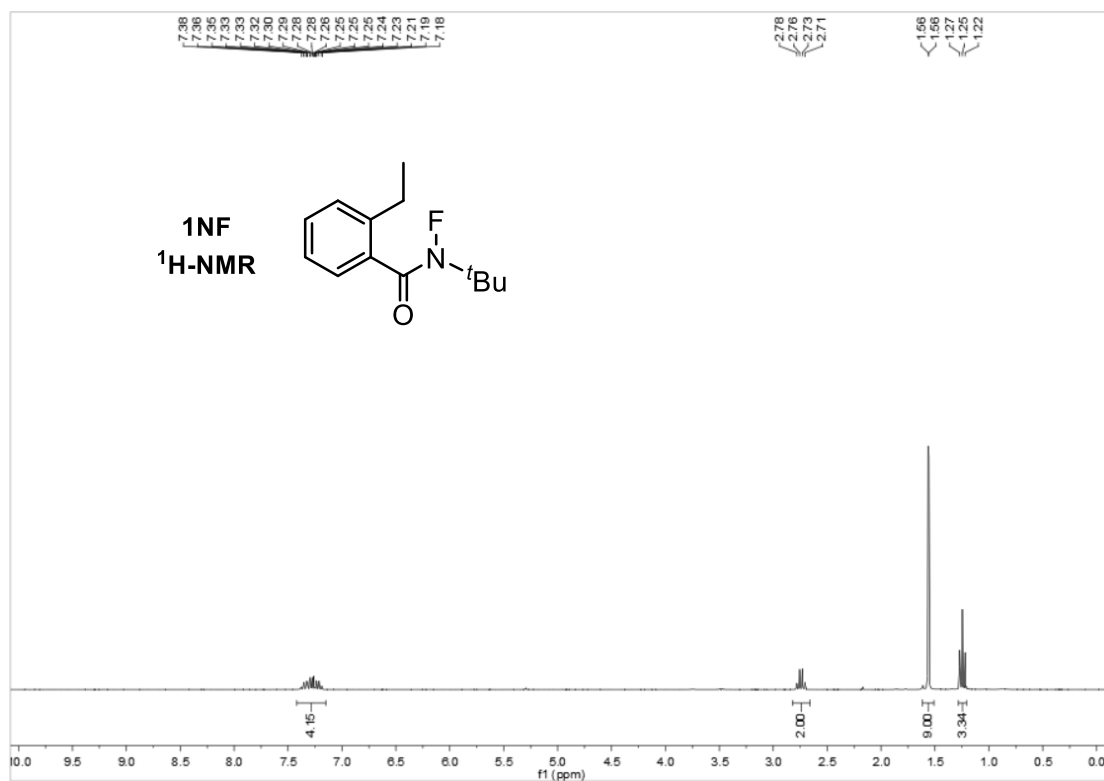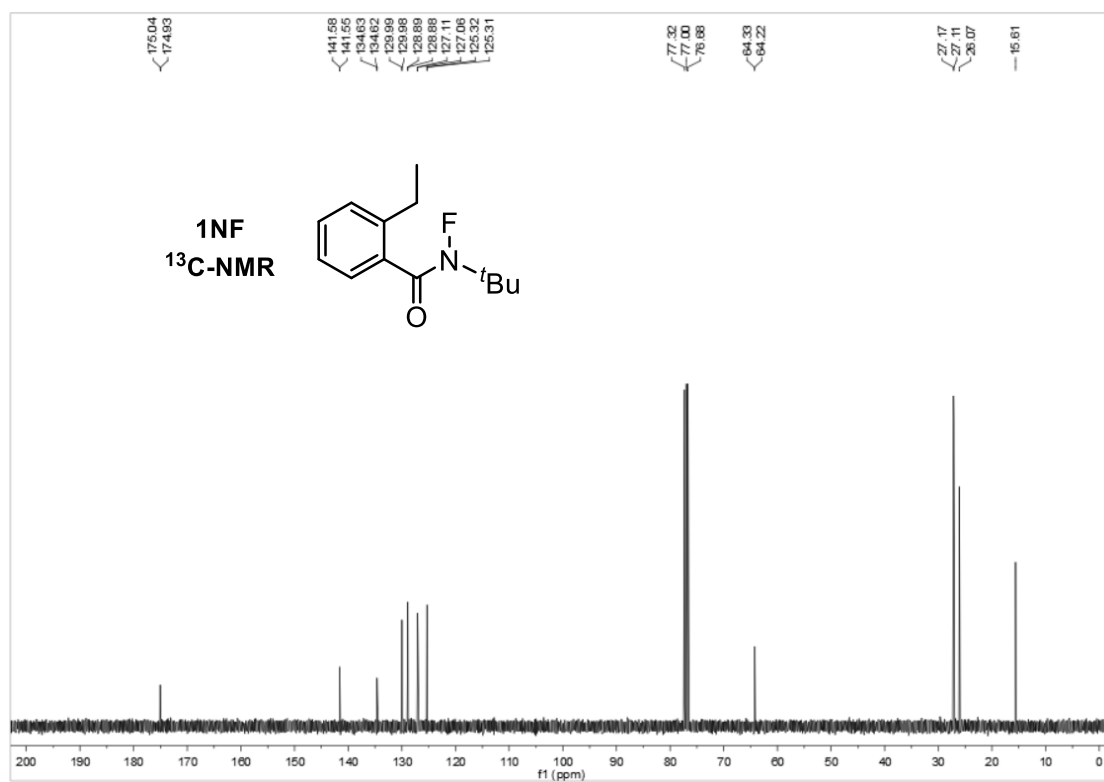

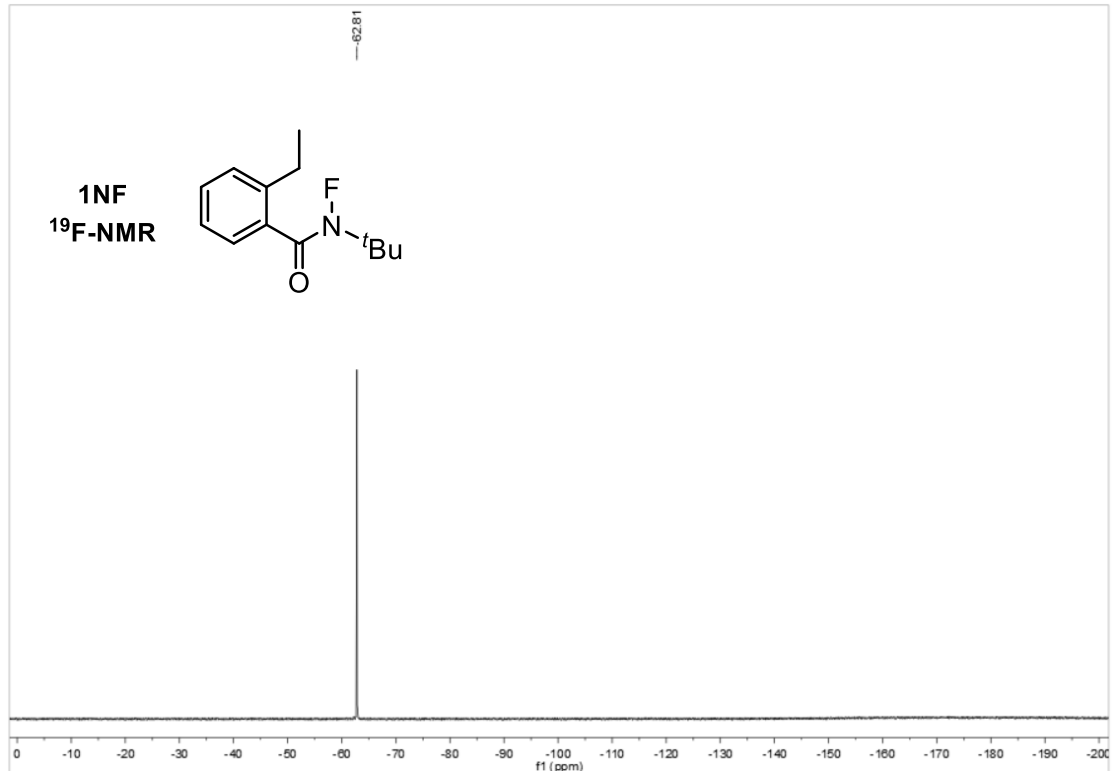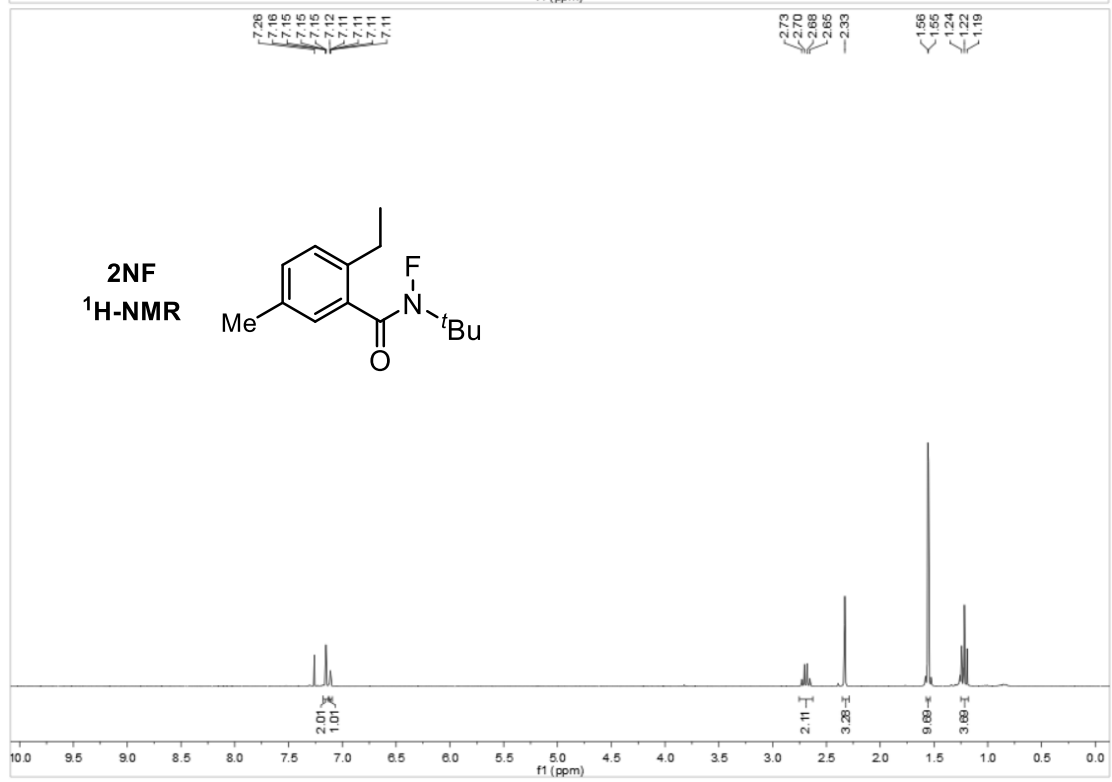

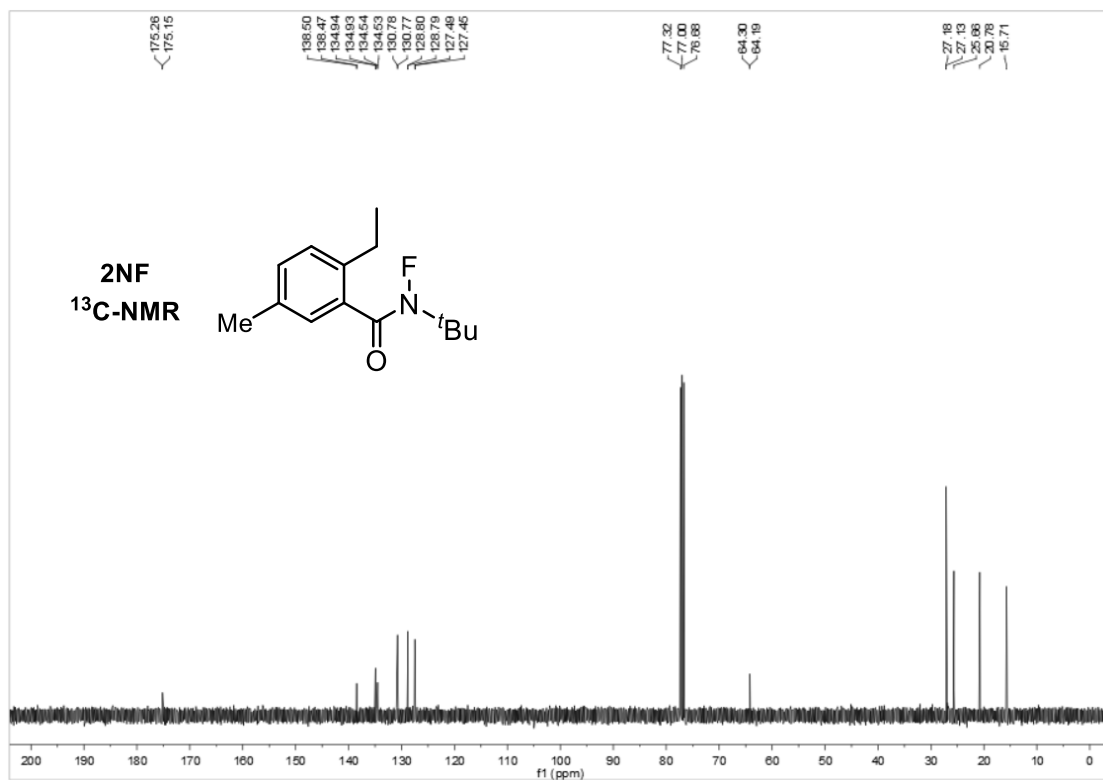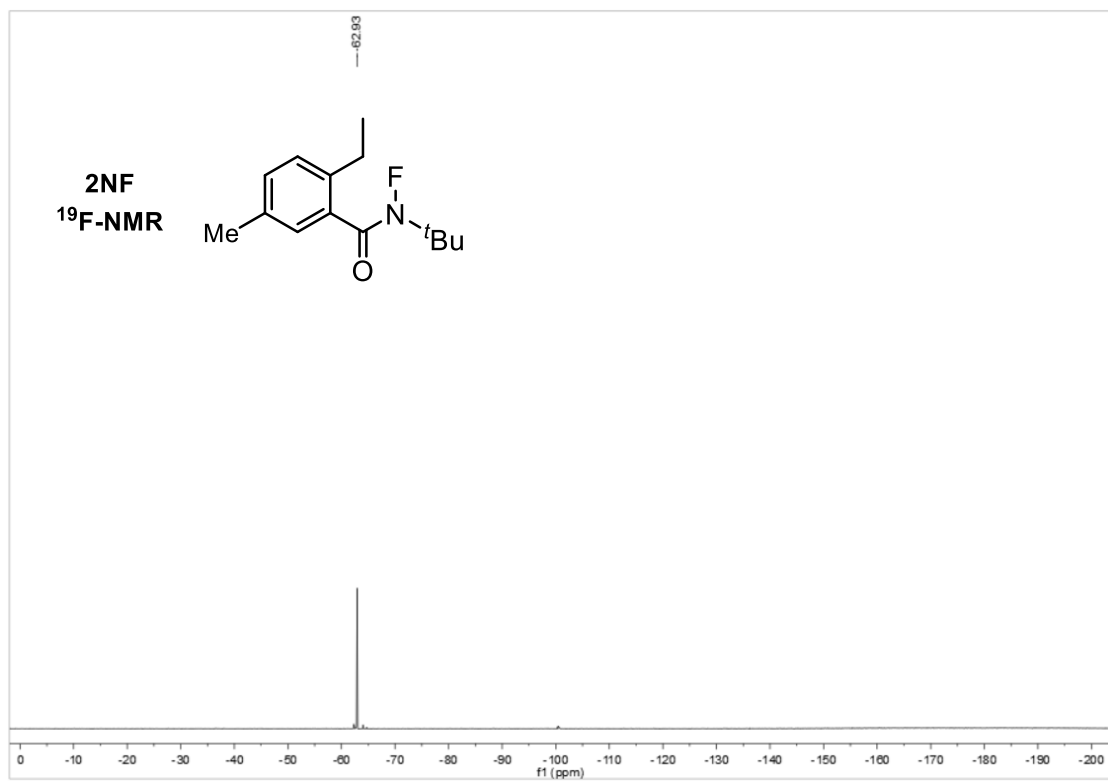



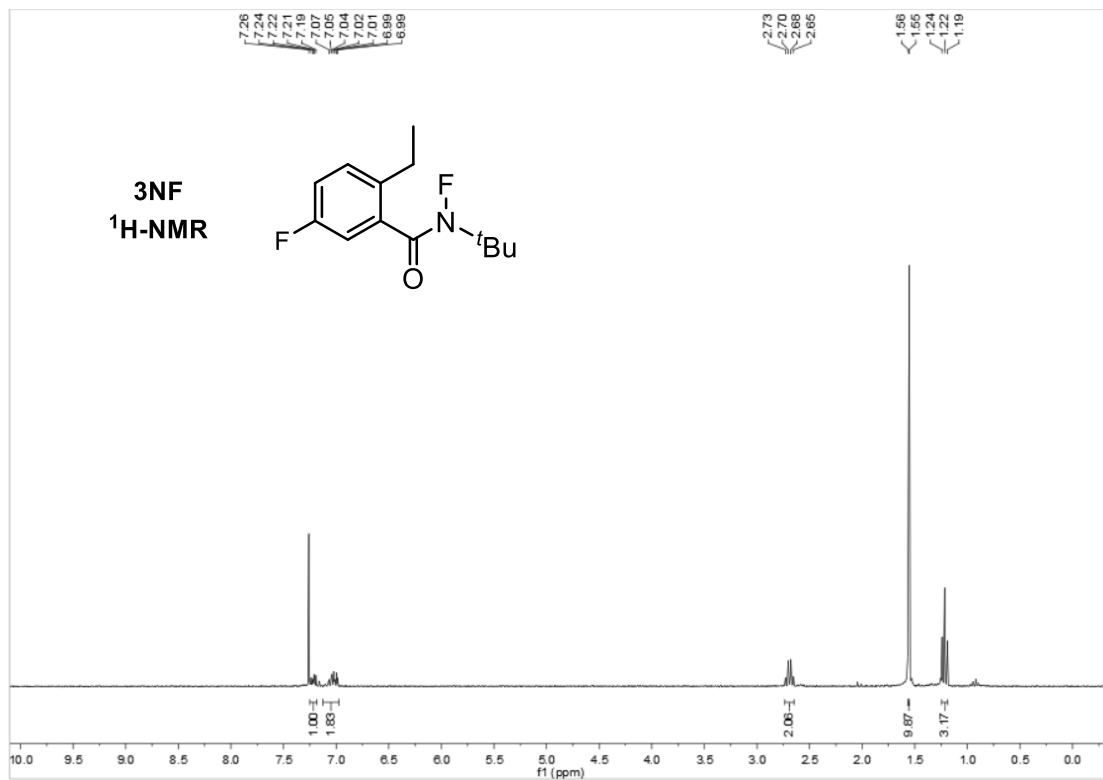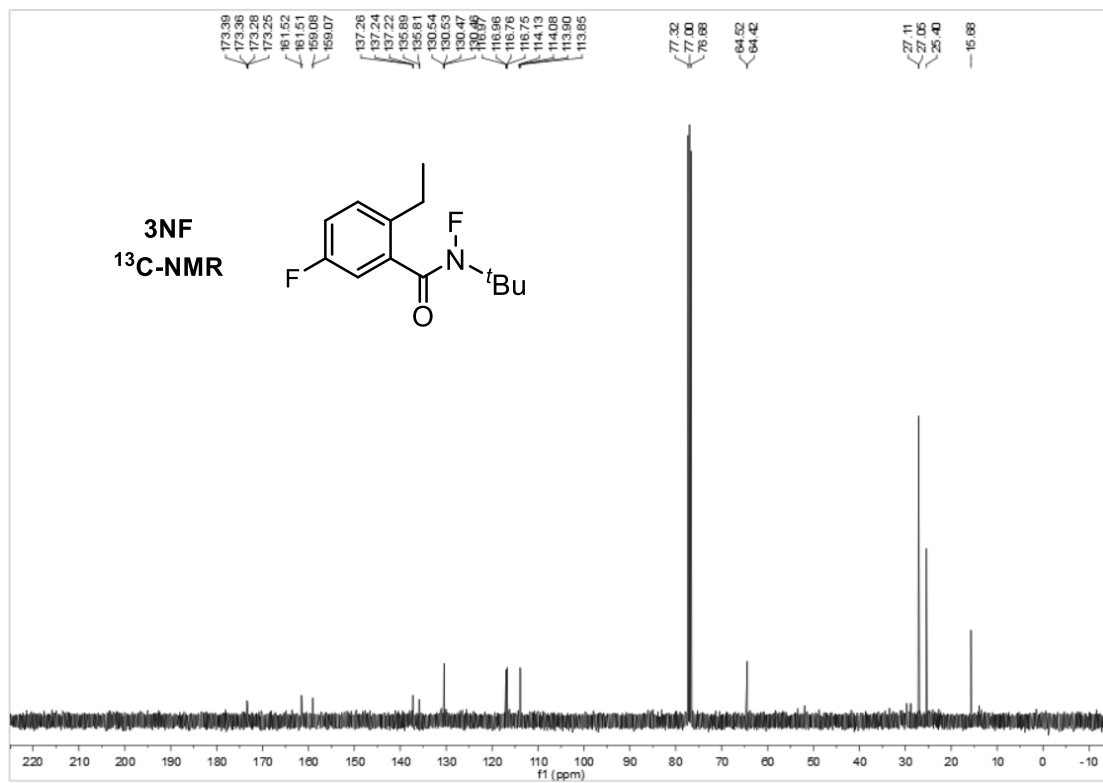

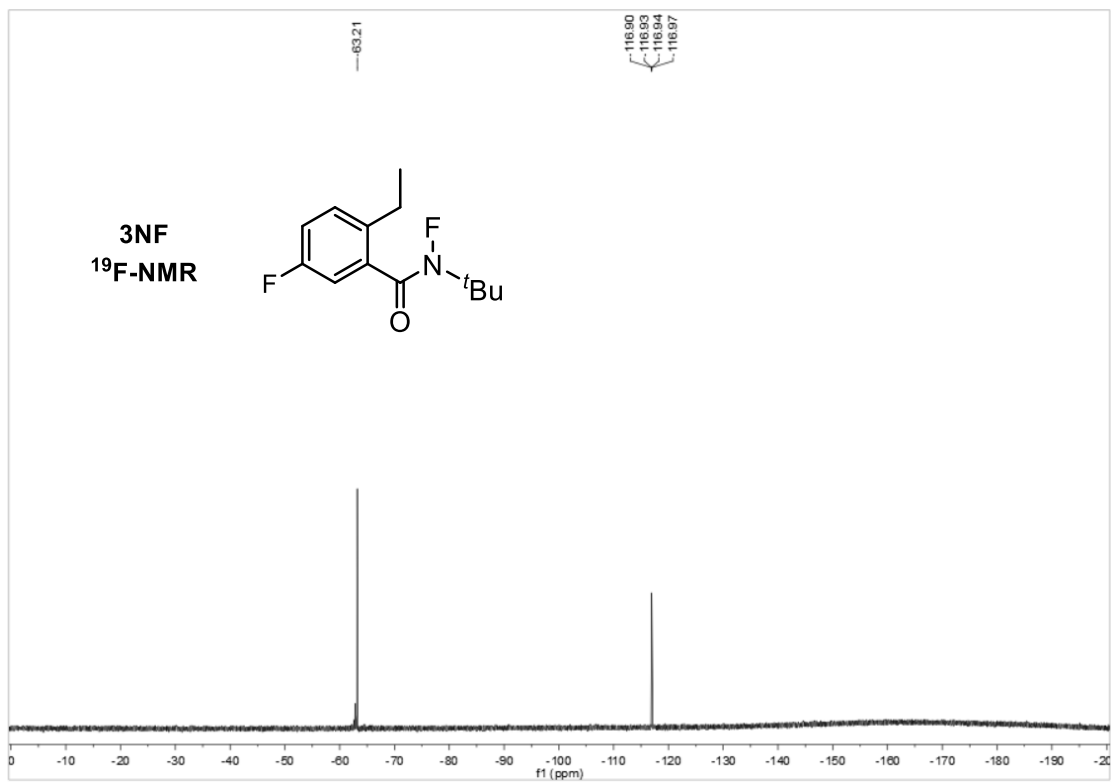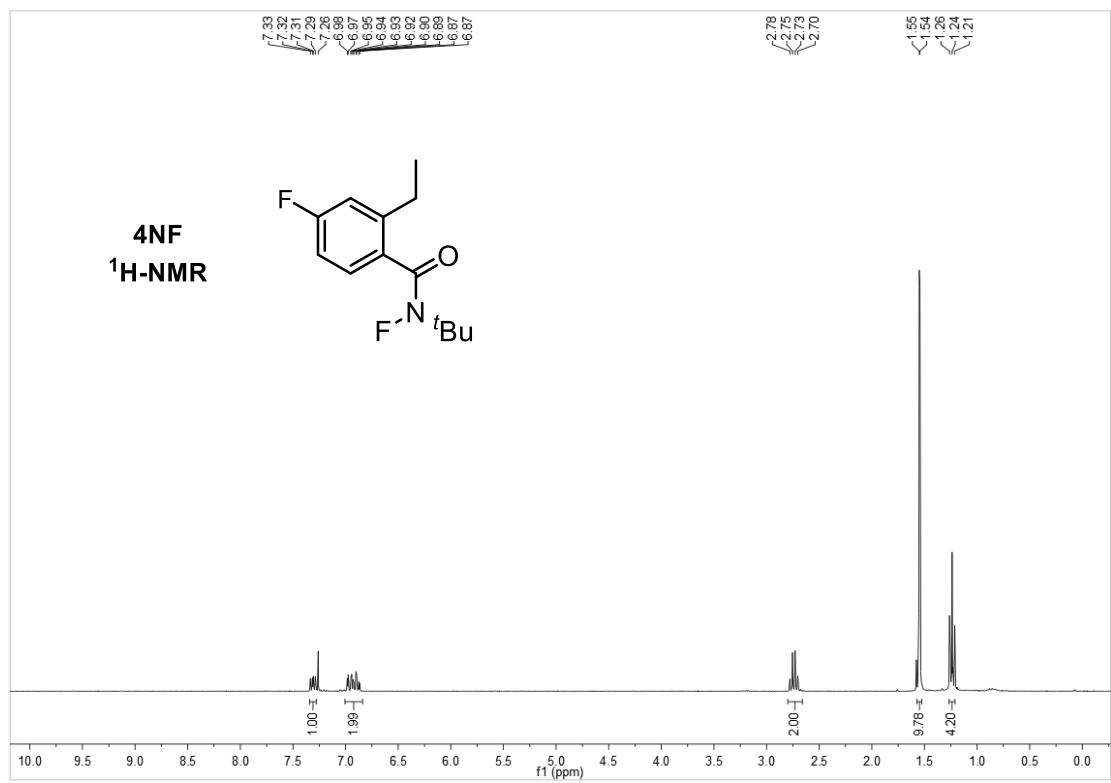

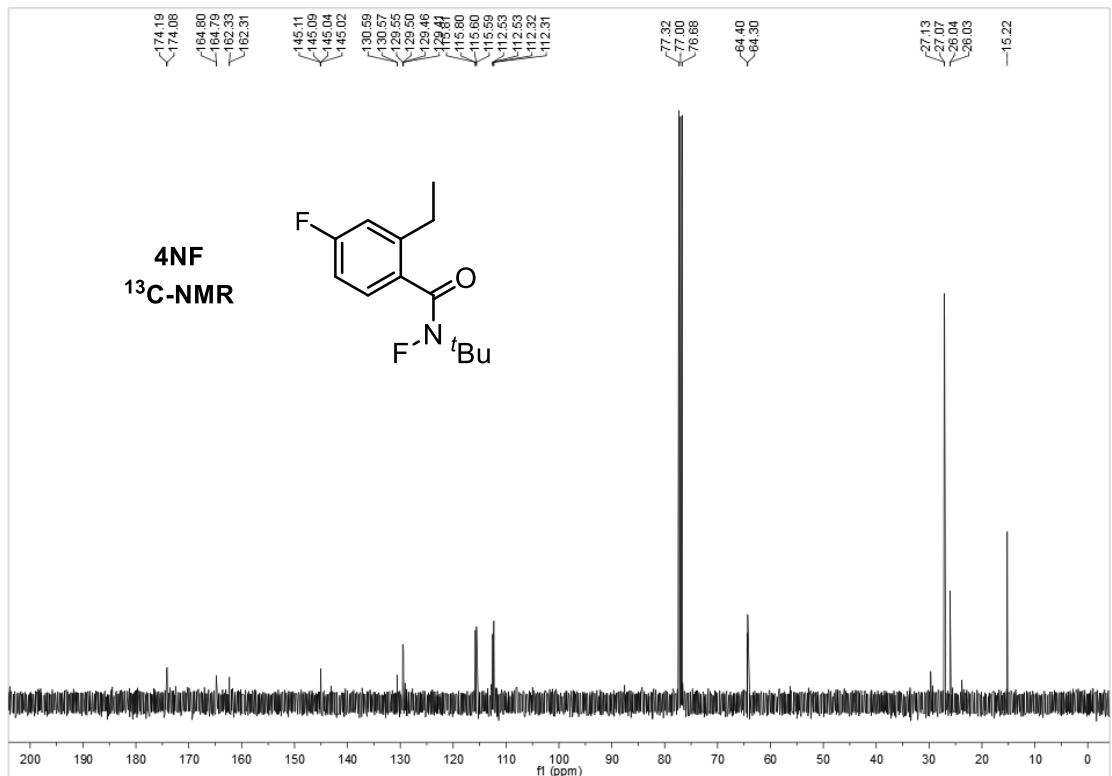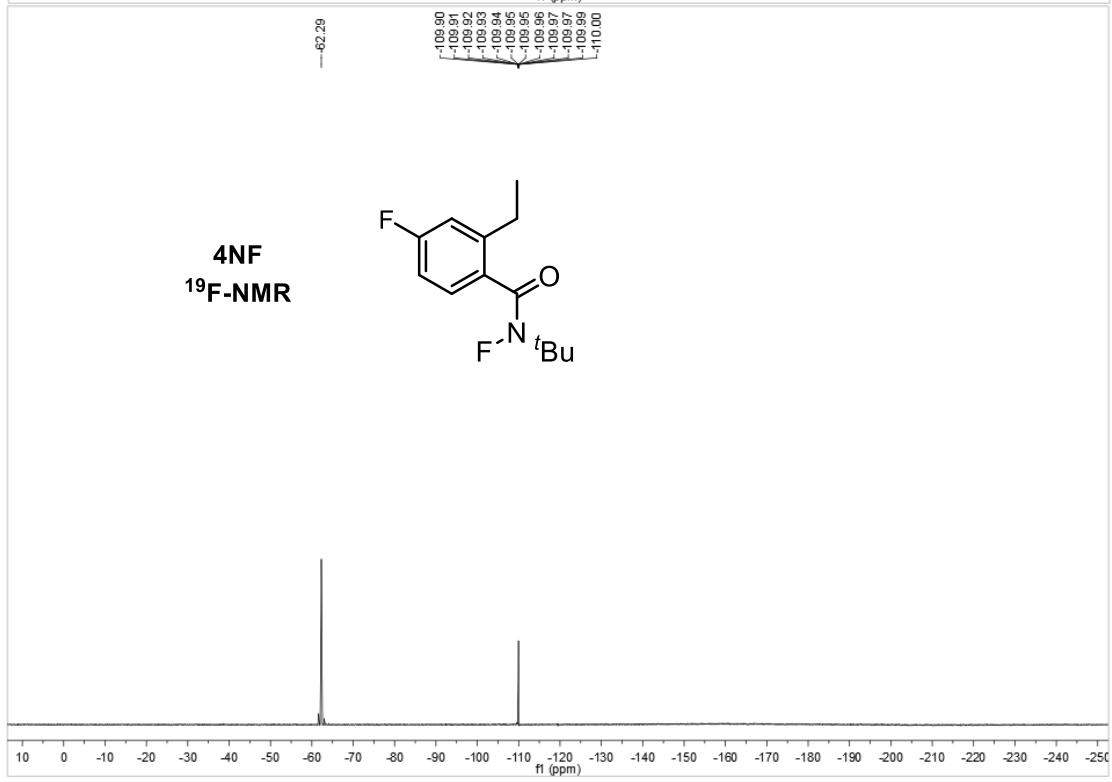

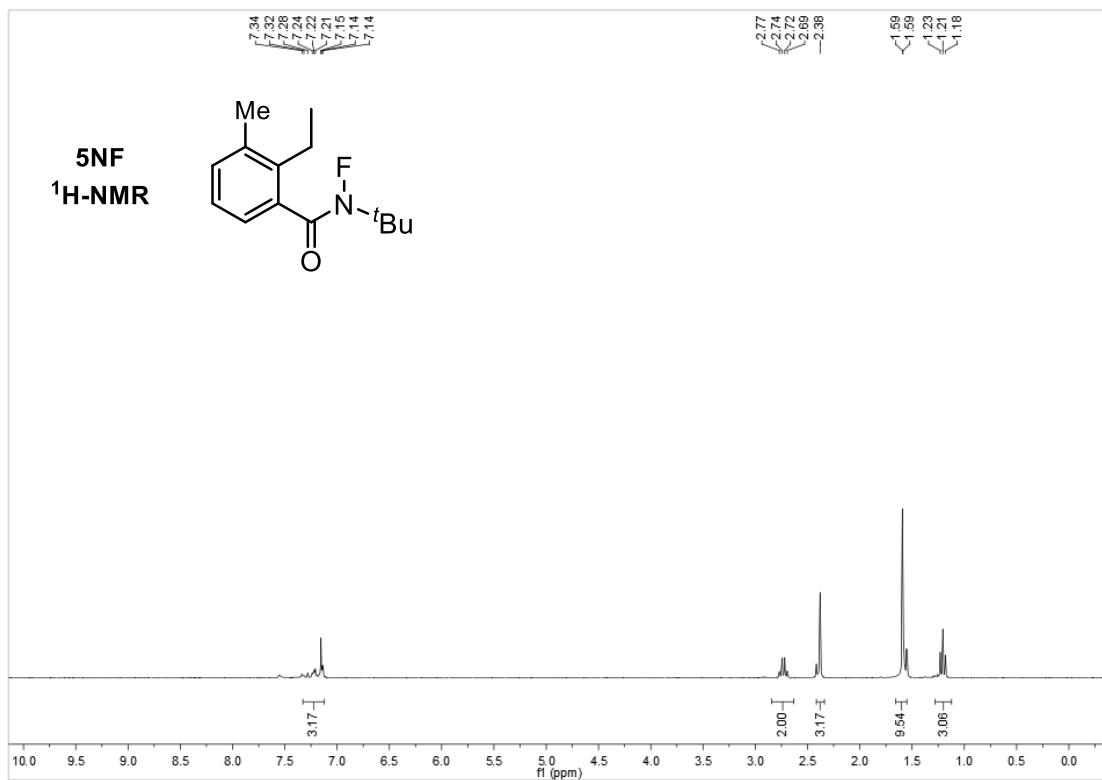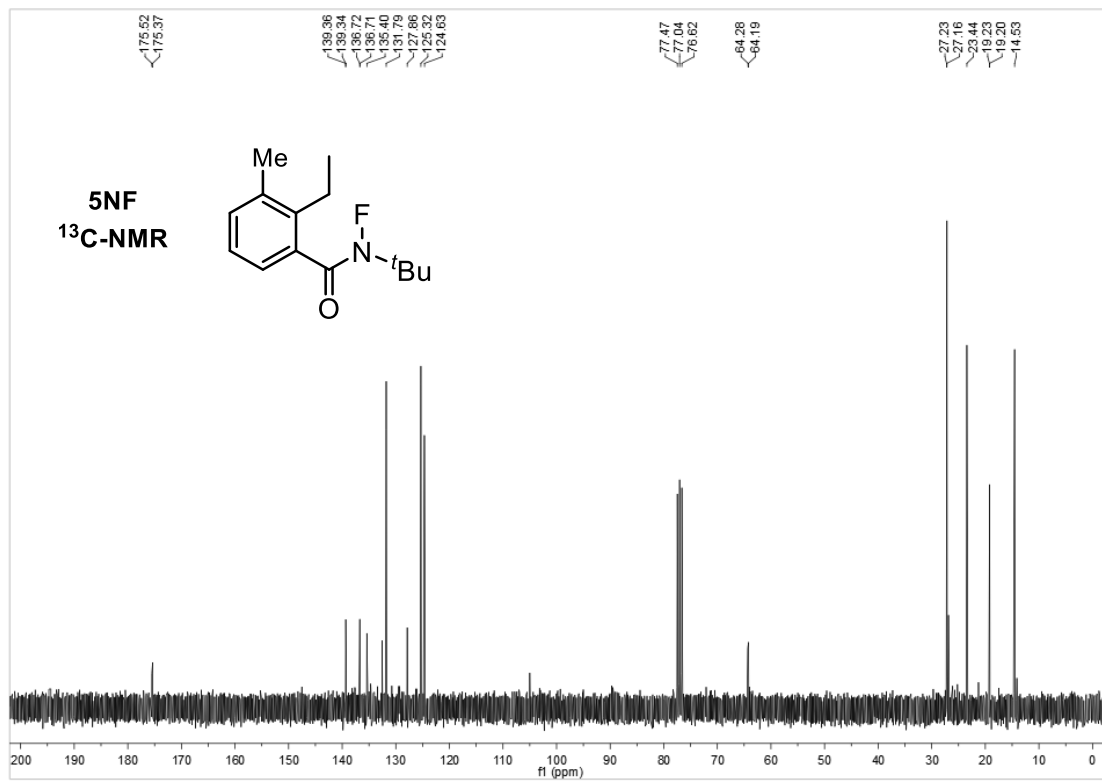

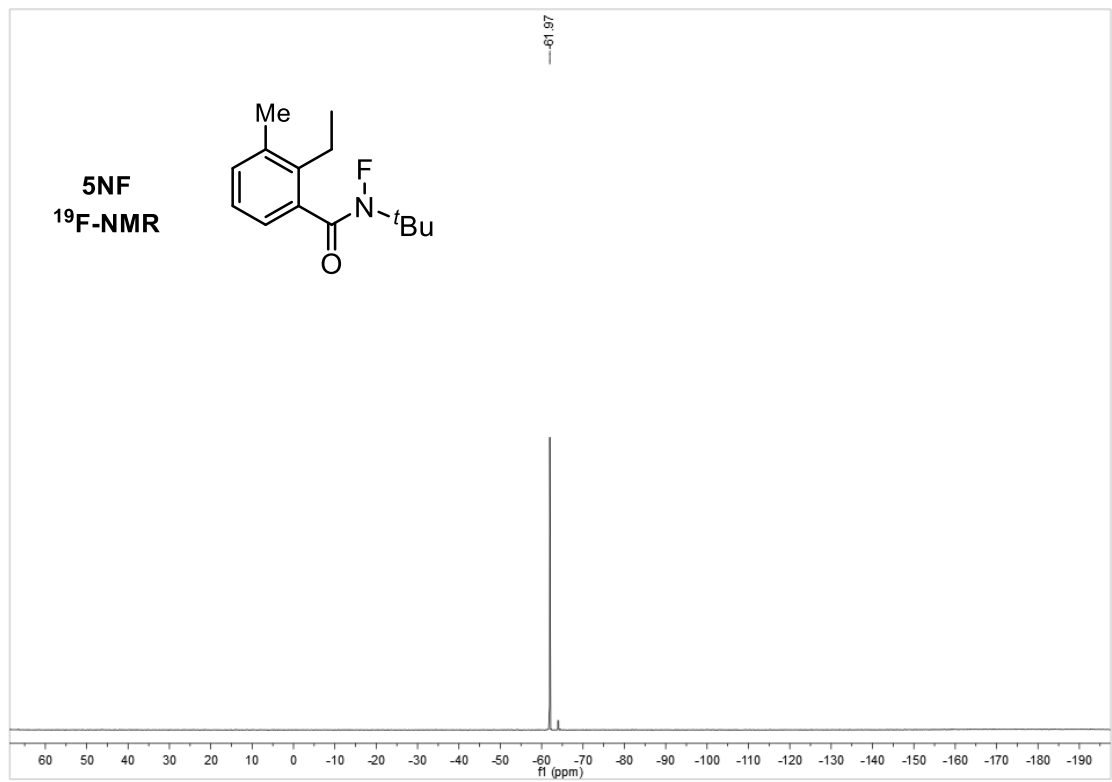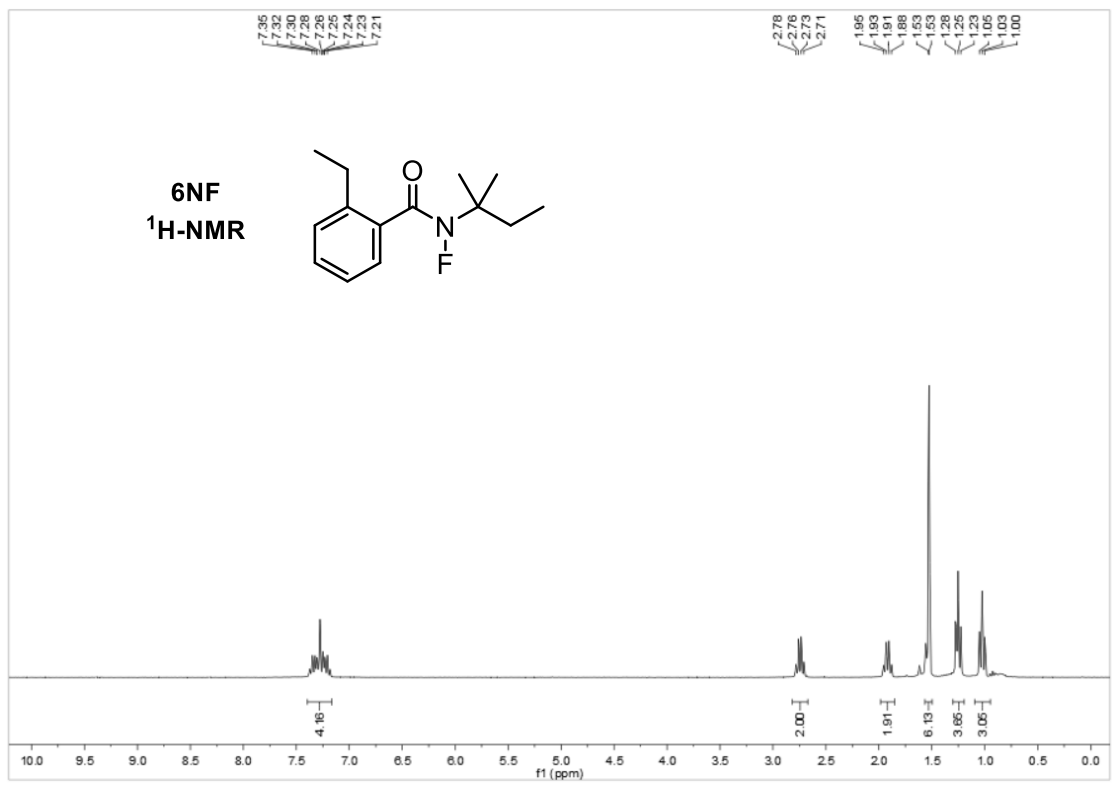

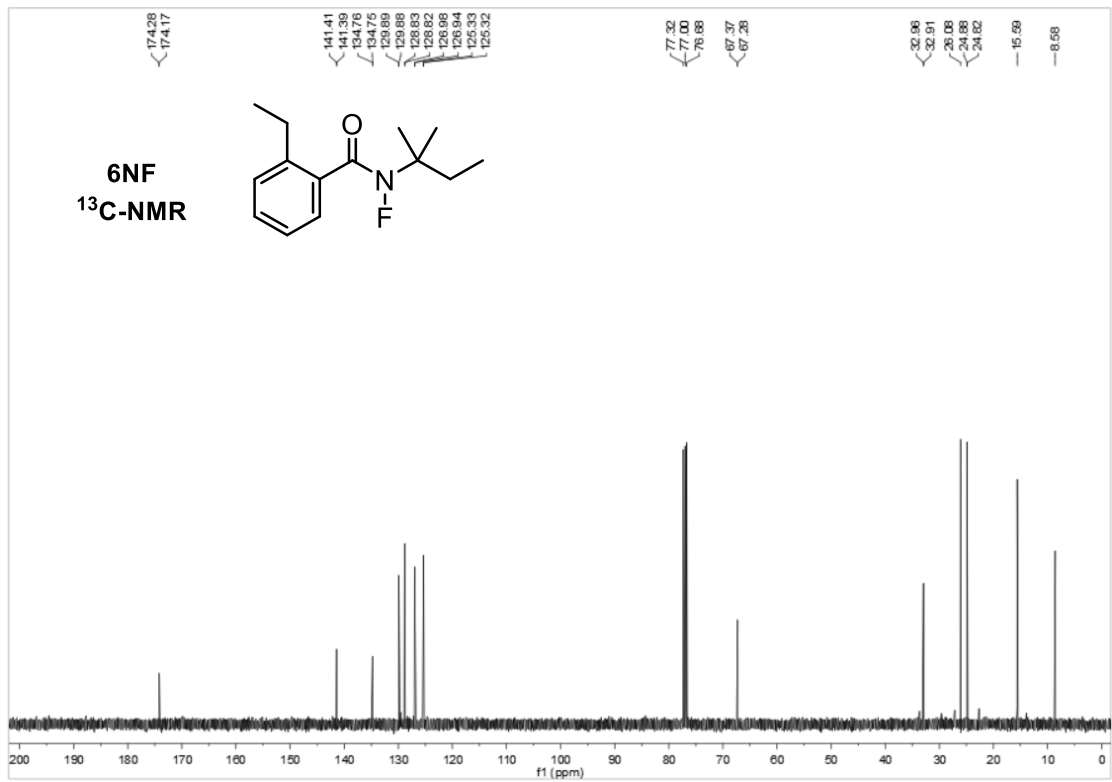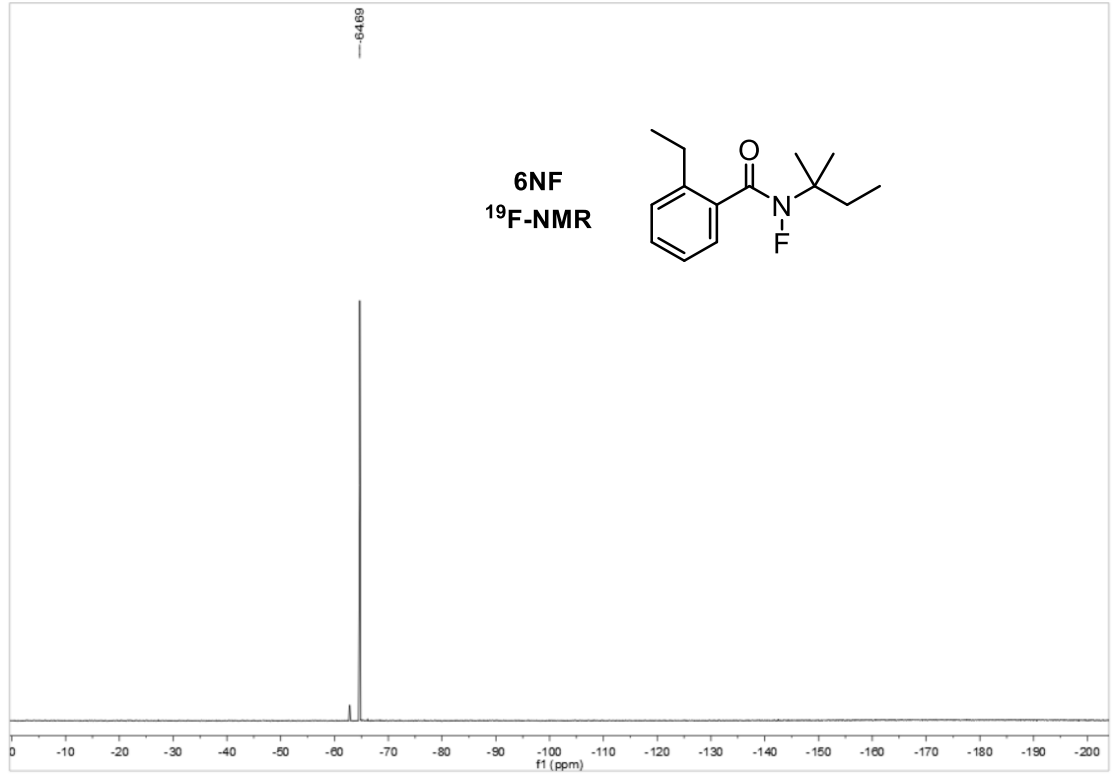

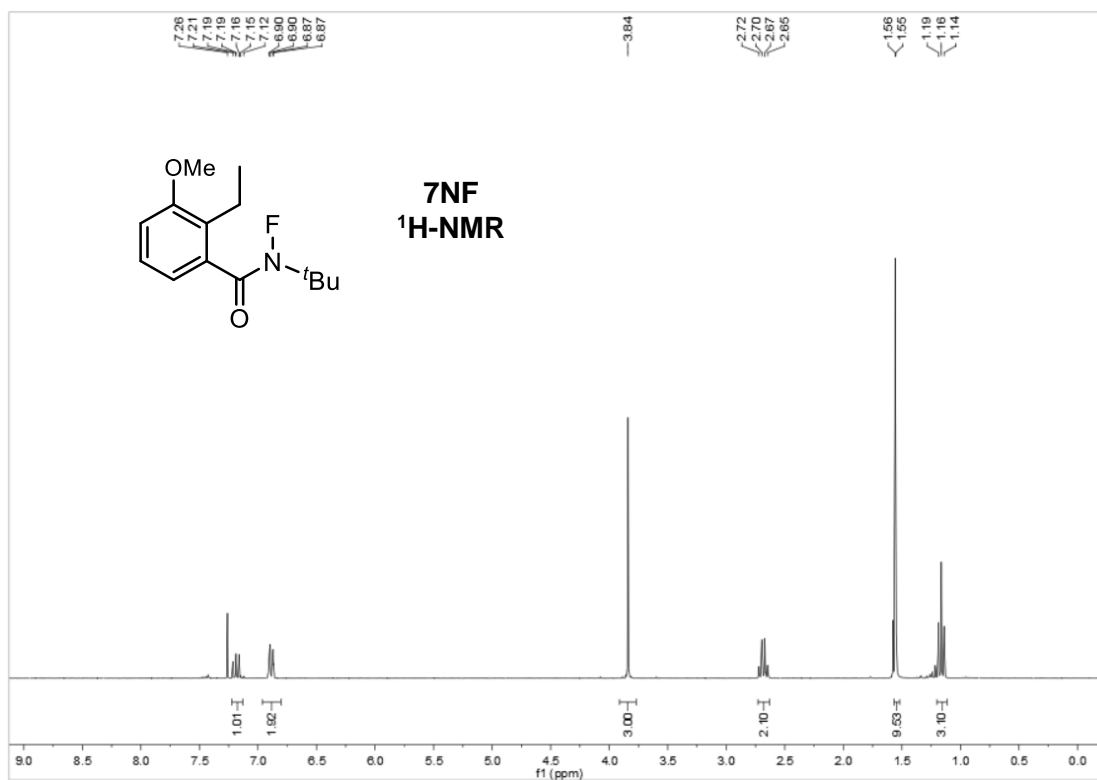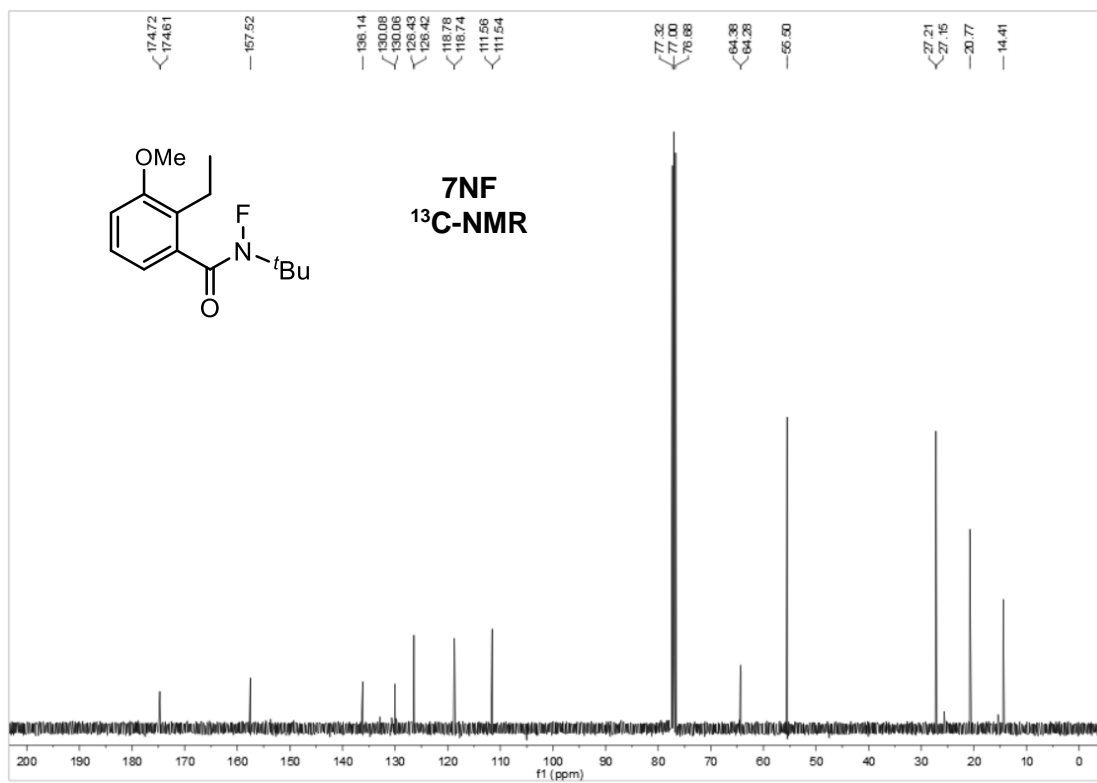

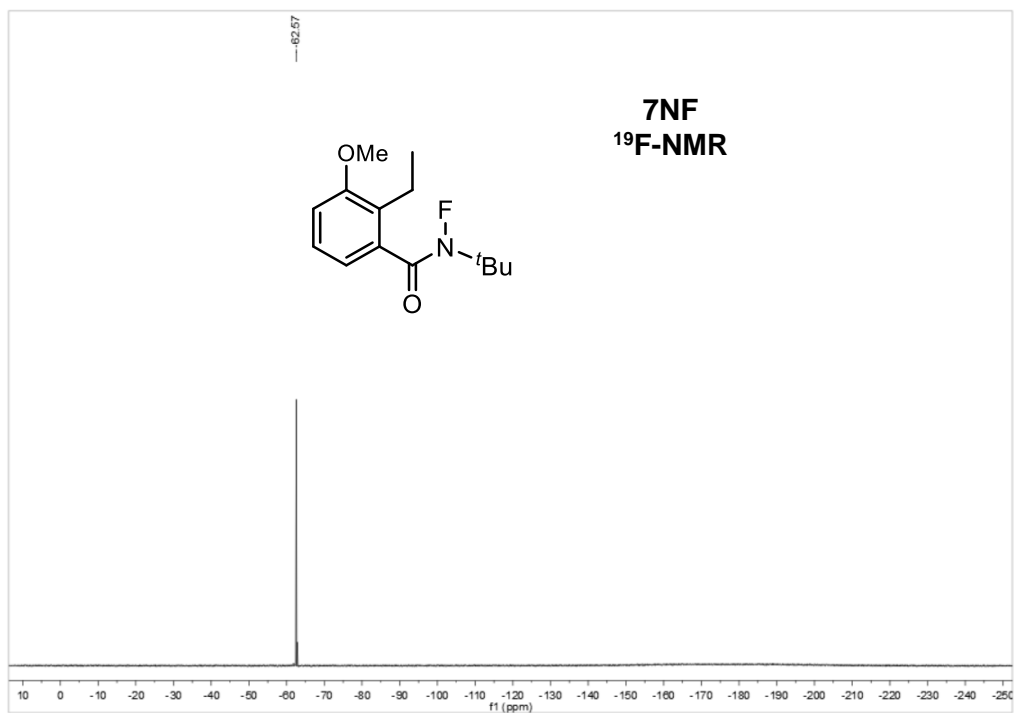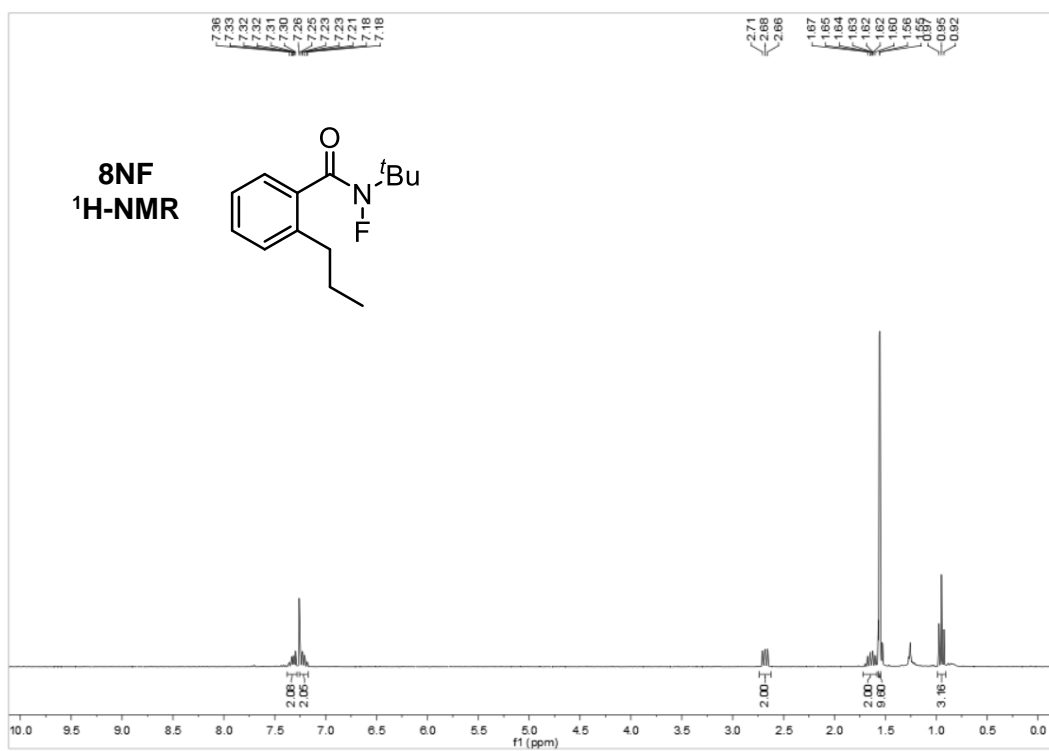



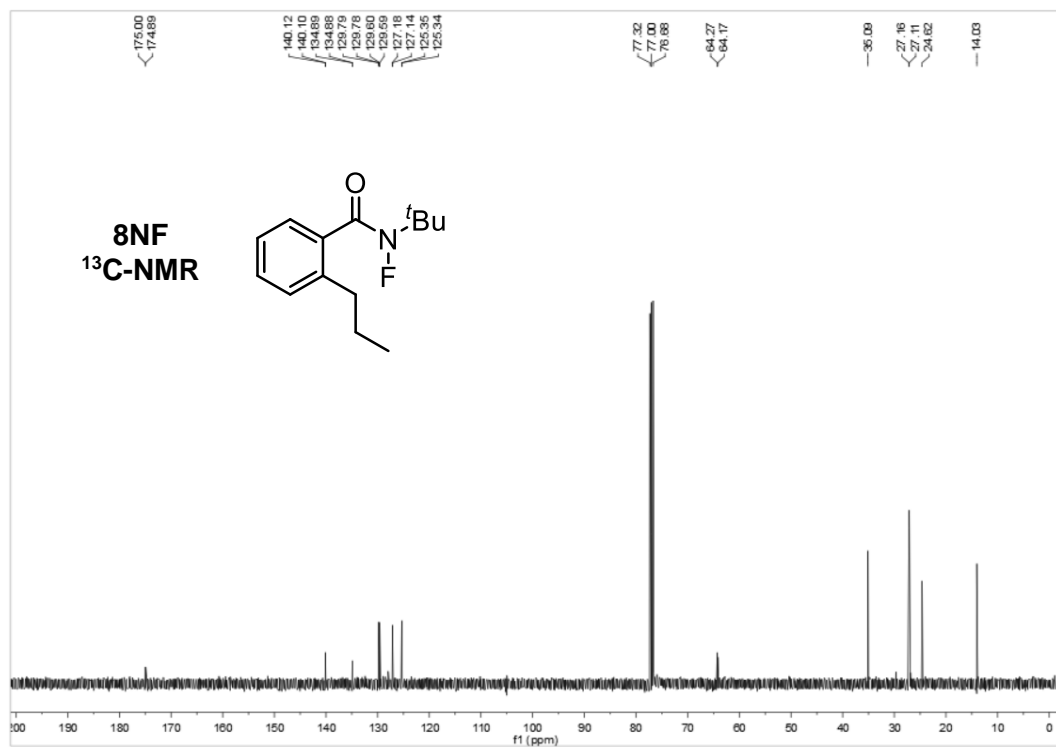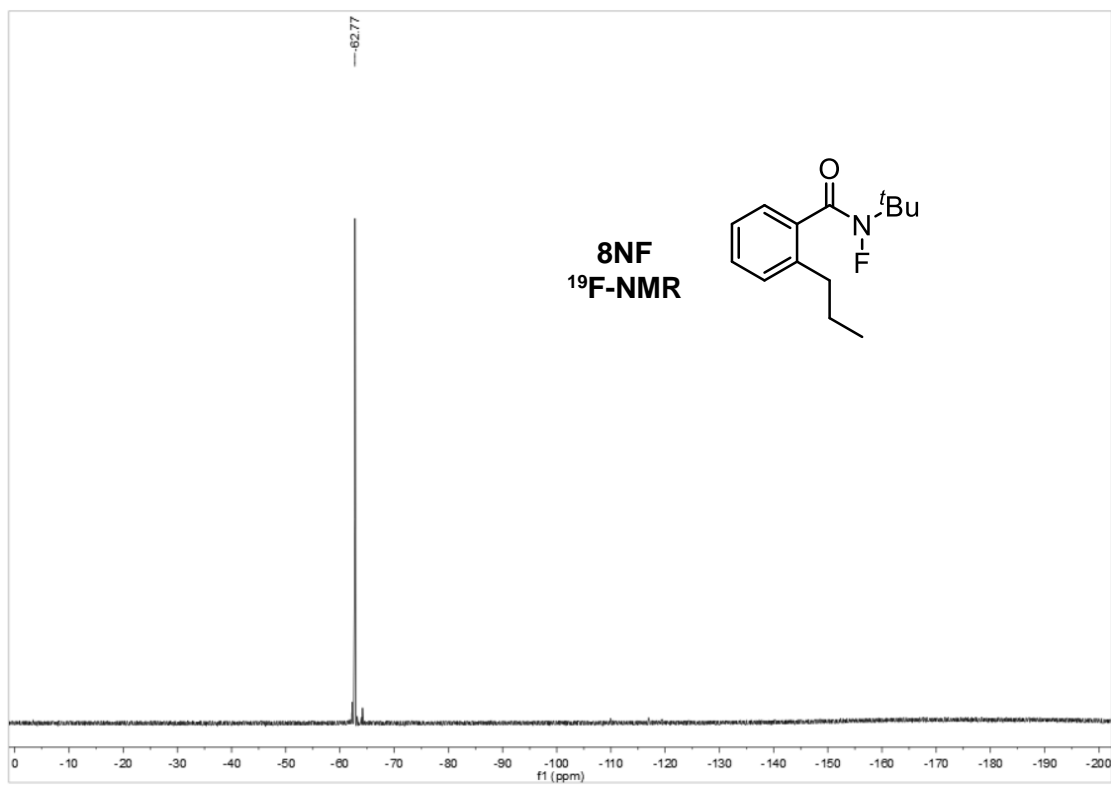

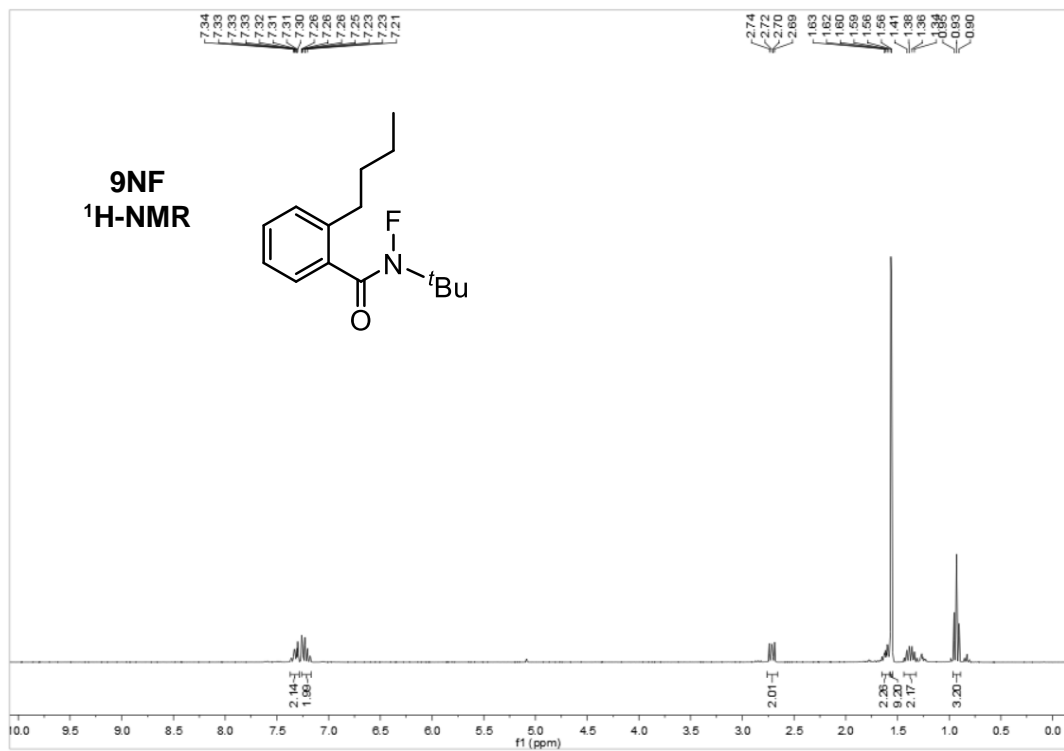

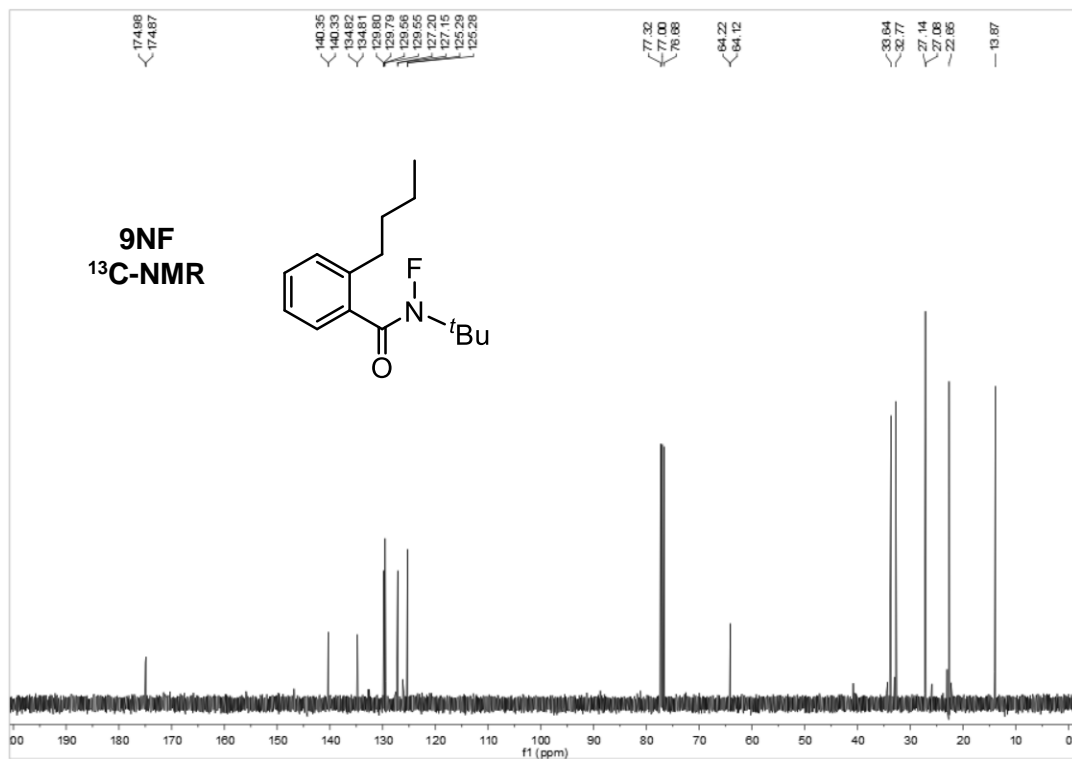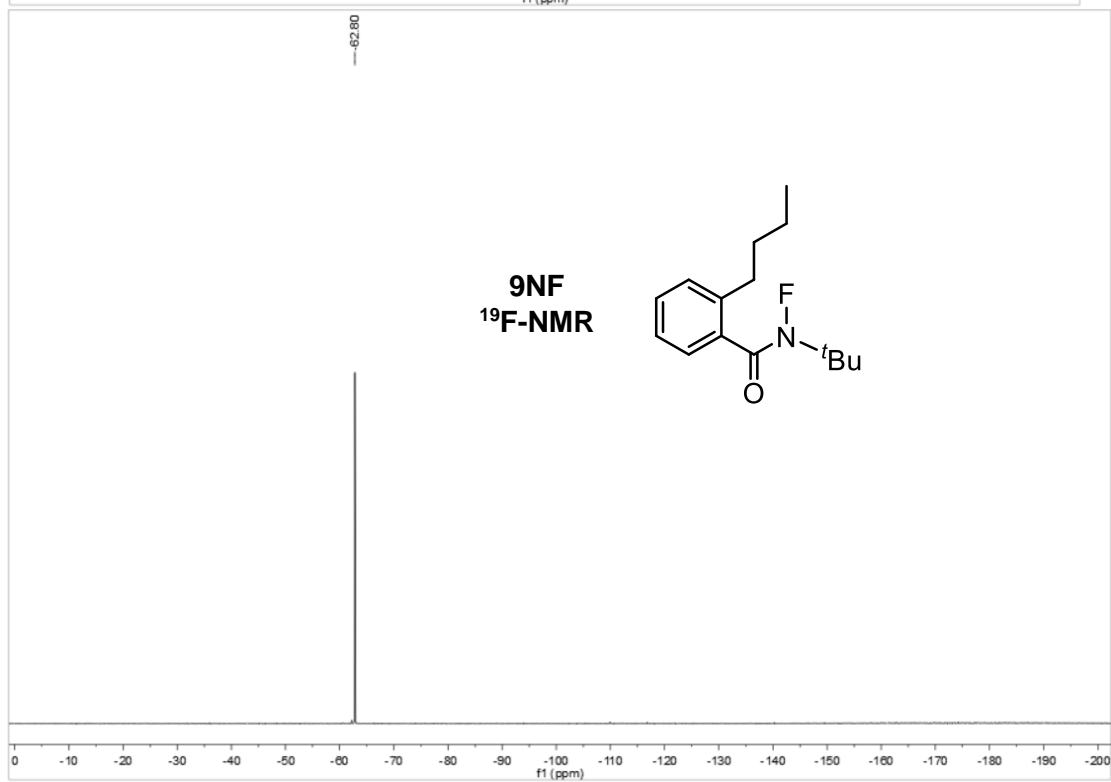

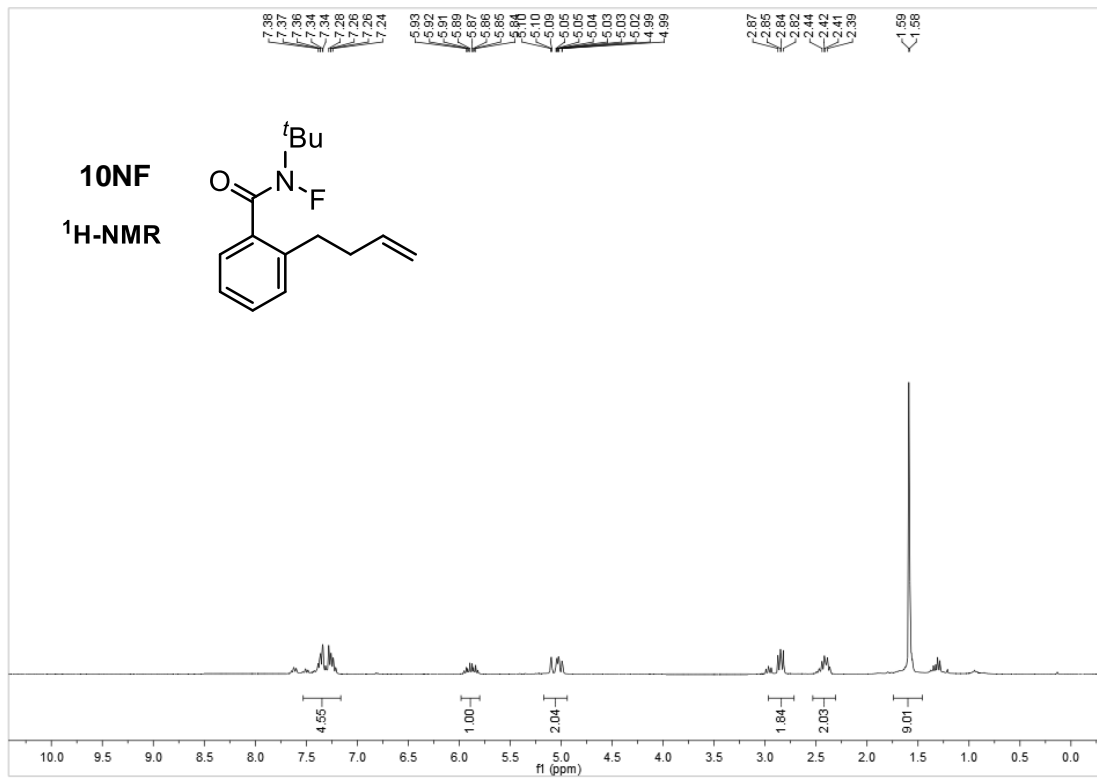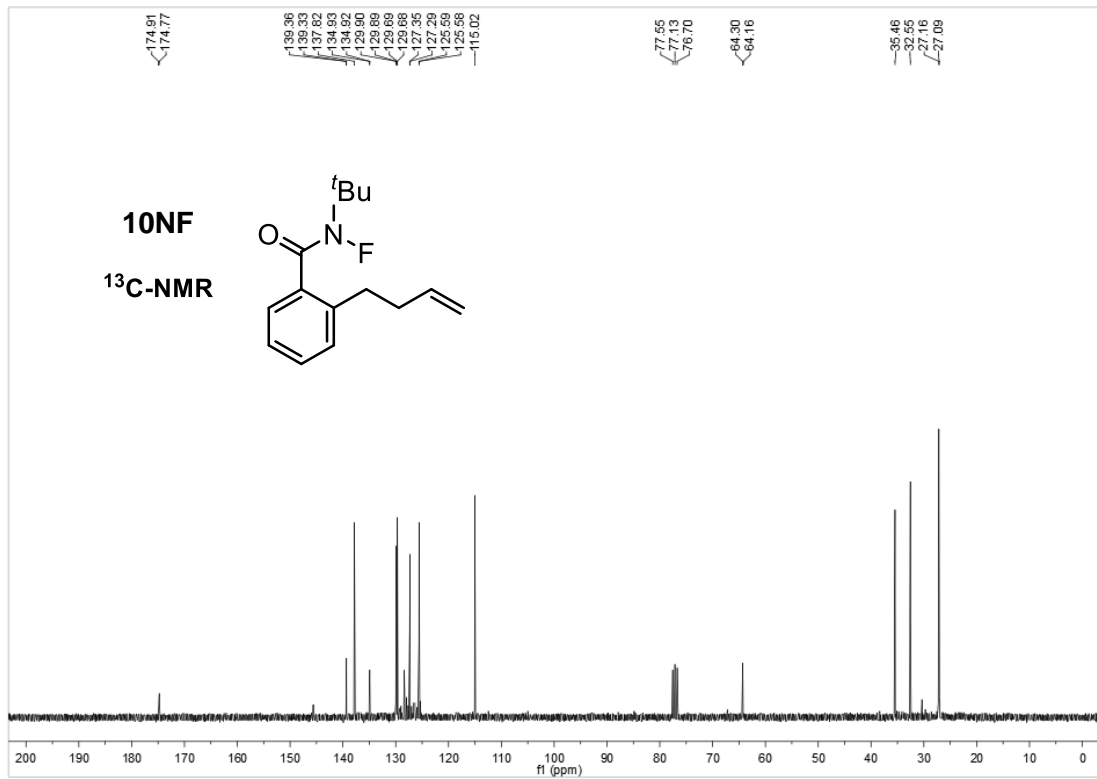

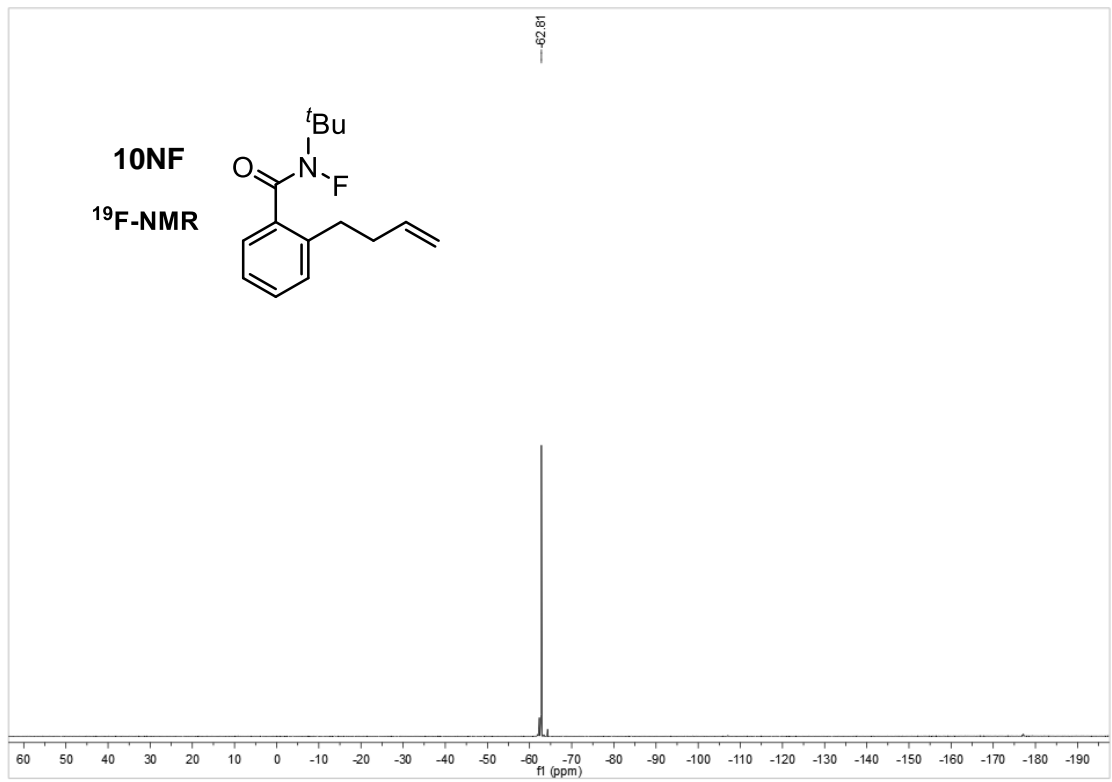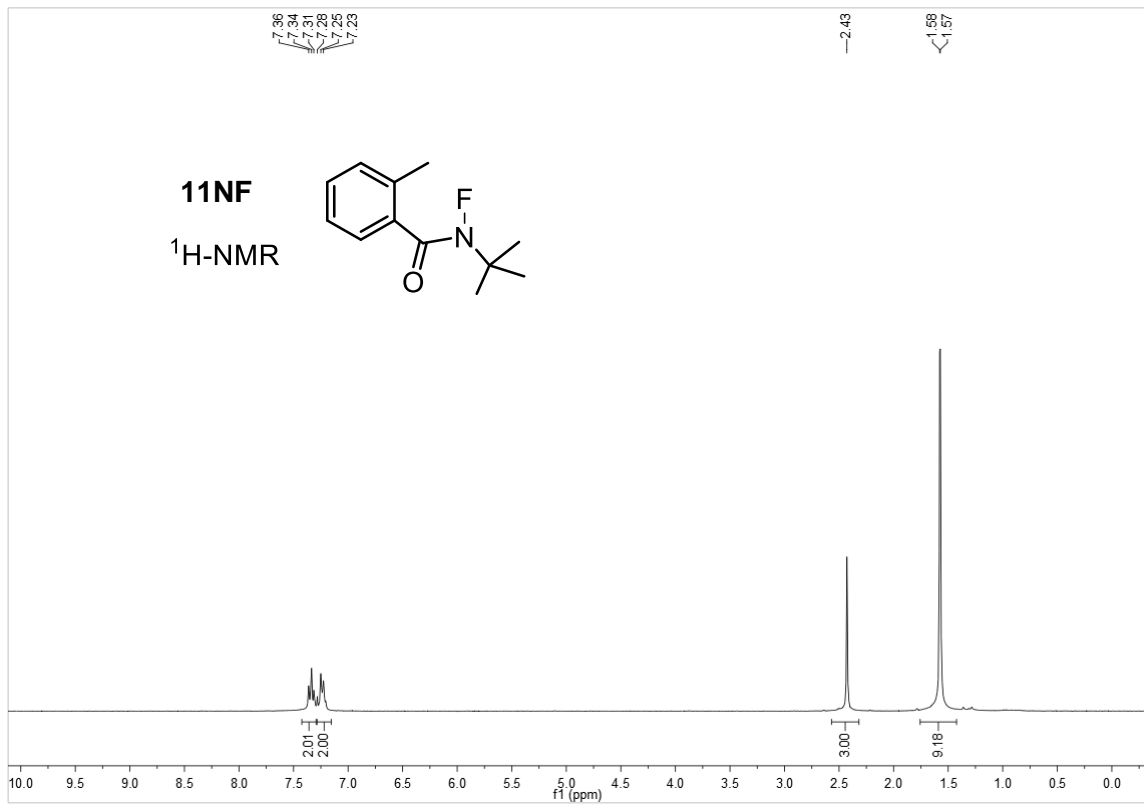

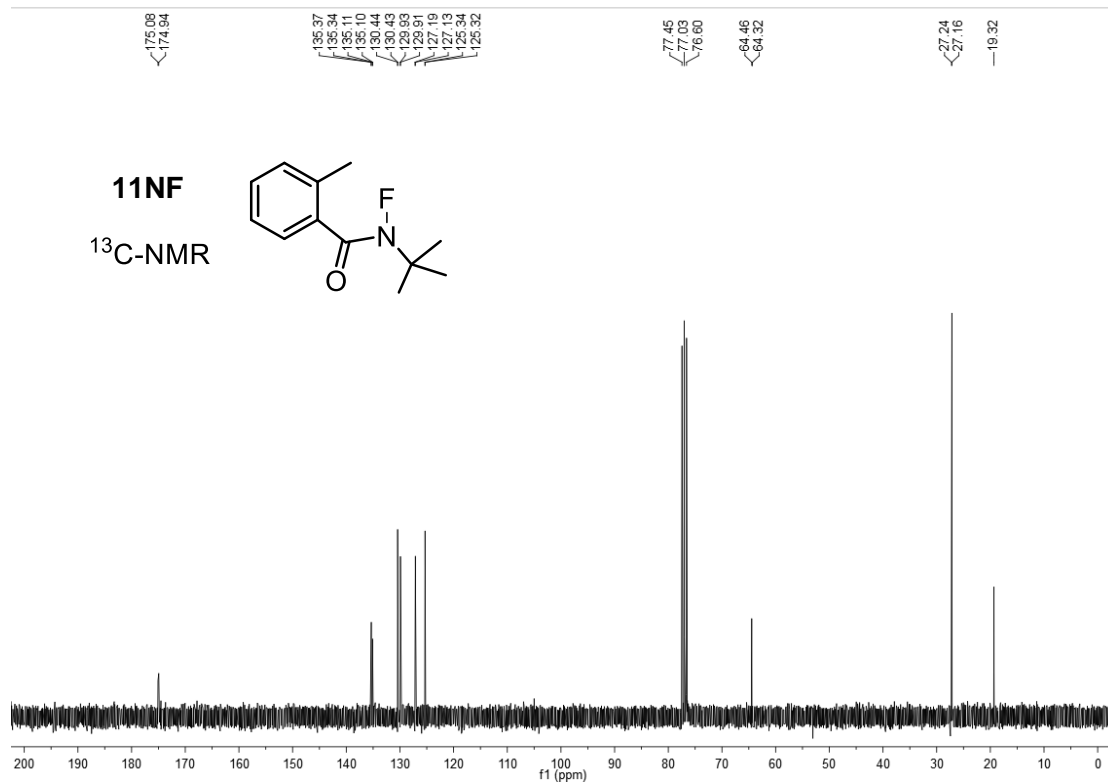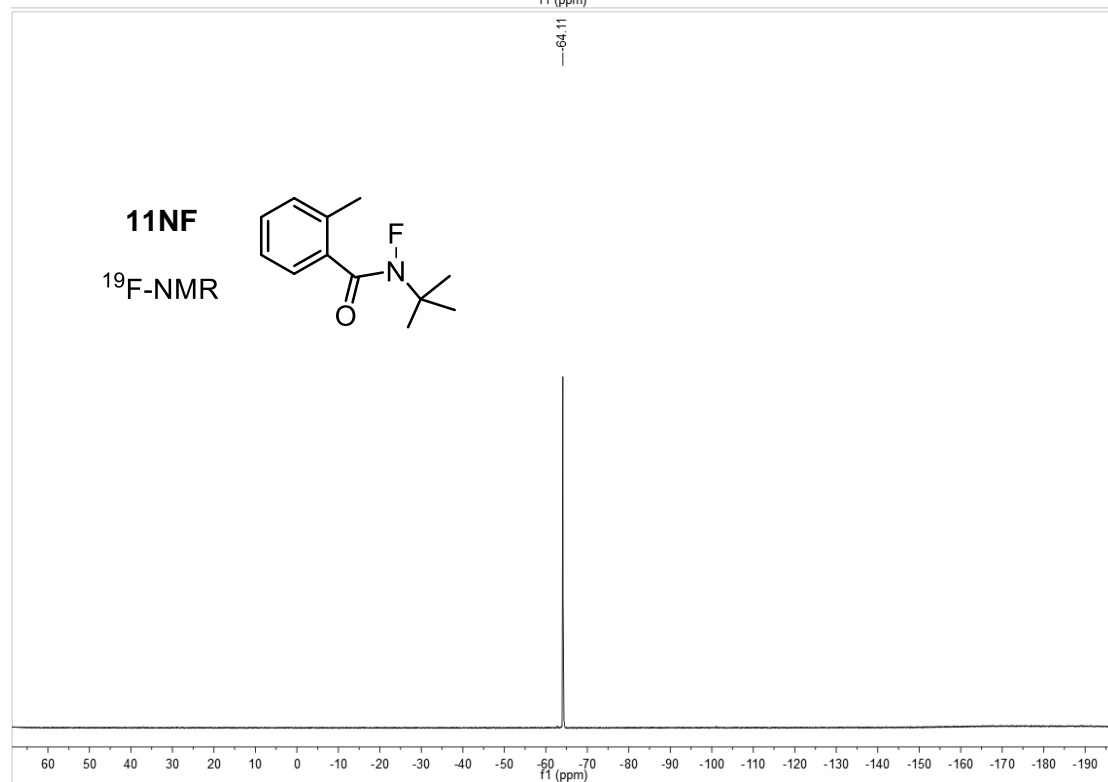

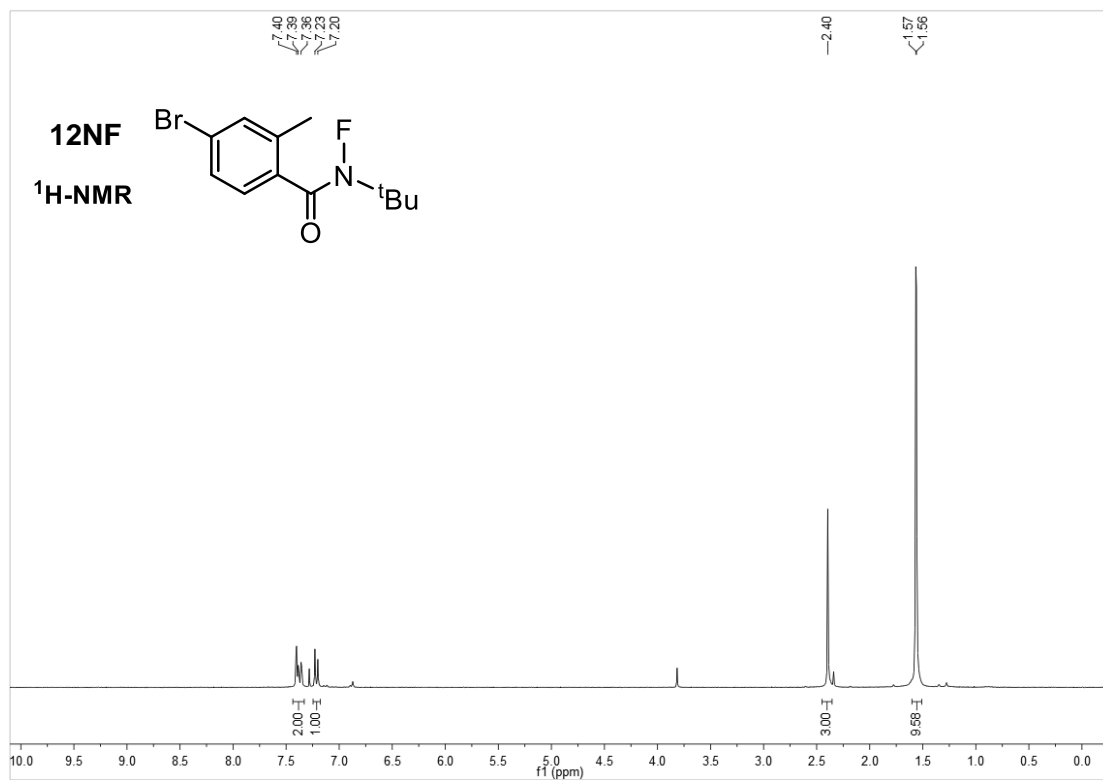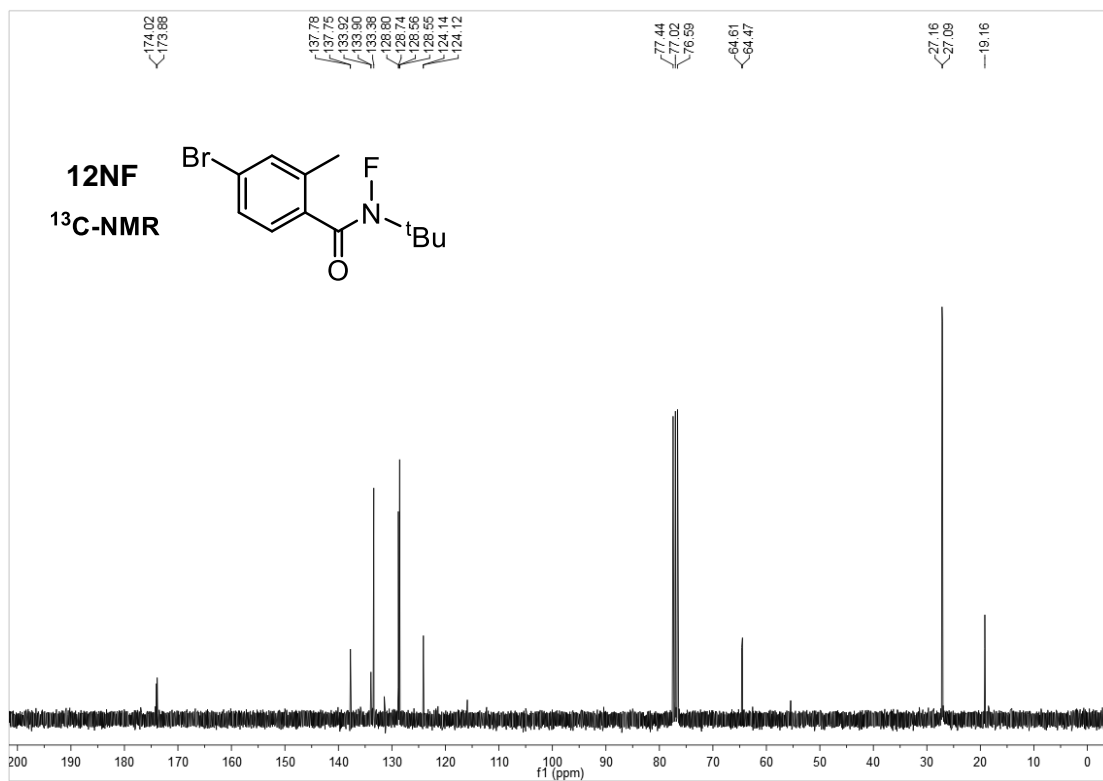

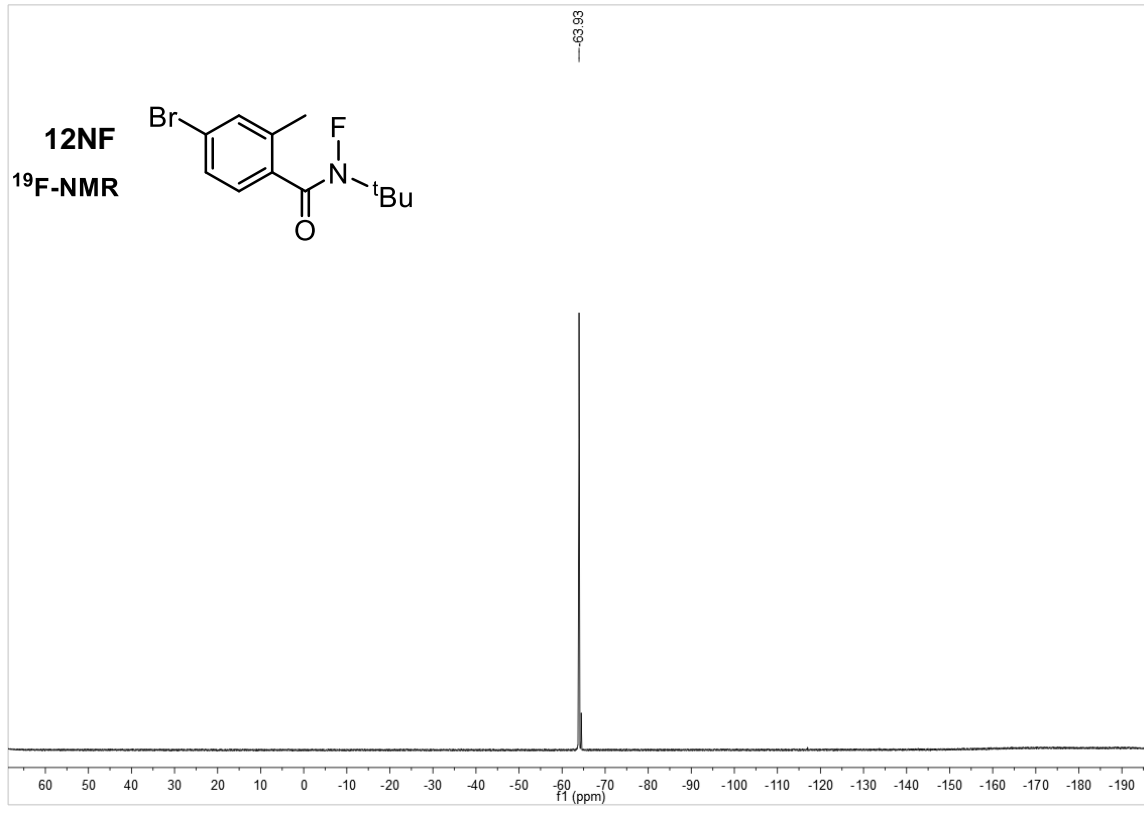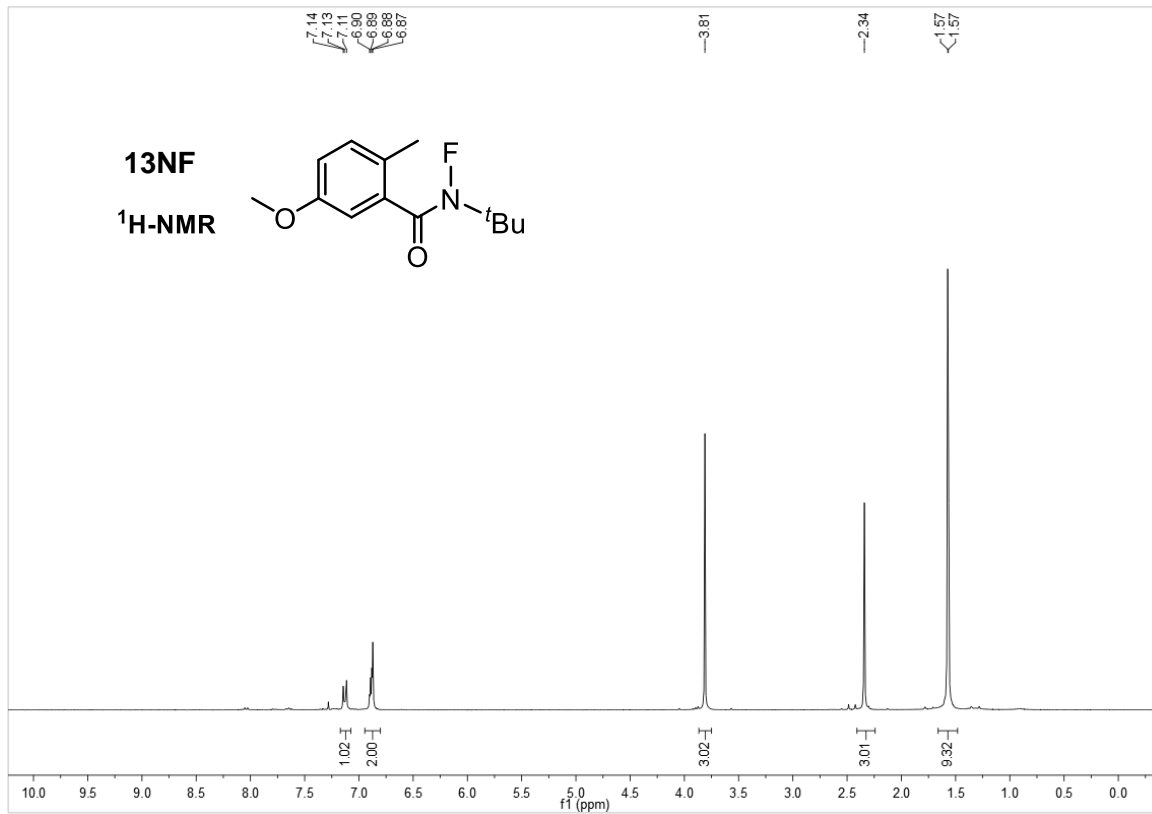



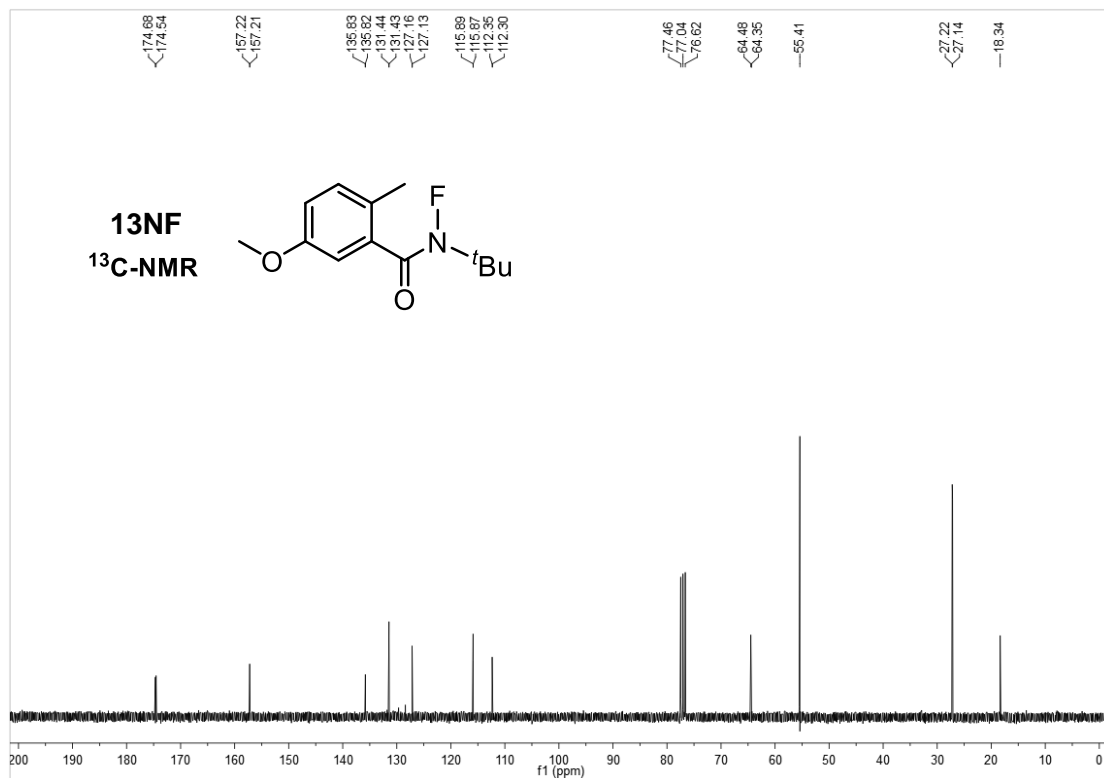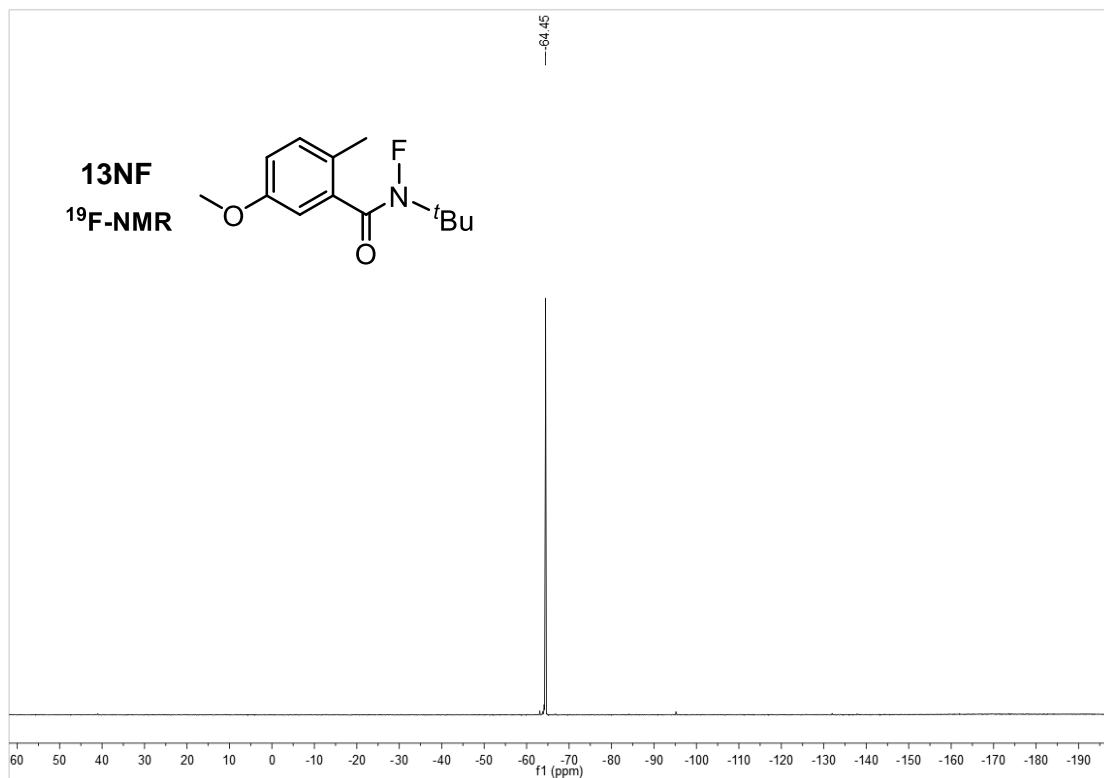

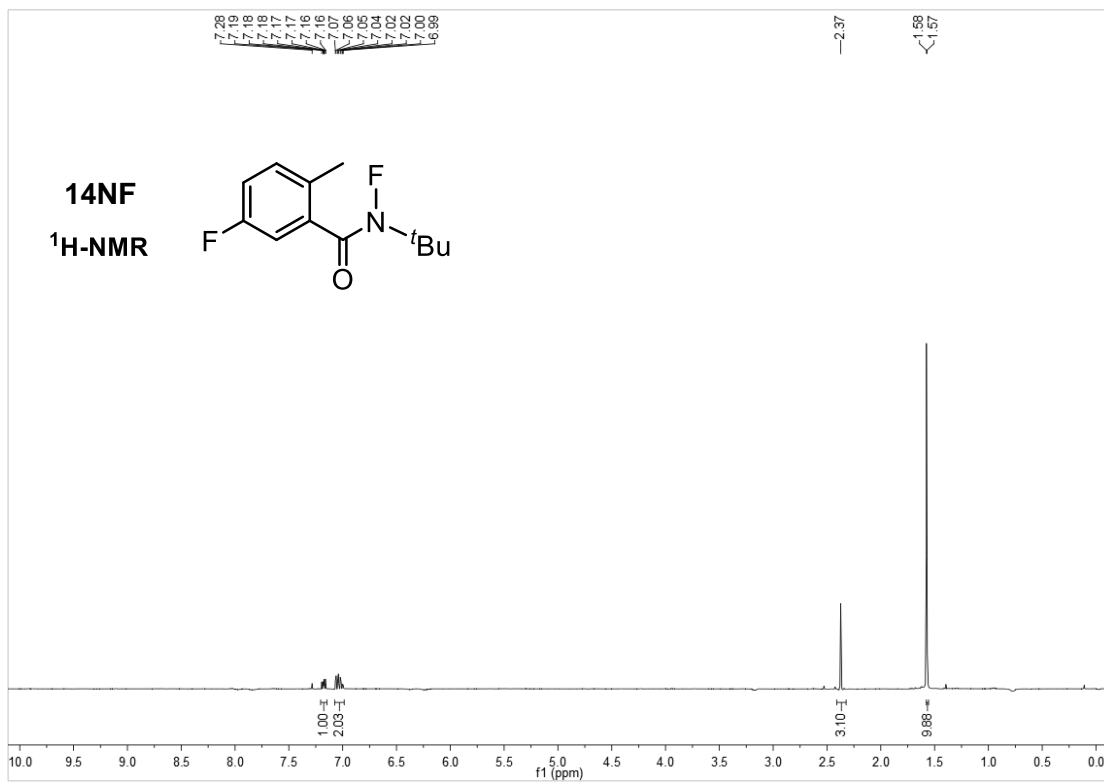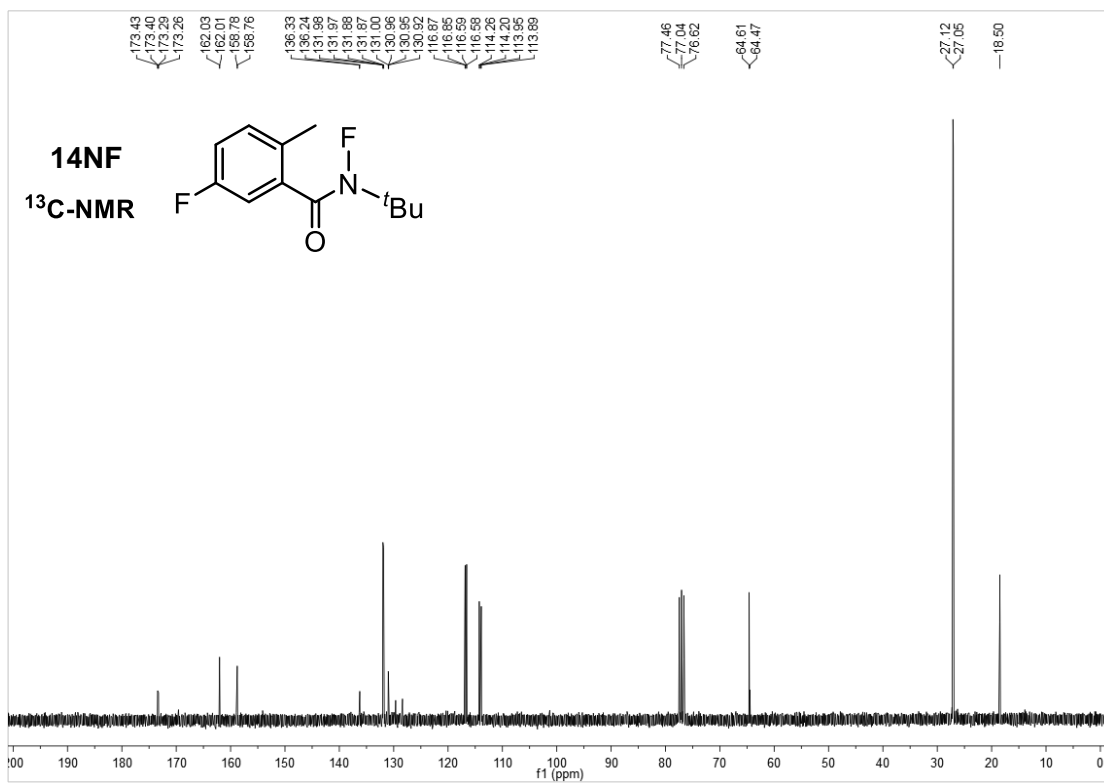

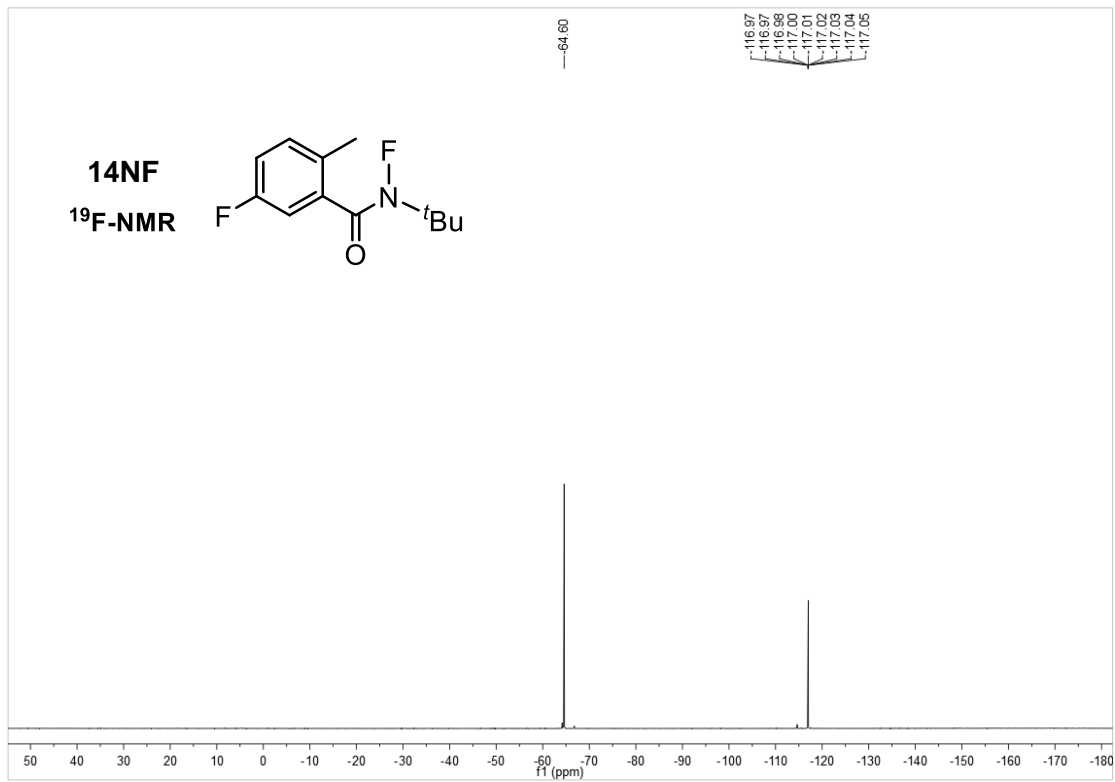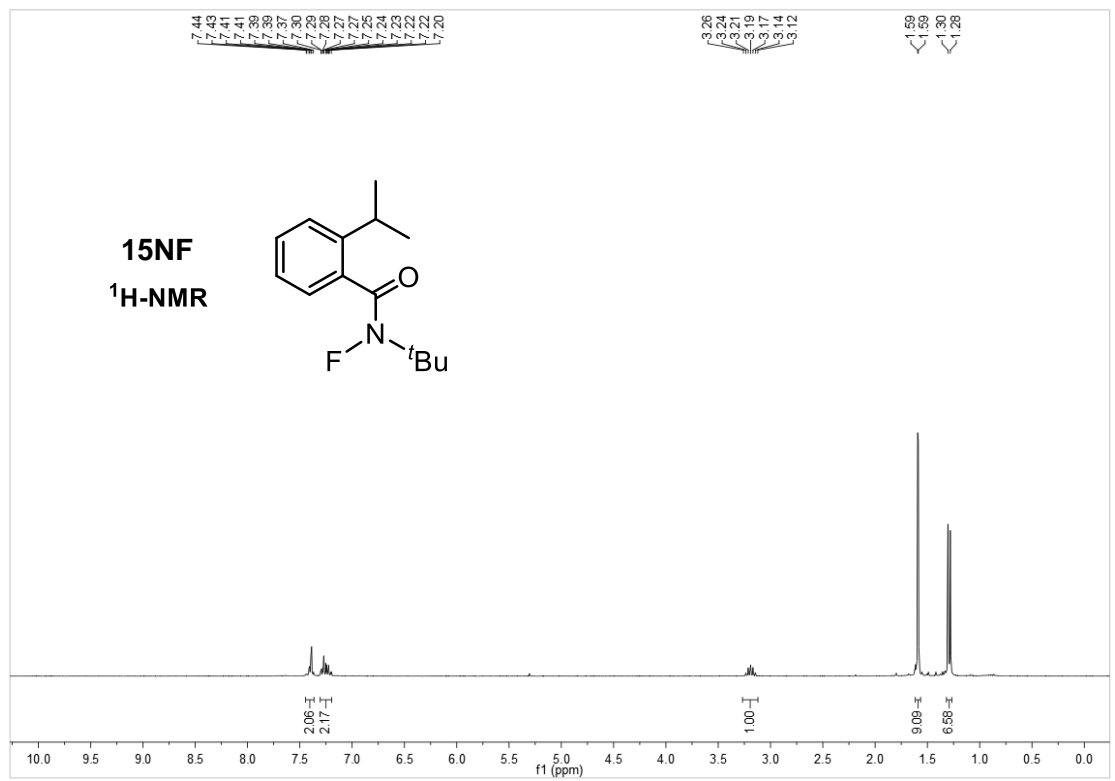

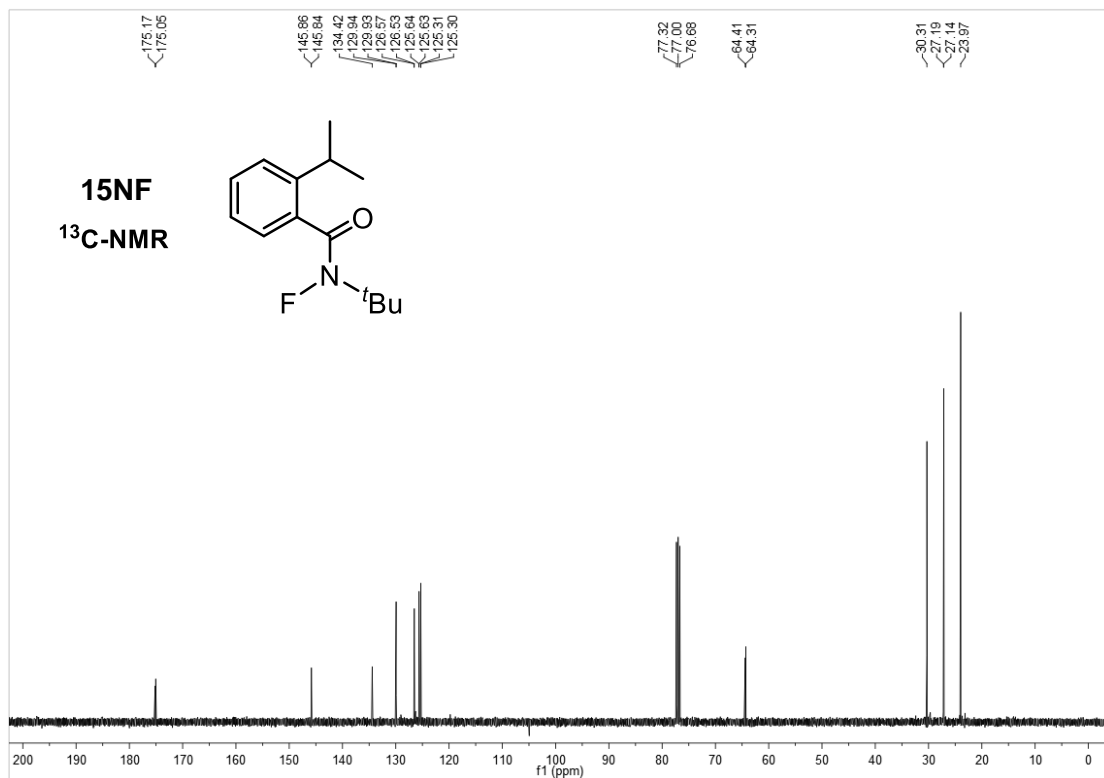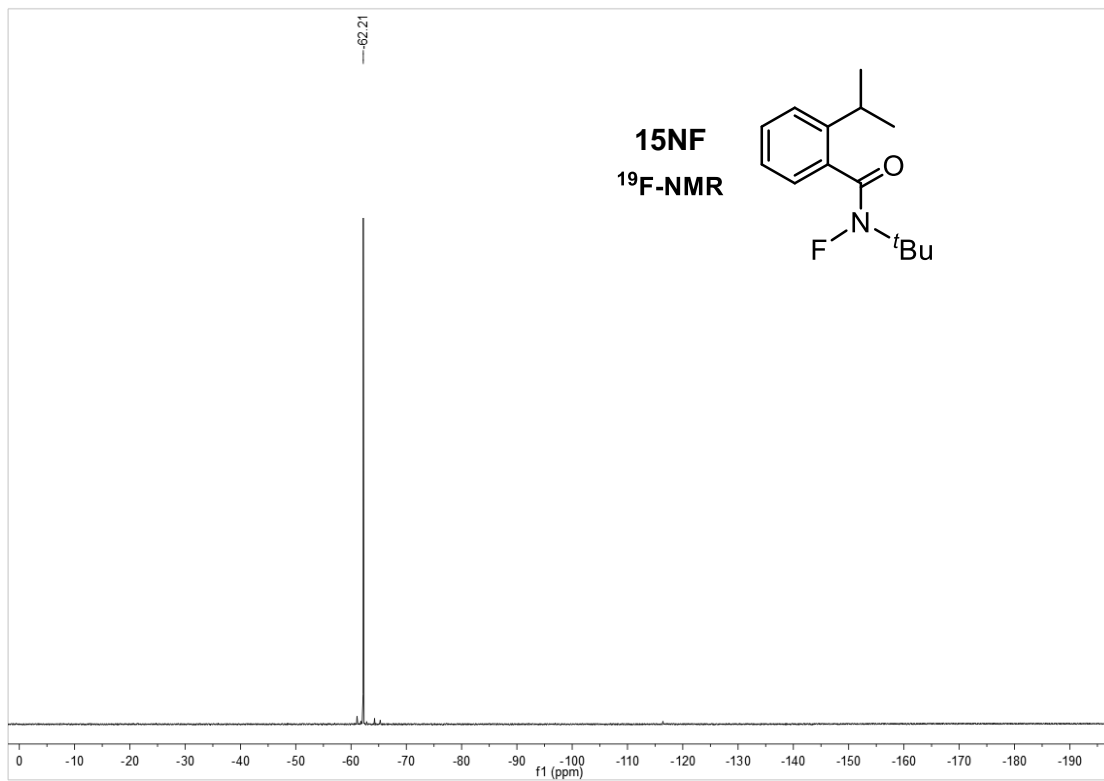

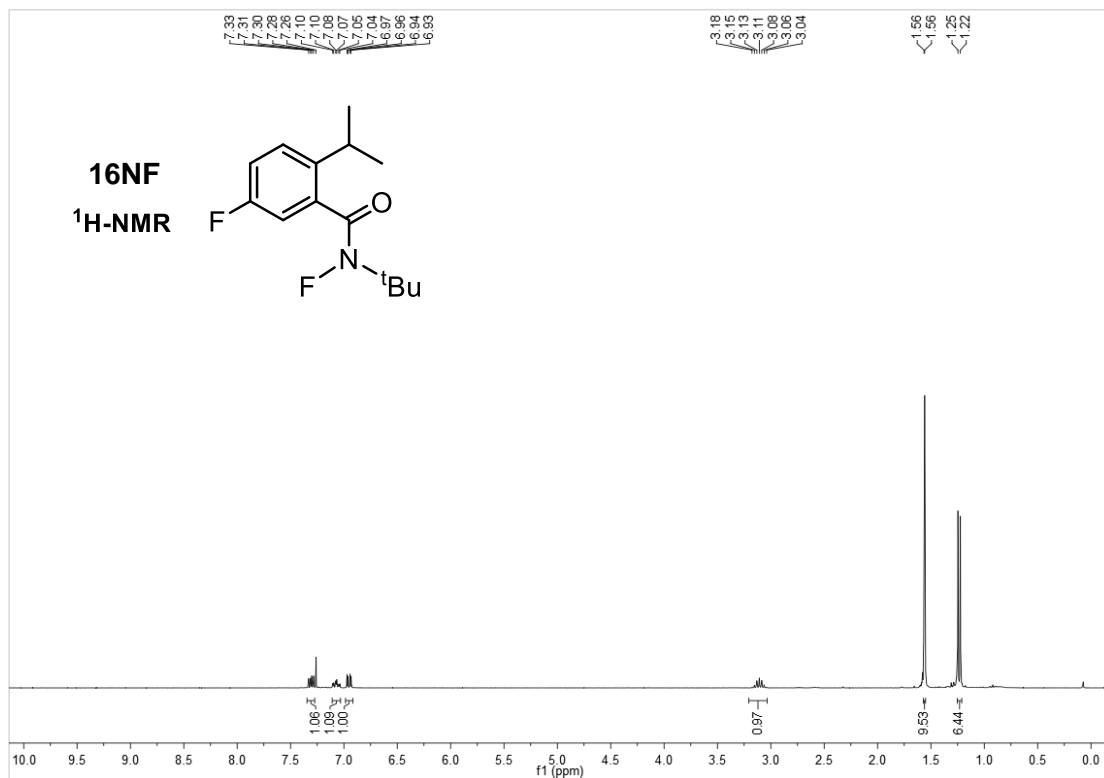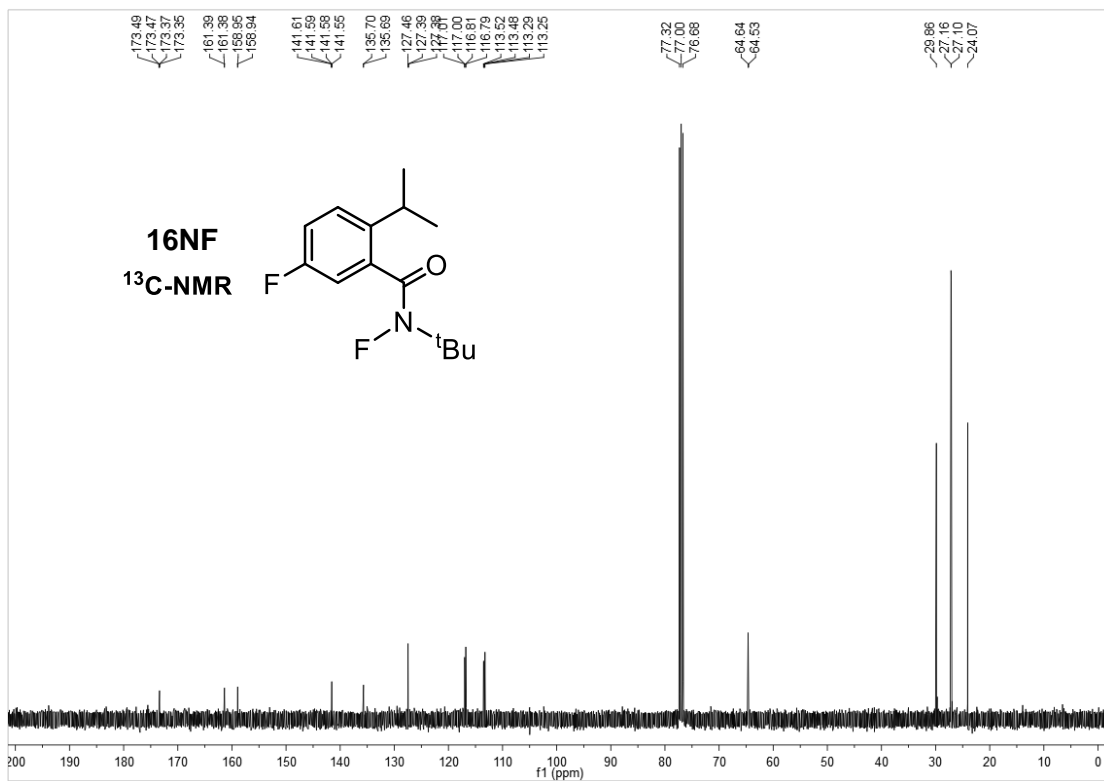

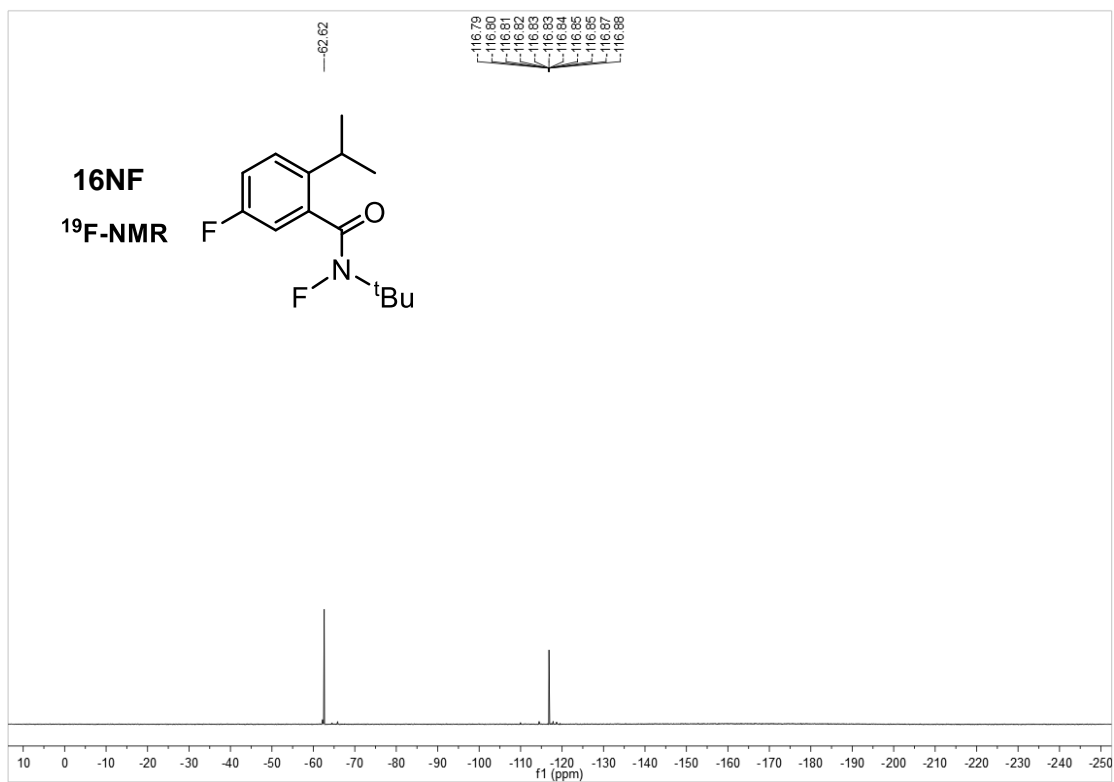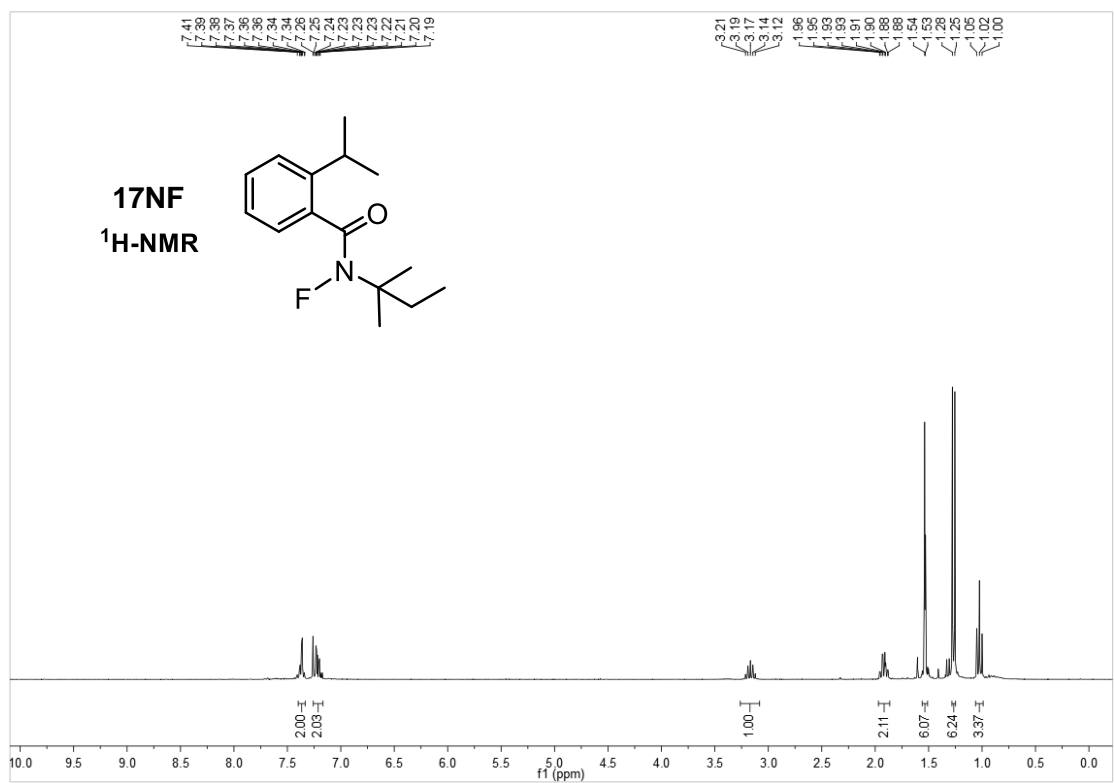

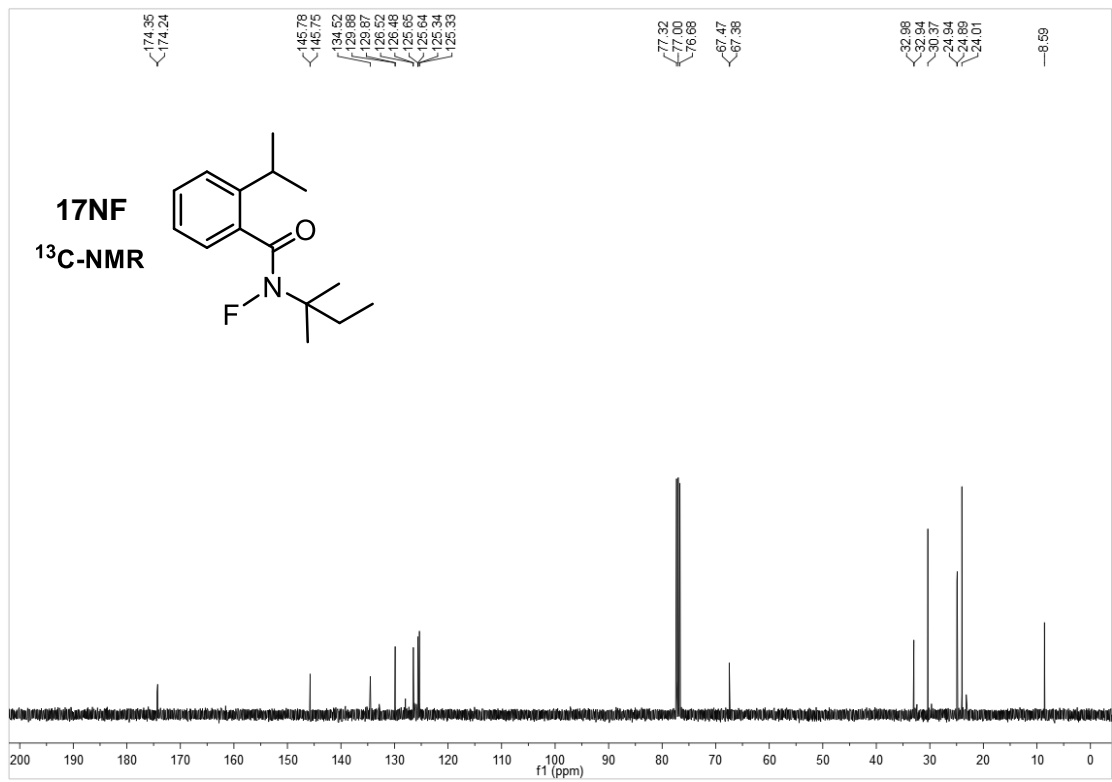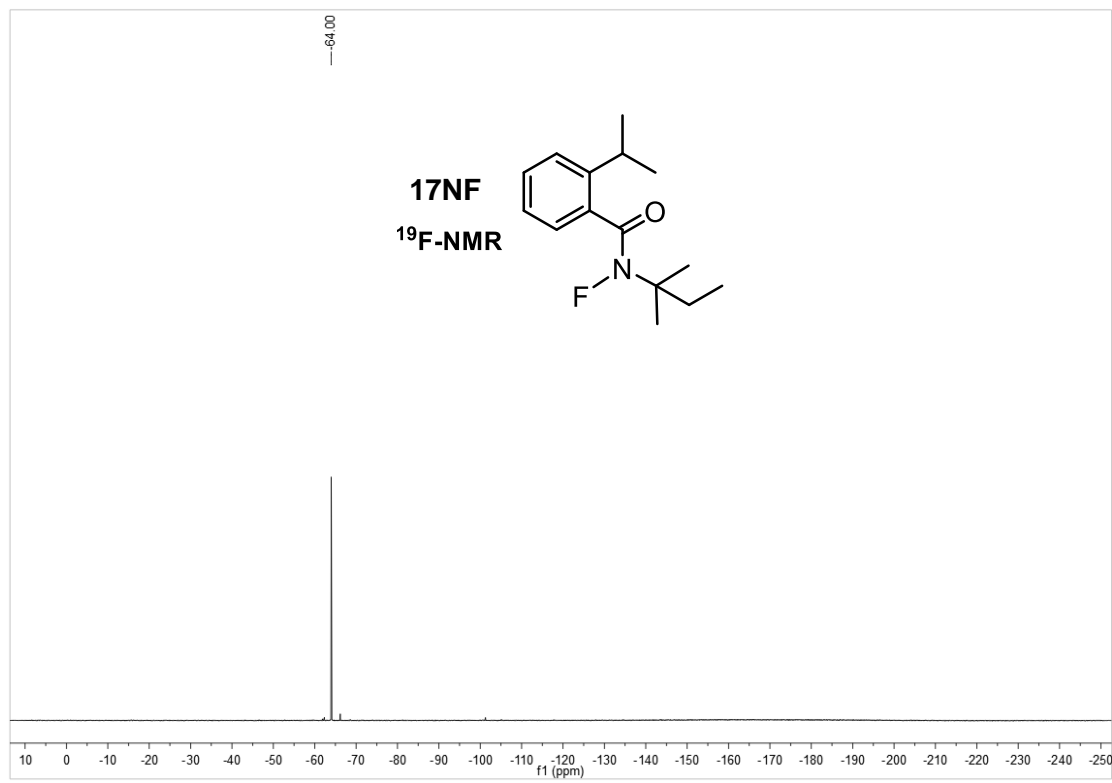

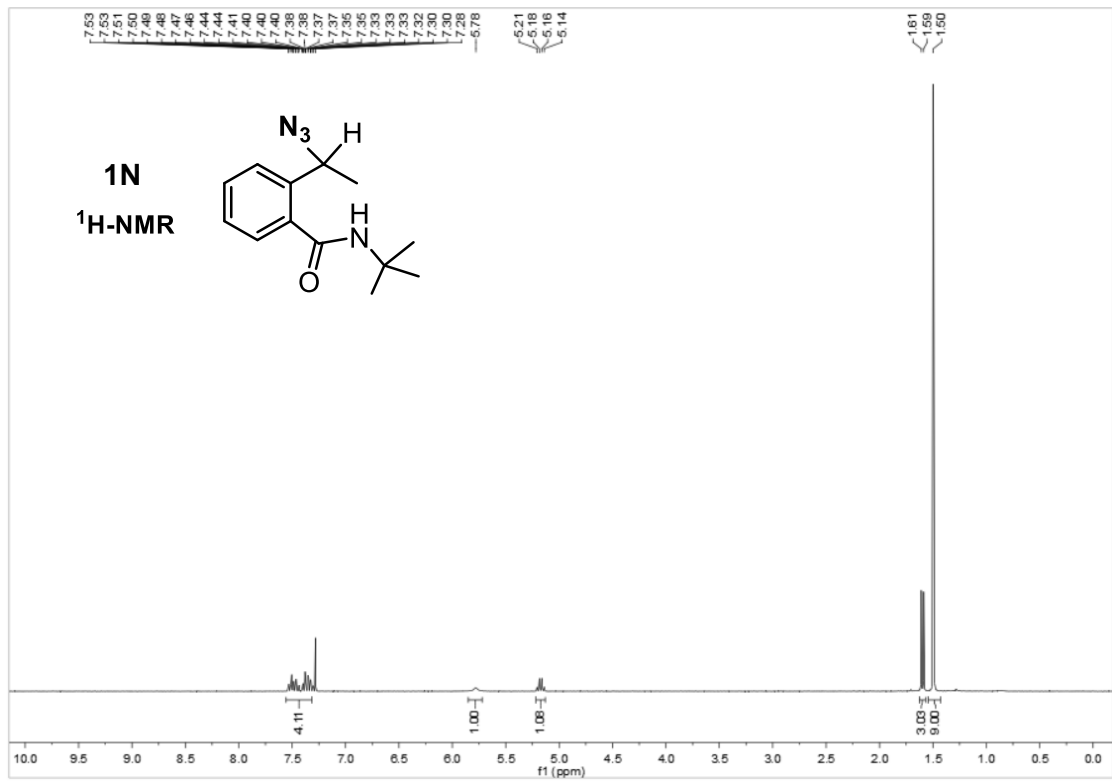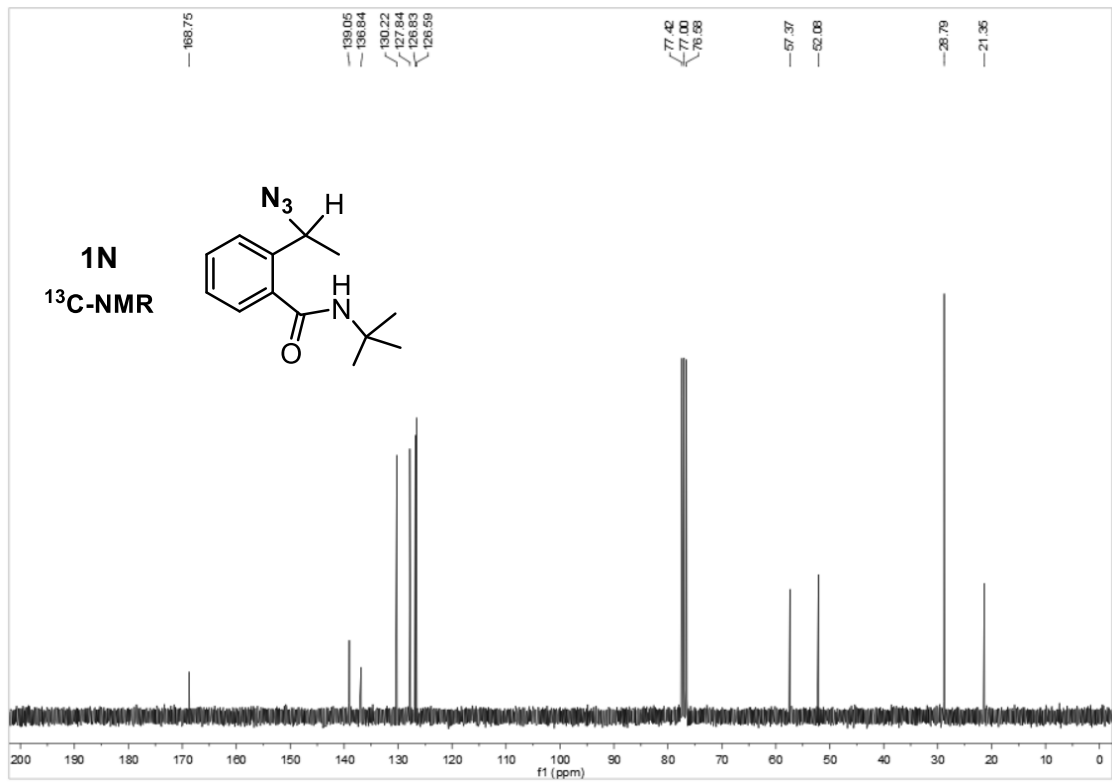



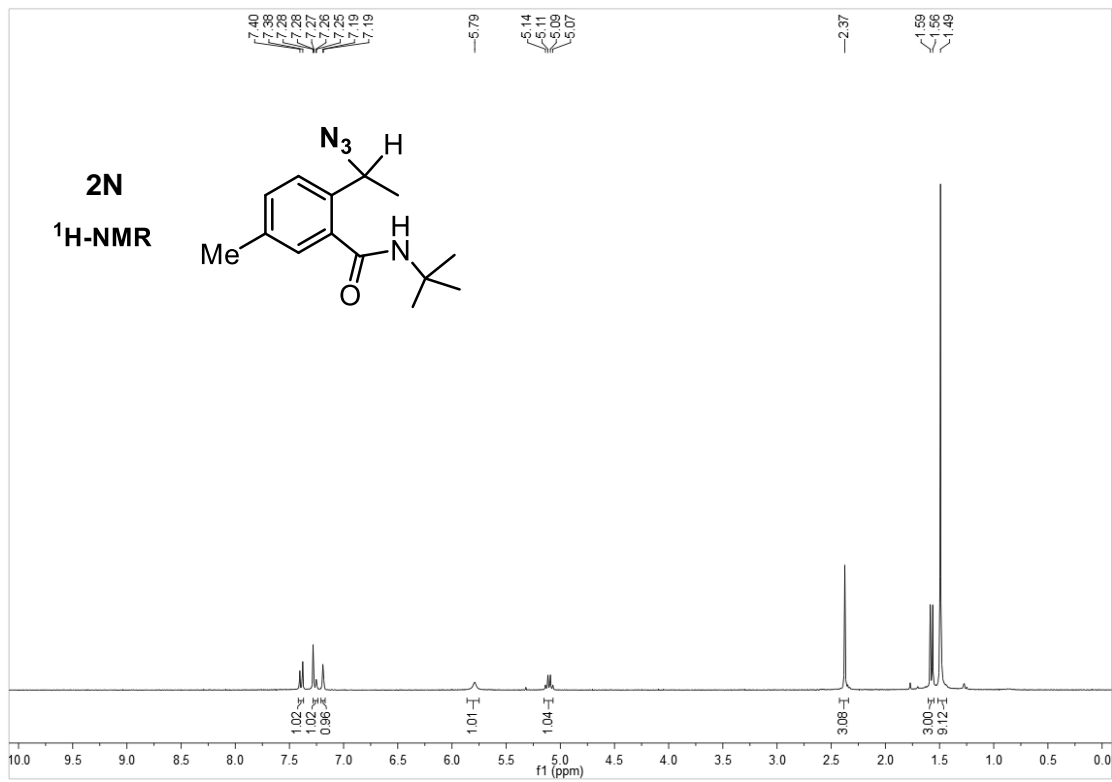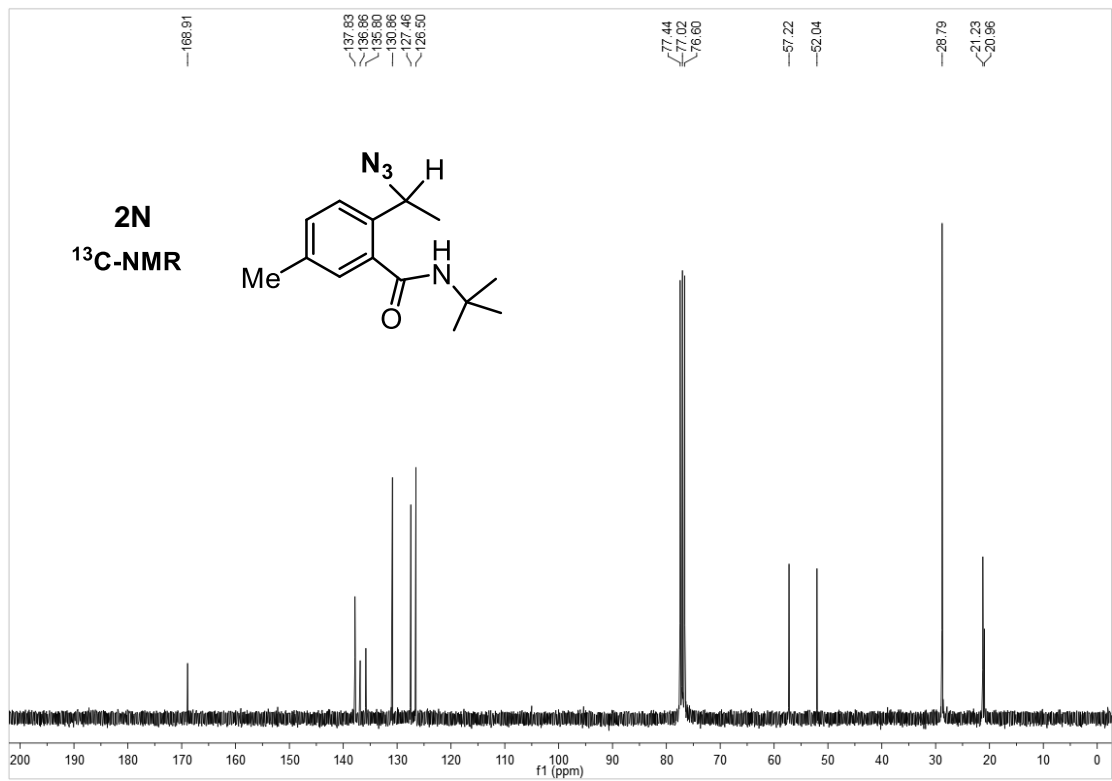

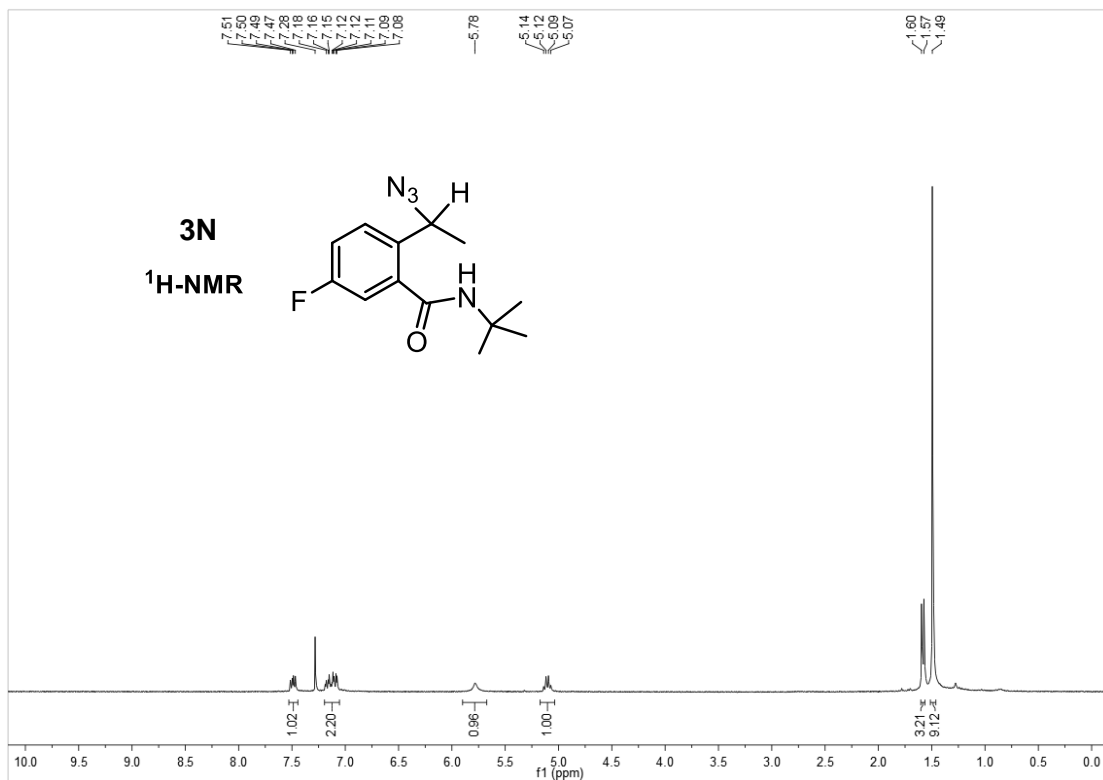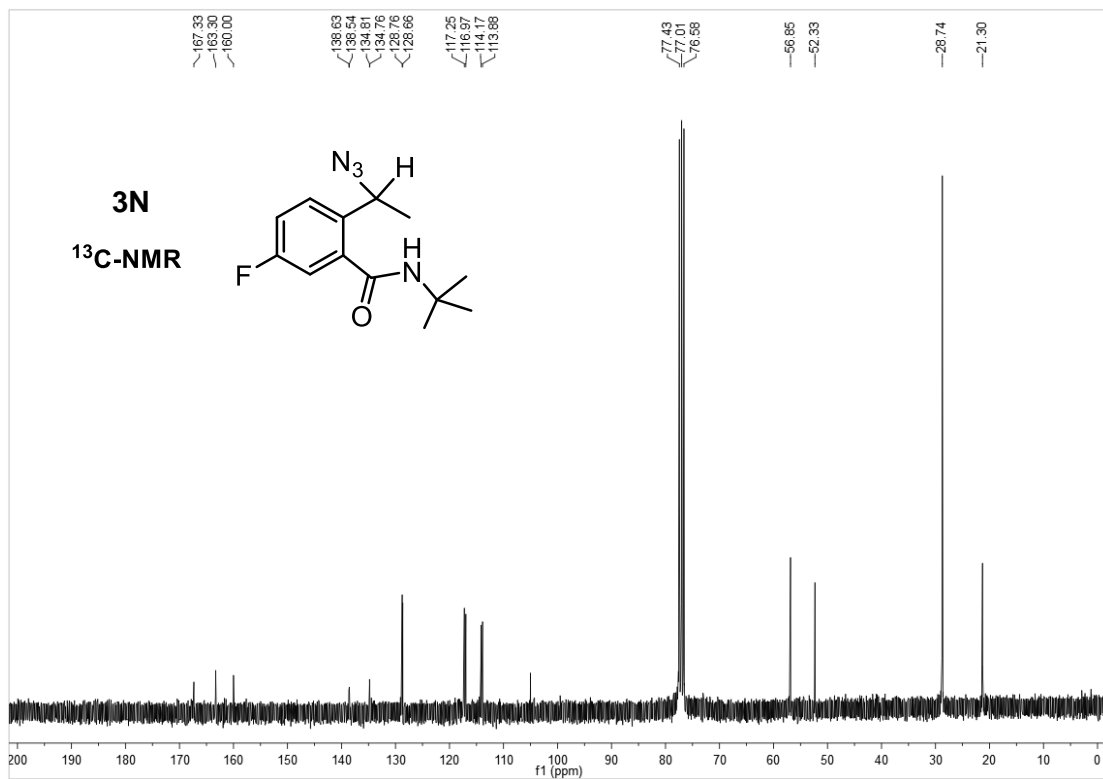

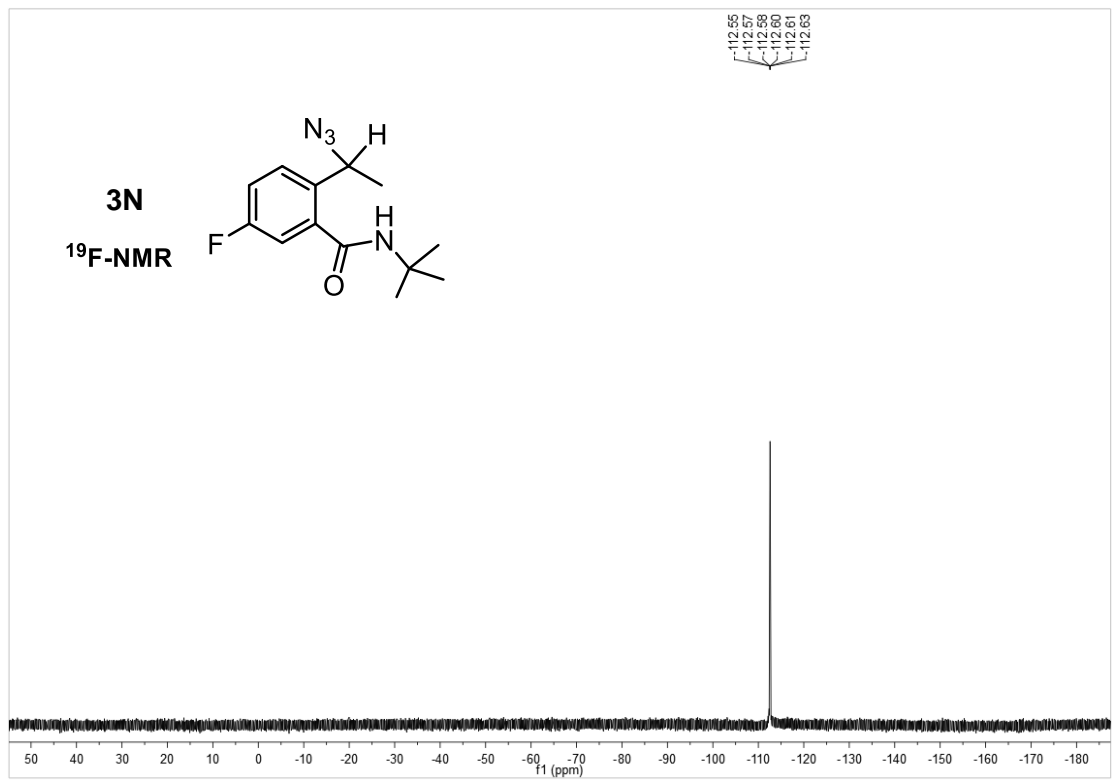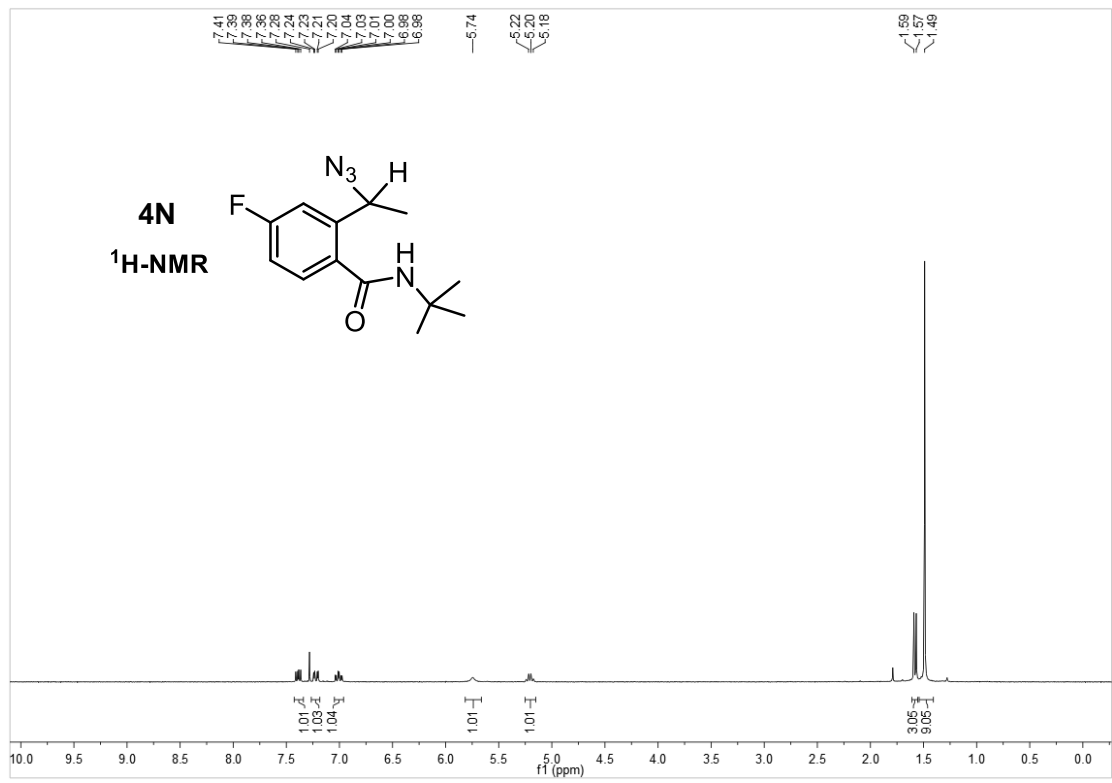

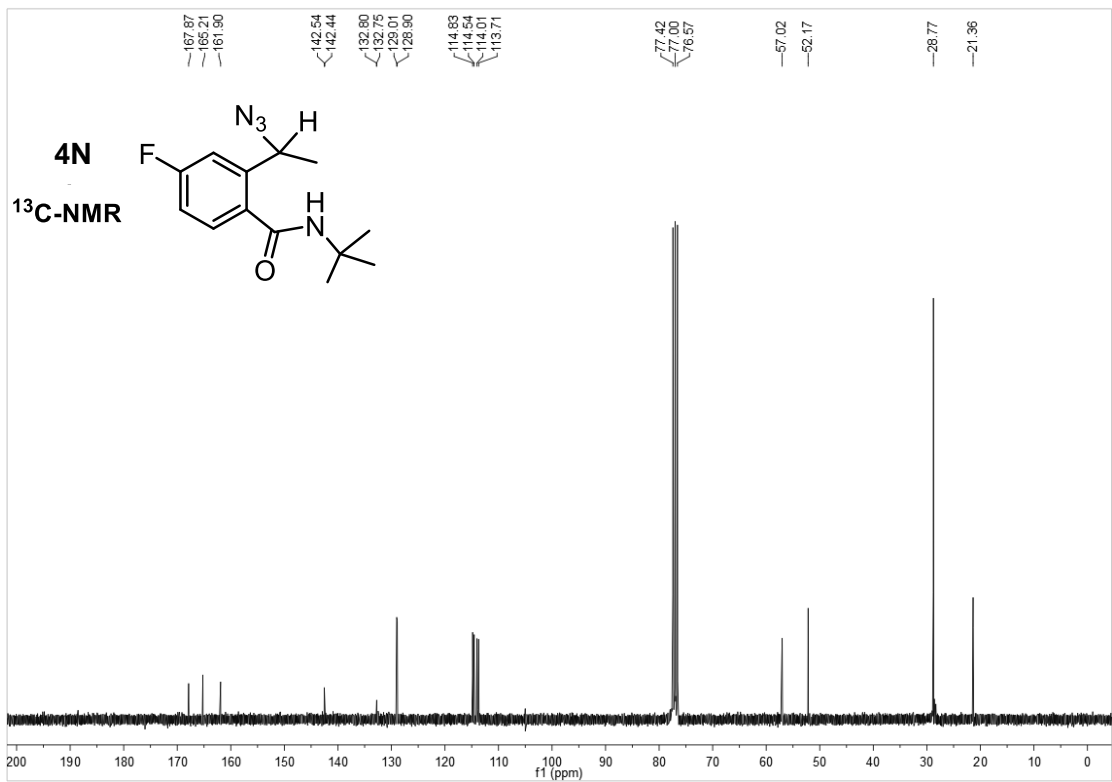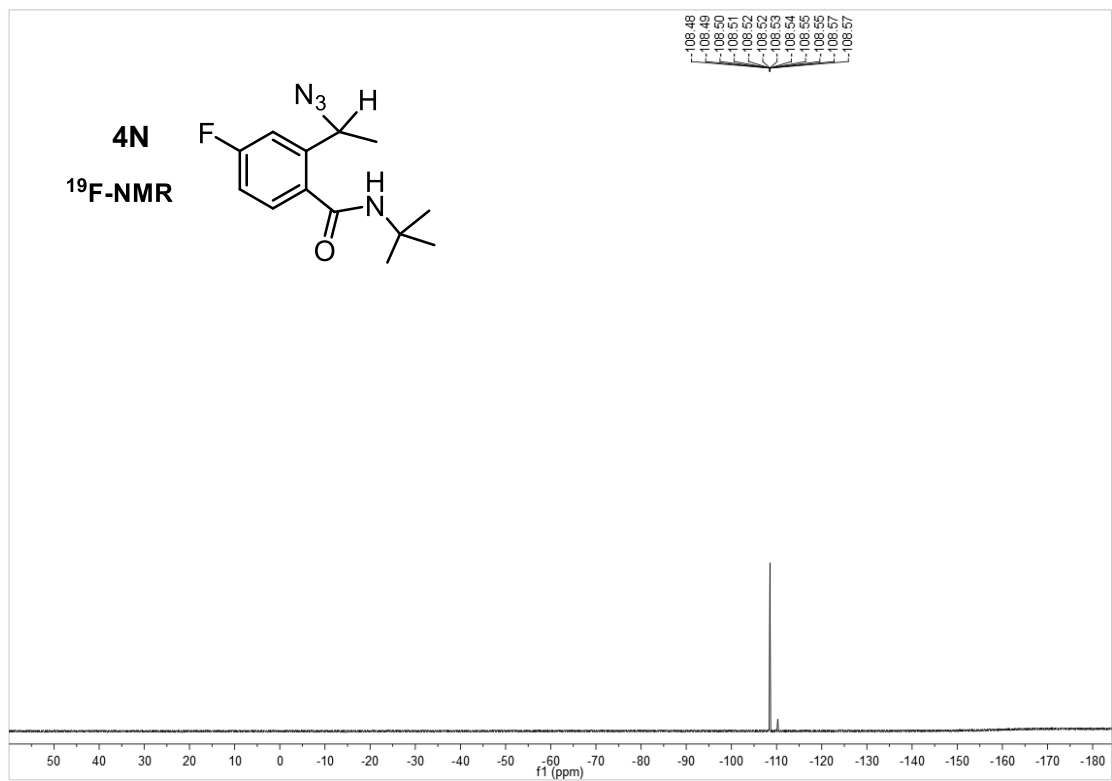

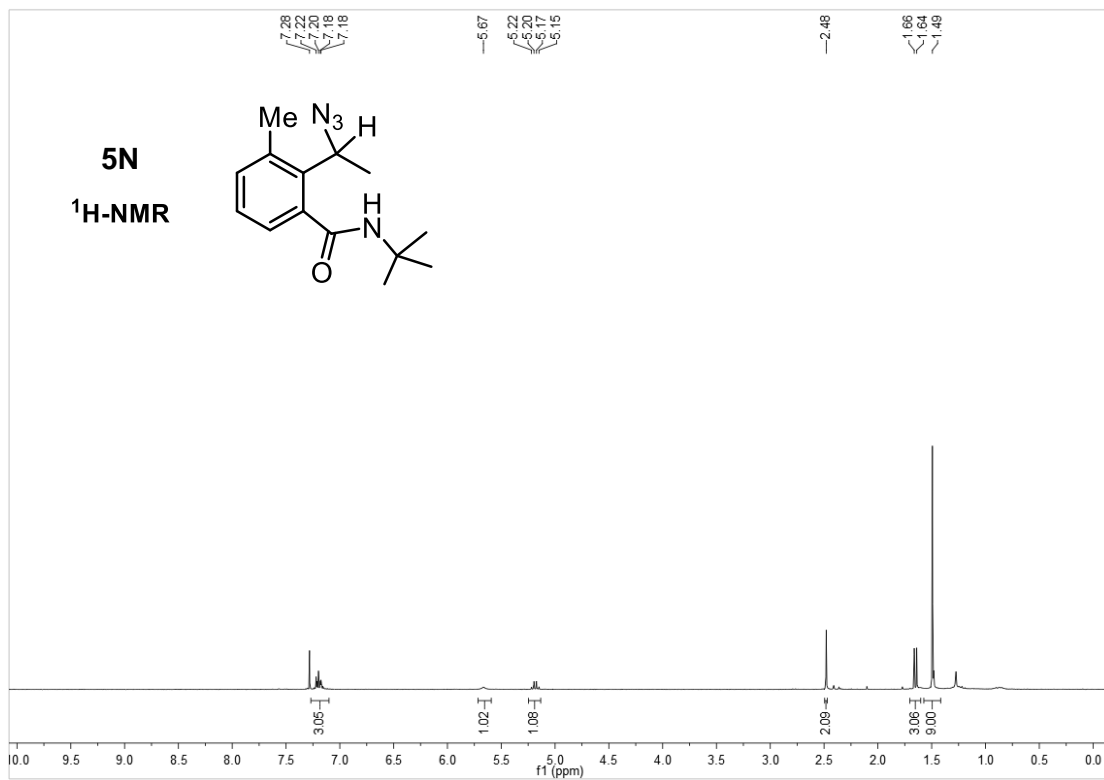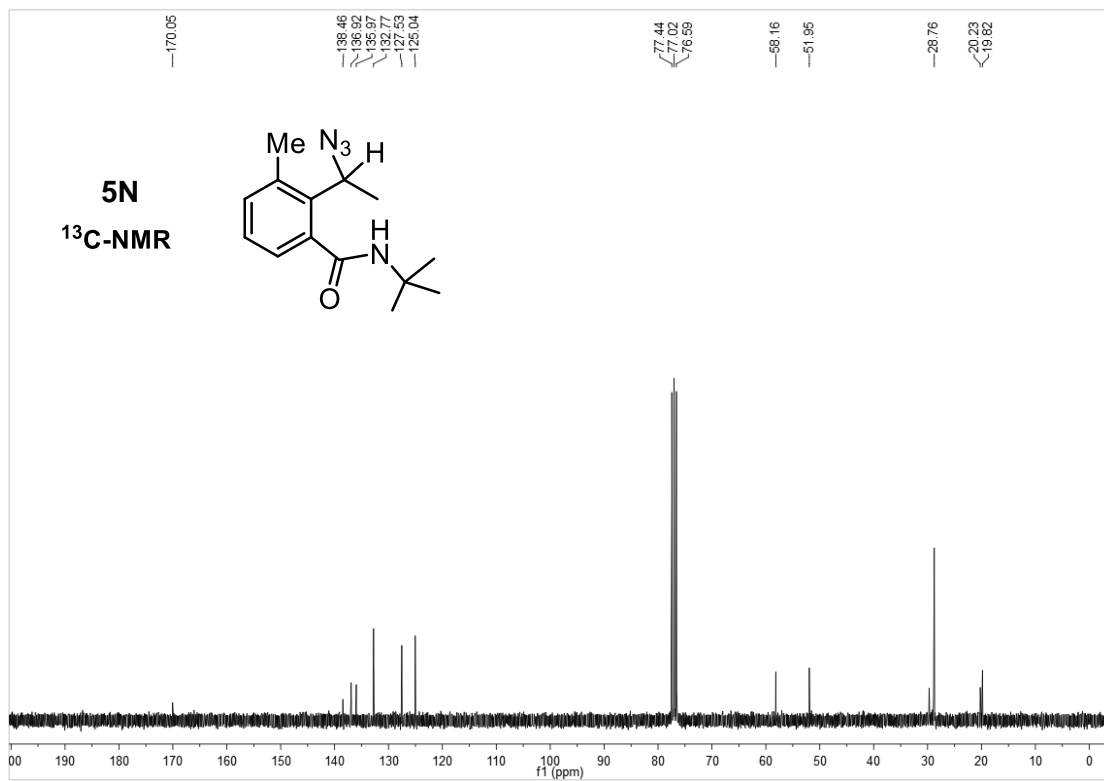

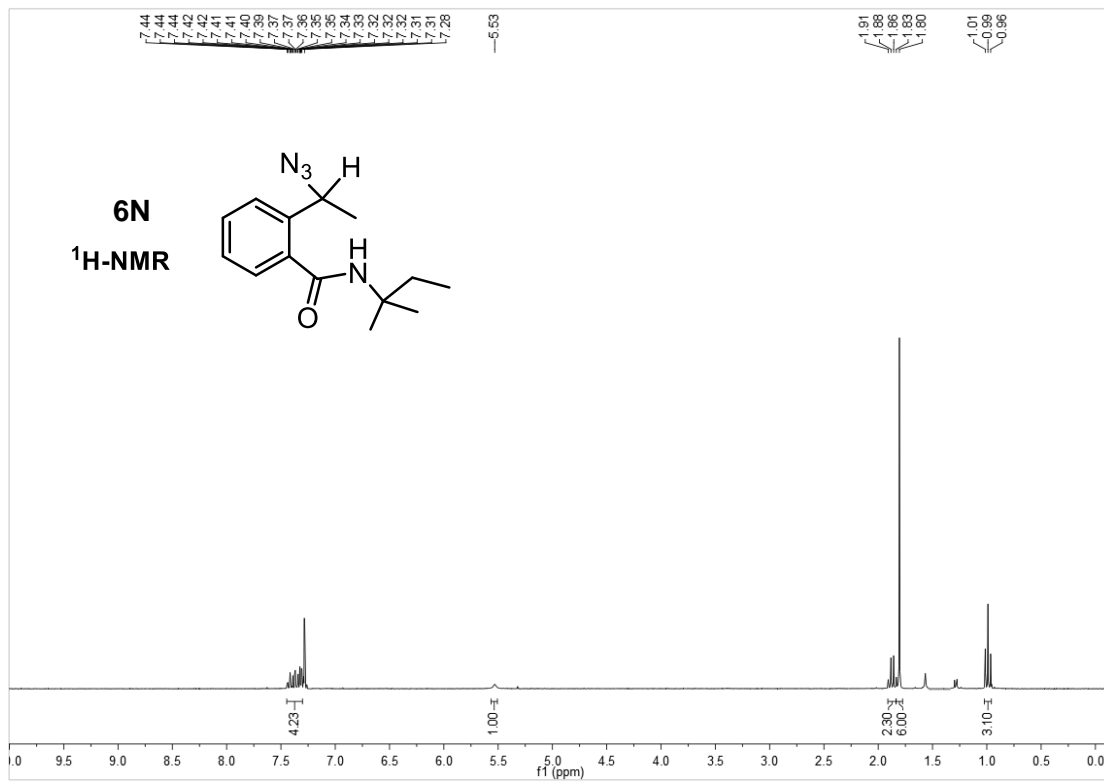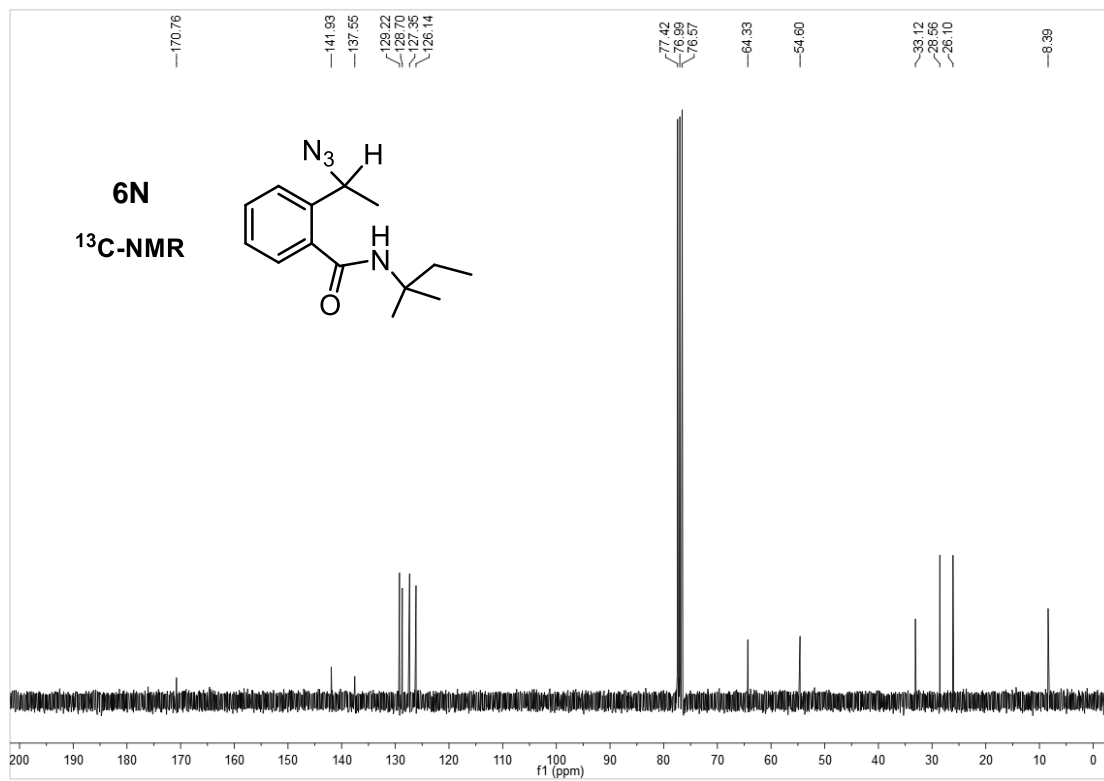

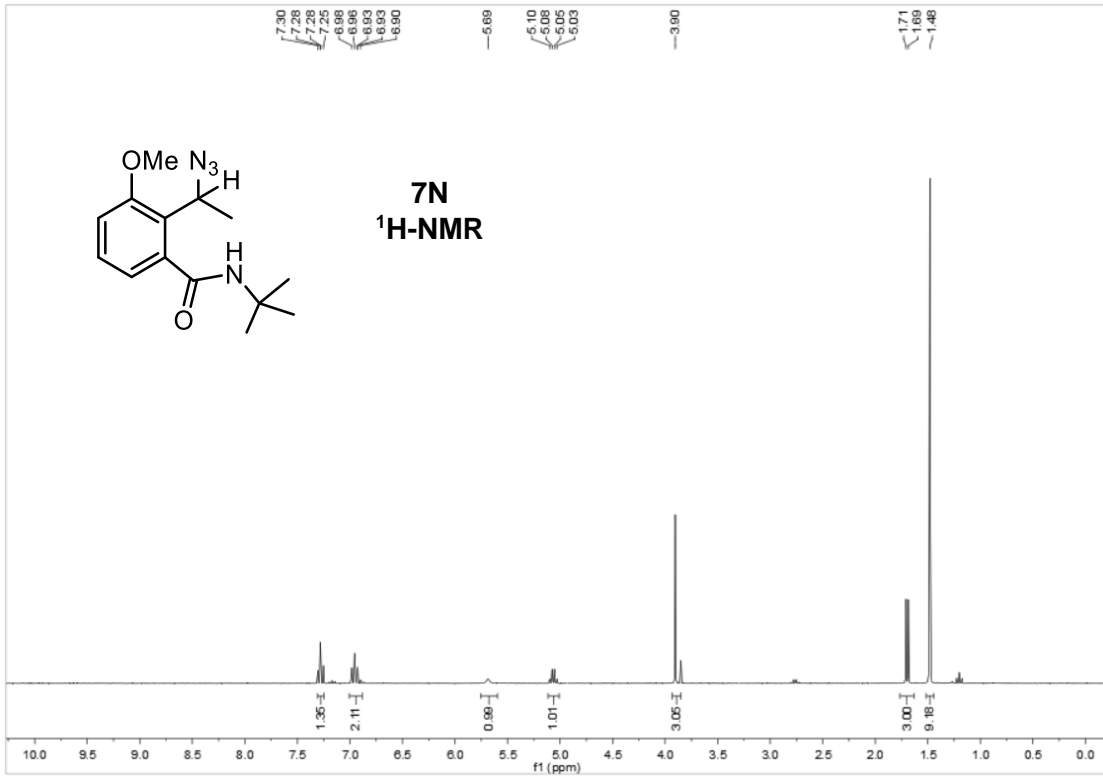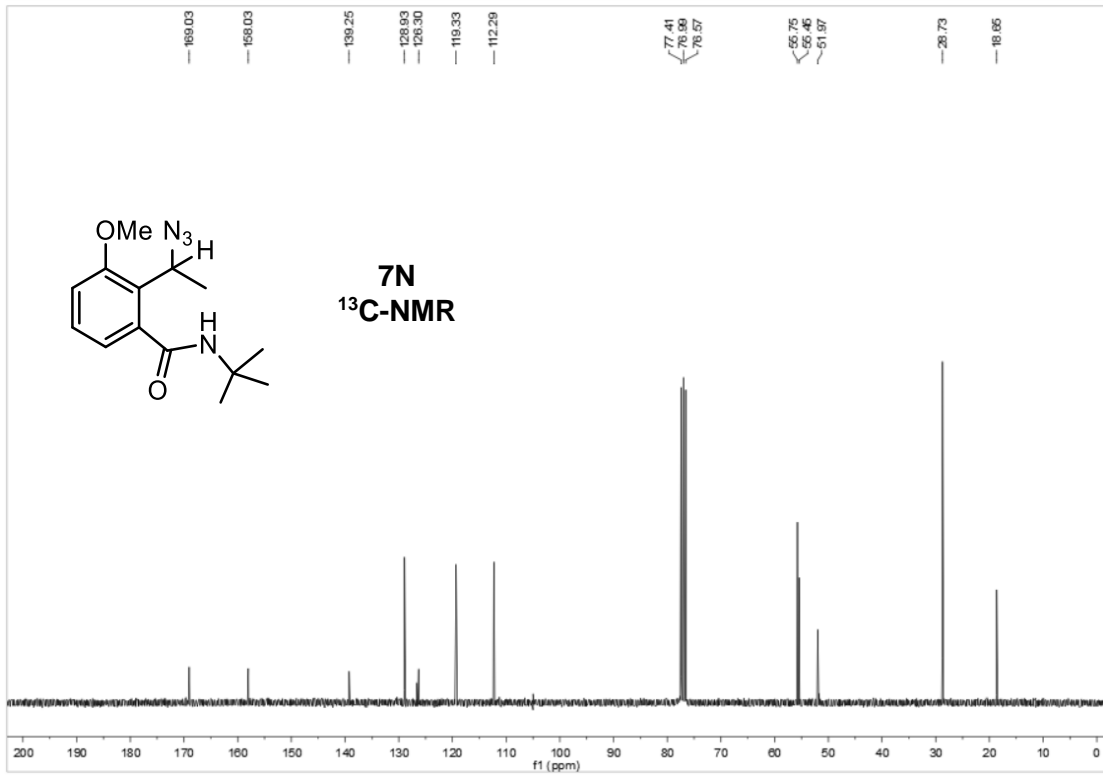

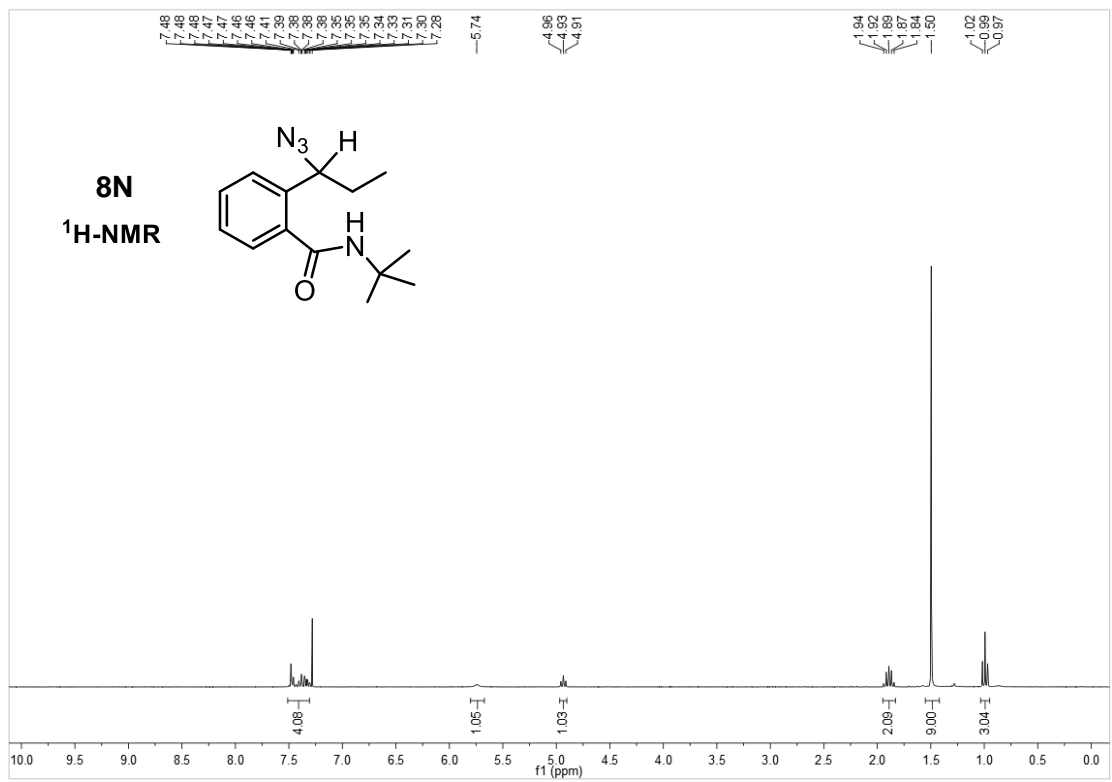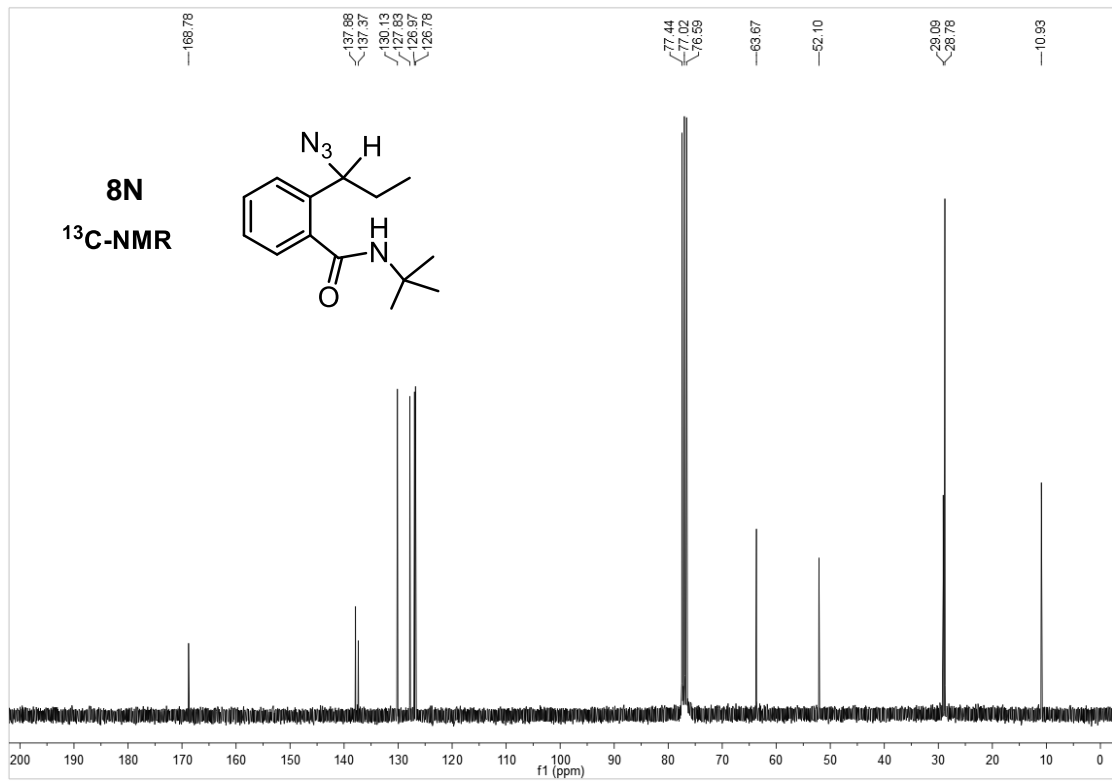



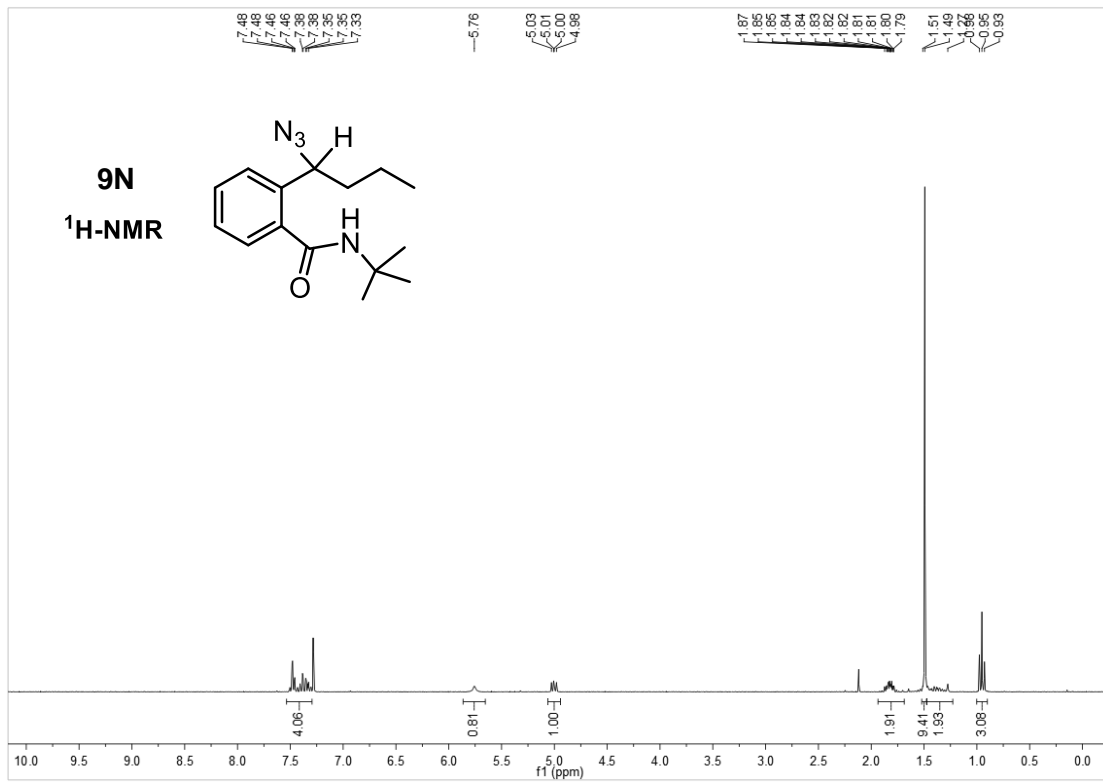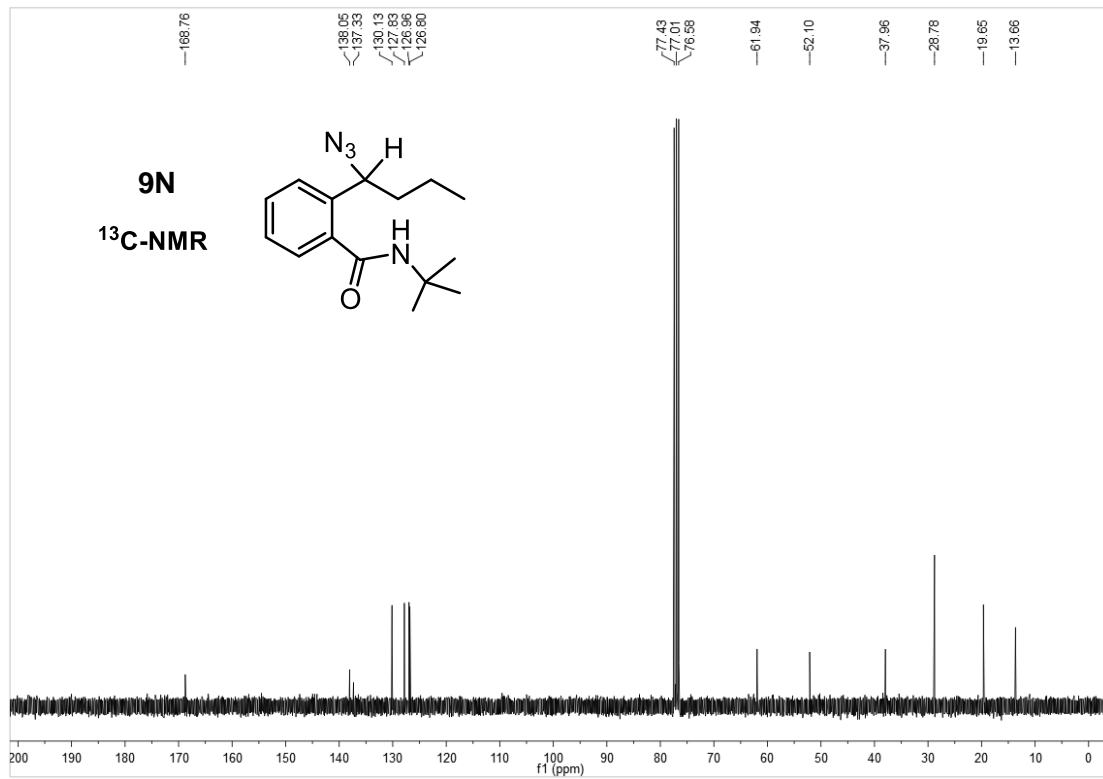

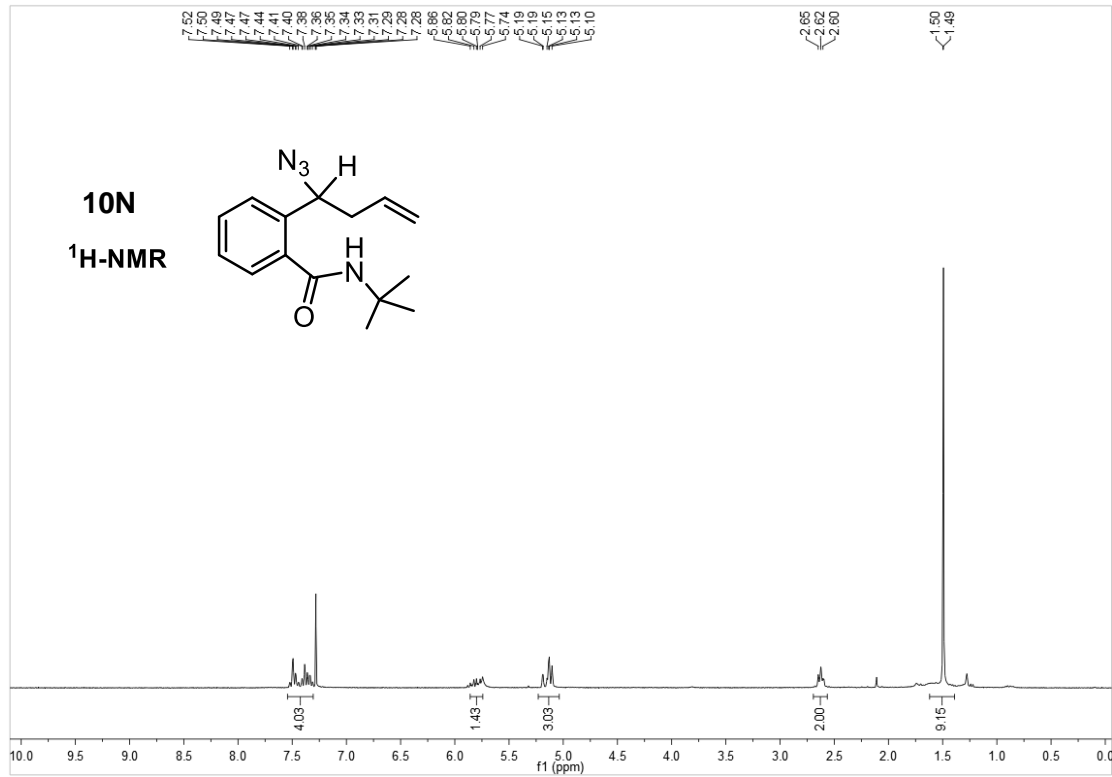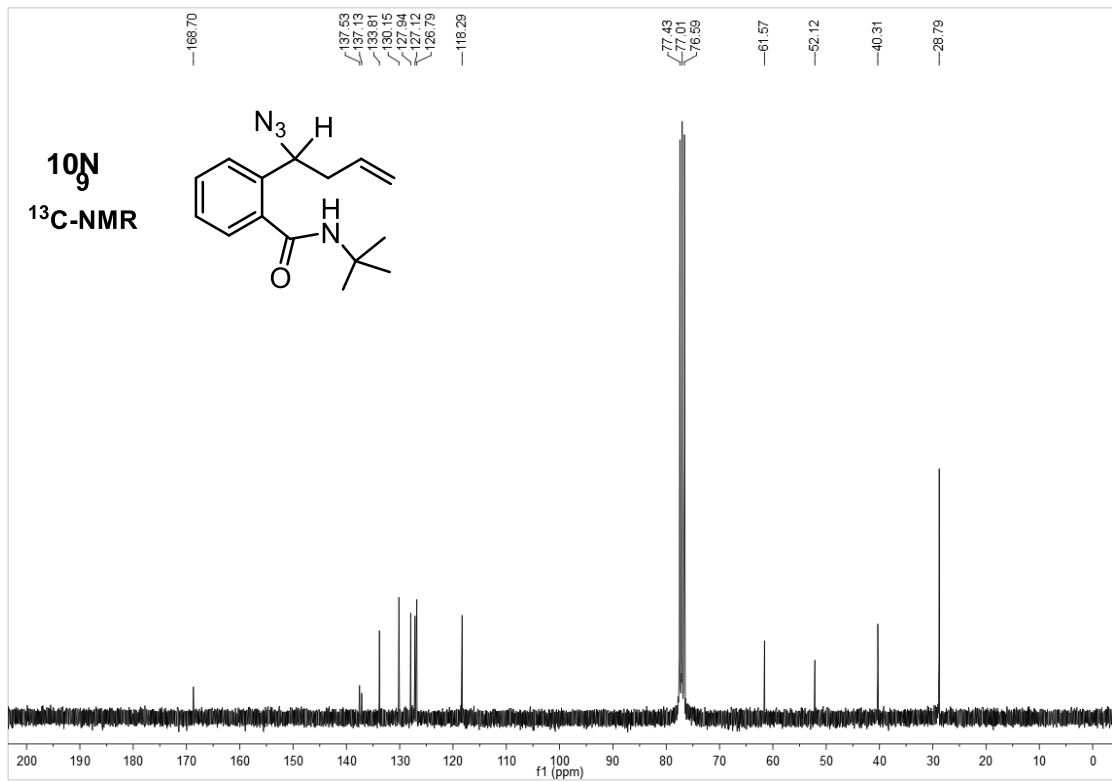

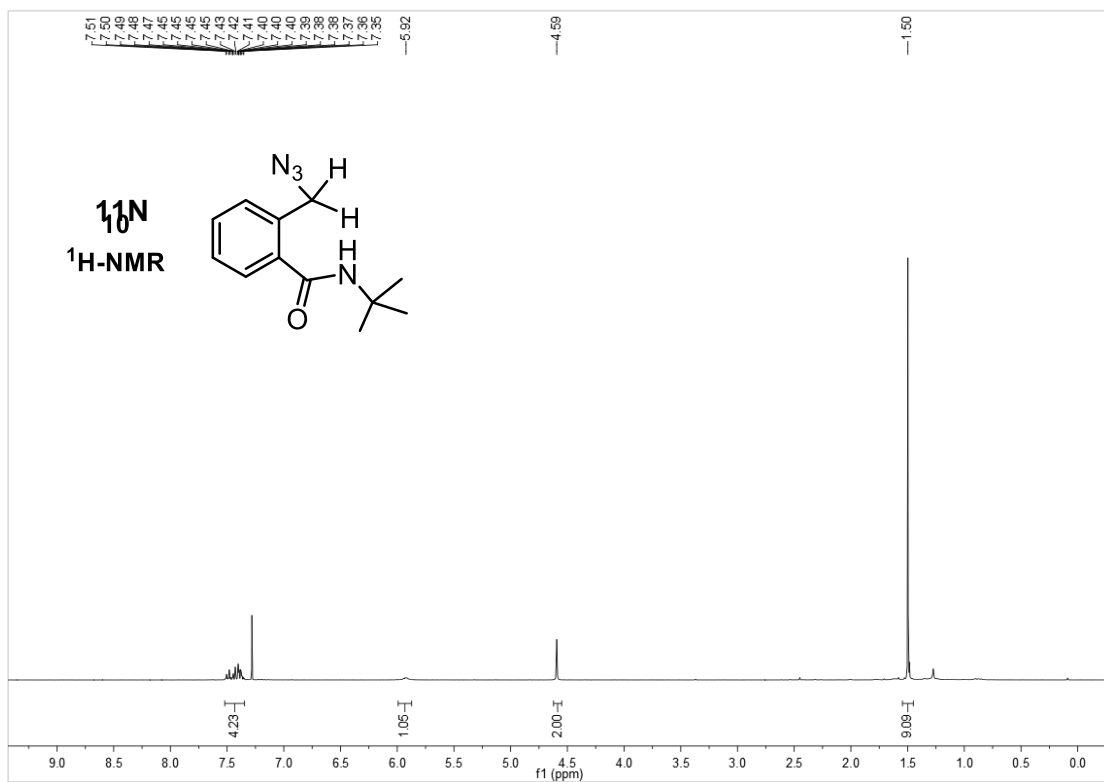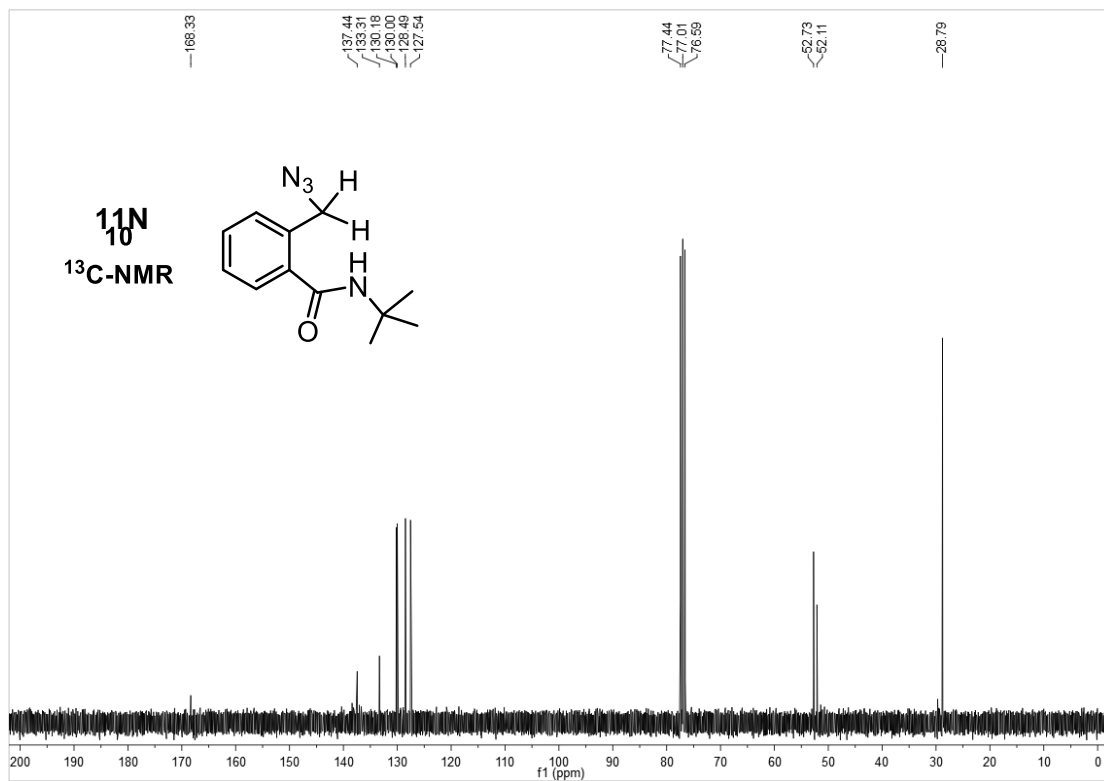

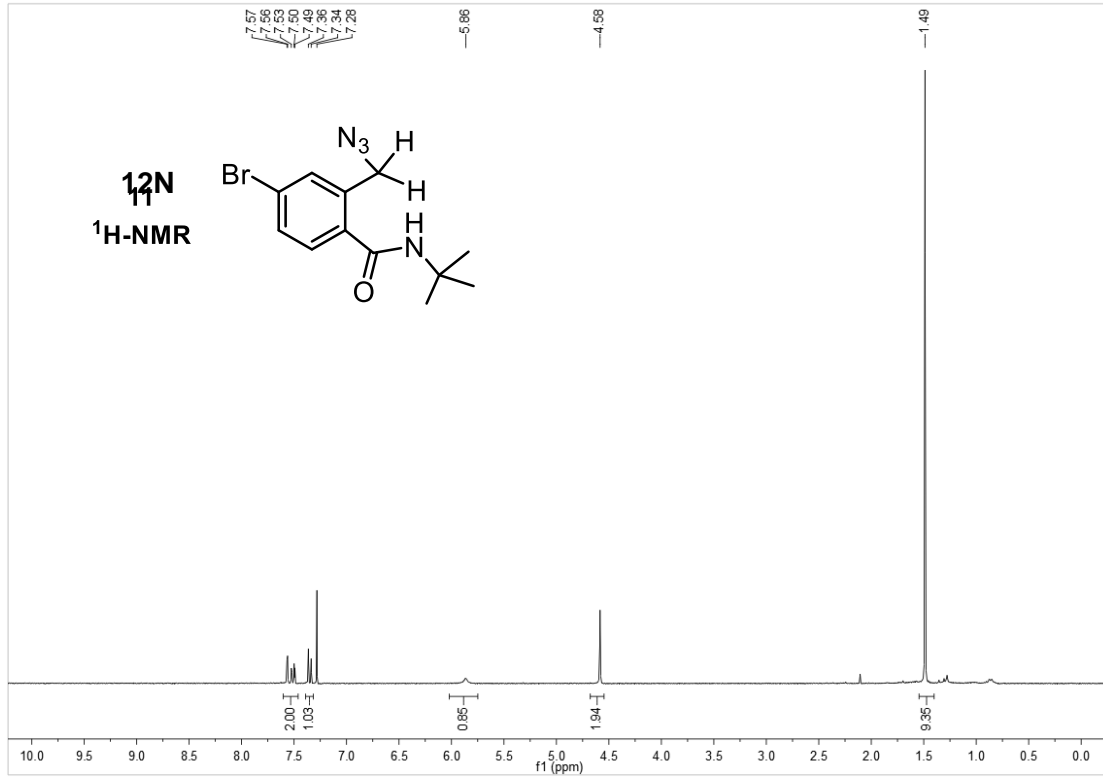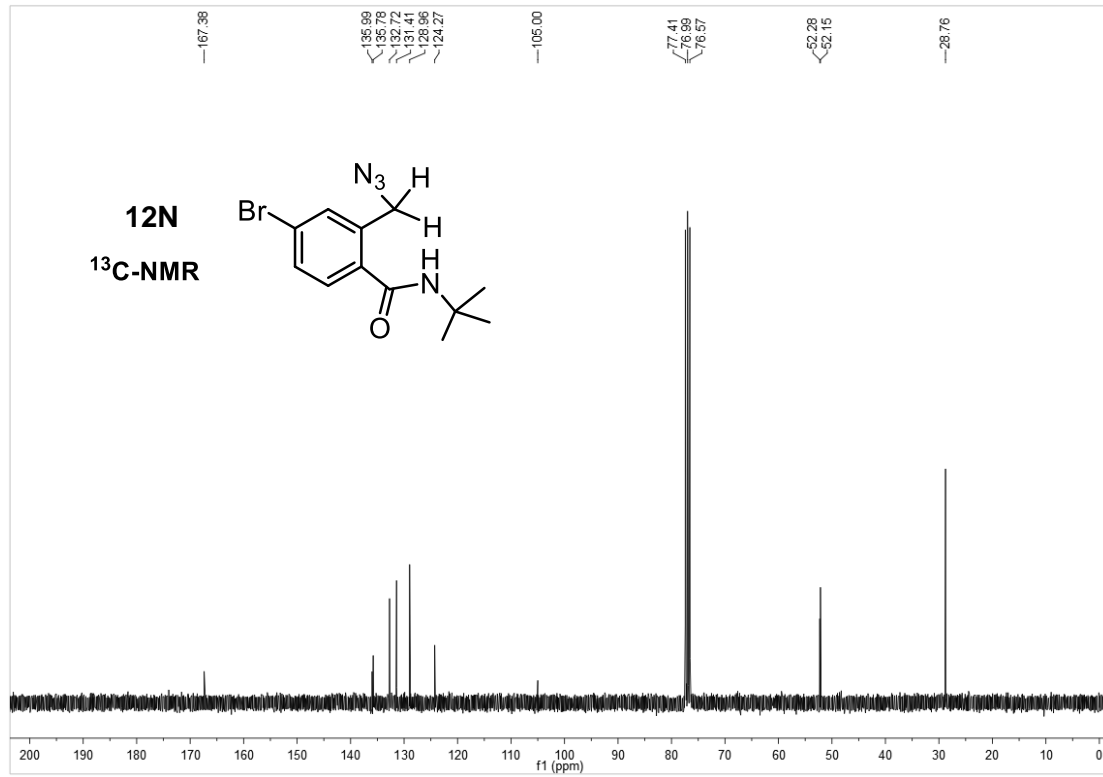

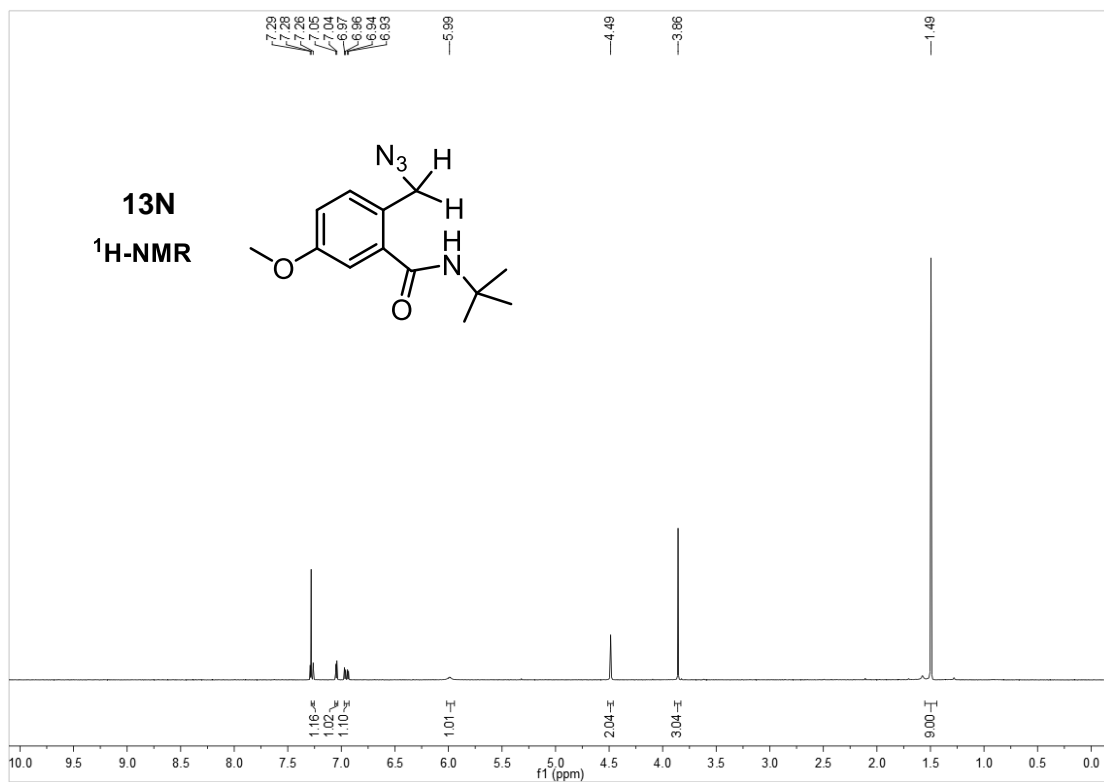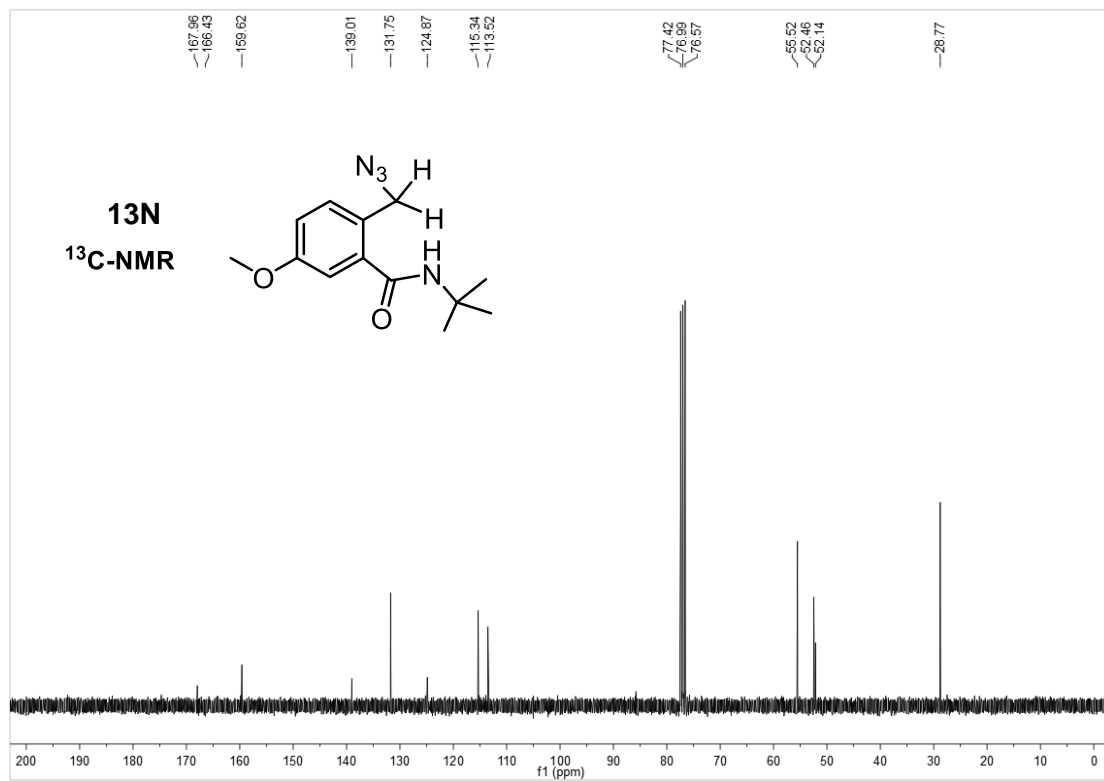

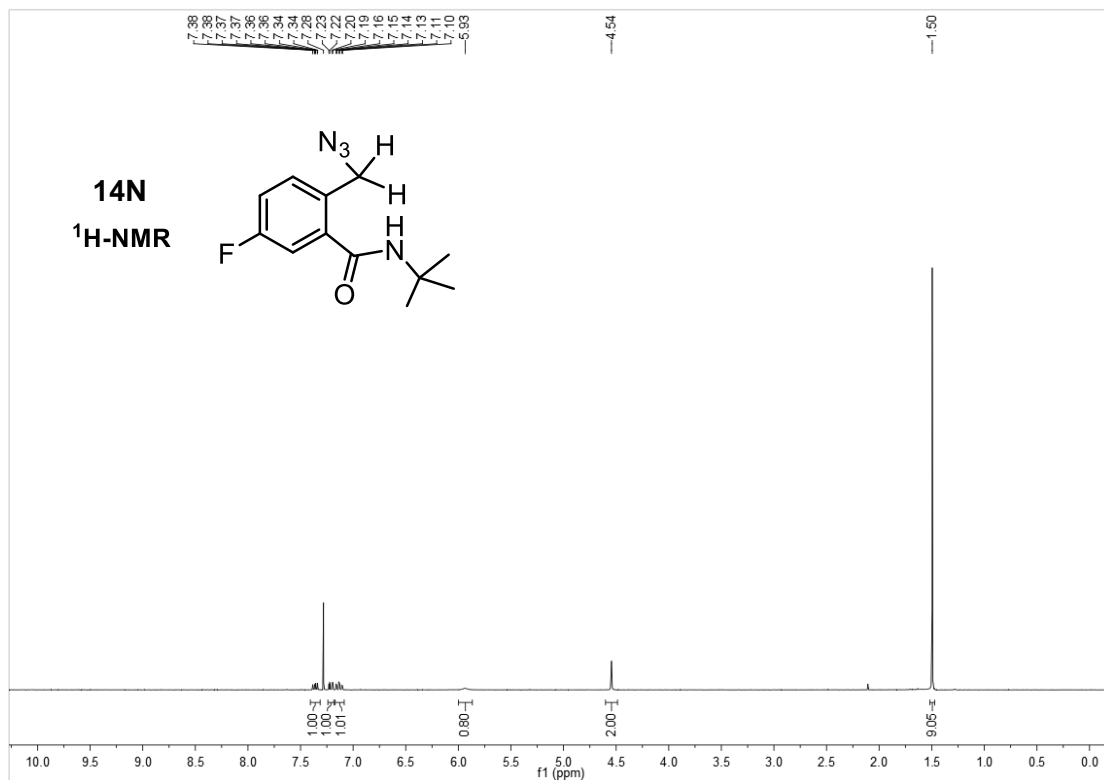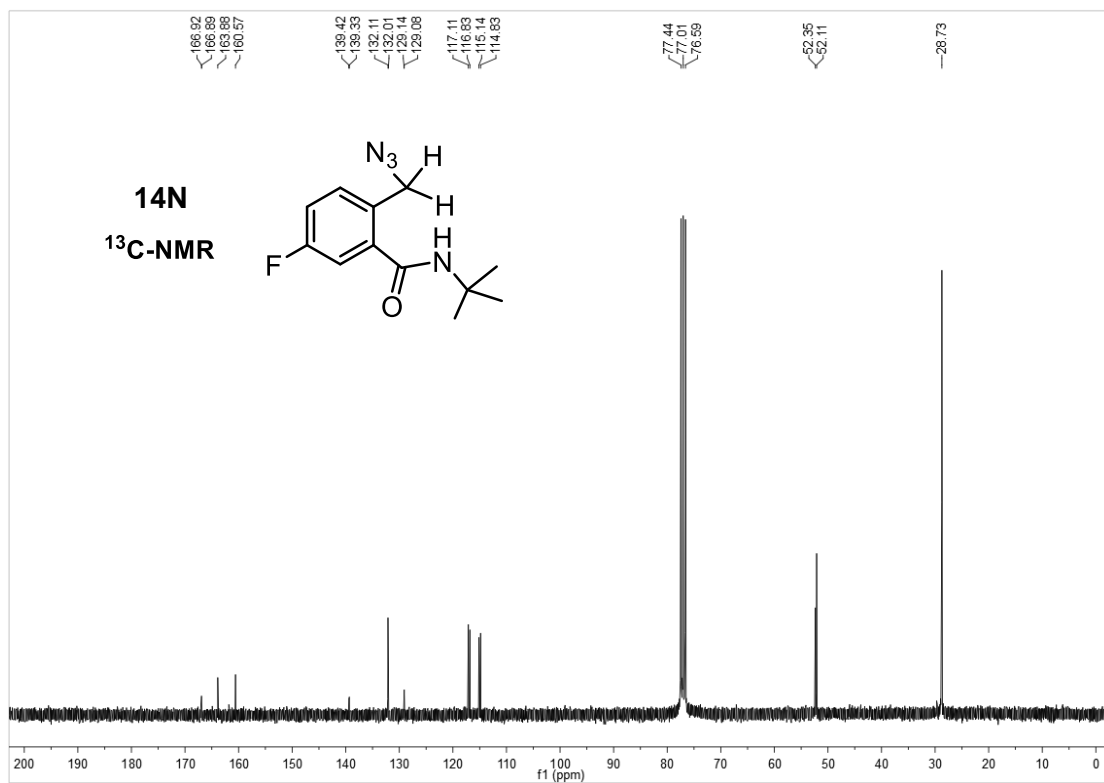

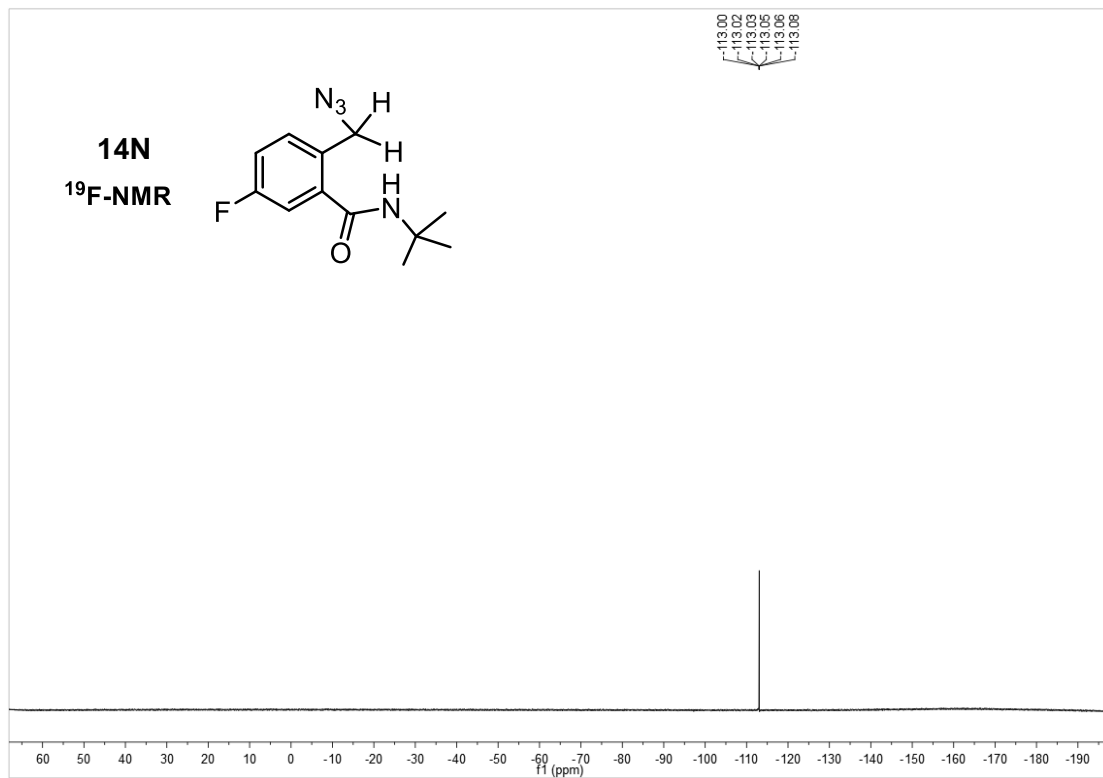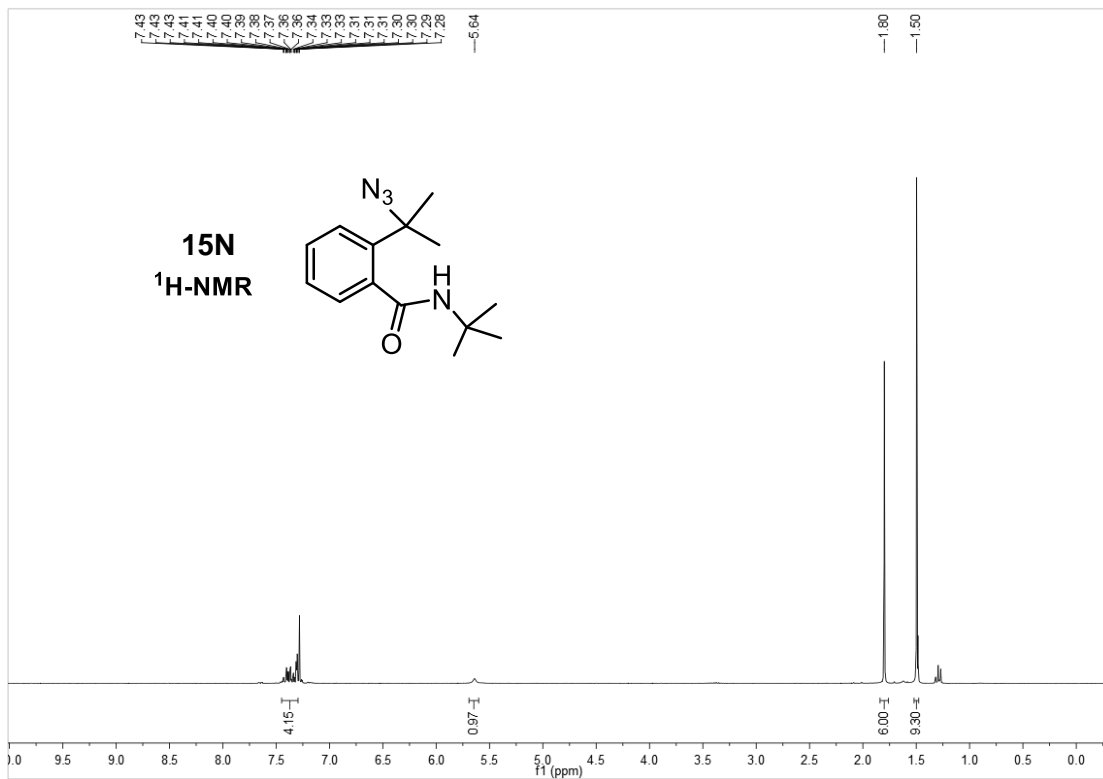

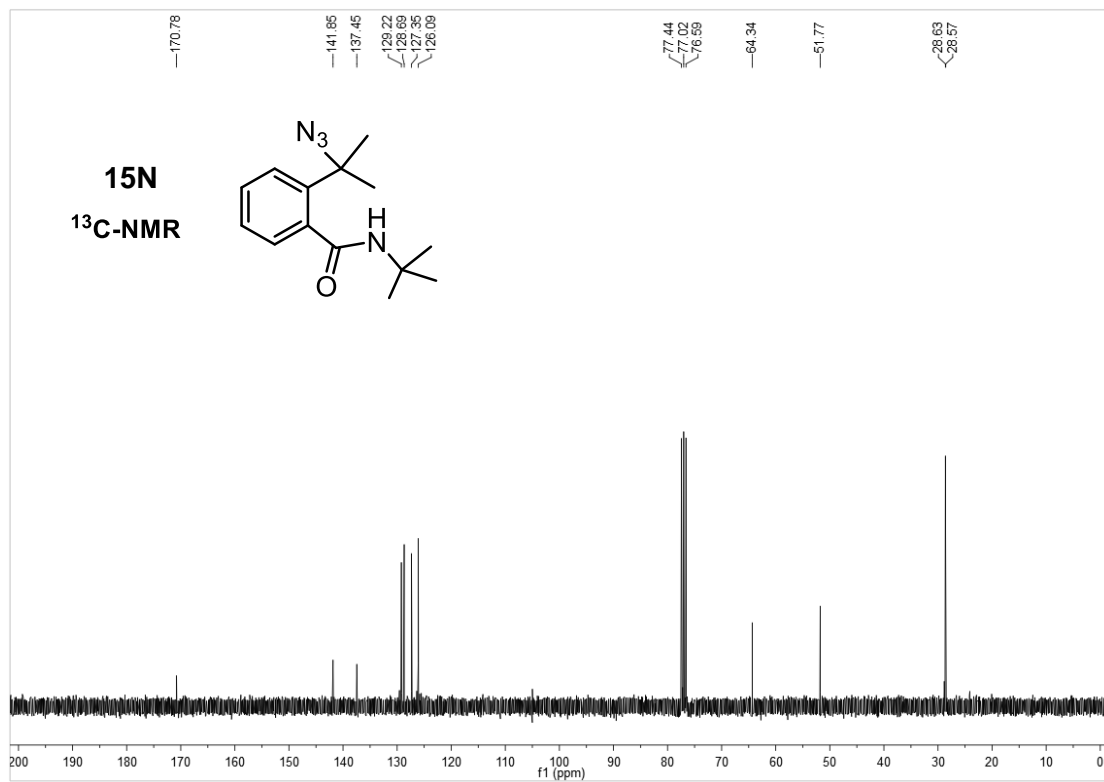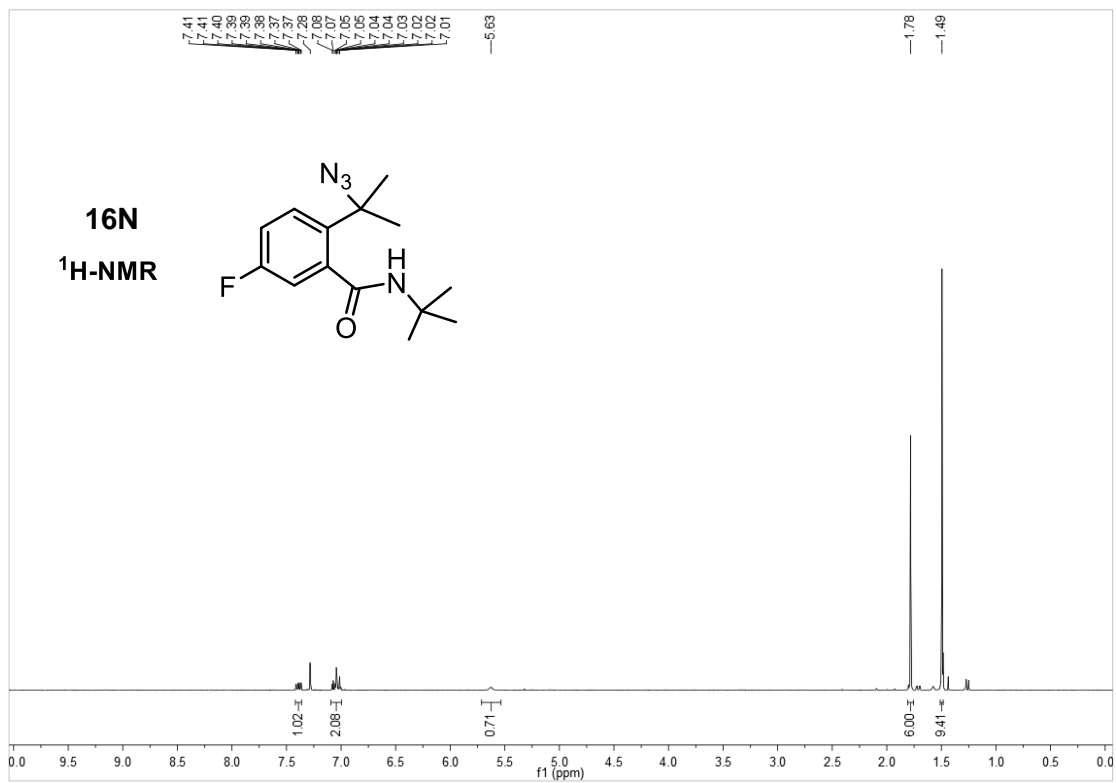



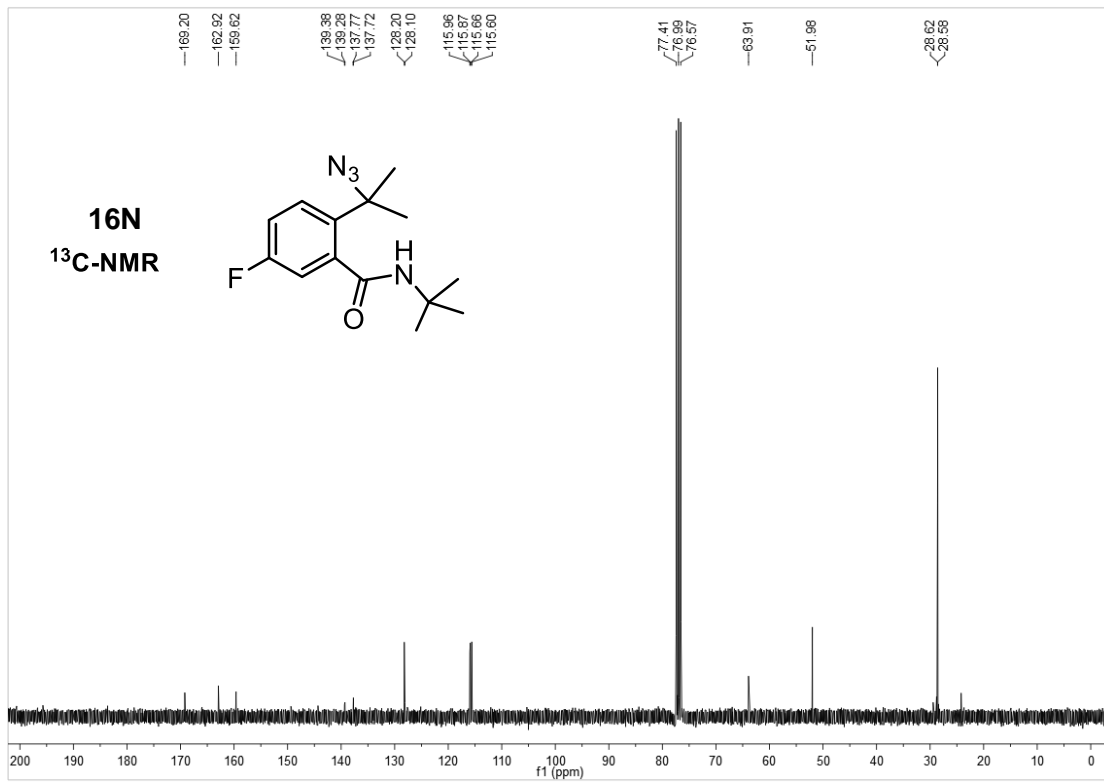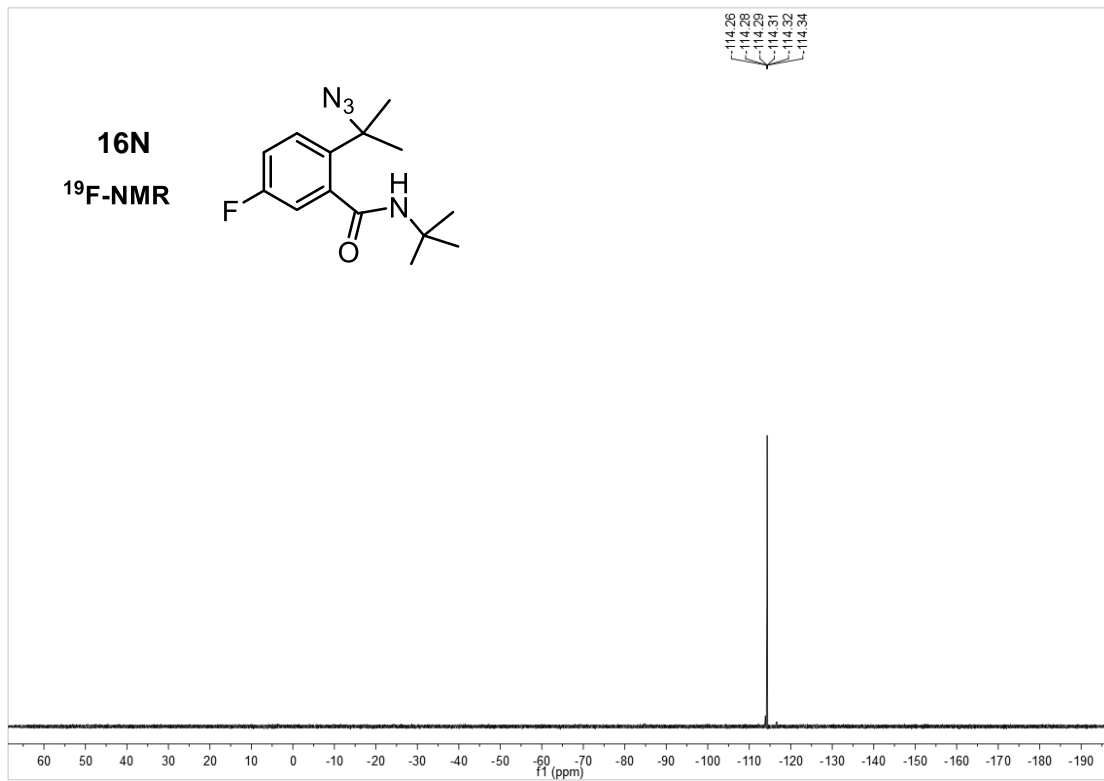

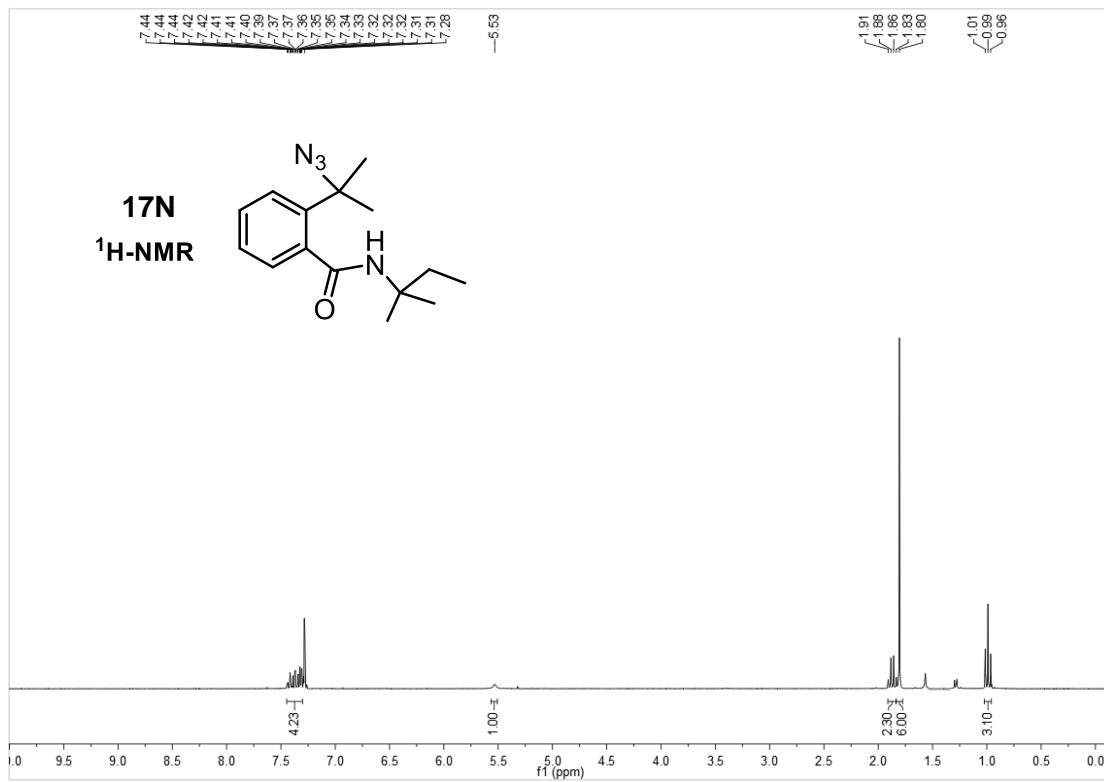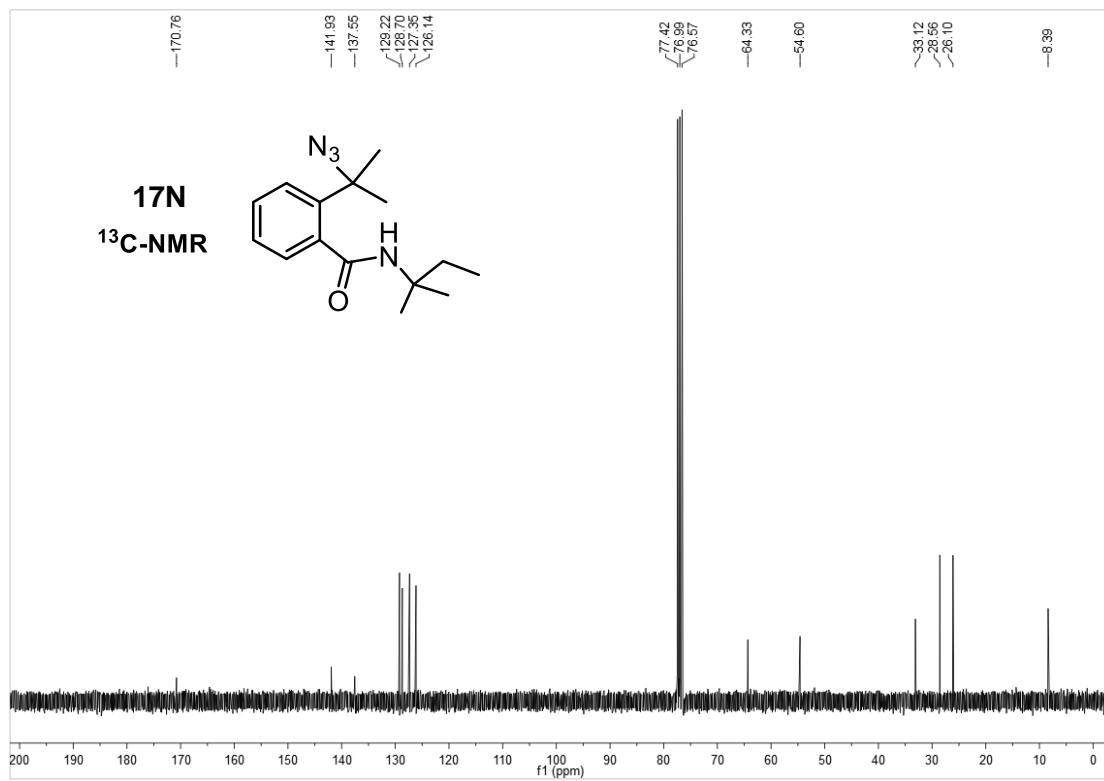

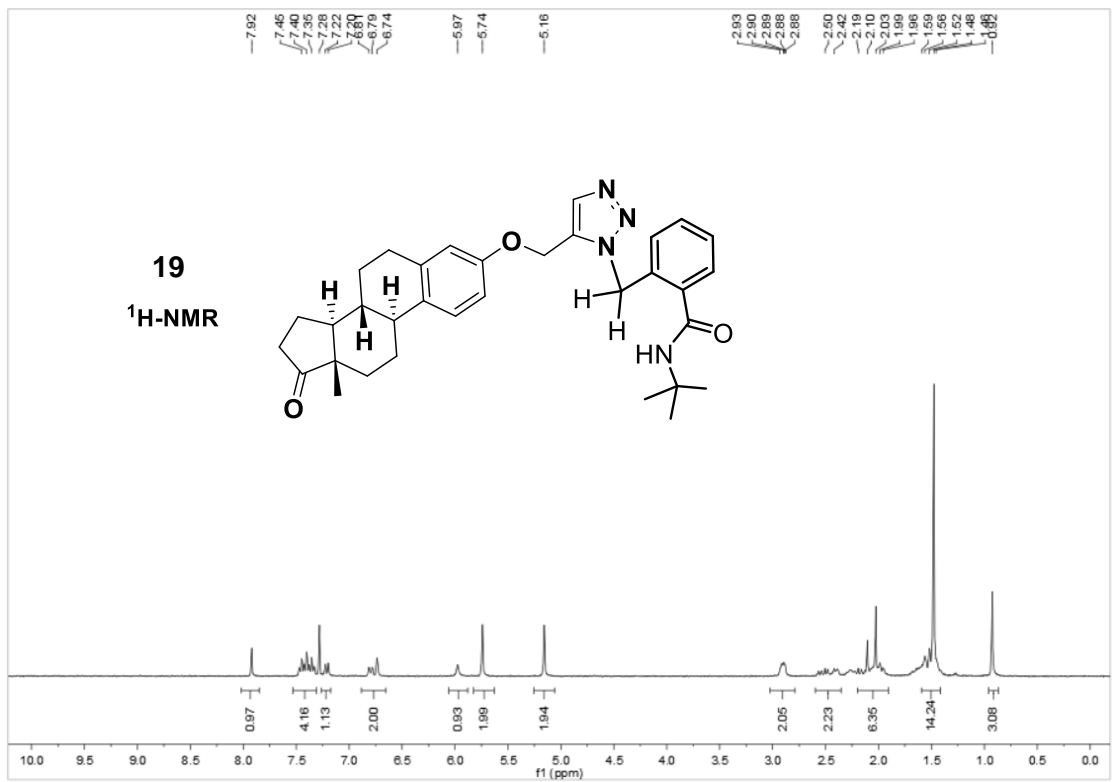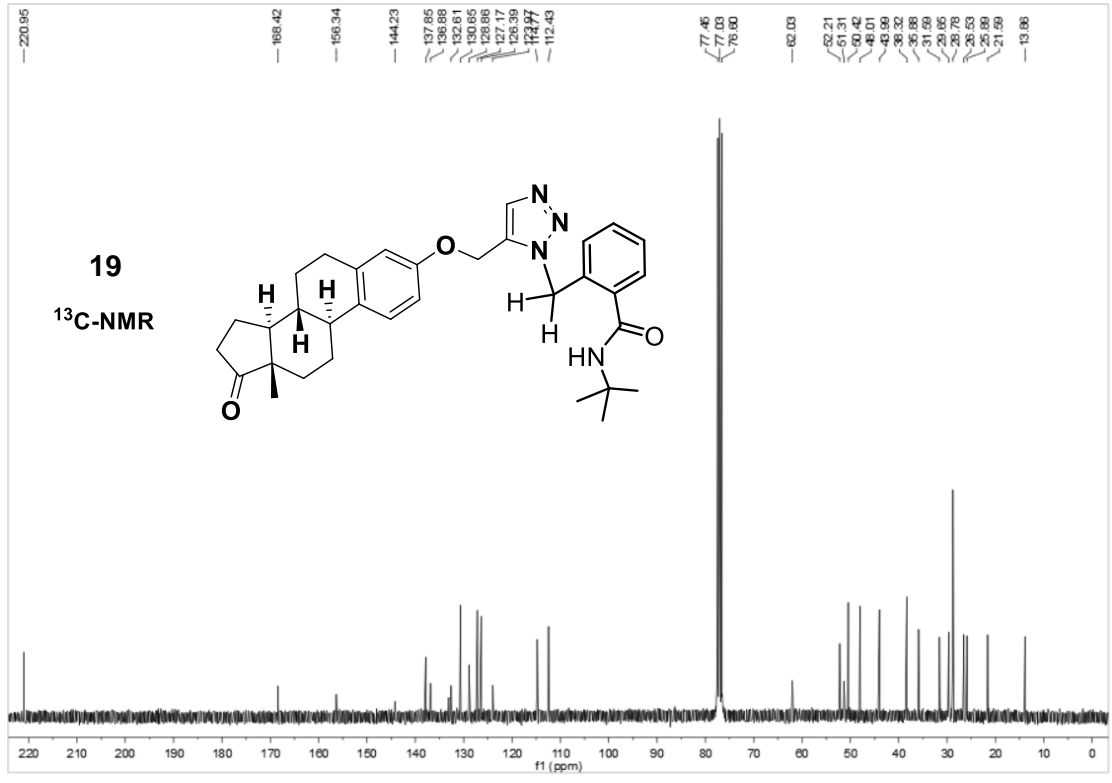

## References and notes

1. F. H. Arnold, Directed Evolution: Bringing New Chemistry to Life. *Angew. Chem. Int. Ed.* **57**, 4143–4148 (2018). [doi:10.1002/anie.201708408](https://doi.org/10.1002/anie.201708408) [Medline](#)
2. U. T. Bornscheuer, The fourth wave of biocatalysis is approaching. *Philos. Trans. R. Soc. A* **376**, 20170063 (2018). [doi:10.1098/rsta.2017.0063](https://doi.org/10.1098/rsta.2017.0063) [Medline](#)
3. K. Chen, F. H. Arnold, Engineering new catalytic activities in enzymes. *Nat. Catal.* **3**, 203–213 (2020). [doi:10.1038/s41929-019-0385-5](https://doi.org/10.1038/s41929-019-0385-5)
4. O. F. Brandenburg, R. Fasan, F. H. Arnold, Exploiting and engineering hemoproteins for abiological carbene and nitrene transfer reactions. *Curr. Opin. Biotechnol.* **47**, 102–111 (2017). [doi:10.1016/j.copbio.2017.06.005](https://doi.org/10.1016/j.copbio.2017.06.005) [Medline](#)
5. K. F. Biegasiewicz, S. J. Cooper, X. Gao, D. G. Oblinsky, J. H. Kim, S. E. Garfinkle, L. A. Joyce, B. A. Sandoval, G. D. Scholes, T. K. Hyster, Photoexcitation of flavoenzymes enables a stereoselective radical cyclization. *Science* **364**, 1166–1169 (2019). [doi:10.1126/science.aaw1143](https://doi.org/10.1126/science.aaw1143) [Medline](#)
6. X. Huang, B. Wang, Y. Wang, G. Jiang, J. Feng, H. Zhao, Photoenzymatic enantioselective intermolecular radical hydroalkylation. *Nature* **584**, 69–74 (2020). [doi:10.1038/s41586-020-2406-6](https://doi.org/10.1038/s41586-020-2406-6) [Medline](#)
7. P. Ji, J. Park, Y. Gu, D. S. Clark, J. F. Hartwig, Abiotic reduction of ketones with silanes catalysed by carbonic anhydrase through an enzymatic zinc hydride. *Nat. Chem.* **13**, 312–318 (2021). [doi:10.1038/s41557-020-00633-7](https://doi.org/10.1038/s41557-020-00633-7) [Medline](#)
8. L. M. Stateman, K. M. Nakafuku, D. A. Nagib, Remote C-H Functionalization via Selective Hydrogen Atom Transfer. *Synthesis* **50**, 1569–1586 (2018). [doi:10.1055/s-0036-1591930](https://doi.org/10.1055/s-0036-1591930) [Medline](#)
9. C. Zhang, Z.-L. Li, Q.-S. Gu, X.-Y. Liu, Catalytic enantioselective C(sp<sup>3</sup>)-H functionalization involving radical intermediates. *Nat. Commun.* **12**, 475 (2021). [doi:10.1038/s41467-020-20770-4](https://doi.org/10.1038/s41467-020-20770-4) [Medline](#)
10. F. Wang, P. Chen, G. Liu, Copper-Catalyzed Radical Relay for Asymmetric Radical Transformations. *Acc. Chem. Res.* **51**, 2036–2046 (2018). [doi:10.1021/acs.accounts.8b00265](https://doi.org/10.1021/acs.accounts.8b00265) [Medline](#)
11. B. J. Groendyke, D. I. AbuSalim, S. P. Cook, Iron-Catalyzed, Fluoroamide-Directed C-H Fluorination. *J. Am. Chem. Soc.* **138**, 12771–12774 (2016). [doi:10.1021/jacs.6b08171](https://doi.org/10.1021/jacs.6b08171) [Medline](#)
12. C. Crowe, S. Molyneux, S. V. Sharma, Y. Zhang, D. S. Gkotsi, H. Connaris, R. J. M. Goss, Halogenases: A palette of emerging opportunities for synthetic biology-synthetic chemistry and C-H functionalisation. *Chem. Soc. Rev.* **50**, 9443–9481 (2021). [doi:10.1039/DOCS01551B](https://doi.org/10.1039/DOCS01551B) [Medline](#)
13. M. L. Matthews, W. C. Chang, A. P. Layne, L. A. Miles, C. Krebs, J. M. Bollinger Jr., Direct nitration and azidation of aliphatic carbons by an iron-dependent halogenase. *Nat. Chem. Biol.* **10**, 209–215 (2014). [doi:10.1038/nchembio.1438](https://doi.org/10.1038/nchembio.1438) [Medline](#)

14. M. E. Neugebauer, K. H. Sumida, J. G. Pelton, J. L. McMurry, J. A. Marchand, M. C. Y. Chang, A family of radical halogenases for the engineering of amino-acid-based products. *Nat. Chem. Biol.* **15**, 1009–1016 (2019). [doi:10.1038/s41589-019-0355-x](https://doi.org/10.1038/s41589-019-0355-x) [Medline](#)
15. C. Y. Kim, A. J. Mitchell, C. M. Glinkerman, F.-S. Li, T. Pluskal, J.-K. Weng, The chloroalkaloid (-)-acutumine is biosynthesized via a Fe(II)- and 2-oxoglutarate-dependent halogenase in Menispermaceae plants. *Nat. Commun.* **11**, 1867 (2020). [doi:10.1038/s41467-020-15777-w](https://doi.org/10.1038/s41467-020-15777-w) [Medline](#)
16. X. Huang, J. T. Groves, Beyond ferryl-mediated hydroxylation: 40 years of the rebound mechanism and C-H activation. *J. Biol. Inorg.* **22**, 185–207 (2017). [doi:10.1007/s00775-016-1414-3](https://doi.org/10.1007/s00775-016-1414-3) [Medline](#)
17. P. Sivaguru, Y. Ning, X. Bi, New Strategies for the Synthesis of Aliphatic Azides. *Chem. Rev.* **121**, 4253–4307 (2021). [doi:10.1021/acs.chemrev.0c01124](https://doi.org/10.1021/acs.chemrev.0c01124) [Medline](#)
18. M. Meldal, C. W. Tornøe, Cu-catalyzed azide-alkyne cycloaddition. *Chem. Rev.* **108**, 2952–3015 (2008). [doi:10.1021/cr0783479](https://doi.org/10.1021/cr0783479) [Medline](#)
19. A. M. Orville, V. J. Chen, A. Kriauciunas, M. R. Harpel, B. G. Fox, E. Münck, J. D. Lipscomb, Thiolate ligation of the active site Fe<sup>2+</sup> of isopenicillin N synthase derives from substrate rather than endogenous cysteine: Spectroscopic studies of site-specific Cys---Ser mutated enzymes. *Biochemistry* **31**, 4602–4612 (1992). [doi:10.1021/bi00134a010](https://doi.org/10.1021/bi00134a010) [Medline](#)
20. C. Bull, J. A. Fee, Steady-state kinetic studies of superoxide dismutases: Properties of the iron containing protein from *Escherichia coli*. *J. Am. Chem. Soc.* **107**, 3295–3304 (1985). [doi:10.1021/ja00297a040](https://doi.org/10.1021/ja00297a040)
21. K. Meyer, E. Bill, B. Mienert, T. Weyhermüller, K. Wieghardt, Photolysis of *cis*- and *trans*-[Fe<sup>III</sup>(cyclam)(N<sub>3</sub>)<sub>2</sub>]<sup>+</sup> Complexes: Spectroscopic Characterization of a Nitridoiron(V) Species. *J. Am. Chem. Soc.* **121**, 4859–4876 (1999). [doi:10.1021/ja983454t](https://doi.org/10.1021/ja983454t)
22. C. A. Grapperhaus, B. Mienert, E. Bill, T. Weyhermüller, K. Wieghardt, Mononuclear (nitrido)iron(V) and (oxo)iron(IV) complexes via photolysis of [(cyclam-acetato)Fe<sup>III</sup>(N<sub>3</sub>)]<sup>+</sup> and ozonolysis of [(cyclam-acetato)Fe<sup>III</sup>(O<sub>3</sub>SCF<sub>3</sub>)]<sup>+</sup> in water/acetone mixtures. *Inorg. Chem.* **39**, 5306–5317 (2000). [doi:10.1021/ic0005238](https://doi.org/10.1021/ic0005238) [Medline](#)
23. J. M. Brownlee, K. Johnson-Winters, D. H. T. Harrison, G. R. Moran, Structure of the ferrous form of (4-hydroxyphenyl)pyruvate dioxygenase from *Streptomyces avermitilis* in complex with the therapeutic herbicide, NTBC. *Biochemistry* **43**, 6370–6377 (2004). [doi:10.1021/bi049317s](https://doi.org/10.1021/bi049317s) [Medline](#)
24. E. N. Pinter, J. E. Bingham, D. I. AbuSalim, S. P. Cook, N-Directed fluorination of unactivated Csp<sup>3</sup>-H bonds. *Chem. Sci.* **11**, 1102–1106 (2020). [doi:10.1039/C9SC04055B](https://doi.org/10.1039/C9SC04055B)
25. M. L. Matthews, C. S. Neumann, L. A. Miles, T. L. Grove, S. J. Booker, C. Krebs, C. T. Walsh, J. M. Bollinger Jr., Substrate positioning controls the partition between halogenation and hydroxylation in the aliphatic halogenase, SyrB2. *Proc. Natl. Acad. Sci. U.S.A.* **106**, 17723–17728 (2009). [doi:10.1073/pnas.0909649106](https://doi.org/10.1073/pnas.0909649106) [Medline](#)

26. L. C. Blasiak, C. L. Drennan, Structural perspective on enzymatic halogenation. *Acc. Chem. Res.* **42**, 147–155 (2009). [doi:10.1021/ar800088r](https://doi.org/10.1021/ar800088r) [Medline](#)
27. D. G. Gibson, L. Young, R.-Y. Chuang, J. C. Venter, C. A. Hutchison III, H. O. Smith, Enzymatic assembly of DNA molecules up to several hundred kilobases. *Nat. Methods* **6**, 343–345 (2009). [doi:10.1038/nmeth.1318](https://doi.org/10.1038/nmeth.1318) [Medline](#)
28. M. Sawa, T.-L. Hsu, T. Itoh, M. Sugiyama, S. R. Hanson, P. K. Vogt, C.-H. Wong, Glycoproteomic probes for fluorescent imaging of fucosylated glycans *in vivo*. *Proc. Natl. Acad. Sci. U.S.A.* **103**, 12371–12376 (2006). [doi:10.1073/pnas.0605418103](https://doi.org/10.1073/pnas.0605418103) [Medline](#)
29. T. Fujita, T. Nishioka, *Prog. Phys. Org. Chem.* **12**, 49–89 (1976).
30. X. Bao, Q. Wang, J. Zhu, Copper-catalyzed remote C(sp<sup>3</sup>)-H azidation and oxidative trifluoromethylation of benzohydrazides. *Nat. Commun.* **10**, 769 (2019). [doi:10.1038/s41467-019-08741-w](https://doi.org/10.1038/s41467-019-08741-w) [Medline](#)
31. R. O. Torres-Ochoa, A. Leclair, Q. Wang, J. Zhu, C. Iron-Catalysed Remote, (sp<sup>3</sup>)-H Azidation of O-Acyl Oximes and N-Acyloxy Imidates Enabled by 1,5-Hydrogen Atom Transfer of Iminyl and Imidate Radicals: Synthesis of  $\gamma$ -Azido Ketones and  $\beta$ -Azido Alcohols. *Chemistry* **25**, 9477–9484 (2019). [doi:10.1002/chem.201901079](https://doi.org/10.1002/chem.201901079) [Medline](#)
32. K.-J. Bian, C.-Y. Wang, Y.-L. Huang, Y.-H. Xu, X.-S. Wang, Remote azidation of C(sp<sup>3</sup>)-H bonds to synthesize  $\delta$ -azido sulfonamides via iron-catalyzed radical relay. *Org. Biomol. Chem.* **18**, 5354–5358 (2020). [doi:10.1039/D0OB00964D](https://doi.org/10.1039/D0OB00964D) [Medline](#)
33. Q.-Q. Min, J.-W. Yang, M.-J. Pang, G.-Z. Ao, F. Liu, Copper-catalyzed, N-directed remote C(sp<sup>3</sup>)-H azidation and thiocyanation. *Org. Chem. Front.* **8**, 249–253 (2021). [doi:10.1039/D0QO01012J](https://doi.org/10.1039/D0QO01012J)
34. Z.-H. Zhang, X.-Y. Dong, X.-Y. Du, Q.-S. Gu, Z.-L. Li, X.-Y. Liu, Copper-catalyzed enantioselective Sonogashira-type oxidative cross-coupling of unactivated C(sp<sup>3</sup>)-H bonds with alkynes. *Nat. Commun.* **10**, 5689 (2019). [doi:10.1038/s41467-019-13705-1](https://doi.org/10.1038/s41467-019-13705-1) [Medline](#)
35. D. T. Petasis, M. P. Hendrich, Quantitative Interpretation of Multifrequency Multimode EPR Spectra of Metal Containing Proteins, Enzymes, and Biomimetic Complexes. *Methods Enzymol.* **563**, 171–208 (2015). [doi:10.1016/bs.mie.2015.06.025](https://doi.org/10.1016/bs.mie.2015.06.025) [Medline](#)
36. G. W. T. M. J. Frisch, H. B. Schlegel, G. E. Scuseria, M. A. Robb, J. R. Cheeseman, G. Scalmani, V. Barone, G. A. Petersson, H. Nakatsuji, X. Li, M. Caricato, A. Marenich, J. Bloino, B. G. Janesko, R. Gomperts, B. Mennucci, H. P. Hratchian, J. V. Ortiz, A. F. Izmaylov, J. L. Sonnenberg, D. Williams-Young, F. Ding, F. Lipparini, F. Egidi, J. Goings, B. Peng, A. Petrone, T. Henderson, D. Ranasinghe, V. G. Zakrzewski, J. Gao, N. Rega, G. Zheng, W. Liang, M. Hada, M. Ehara, K. Toyota, R. Fukuda, J. Hasegawa, M. Ishida, T. Nakajima, Y. Honda, O. Kitao, H. Nakai, T. Vreven, K. Throssell, J. A. Montgomery Jr., J. E. Peralta, F. Ogliaro, M. Bearpark, J. J. Heyd, E. Brothers, K. N. Kudin, V. N. Staroverov, T. Keith, R. Kobayashi, J. Normand, K. Raghavachari, A. Rendell, J. C. Burant, S. S. Iyengar, J. Tomasi, M. Cossi, J. M. Millam, M. Klene, C. Adamo, R. Cammi, J. W. Ochterski, R. L. Martin, K. Morokuma, O. Farkas, J. B. Foresman, D. J. Fox, Gaussian 09, Revision A.02. (Gaussian Inc., 2009); <https://gaussian.com/g09citation/>

37. C. Lee, W. Yang, R. G. Parr, Development of the Colle-Salvetti correlation-energy formula into a functional of the electron density. *Phys. Rev. B Condens. Matter* **37**, 785–789 (1988). [doi:10.1103/PhysRevB.37.785](https://doi.org/10.1103/PhysRevB.37.785) [Medline](#)
38. A. D. Becke, Density-functional thermochemistry. III. The role of exact exchange. *J. Chem. Phys.* **98**, 5648–5652 (1993). [doi:10.1063/1.464913](https://doi.org/10.1063/1.464913)
39. A. D. Becke, Density-functional exchange-energy approximation with correct asymptotic behavior. *Phys. Rev. A* **38**, 3098–3100 (1988). [doi:10.1103/PhysRevA.38.3098](https://doi.org/10.1103/PhysRevA.38.3098) [Medline](#)
40. M. Cossi, N. Rega, G. Scalmani, V. Barone, Energies, structures, and electronic properties of molecules in solution with the C-PCM solvation model. *J. Comput. Chem.* **24**, 669–681 (2003). [doi:10.1002/jcc.10189](https://doi.org/10.1002/jcc.10189) [Medline](#)
41. V. Barone, M. Cossi, Quantum Calculation of Molecular Energies and Energy Gradients in Solution by a Conductor Solvent Model. *J. Phys. Chem. A* **102**, 1995–2001 (1998). [doi:10.1021/jp9716997](https://doi.org/10.1021/jp9716997)
42. C. N. Schutz, A. Warshel, What are the dielectric “constants” of proteins and how to validate electrostatic models? *Proteins* **44**, 400–417 (2001). [doi:10.1002/prot.1106](https://doi.org/10.1002/prot.1106) [Medline](#)
43. R. F. Ribeiro, A. V. Marenich, C. J. Cramer, D. G. Truhlar, Use of solution-phase vibrational frequencies in continuum models for the free energy of solvation. *J. Phys. Chem. B* **115**, 14556–14562 (2011). [doi:10.1021/jp205508z](https://doi.org/10.1021/jp205508z) [Medline](#)
44. Y. Zhao, D. G. Truhlar, Computational characterization and modeling of buckyball tweezers: Density functional study of concave-convex  $\pi\cdots\pi$  interactions. *Phys. Chem. Chem. Phys.* **10**, 2813–2818 (2008). [doi:10.1039/b717744e](https://doi.org/10.1039/b717744e) [Medline](#)
45. I. Funes-Ardoiz, R. S. Paton, Goodvibes, version 2.0.3, Zenodo (2018); <http://doi.org/10.5281/zenodo.1435820>.
46. C. Legault, Cylview, 1.0 B (2009); <http://www.cylview.org>.
47. L. L. C. Schrödinger, The Pymol Molecular Graphics System, Version 1.8. (2015); <https://pymol.org/2/>
48. D. A. Case, R. C. Walker, T. E. Cheatham III, C. Simmerling, A. Roitberg, K. M. Merz, R. Luo, T. Darden, J. Wang, R. E. Duke, D. R. Roe, S. LeGrand, J. Swails, D. Cerutti, G. Monard, C. Sagui, J. Kaus, R. Betz, B. Madej, C. Lin, D. Mermelstein, P. Li, A. Onufriev, S. Izadi, R. M. Wolf, X. Wu, A. W. Götz, H. Gohlke, N. Homeyer, W. M. Botello-Smith, L. Xiao, T. Luchko, T. Giese, T. Lee, H. T. Nguyen, H. Nguyen, P. Janowski, I. Omelyan, A. Kovalenko, P. A. Kollman, *Amber 2016 Reference Manual*, (2016).
49. J. Wang, R. M. Wolf, J. W. Caldwell, P. A. Kollman, D. A. Case, Development and testing of a general amber force field. *J. Comput. Chem.* **25**, 1157–1174 (2004). [doi:10.1002/jcc.20035](https://doi.org/10.1002/jcc.20035) [Medline](#)
50. C. I. Bayly, P. Cieplak, W. Cornell, P. A. Kollman, A well-behaved electrostatic potential based method using charge restraints for deriving atomic charges: The RESP model. *J. Phys. Chem.* **97**, 10269–10280 (1993). [doi:10.1021/j100142a004](https://doi.org/10.1021/j100142a004)

51. U. C. Singh, P. A. Kollman, An approach to computing electrostatic charges for molecules. *J. Comput. Chem.* **5**, 129–145 (1984). [doi:10.1002/jcc.540050204](https://doi.org/10.1002/jcc.540050204)
52. B. H. Besler, K. M. Merz, P. A. Kollman, Atomic charges derived from semiempirical methods. *J. Comput. Chem.* **11**, 431–439 (1990). [doi:10.1002/jcc.540110404](https://doi.org/10.1002/jcc.540110404)
53. P. Li, K. M. Merz Jr., MCPB.py: A Python Based Metal Center Parameter Builder. *J. Chem. Inf. Model.* **56**, 599–604 (2016). [doi:10.1021/acs.jcim.5b00674](https://doi.org/10.1021/acs.jcim.5b00674) [Medline](#)
54. W. L. Jorgensen, J. Chandrasekhar, J. D. Madura, R. W. Impey, M. L. Klein, Comparison of simple potential functions for simulating liquid water. *J. Chem. Phys.* **79**, 926–935 (1983). [doi:10.1063/1.445869](https://doi.org/10.1063/1.445869)
55. J. A. Maier, C. Martinez, K. Kasavajhala, L. Wickstrom, K. E. Hauser, C. Simmerling, ff14SB: Improving the Accuracy of Protein Side Chain and Backbone Parameters from ff99SB. *J. Chem. Theory Comput.* **11**, 3696–3713 (2015). [doi:10.1021/acs.jctc.5b00255](https://doi.org/10.1021/acs.jctc.5b00255) [Medline](#)
56. T. Darden, D. York, L. Pedersen, Particle mesh Ewald: An  $N \cdot \log(N)$  method for Ewald sums in large systems. *J. Chem. Phys.* **98**, 10089–10092 (1993). [doi:10.1063/1.464397](https://doi.org/10.1063/1.464397)
57. D. R. Roe, T. E. Cheatham III, PTRAJ and CPPTRAJ: Software for Processing and Analysis of Molecular Dynamics Trajectory Data. *J. Chem. Theory Comput.* **9**, 3084–3095 (2013). [doi:10.1021/ct400341p](https://doi.org/10.1021/ct400341p) [Medline](#)
58. O. Trott, A. J. Olson, AutoDock Vina: Improving the speed and accuracy of docking with a new scoring function, efficient optimization, and multithreading. *J. Comput. Chem.* **31**, 455–461 (2010). [Medline](#)
59. M. Srncic, E. I. Solomon, Frontier Molecular Orbital Contributions to Chlorination versus Hydroxylation Selectivity in the Non-Heme Iron Halogenase SyrB2. *J. Am. Chem. Soc.* **139**, 2396–2407 (2017). [doi:10.1021/jacs.6b11995](https://doi.org/10.1021/jacs.6b11995) [Medline](#)
60. X. Huang, T. M. Bergsten, J. T. Groves, Manganese-catalyzed late-stage aliphatic C-H azidation. *J. Am. Chem. Soc.* **137**, 5300–5303 (2015). [doi:10.1021/jacs.5b01983](https://doi.org/10.1021/jacs.5b01983) [Medline](#)
61. G. M. Sheldrick, Crystal structure refinement with SHELXL. *Acta Crystallogr. C Struct. Chem.* **71**, 3–8 (2015). [doi:10.1107/S2053229614024218](https://doi.org/10.1107/S2053229614024218) [Medline](#)
